# Supplementary material for: Reconstruction of the genome-scale metabolic network model of Sinorhizobium fredii CCBAU45436 for free-living and symbiotic states
Source: Front Bioeng Biotechnol. 2024 Mar 25;12:1377334. doi: 10.3389/fbioe.2024.1377334 (PMC10999553; doi:10.3389/fbioe.2024.1377334)
Supplement: Supplementary file 5 [file Table1.XLSX]

## Sheet: Reactions
Reactions in iAQY970
Number	Rxn	RxnSBO	Description	Formula	Reversible	GPR	LB	UB	Subsystem	EC number	KEGG ID	KBase ID	BiGG ID	MetaCyc ID	METANETX	RHEA	Note
1	r_0001	SBO:0000176	glucose-1-phosphate adenylyltransferase	atp[c] + g1p[c] -> ppi[c] + adpglc[c]	FALSE	AB395_RS15515	0	1000	Glycolysis / Gluconeogenesis	2.7.7.27	R00948	rxn00695	GLGC; GLGCr	GLUC1PADENYLTRANS-RXN	MNXR100243	12121	extract from iCC541
2	r_0002	SBO:0000176	glutaminase	h2o[c] + gln__L[c] -> h[c] + glu__L[c] + nh3[c]	FALSE	AB395_RS08065	0	1000	Nitrogen Metabolism	3.5.1.2	R00256	rxn00189	GLUN; GLUNpp; U42; U43	GLUTAMIN-RXN	MNXR100030	15890	extract from iCC541
3	r_0003	SBO:0000176	3-hydroxyacyl-CoA dehydrogenase (acetoacetyl-CoA)	h[c] + nadh[c] + aacoa[c] <=> nad[c] + 3hbcoa[c]	TRUE	AB395_RS29085 or AB395_RS12850	-1000	1000	Fatty Acid Metabolism	1.1.1.35	R01975	rxn01451	HACD1; HACD1i	RXN-11662	MNXR100541	30802	extract from iCC541
4	r_0004	SBO:0000176	Iron-sulfur cluster assembly	4 s[c] + 4 fe2[c] -> Iron[c]	FALSE	AB395_RS05680	0	1000	Sulfur Metabolism; Symbiosis	[]	[]	[]	[]	[]	[]	[]	extract from iCC541
5	r_0005	SBO:0000176	3-oxoacyl-[acyl-carrier-protein] reductase (n-C10:0)	h[c] + nadph[c] + 3odecACP[c] <=> nadp[c] + 3hdecACP[c]	TRUE	AB395_RS09750 and AB395_RS03985 and AB395_RS16655 and AB395_RS27030	-1000	1000	Fatty Acid Biosynthesis	1.1.1.100	R04534	rxn05338	3OAR100; HDER4; HDER4r	RXN-9528	MNXR94941	[]	extract from iCC541
6	r_0006	SBO:0000176	fatty-acid--CoA ligase (hexadecanoate)	atp[c] + h[c] + coa[c] + hdca[c] <=> ppi[c] + amp[c] + pmtcoa[c]	TRUE	AB395_RS19240 or AB395_RS32400 or AB395_RS00590 or AB395_RS02630	-1000	1000	Fatty Acid Metabolism	6.2.1.3	R01280	rxn00947	FAA1_3; FAA3_1; FAA4_1; FACOAL160; FACOAL160p; FAT1_1	RXN-9623	MNXR99153	30754	extract from iCC541
7	r_0007	SBO:0000176	deoxyuridine phosphorylase	h[c] + duri[c] + pi[c] <=> 2dr1p[c] + ura[c]	TRUE	AB395_RS18635	-1000	1000	Pyrimidine Metabolism	2.4.2.4	R02484	rxn01799	DURIPP; PNP1_1	URA-PHOSPH-RXN	MNXR97818	22827	extract from iCC541
8	r_0008	SBO:0000176	glucose 6-phosphate dehydrogenase	nadp[c] + g6p[c] -> h[c] + nadph[c] + 6pgl[c]	FALSE	AB395_RS01690	0	1000	Pentose Phosphate Pathway	1.1.1.49	R00835	rxn00604	G6PDH; G6PDH2; G6PDH2er; G6PDH2r; G6PDHy; ZWF1	RXN-14819	MNXR118956	[]	extract from iCC541
9	r_0009	SBO:0000176	2-Oxo-4-methyl-3-carboxypentanoate decarboxylation	h[c] + 3c4mop[c] -> co2[c] + 4mop[c]	FALSE	spontaneous	0	1000	Valine, Leucine and Isoleucine Biosynthesis	[]	R01652	rxn01208	OMCDC; OMCDCm	RXN-7800	MNXR102180	25079	extract from iCC541
10	r_0010	SBO:0000176	adenosylhomocysteinase	h2o[c] + ahcys[c] <=> hcys__L[c] + adn[c]	TRUE	AB395_RS18150	-1000	1000	Cysteine and Methionine Metabolism	3.12.2.1 or 3.13.2.1	R00192	rxn00141	AHC; AHCi; SAH1	ADENOSYLHOMOCYSTEINASE-RXN	MNXR95492	21711	extract from iCC541
11	r_0011	SBO:0000176	acetyl-CoA synthetase	atp[c] + h[c] + coa[c] + ac[c] -> ppi[c] + amp[c] + accoa[c]	FALSE	AB395_RS32325	0	1000	Glycolysis / Gluconeogenesis	6.2.1.1	R00235	rxn00175	ACS; ACS1; ACSm; ACSp; ACSr	ACETATE--COA-LIGASE-RXN	MNXR95413	23176	extract from iCC541
12	r_0012	SBO:0000176	Nicotinate-nucleotide dimethylbenzimidazole phosphoribosyltransferase	dmbzid[c] + nicrnt[c] -> h[c] + 5prdmbz[c] + nac[c]	FALSE	AB395_RS08545	0	1000	Porphyrin Metabolism	2.4.2.21	R04148	rxn02897	NNDMBRT	DMBPPRIBOSYLTRANS-RXN	MNXR101979	11197	extract from iCC541
13	r_0013	SBO:0000176	orotate phosphoribosyltransferase	ppi[c] + orot5p[c] <=> prpp[c] + orot[c]	TRUE	AB395_RS00570	-1000	1000	Pyrimidine Metabolism	2.4.2.10	R01870	rxn01362	ORPT; URA10; URA5; or PT	OROPRIBTRANS-RXN	MNXR102231	10383	extract from iCC541
14	r_0014	SBO:0000176	3-hydroxyacyl-CoA dehydrogenase (3-oxotetradecanoyl-CoA)	nad[c] + 3htdcoa[c] <=> h[c] + nadh[c] + 3otdcoa[c]	TRUE	AB395_RS12850 or AB395_RS29085	-1000	1000	Fatty Acid Metabolism	1.1.1.35	R04739	rxn06777	HACD6; HACD6i; HACD6p	RXN-12507	MNXR100547	31168	extract from iCC541
15	r_0015	SBO:0000176	cystathionine beta-synthase	hcys__L[c] + ser__L[c] -> h2o[c] + cyst__L[c]	FALSE	AB395_RS31685	0	1000	Glycine, Serine, and Threonine Metabolism	4.2.1.22	R01289	rxn00953	CYSTS	[]	[]	[]	extract from iCC541
16	r_0016	SBO:0000176	L-Phenylalanine,tetrahydro-biopterin:oxygen oxidoreductase (4-hydroxylating)	o2[c] + thbpt[c] + phe__L[c] -> h2o[c] + tyr__L[c] + dhbpt[c]	FALSE	[]	0	1000	Phenylalanine Tyrosine Tryptophan Biosynthesis	1.14.16.1	R01795	rxn01315	PHE4MO; PHETHPTOX	[]	[]	[]	extract from iCC541
17	r_0017	SBO:0000176	transketolase	xu5p__D[c] + r5p[c] <=> g3p[c] + s7p[c]	TRUE	AB395_RS15035	-1000	1000	Pentose Phosphate Pathway	2.2.1.1	R01641	rxn01200	[]	1TRANSKETO-RXN	MNXR141187	10511	extract from iCC541
18	r_0018	SBO:0000176	Cytosine deaminase	h2o[c] + csn[c] -> nh3[c] + ura[c]	FALSE	AB395_RS23710	0	1000	Pyrimidine Metabolism	3.5.4.1	R00974	rxn00717	CSND; FCY1	CYTDEAM-RXN	MNXR96927	20606	extract from iCC541
19	r_0019	SBO:0000176	3-isopropylmalate dehydrogenase reversible	nad[c] + 3c2hmp[c] <=> h[c] + nadh[c] + 3c4mop[c]	TRUE	AB395_RS17775	-1000	1000	Valine, Leucine and Isoleucine Biosynthesis	1.1.1.85	R04426	rxn03062	IPMD; IPMDr	3-ISOPROPYLMALDEHYDROG-RXN	MNXR100878	10895	extract from iCC541
20	r_0020	SBO:0000176	Nucleoside triphosphate tripolyhydrolase	h2o[c] + dgtp[c] <=> h[c] + pppi[c] + dgsn[c]	TRUE	AB395_RS06195	-1000	1000	Purine Metabolism	3.1.5.1	R01856	rxn01352	DGTPH; NTPTP1	DGTPTRIPHYDRO-RXN	MNXR102057	15194	extract from iCC541
21	r_0021	SBO:0000176	5-dehydro-2-deoxygluconokinase	atp[c] + d5kg[c] -> adp[c] + d5kgp[c]	FALSE	AB395_RS20175 and AB395_RS12800	0	1000	Inositol Phosphate Metabolism	2.7.1.92	R05661	rxn03932	D5KGK; R05661	5-DEHYDRO-2-DEOXYGLUCONOKINASE-RXN	MNXR97071	13498	extract from iCC541
22	r_0022	SBO:0000176	nucleoside-diphosphate kinase (ATP:GDP)	atp[c] + gdp[c] <=> adp[c] + gtp[c]	TRUE	AB395_RS04100	-1000	1000	Purine Metabolism	2.7.4.6	R00330	rxn00237	NDPK1; YNK1_8	GDPKIN-RXN	MNXR96119	27687	extract from iCC541
23	r_0023	SBO:0000176	nucleoside-diphosphate kinase (ATP:dCDP)	atp[c] + dcdp[c] <=> adp[c] + dctp[c]	TRUE	AB395_RS04100	-1000	1000	Pyrimidine Metabolism	2.7.4.6	R02326	rxn01673	NDPK7; YNK1_5	DCDPKIN-RXN	MNXR101939	27679	extract from iCC541
24	r_0024	SBO:0000185	Cytochrome oxidase (rhizobium)	2 h[c] + o2[c] + 2 qh2[c] -> 2 h2o[c] + 2 q[c] + 2 h[e]	FALSE	( AB395_RS08890 and AB395_RS08885 and AB395_RS08875) or (AB395_RS12770 and AB395_RS12765 and AB395_RS12755 and AB395_RS12760 )	0	1000	Oxidative Phosphorylation	[]	[]	rxn10113	[]	[]	[]	[]	extract from iCC541
25	r_0025	SBO:0000176	aspartate-semialdehyde dehydrogenase, irreversible	nadph[c] + 4pasp[c] -> nadp[c] + pi[c] + aspsa[c]	FALSE	AB395_RS08490 or AB395_RS17800	0	1000	Glycine, Serine, and Threonine Metabolism	1.2.1.11	R02291	rxn01643	ASAD; ASADi; HOM2	ASPARTATE-SEMIALDEHYDE-DEHYDROGENASE-RXN	MNXR96039	24287	extract from iCC541
26	r_0026	SBO:0000176	formyltetrahydrofolate deformylase	h2o[c] + 10fthf[c] -> h[c] + thf[c] + for[c]	FALSE	AB395_RS16015 or AB395_RS27405 or AB395_RS23780	0	1000	One carbon pool by folate	3.5.1.10	R00944	rxn00691	FTHFD	FORMYLTHFDEFORMYL-RXN	MNXR115889	19834	extract from iCC541
27	r_0027	SBO:0000176	GTP cyclohydrolase I	h2o[c] + gtp[c] -> h[c] + for[c] + ahdt[c]	FALSE	AB395_RS11715	0	1000	Folate Biosynthesis	3.5.4.16	R00424	rxn00299	FOL2; GTPCI	GTP-CYCLOHYDRO-I-RXN	MNXR100453	17473	extract from iCC541
28	r_0028	SBO:0000176	ribulose 5-phosphate 3-epimerase	ru5p__D[c] <=> xu5p__D[c]	TRUE	AB395_RS25710	-1000	1000	Pentose Phosphate Pathway	5.1.3.1	R01529	rxn01116	RPE; RPE1	RIBULP3EPIM-RXN	MNXR104083	13680	extract from iCC541
29	r_0029	SBO:0000176	ribonucleoside-diphosphate reductase (CDP)	cdp[c] + trdrd[c] -> h2o[c] + dcdp[c] + trdox[c]	FALSE	AB395_RS29165 and AB395_RS29160 and AB395_RS29155	0	1000	Pyrimidine Metabolism	1.17.4.1	R02024	rxn06076	RNDR3; RNDR3n	CDPREDUCT-RXN	MNXR104064	28040	extract from iCC541
30	r_0030	SBO:0000176	3-hydroxyacyl-CoA dehydratase (3-hydroxydecanoyl-CoA)	3hdcoa[c] <=> h2o[c] + dc2coa[c]	TRUE	AB395_RS04705 or AB395_RS11485 or AB395_RS28305 or AB395_RS20255	-1000	1000	Fatty Acid Metabolism	4.2.1.17	R04744	rxn03245	ECOAH4; ECOAH4p	RXN-13616	MNXR97889	31193	extract from iCC541
31	r_0031	SBO:0000176	L-aspartase	asp__L[c] -> h[c] + nh3[c] + fum[c]	FALSE	[]	0	1000	Alanine, Aspartate and Glutamate metabolism	4.3.1.1	R00490	rxn00347	ASPT	ASPARTASE-RXN	MNXR96099	16601	extract from iCC541
32	r_0032	SBO:0000176	L-glutamate 5-semialdehyde dehydratase, reversible	glu5sa[c] <=> h[c] + h2o[c] + 1pyr5c[c]	TRUE	spontaneous	-1000	1000	Arginine and Proline Metabolism	[]	R03314	rxn02374	G5SADr; G5SADrm; G5SADs; G5SADsi	SPONTPRO-RXN	MNXR99897	28237	extract from iCC541
33	r_0033	SBO:0000176	1-deoxy-D-xylulose reductoisomerase	h[c] + nadph[c] + dxyl5p[c] -> nadp[c] + 2me4p[c]	FALSE	AB395_RS16520	0	1000	Terpenoid Backbone Biosynthesis	1.1.1.267	R05688	rxn03958	DXPRI; DXPRIi	DXPREDISOM-RXN	MNXR97830	13720	extract from iCC541
34	r_0034	SBO:0000185	Malate transport via proton symport (2 H)	2 h[e] + mal__L[e] -> 2 h[c] + mal__L[c]	FALSE	AB395_RS21160	0	1000	Transport	[]	[]	rxn10153	[]	[]	[]	[]	extract from iCC541
35	r_0035	SBO:0000176	Cobinamide adenyltransferase	atp[c] + cbi[c] <=> pppi[c] + adocbi[c]	TRUE	AB395_RS08990	-1000	1000	Porphyrin Metabolism	2.5.1.17	R07268	rxn05029	CBIAT; CBIAT2	BTUR2-RXN	MNXR96465	14726	extract from iCC541
36	r_0036	SBO:0000176	tryptophan synthase (indoleglycerol phosphate)	3ig3p[c] <=> g3p[c] + indole[c]	TRUE	AB395_RS04315	-1000	1000	Phenylalanine Tyrosine Tryptophan Biosynthesis	4.2.1.20	R02340	rxn01682	TRPS3r	RXN0-2381	MNXR99889	14084	extract from iCC541
37	r_0037	SBO:0000176	isoleucine transaminase	glu__L[c] + 3mop[c] -> akg[c] + ile__L[c]	FALSE	AB395_RS19375 or AB395_RS03155	0	1000	Valine, Leucine and Isoleucine Biosynthesis	2.6.1.42	R02199	rxn01575	BAT1_2; BAT2_1; ILETA; ILETAm	BRANCHED-CHAINAMINOTRANSFERILEU-RXN	MNXR96228	24804	extract from iCC541
38	r_0038	SBO:0000176	3-dehydroquinate synthase	2dda7p[c] <=> h[c] + pi[c] + 3dhq[c]	FALSE	AB395_RS14135	-1000	1000	Phenylalanine Tyrosine Tryptophan Biosynthesis	4.2.3.4	R03083	rxn02212	ARO1_1; DHQS	3-DEHYDROQUINATE-SYNTHASE-RXN	MNXR97447	21969	extract from iCC541
39	r_0039	SBO:0000176	cystathionine b-lyase	h2o[c] + cyst__L[c] -> h[c] + nh3[c] + hcys__L[c] + pyr[c]	FALSE	AB395_RS05975	0	1000	Cysteine and Methionine Metabolism	4.4.1.13	R01286	[]	CYSTL; CYSTLp	[]	[]	[]	extract from iCC541
40	r_0040	SBO:0000176	tryptophan synthase (indole)	ser__L[c] + indole[c] -> h2o[c] + trp__L[c]	FALSE	AB395_RS04315	0	1000	Phenylalanine Tyrosine Tryptophan Biosynthesis	4.2.1.20	R00674	rxn00474	TRPS2	RXN0-2382	MNXR104946	26435	extract from iCC541
41	r_0041	SBO:0000176	pyruvate dehydrogenase (dihydrolipoamide) reversible	coa[c] + adhlam[c] <=> accoa[c] + dhlam[c]	TRUE	AB395_RS05815	-1000	1000	Glycolysis / Gluconeogenesis;TCA Cycle	2.3.1.12	R02569	rxn01871	LAT1; PDHbr	RXN0-1133	MNXR123104	[]	extract from iCC541
42	r_0042	SBO:0000176	Ferredoxin nadp reductase	h[c] + nadp[c] + 2 fdxrd[c] <=> nadph[c] + 2 fdxox[c]	TRUE	AB395_RS05940	-1000	1000	Nicotinate and Nicotinamide	1.18.1.2	[]	rxn05937	[]	[]	[]	[]	extract from iCC541
43	r_0043	SBO:0000176	HCO3 equilibration reaction	h2o[c] + co2[c] <=> h[c] + hco3[c]	TRUE	AB395_RS21750 or AB395_RS17810	-1000	1000	Nitrogen Metabolism	4.2.1.1	R00132	rxn00102	H2CO3D; HCO3E; HCO3Em; HCO3En	[]	[]	[]	extract from iCC541
44	r_0044	SBO:0000176	methionine adenosyltransferase	atp[c] + h2o[c] + met__L[c] -> ppi[c] + pi[c] + amet[c]	FALSE	AB395_RS00245	0	1000	Cysteine and Methionine Metabolism	2.5.1.6	R00177	rxn00126	METAT; SAM1; SAM2	S-ADENMETSYN-RXN	MNXR101407	21081	extract from iCC541
45	r_0045	SBO:0000176	6-hydroxymethyl-dihydropterin pyrophosphokinase	atp[c] + 6hmhpt[c] <=> amp[c] + 6hmhptpp[c]	TRUE	AB395_RS08170	-1000	1000	Folate Biosynthesis	2.7.6.3	R03503	rxn02503	HPPKm	H2PTERIDINEPYROPHOSPHOKIN-RXN	MNXR100694	11413	extract from iCC541
46	r_0046	SBO:0000176	L-threonine deaminase	thr__L[c] -> h[c] + nh3[c] + 2obut[c]	FALSE	AB395_RS28905 or AB395_RS13040 or AB395_RS20530 or AB395_RS07065 or AB395_RS28780	0	1000	Glycine, Serine, and Threonine Metabolism	4.3.1.19	R00996	rxn00737	CHA1_1; ILV1; THRD_L; THRD_Lm; THRD_Lr	THREDEHYD-RXN	MNXR104714	22109	extract from iCC541
47	r_0047	SBO:0000176	6r5au butanedionetransferase (R04457)	6r5au[c] + db4p[c] <=> h[c] + 2 h2o[c] + pi[c] + dmlz[c]	TRUE	AB395_RS04350	-1000	1000	Riboflavin Metabolism	2.5.1.78	R04457	[]	RIB5	LUMAZINESYN-RXN	MNXR116032	26152	extract from iCC541
48	r_0048	SBO:0000176	N-ribosylnicotinamide ribohydrolase	h2o[c] + rnam[c] -> h[c] + ncam[c] + rib__D[c]	FALSE	AB395_RS00265	0	1000	Sulfur Metabolism; Purine Metabolism	3.2.2.1	R01273	[]	[]	RXN-8441	MNXR106899	30746	extract from iCC541
49	r_0049	SBO:0000176	3-hydroxyacyl-[acyl-carrier-protein] dehydratase (n-C6:0)	3hhexACP[c] -> h2o[c] + thex2eACP[c]	FALSE	AB395_RS19525 or AB395_RS06100 or AB395_RS08935	0	1000	Sulfur Metabolism; Purine Metabolism	4.2.1.59	R04954	rxn05330	3HAD60; HHYHL2	[]	[]	[]	extract from iCC541
50	r_0050	SBO:0000185	Nitrogen diffusion	n2[e] <=> n2[c]	TRUE	spontaneous	-1000	1000	Alanine, Aspartate and Glutamate metabolism; Pyrimidine Metabolism	[]	[]	rxn10577	[]	[]	[]	[]	extract from iCC541
51	r_0051	SBO:0000176	dihydroorotase	h2o[c] + dhor__S[c] <=> h[c] + cbasp[c]	TRUE	AB395_RS05045 and AB395_RS00565	-1000	1000	Sulfur Metabolism; Purine Metabolism	3.5.2.3	R01993	rxn01465	DH or TS; DHORTS; DHORTSn; URA4	DIHYDROOROT-RXN	MNXR97428	24299	extract from iCC541
52	r_0052	SBO:0000176	3-hydroxyacyl-CoA dehydratase (3-hydroxybutanoyl-CoA)	3hbcoa[c] <=> h2o[c] + b2coa[c]	TRUE	AB395_RS28305 or AB395_RS20255 or AB395_RS11485 or AB395_RS04705	-1000	1000	Alanine, Aspartate and Glutamate metabolism; Pyrimidine Metabolism	4.2.1.17	R03026	rxn02167	ECOAH1	RXN-11667	MNXR97883	26561	extract from iCC541
53	r_0053	SBO:0000176	dihydropyrimidinase (dihydrothymine)	h2o[c] + 56dthm[c] -> h[c] + 3uib[c]	FALSE	AB395_RS12295	0	1000	Pyrimidine Metabolism	3.5.2.2	R03055	rxn02190	DHPM2	RXN-11211	MNXR116784	[]	extract from iCC541
54	r_0054	SBO:0000176	pyridoxine 5-phosphate oxidase	o2[c] + pdx5p[c] <=> pydx5p[c] + h2o2[c]	TRUE	AB395_RS26815 or AB395_RS02675	-1000	1000	Vitamin B6 Metabolism	1.4.3.5	R00278	rxn00209	PDX3_2; PDX5PO; PDX5POi	PNPOXI-RXN	MNXR102438	15150	extract from iCC541
55	r_0055	SBO:0000176	Adenosyl cobinamide kinase	atp[c] + adocbi[c] -> h[c] + adp[c] + adocbip[c]	FALSE	AB395_RS12215	0	1000	Valine, Leucine and Isoleucine Degradation	2.7.1.156	R05221	rxn03536	ADCOBAK; ADOCBIK	COBINAMIDEKIN-RXN	MNXR95465	15769	extract from iCC541
56	r_0056	SBO:0000176	pyruvate kinase	adp[c] + pep[c] -> atp[c] + pyr[c]	FALSE	AB395_RS15210	0	1000	Valine, Leucine and Isoleucine Degradation	2.7.1.40	R00200	rxn00148	CDC19; PYK; PYK2	PEPDEPHOS-RXN	MNXR103371	18157	extract from iCC541
57	r_0057	SBO:0000176	homoserine O-succinyltransferase	hom__L[c] + succoa[c] -> coa[c] + suchms[c]	FALSE	AB395_RS17015	0	1000	Cysteine and Methionine Metabolism	2.3.1.46	R01777	rxn01304	HSST; HSSTr	HOMSUCTRAN-RXN	MNXR100741	22009	extract from iCC541
58	r_0058	SBO:0000176	2C-methyl-D-erythritol 2,4 cyclodiphosphate dehydratase	h[c] + nadh[c] + 2mecdp[c] -> h2o[c] + nad[c] + h2mb4p[c]	FALSE	AB395_RS17575	0	1000	Terpenoid Backbone Biosynthesis	[]	[]	rxn05293	[]	[]	[]	[]	extract from iCC541
59	r_0059	SBO:0000176	imidazolonepropionase	h2o[c] + 4izp[c] -> nflgln[c]	FALSE	AB395_RS24900	0	1000	Histidine Metabolism	3.5.2.7	R02288	rxn01642	IZPN	IMIDAZOLONEPROPIONASE-RXN	MNXR100896	23663	extract from iCC541
60	r_0060	SBO:0000176	shikimate kinase	atp[c] + skm[c] -> adp[c] + skm5p[c]	FALSE	AB395_RS14140	0	1000	Phenylalanine Tyrosine Tryptophan Biosynthesis	2.7.1.71	R02412	rxn01739	ARO1_4; SHKK	SHIKIMATE-KINASE-RXN	MNXR104379	13124	extract from iCC541
61	r_0061	SBO:0000176	ornithine transacetylase	glu__L[c] + acorn[c] <=> acglu[c] + orn[c]	TRUE	AB395_RS03980	-1000	1000	Arginine biosynthesis	2.3.1.35	R02282	rxn01636	[]	GLUTAMATE-N-ACETYLTRANSFERASE-RXN	MNXR102221	15350	extract from iCC541
62	r_0062	SBO:0000176	Threonine Aldolase	thr__L[c] <=> gly[c] + acald[c]	TRUE	AB395_RS28890	-1000	1000	Glycine, Serine, and Threonine Metabolism	4.1.2.5	R00751	rxn00541	GLY1; THRA; THRA2; THRAi; THRAr	THREONINE-ALDOLASE-RXN	MNXR104833	19626	extract from iCC541
63	r_0063	SBO:0000176	3-hydroxyacyl-CoA dehydrogenase (3-oxooctanoyl-CoA)	nad[c] + 3hocoa[c] <=> h[c] + nadh[c] + 3oocoa[c]	TRUE	AB395_RS12850 or AB395_RS29085	-1000	1000	Fatty Acid Metabolism	1.1.1.35	R04745	rxn03246	HACD3; HACD3i	RXN-14275	MNXR118593	31196	extract from iCC541
64	r_0064	SBO:0000176	chorismate synthase	3psme[c] -> h[c] + pi[c] + chor[c]	FALSE	AB395_RS02705	0	1000	Phenylalanine Tyrosine Tryptophan Biosynthesis	4.2.3.5	R01714	rxn01255	ARO2; CH or S; CHORS	CHORISMATE-SYNTHASE-RXN	MNXR96709	21021	extract from iCC541
65	r_0065	SBO:0000176	glutamate 5-kinase	atp[c] + h[c] + glu__L[c] <=> adp[c] + glu5p[c]	FALSE	AB395_RS17070	-1000	1000	Arginine and Proline Metabolism	2.7.2.11	R00239	rxn00179	GLU5K	GLUTKIN-RXN	MNXR100277	14878	extract from iCC541
66	r_0066	SBO:0000176	adenylate kinase	atp[c] + amp[c] <=> 2 adp[c]	TRUE	AB395_RS05430	-1000	1000	Purine Metabolism	2.7.4.3	R00127	rxn00097	ADK1; ADK1_1; ADK1m; ADK2_1	ADENYL-KIN-RXN	MNXR95450	12973	extract from iCC541
67	r_0067	SBO:0000176	acid phosphatase (FMN)	h2o[c] + fmn[c] -> h[c] + pi[c] + ribflv[c]	FALSE	[]	0	1000	Riboflavin Metabolism	3.1.3.2	R00548	rxn00391	ACP1(FMN); ACP1_FMN; ACP1_FMN_; ACP1e; PHO11	RXN0-5187	MNXR95393	35588	extract from iCC541
68	r_0068	SBO:0000176	pyridoxamine kinase	atp[c] + pydam[c] -> adp[c] + pyam5p[c]	FALSE	AB395_RS22130 or AB395_RS02775 or AB395_RS28815 or AB395_RS28815	0	1000	Vitamin B6 Metabolism	2.7.1.35	R02493	rxn01807	PYDAMK; U82	PYRAMKIN-RXN	MNXR103357	25105	extract from iCC541
69	r_0069	SBO:0000176	uracil phosphoribosyltransferase (r)	ura[c] + prpp[c] <=> ppi[c] + ump[c]	TRUE	AB395_RS18645	-1000	1000	Pyrimidine Metabolism	2.4.2.9	R00966	rxn00711	FUR1; UPPRT; UPPRTr	URACIL-PRIBOSYLTRANS-RXN	MNXR105142	13017	extract from iCC541
70	r_0070	SBO:0000176	glucose-6-phosphate isomerase	g6p[c] <=> f6p[c]	TRUE	AB395_RS00585	-1000	1000	Glycolysis / Gluconeogenesis	5.3.1.9	R00771	rxn00558	PGI; PGI1_1	PGLUCISOM-RXN	MNXR102535	11819	extract from iCC541
71	r_0071	SBO:0000176	gamma-glutamylcysteine synthetase	atp[c] + glu__L[c] + cys__L[c] -> h[c] + pi[c] + adp[c] + glucys[c]	FALSE	AB395_RS02025	0	1000	Glutathione Metabolism	6.3.2.2	R00894	rxn00646	GLUCYS; GLUCYSL; GSH1	GLUTCYSLIG-RXN	MNXR100074	13286	extract from iCC541
72	r_0072	SBO:0000176	purine-nucleoside phosphorylase (Guanosine)	h[c] + pi[c] + gsn[c] <=> gua[c] + r1p[c]	TRUE	AB395_RS18630	-1000	1000	Purine Metabolism	2.4.2.1	R02147	rxn01548	PNP1_11; PNP1_8; PUNP3; PUNP3m; U104	RXN0-5199	MNXR103345	13236	extract from iCC541
73	r_0073	SBO:0000176	histidinol-phosphate transaminase reversible	glu__L[c] + imacp[c] <=> akg[c] + hisp[c]	TRUE	AB395_RS31140	-1000	1000	Histidine Metabolism	2.6.1.9	R03243	rxn02320	HIS5; HSTPT; HSTPTr	HISTAMINOTRANS-RXN	MNXR95852	23747	extract from iCC541
74	r_0074	SBO:0000176	2-dehydropantoate 2-reductase	h[c] + nadph[c] + 2dhp[c] <=> nadp[c] + pant__R[c]	TRUE	AB395_RS09805	-1000	1000	Pantothenate and CoA Biosynthesis	1.1.1.169	R02472	rxn01790	DPR; DPRm; ILV5_3; PAN5	2-DEHYDROPANTOATE-REDUCT-RXN	MNXR97779	16235	extract from iCC541
75	r_0075	SBO:0000176	phosphoribosylglycinamide synthetase	atp[c] + gly[c] + pram[c] -> h[c] + pi[c] + adp[c] + gar[c]	FALSE	AB395_RS02495	0	1000	Purine Metabolism	6.3.4.13	R04144	rxn02895	ADE5_7_1; PRAGS; PRAGSr	GLYRIBONUCSYN-RXN	MNXR103139	17453	extract from iCC541
76	r_0076	SBO:0000176	3-oxoacyl-[acyl-carrier-protein] synthase (n-C16:0)	h[c] + myrsACP[c] + malACP[c] -> co2[c] + ACP[c] + 3opalmACP[c]	FALSE	AB395_RS19520 or AB395_RS03995 or AB395_RS08925 or AB395_RS08930	0	1000	Fatty Acid Biosynthesis	2.3.1.41; 2.3.1.179	R04968	rxn05344	CEM1_7; FAS2_7_1; MCMAT7	RXN-9539	MNXR109257	[]	extract from iCC541
77	r_0077	SBO:0000176	IMP dehydrogenase	h2o[c] + nad[c] + imp[c] -> h[c] + nadh[c] + xmp[c]	FALSE	AB395_RS01985	0	1000	Purine Metabolism	1.1.1.205	R01130	rxn00834	FUN63; IMD3; IMD4; IMPD; PUR5; YAR075W	IMP-DEHYDROG-RXN	MNXR100830	11711	extract from iCC541
78	r_0078	SBO:0000176	isopentenyl-diphosphate:ferredoxin oxidoreductase	2 h[c] + 2 fdxrd[c] + h2mb4p[c] <=> h2o[c] + 2 fdxox[c] + ipdp[c]	TRUE	AB395_RS02770	-1000	1000	Terpenoid Backbone Biosynthesis	1.17.1.4	R05884	rxn04113	[]	ISPH2-RXN	MNXR109914	24490	extract from iCC541
79	r_0079	SBO:0000176	nucleoside-diphosphate kinase (ATP:dUDP)	atp[c] + dudp[c] <=> adp[c] + dutp[c]	TRUE	AB395_RS04100	-1000	1000	Pyrimidine Metabolism	2.7.4.6	R02331	rxn01678	NDPK6; YNK1_4	DUDPKIN-RXN	MNXR101938	28583	extract from iCC541
80	r_0080	SBO:0000176	nucleoside-diphosphate kinase (ATP:CDP)	atp[c] + cdp[c] <=> adp[c] + ctp[c]	TRUE	AB395_RS04100	-1000	1000	Pyrimidine Metabolism	2.7.4.6	R00570	rxn00409	NDPK3; YNK1_2	CDPKIN-RXN	MNXR101936	25238	extract from iCC541
81	r_0081	SBO:0000176	tyrosine transaminase	tyr__L[c] + akg[c] <=> glu__L[c] + 34hpp[c]	TRUE	AB395_RS11175 or AB395_RS17670 or AB395_RS14065 or AB395_RS03580 or AB395_RS17570 or AB395_RS19905	-1000	1000	Phenylalanine Tyrosine Tryptophan Biosynthesis	2.6.1.1 or 2.6.1.5 or 2.6.1.9	R00734	rxn00527	AAT1_2; AAT2_2; ARO8; ARO9_2; TYRTA; TYRTAi; TYRTAim; TYRTAip; TYRTAm; TYRTAp	TYROSINE-AMINOTRANSFERASE-RXN	MNXR105000	15096	extract from iCC541
82	r_0082	SBO:0000176	ferrochelatase	fe2[c] + ppp9[c] <=> 2 h[c] + pheme[c]	TRUE	AB395_RS15290	-1000	1000	Porphyrin and Chlorophyll Metabolism	4.98.1.1	R00310	rxn00224	FCLT; FCLTm	PROTOHEMEFERROCHELAT-RXN	MNXR99471	22584	extract from iCC541
83	r_0083	SBO:0000176	ketol-acid reductoisomerase (2,3-dihydroxy-3-methylbutanoate)	nadp[c] + 23dhmb[c] <=> h[c] + nadph[c] + alac__S[c]	TRUE	AB395_RS09805	-1000	1000	Valine, Leucine and Isoleucine Biosynthesis	1.1.1.86	R03051	rxn02186	[]	[]	[]	[]	extract from iCC541
84	r_0084	SBO:0000176	3-hydroxyacyl-CoA dehydratase (3-hydroxyhexadecanoyl-CoA)	3hhdcoa[c] <=> h2o[c] + hdd2coa[c]	TRUE	AB395_RS20255 or AB395_RS28305 or AB395_RS11485 or AB395_RS04705	-1000	1000	Fatty Acid Metabolism	4.2.1.17	R04738	rxn03240	ECOAH7; ECOAH7p	RXN-14272	MNXR97892	31165	extract from iCC541
85	r_0085	SBO:0000176	3,4-Dihydroxy-2-butanone-4-phosphate synthase	ru5p__D[c] <=> h[c] + for[c] + db4p[c]	TRUE	AB395_RS25330	-1000	1000	Riboflavin Metabolism	4.1.99.12	R07281	rxn05040	DB4PS; U79	DIOHBUTANONEPSYN-RXN	MNXR115845	18458	extract from iCC541
86	r_0086	SBO:0000176	N-acetylglutamate synthase	glu__L[c] + accoa[c] -> h[c] + coa[c] + acglu[c]	FALSE	AB395_RS05100	0	1000	Arginine biosynthesis	2.3.1.1	R00259	rxn00192	ACGS; ACGSm; ECM40_1	N-ACETYLTRANSFER-RXN	MNXR95259	24295	extract from iCC541
87	r_0087	SBO:0000176	2-isopropylmalate synthase	h2o[c] + accoa[c] + 3mob[c] -> h[c] + coa[c] + 3c3hmp[c]	FALSE	AB395_RS11595	0	1000	Valine, Leucine and Isoleucine Biosynthesis	2.3.3.13	R01213	rxn00902	IPPS; IPPSm; LEU4	2-ISOPROPYLMALATESYN-RXN	MNXR100879	21525	extract from iCC541
88	r_0088	SBO:0000176	Erythrose 4-phosphate dehydrogenase	h2o[c] + nad[c] + e4p[c] <=> 2 h[c] + nadh[c] + 4per[c]	TRUE	[]	-1000	1000	Vitamin B6 Metabolism	1.2.1.72	R01825	rxn01331	E4PD	ERYTH4PDEHYDROG-RXN	MNXR97842	12057	extract from iCC541
89	r_0089	SBO:0000176	prephenate dehydratase	h[c] + pphn[c] <=> h2o[c] + co2[c] + phpyr[c]	TRUE	AB395_RS19390	-1000	1000	Phenylalanine Tyrosine Tryptophan Biosynthesis	4.2.1.51	R01373	rxn01000	PHA2; PPNDH	PREPHENATEDEHYDRAT-RXN	MNXR126086	21651	extract from iCC541
90	r_0090	SBO:0000176	Ornithine Decarboxylase	h[c] + orn[c] -> co2[c] + ptrc[c]	FALSE	AB395_RS14000	0	1000	Arginine and Proline Metabolism	4.1.1.17	R00670	rxn00470	or NDC	ORNDECARBOX-RXN	MNXR102209	22965	extract from iCC541
91	r_0091	SBO:0000176	beta-ketoacyl-ACP synthase	h[c] + malACP[c] + acACP[c] -> co2[c] + ACP[c] + actACP[c]	FALSE	AB395_RS19520 or AB395_RS03995 or AB395_RS08925 or AB395_RS08930	0	1000	Fatty Acid Biosynthesis	2.3.1.41; 2.3.1.179	R04355	rxn05347	ACMAT1; CEM1_1; FAS2_1_1; KAS14	3-OXOACYL-ACP-SYNTH-BASE-RXN	MNXR100912	[]	extract from iCC541
92	r_0092	SBO:0000185	L-glutamate transport via proton symport, reversible	h[e] + glu__L[e] <=> h[c] + glu__L[c]	TRUE	AB395_RS05970 and AB395_RS05965 and AB395_RS05960 and AB395_RS05955	-1000	1000	Transport	[]	[]	[]	[]	[]	[]	[]	extract from iCC541
93	r_0093	SBO:0000185	Cytosolic source for myo-inositol	inost[c] <=> inost[e]	TRUE	AB395_RS21890	-1000	1000	Transport	[]	[]	[]	[]	[]	[]	[]	extract from iCC541
94	r_0094	SBO:0000176	succinyl-CoA synthetase (ADP-forming)	atp[c] + coa[c] + succ[c] <=> pi[c] + adp[c] + succoa[c]	TRUE	AB395_RS12935 and ( AB395_RS28695 or AB395_RS12930 )	-1000	1000	Sulfur Metabolism; Purine Metabolism	6.2.1.5	R00405	rxn00285	LSC2; SUCOAS; SUCOAS1m; SUCOASm	SUCCCOASYN-RXN	MNXR104635	17664	extract from iCC541
95	r_0095	SBO:0000176	succinate dehydrogenase	succ[c] + fad[c] <=> fum[c] + fadh2[c]	TRUE	AB395_RS16880 and AB395_RS16885 and AB395_RS16890 and AB395_RS16895	-1000	1000	TCA Cycle	1.3.5.1	R00408	rxn00288	FRD; FRDSUCD1i; FRDm; OSM1; SDH3_1; SUCD1; SUCD1i; SUCD1m	[]	[]	[]	extract from iCC541
96	r_0096	SBO:0000176	RNA(ADD)	2.6 atp[c] + 1.6 h2o[c] + gtp[c] + ctp[c] + utp[c] -> 1.6 h[c] + 4 ppi[c] + 1.6 pi[c] + 1.6 adp[c] + 4 rna[c]	FALSE	AB395_RS05445	0	1000	Pyrimidine Metabolism	2.7.7.6	[]	[]	[]	[]	[]	[]	extract from iCC541
97	r_0097	SBO:0000176	triose-phosphate isomerase	dhap[c] <=> g3p[c]	TRUE	AB395_RS12820 or AB395_RS21280	-1000	1000	Glycolysis / Gluconeogenesis	5.3.1.1	R01015	rxn00747	TPI	TRIOSEPISOMERIZATION-RXN	MNXR104918	18588	extract from iCC541
98	r_0098	SBO:0000176	guanylate kinase (GMP:ATP)	atp[c] + gmp[c] <=> adp[c] + gdp[c]	TRUE	AB395_RS04015	-1000	1000	Purine Metabolism	2.7.4.8	R00332	rxn00239	GK1; GUK1_1	GUANYL-KIN-RXN	MNXR100144	20780	extract from iCC541
99	r_0099	SBO:0000176	homocysteine S-methyltransferase	hcys__L[c] + amet[c] -> h[c] + ahcys[c] + met__L[c]	FALSE	AB395_RS03220 or AB395_RS27740	0	1000	Cysteine and Methionine Metabolism	2.1.1.13	R00650	rxn00452	HCYSMT; MHT1; SAM4	HOMOCYSTEINE-S-METHYLTRANSFERASE-RXN	MNXR100577	21821	extract from iCC541
100	r_0100	SBO:0000176	nucleoside-diphosphate kinase (ATP:dGDP)	atp[c] + dgdp[c] <=> dgtp[c] + adp[c]	TRUE	AB395_RS04100	-1000	1000	Purine Metabolism	2.7.4.6	R01857	rxn01353	NDPK5; YNK1_3	DGDPKIN-RXN	MNXR96118	27691	extract from iCC541
101	r_0101	SBO:0000176	adenylosuccinate lyase	25aics[c] <=> fum[c] + aicar[c]	TRUE	AB395_RS07505	-1000	1000	Purine Metabolism	4.3.2.2	R04559	rxn03136	ADE13_1; ADSL2; ADSL2r	AICARSYN-RXN	MNXR108966	23923	extract from iCC541
102	r_0102	SBO:0000176	3-deoxy-D-arabino-heptulosonate 7-phosphate synthetase	h2o[c] + pep[c] + e4p[c] <=> h[c] + pi[c] + 2dda7p[c]	FALSE	AB395_RS29185	-1000	1000	Phenylalanine Tyrosine Tryptophan Biosynthesis	2.5.1.54	R01826	rxn01332	ARO3; ARO4; DAHPS; DDPA; DDPAm	DAHPSYN-RXN	MNXR97218	14720	extract from iCC541
103	r_0103	SBO:0000176	histidinol dehydrogenase	h2o[c] + 2 nad[c] + histd[c] -> 3 h[c] + 2 nadh[c] + his__L[c]	FALSE	AB395_RS01195 or AB395_RS18720 or AB395_RS28225 or AB395_RS06405	0	1000	Histidine Metabolism	1.1.1.23	R01158	rxn00859	HIS4_3; HISTD	RXN-8001	MNXR100587	20641	extract from iCC541
104	r_0104	SBO:0000176	nucleoside-diphosphatase (dUDP)	h2o[c] + dutp[c] -> ppi[c] + dump[c]	FALSE	AB395_RS20125	0	1000	Pyrimidine Metabolism	3.6.1.23	R02100	rxn01519	DUT1; DUTPDP	DUTP-PYROP-RXN	MNXR97822	10249	extract from iCC541
105	r_0105	SBO:0000176	acetylglutamate kinase	atp[c] + h[c] + acglu[c] -> adp[c] + acg5p[c]	FALSE	AB395_RS00385	0	1000	Arginine biosynthesis	2.7.2.8	R02649	rxn01917	ACGK; ACGKm	ACETYLGLUTKIN-RXN	MNXR95256	14632	extract from iCC541
106	r_0106	SBO:0000176	nicotinate-nucleotide adenylyltransferase	atp[c] + nicrnt[c] <=> ppi[c] + dnad[c]	TRUE	AB395_RS17080 or AB395_RS24490	-1000	1000	Nicotinate and Nicotinamide	2.7.7.18	R03005	rxn02155	NNAT; NNATm; NNATr; YLR328W_1; YLR328W_2	NICONUCADENYLYLTRAN-RXN	MNXR101978	22861	extract from iCC541
107	r_0107	SBO:0000176	acetolactate synthase	pyr[c] + 2ahethmpp[c] -> alac__S[c] + thmpp[c]	FALSE	AB395_RS10030 and AB395_RS10035	0	1000	Valine, Leucine and Isoleucine Biosynthesis	2.2.1.6	R04672	rxn00000	[]	RXN-14037	MNXR95883	24808	extract from iCC541
108	r_0108	SBO:0000176	purine-nucleoside phosphorylase (Inosine)	h[c] + pi[c] + ins[c] <=> r1p[c] + hxan[c]	TRUE	AB395_RS18630	-1000	1000	Purine Metabolism	2.4.2.1	R01863	rxn01358	PNP1_6; PUNP5	INOPHOSPHOR-RXN	MNXR103347	27649	extract from iCC541
109	r_0109	SBO:0000176	histidase	his__L[c] -> h[c] + nh3[c] + urcan[c]	FALSE	AB395_RS24905 or AB395_RS14245	0	1000	Histidine Metabolism	4.3.1.3	R01168	rxn00867	HISD; HISD1; HISD1i; HISD1r; HISDr	HISTIDINE-AMMONIA-LYASE-RXN	MNXR100639	21233	extract from iCC541
110	r_0110	SBO:0000176	pyridoxine kinase	atp[c] + pydxn[c] -> adp[c] + pdx5p[c]	FALSE	AB395_RS28815 or AB395_RS02775 or AB395_RS22130	0	1000	Vitamin B6 Metabolism	2.7.1.35	R01909	rxn01396	PYDXNK; U81	PNKIN-RXN	MNXR103362	25109	extract from iCC541
111	r_0111	SBO:0000176	pyrophosphate phosphoribosyltransferase	prpp[c] + xan[c] <=> ppi[c] + xmp[c]	TRUE	AB395_RS07020	-1000	1000	Purine Metabolism	2.4.2.8 or 2.4.2.22	R02142	rxn01544	XPPT; XPT1	XANPRIBOSYLTRAN-RXN	MNXR105243	10802	extract from iCC541
112	r_0112	SBO:0000185	succinate transport via proton symport (2 H)	2 h[e] + succ[e] -> 2 h[c] + succ[c]	FALSE	AB395_RS21160	0	1000	Transport	[]	[]	rxn10154	[]	[]	[]	[]	extract from iCC541
113	r_0113	SBO:0000176	L-alanine dehydrogenase	h2o[c] + nad[c] + ala__L[c] <=> 2 h[c] + nh3[c] + nadh[c] + pyr[c]	TRUE	AB395_RS07090	-1000	1000	Sulfur Metabolism; Purine Metabolism	1.4.1.1	R00396	rxn00278	ALAD_L	ALANINE-DEHYDROGENASE-RXN	MNXR95687	18408	extract from iCC541
114	r_0114	SBO:0000176	purine-nucleoside phosphorylase (Deoxyadenosine)	h[c] + pi[c] + dad_2[c] <=> 2dr1p[c] + ade[c]	TRUE	AB395_RS18630	-1000	1000	Purine Metabolism	2.4.2.1	R02557	rxn01859	PNP1_4; PUNP2	DEOXYADENPHOSPHOR-RXN	MNXR103344	27745	extract from iCC541
115	r_0115	SBO:0000176	ornithine transaminase reversible	akg[c] + orn[c] <=> glu__L[c] + glu5sa[c]	TRUE	[]	-1000	1000	Arginine and Proline Metabolism	2.6.1.13	R00667	rxn00467	[]	ORNITHINE-GLU-AMINOTRANSFERASE-RXN	MNXR102220	25160	extract from iCC541
116	r_0116	SBO:0000176	Dihydroneopterin dephosphorylase	3 h2o[c] + ahdt[c] -> 3 h[c] + 3 pi[c] + dhnpt[c]	FALSE	AB395_RS17180	0	1000	Folate Biosynthesis	3.1.3.1	R04620	rxn03167	AKP1; PHO8	[]	[]	[]	extract from iCC541
117	r_0117	SBO:0000176	diaminopimelate decarboxylase	h[c] + 26dap__M[c] <=> co2[c] + lys__L[c]	TRUE	AB395_RS14000	-1000	1000	Lysine Biosynthesis	4.1.1.20	R00451	rxn00313	DAPDC	DIAMINOPIMDECARB-RXN	MNXR97141	15102	extract from iCC541
118	r_0118	SBO:0000176	ATP deoxyuridine 5 phosphotransferase	atp[c] + duri[c] -> adp[c] + dump[c]	FALSE	AB395_RS11680	0	1000	Pyrimidine Metabolism	2.7.1.21	R02099	rxn01518	DURIK1; U15	DURIDKI-RXN	MNXR97817	28207	extract from iCC541
119	r_0119	SBO:0000185	ammonia reversible transport	nh3[e] <=> nh3[c]	TRUE	spontaneous	-1000	1000	Transport	[]	[]	rxn05466	[]	[]	[]	[]	extract from iCC541
120	r_0120	SBO:0000176	urocanase	h2o[c] + urcan[c] -> 4izp[c]	FALSE	AB395_RS24915	0	1000	Histidine Metabolism	4.2.1.49	R02914	rxn02085	URCN	UROCANATE-HYDRATASE-RXN	MNXR105150	13103	extract from iCC541
121	r_0121	SBO:0000176	pyrimidine phosphatase	5aprbu[c] + h2o[c] <=> 6r5au[c] + pi[c]	TRUE	[]	-1000	1000	Riboflavin Metabolism	3.1.3.104	R07280	[]	U78	RIBOPHOSPHAT-RXN	MNXR96145	25198	extract from iCC541
122	r_0122	SBO:0000176	shikimate dehydrogenase	h[c] + nadph[c] + 3dhsk[c] <=> nadp[c] + skm[c]	TRUE	AB395_RS17960 or AB395_RS29630	-1000	1000	Phenylalanine Tyrosine Tryptophan Biosynthesis	1.1.1.25	R02413	rxn01740	ARO1_3; SHK3D; SHK3Dr	SHIKIMATE-5-DEHYDROGENASE-RXN	MNXR104378	17739	extract from iCC541
123	r_0123	SBO:0000176	asparagine synthase (glutamine-hydrolysing)	atp[c] + h2o[c] + gln__L[c] + asp__L[c] -> ppi[c] + glu__L[c] + amp[c] + asn__L[c]	FALSE	AB395_RS26130	0	1000	Alanine, Aspartate and Glutamate metabolism	6.3.5.4	R00578	rxn00416	ASN1; ASN2; ASNS1	ASNSYNB-RXN	MNXR96059	12229	extract from iCC541
124	r_0124	SBO:0000176	enoyl-[acyl-carrier-protein] reductase (NADH) (n-C14:0)	h[c] + nadh[c] + tmrs2eACP[c] -> nad[c] + myrsACP[c]	FALSE	AB395_RS02690 and AB395_RS19515	0	1000	Fatty Acid Biosynthesis	1.3.1.9; 2.3.1.-	R04966	rxn05323	[]	RXN-9662	MNXR109255	[]	extract from iCC541
125	r_0125	SBO:0000176	transaldolase	g3p[c] + s7p[c] <=> f6p[c] + e4p[c]	TRUE	AB395_RS11385	-1000	1000	Pentose Phosphate Pathway	2.2.1.2	R01827	rxn01333	TAL; TALA	TRANSALDOL-RXN	MNXR104715	17056	extract from iCC541
126	r_0126	SBO:0000176	Isoleucine biosynthesi step i	2obut[c] + 2ahethmpp[c] -> thmpp[c] + 2ahbut[c]	FALSE	AB395_RS05920 or AB395_RS08970	0	1000	Valine, Leucine and Isoleucine Biosynthesis	2.1.1.107	R04673	rxn03194	[]	[]	[]	[]	extract from iCC541
127	r_0127	SBO:0000176	dihydroneopterin aldolase	dhnpt[c] -> 6hmhpt[c] + gcald[c]	FALSE	AB395_RS08175	0	1000	Folate Biosynthesis	4.1.2.25	R03504	rxn02504	DHNPA; DHNPAm	H2NEOPTERINALDOL-RXN	MNXR125603	10541	extract from iCC541
128	r_0128	SBO:0000176	citrate synthase	h2o[c] + accoa[c] + oaa[c] -> h[c] + coa[c] + cit[c]	FALSE	AB395_RS21690 and AB395_RS06120	0	1000	TCA Cycle	2.3.3.1 or 2.3.3.16	R00351	rxn00256	CIT1; CIT2; CIT3; CS; CSm; CSp	CITSYN-RXN	[]	16846	extract from iCC541
129	r_0129	SBO:0000176	geranyltranstransferase	ipdp[c] + grdp[c] -> ppi[c] + frdp[c]	FALSE	AB395_RS17565	0	1000	Terpenoid Backbone Biosynthesis	2.5.1.10	R02003	rxn01466	GRTT	FPPSYN-RXN	MNXR99634	19361	extract from iCC541
130	r_0130	SBO:0000176	acetyl-CoA C-acyltransferase (butanoyl-CoA)	accoa[c] + btcoa[c] <=> coa[c] + 3ohcoa[c]	TRUE	AB395_RS28300	-1000	1000	Fatty Acid Metabolism	2.3.1.16	R01177	rxn00874	ACACT2r; KAT2; POT1_7	RXN-12565	MNXR95196	31113	extract from iCC541
131	r_0131	SBO:0000176	phosphoribosylaminoimidazolesuccinocarboxamide synthase	atp[c] + asp__L[c] + 5aizc[c] <=> 2 h[c] + pi[c] + adp[c] + 25aics[c]	TRUE	AB395_RS04210	-1000	1000	Purine Metabolism	6.3.2.6	R04591	rxn03147	ADE1; PRASCS	SAICARSYN-RXN	MNXR108987	22628	extract from iCC541
132	r_0132	SBO:0000176	glutamine synthetase	atp[c] + glu__L[c] + nh3[c] -> gln__L[c] + pi[c] + adp[c]	FALSE	AB395_RS01700 or AB395_RS10505 or AB395_RS21835 or AB395_RS07005 or AB395_RS27410	0	1000	Nitrogen Metabolism	6.3.1.2	R00253	rxn00187	GLN1; GLNS; GLNS_i	GLUTAMINESYN-RXN	MNXR100024	16169	extract from iCC541
133	r_0133	SBO:0000176	Malonyl-CoA-ACP transacylase	ACP[c] + malcoa[c] <=> coa[c] + malACP[c]	TRUE	AB395_RS03980	-1000	1000	Fatty Acid Biosynthesis	2.3.1.39	R01626	rxn05465	FAS1_1; MCOATA; MCOATAm; MCT1	MALONYL-COA-ACP-TRANSACYL-RXN	MNXR101421	[]	extract from iCC541
134	r_0134	SBO:0000176	5-dehydro-2-deoxyphosphogluconate aldolase	d5kgp[c] -> dhap[c] + msa[c]	FALSE	[]	0	1000	Inositol Phosphate Metabolism	4.1.2.29	R05378	rxn01176	D5KGPA; R05378	4.1.2.29-RXN	MNXR97072	13178	extract from iCC541
135	r_0135	SBO:0000176	Imidazole-glycerol-3-phosphate synthase	gln__L[c] + prlp[c] -> h[c] + glu__L[c] + aicar[c] + eig3p[c]	FALSE	AB395_RS18210 and AB395_RS18220	0	1000	Histidine Metabolism	4.3.2.10	R04558	rxn03135	IG3PS	GLUTAMIDOTRANS-RXN	MNXR100811	24793	extract from iCC541
136	r_0136	SBO:0000176	3-hydroxyacyl-CoA dehydrogenase (3-oxododecanoyl-CoA)	nad[c] + 3hddcoa[c] <=> h[c] + nadh[c] + 3oddcoa[c]	TRUE	AB395_RS12850 or AB395_RS29085	-1000	1000	Fatty Acid Metabolism	1.1.1.35	R04741	rxn03242	HACD5; HACD5i; HACD5p	[]	[]	[]	extract from iCC541
137	r_0137	SBO:0000176	Dihydroxy-acid dehydratase (2,3-dihydroxy-3-methylpentanoate)	23dhmp[c] -> h2o[c] + 3mop[c]	FALSE	AB395_RS15445 and AB395_RS21035	0	1000	Valine, Leucine and Isoleucine Biosynthesis	4.2.1.9	R05070	rxn03437	DHAD2; DHAD2m; ILV3_3	DIHYDROXYMETVALDEHYDRAT-RXN	MNXR97359	27695	extract from iCC541
138	r_0138	SBO:0000176	sulphur atom for Fe–S cluster biogenesis	cys__L[c] -> s[c] + ala__L[c]	FALSE	AB395_RS07630	0	1000	Sulfur Metabolism; Symbiosis	2.8.1.7	[]	[]	[]	[]	[]	[]	extract from iCC541
139	r_0139	SBO:0000176	3-oxoacyl-[acyl-carrier-protein] reductase (n-C12:0)	h[c] + nadph[c] + 3oddecACP[c] <=> nadp[c] + 3hddecACP[c]	TRUE	AB395_RS09750 and AB395_RS03985 and AB395_RS16655 and AB395_RS27030	-1000	1000	Fatty Acid Biosynthesis	1.1.1.100	R04964	rxn05340	3OAR120; HDDR5	[]	[]	[]	extract from iCC541
140	r_0140	SBO:0000176	acetyl-CoA C-acetyltransferase	2 accoa[c] <=> aacoa[c] + coa[c]	TRUE	AB395_RS17540 or AB395_RS16005	-1000	1000	Fatty Acid Metabolism	2.3.1.9 or 2.3.1.16	R00238	rxn00178	AACOAT; ACACT1; ACACT1m; ACACT1r; ERG10; KAT1	ACETYL-COA-ACETYLTRANSFER-RXN	MNXR95194	21039	extract from iCC541
141	r_0141	SBO:0000176	porphobilinogen synthase	2 5aop[c] -> h[c] + 2 h2o[c] + ppbng[c]	FALSE	AB395_RS04315	0	1000	Porphyrin and Chlorophyll Metabolism	4.2.1.24	R00036	rxn00029	HEM2; PPBNGS	PORPHOBILSYNTH-RXN	MNXR103095	24064	extract from iCC541
142	r_0142	SBO:0000176	phosphoglycerate kinase	atp[c] + h[c] + 3pg[c] <=> adp[c] + 13dpg[c]	TRUE	AB395_RS15050	-1000	1000	Glycolysis / Gluconeogenesis	2.7.2.3	R01512	rxn01100	PGK; PGK1	PHOSGLYPHOS-RXN	MNXR102538	14804	extract from iCC541
143	r_0143	SBO:0000176	anthranilate phosphoribosyltransferase	prpp[c] + anth[c] -> ppi[c] + pran[c]	FALSE	AB395_RS06930	0	1000	Phenylalanine Tyrosine Tryptophan Biosynthesis	2.4.2.18	R01073	rxn00791	ANPRT; TRP4	PRTRANS-RXN	MNXR95842	11771	extract from iCC541
144	r_0144	SBO:0000176	acetate kinase	atp[c] + h[c] + ac[c] <=> adp[c] + actp[c]	TRUE	AB395_RS24635	-1000	1000	Glycolysis / Gluconeogenesis	2.7.2.1	R00315	rxn00225	ACKr	ACETATEKIN-RXN	MNXR95269	11355	extract from iCC541
145	r_0145	SBO:0000176	5-Methylcytosine aminohydrolase	h2o[c] + 5mcsn[c] -> nh3[c] + thym[c]	FALSE	AB395_RS23710	0	1000	Pyrimidine Metabolism	3.5.2.3	R01411	rxn01025	MCSNAH1r	RXN-14197	MNXR101425	30762	extract from iCC541
146	r_0146	SBO:0000176	inosose dehydratase	2ins[c] <=> h2o[c] + dkdi[c]	TRUE	AB395_RS21275	-1000	1000	Inositol Phosphate Metabolism	4.2.1.44	R02782	rxn02007	2INSD; R05659	MYO-INOSOSE-2-DEHYDRATASE-RXN	MNXR137940	14066	extract from iCC541
147	r_0147	SBO:0000176	3_Ureidoisobutyrate_amidohydrolase_c0	h[c] + h2o[c] + 3uib[c] -> nh3[c] + co2[c] + 3aib__D[c]	FALSE	AB395_RS12290	0	1000	Pyrimidine Metabolism	3.5.1.6	R04666	rxn03188	[]	RXN-11210	MNXR109033	37340	extract from iCC541
148	r_0148	SBO:0000176	3-oxoacyl-[acyl-carrier-protein] synthase (n-C8:0)	h[c] + malACP[c] + hexACP[c] -> co2[c] + ACP[c] + 3ooctACP[c]	FALSE	AB395_RS19520 or AB395_RS03995 or AB395_RS08925 or AB395_RS08930	0	1000	Fatty Acid Biosynthesis	2.3.1.41; 2.3.1.179	R04957	rxn05350	3OAS80; CEM1_3; FAS2_3_1; MCMAT3	RXN-9523	MNXR109248	[]	extract from iCC541
149	r_0149	SBO:0000176	4-aminobutyrate transaminase	akg[c] + 4abut[c] -> glu__L[c] + sucsal[c]	FALSE	AB395_RS28935	0	1000	Nitrogen Metabolism	2.6.1.19	R01648	rxn01204	ABTA; ABTAr; UGA1	GABATRANSAM-RXN	MNXR95186	23355	extract from iCC541
150	r_0150	SBO:0000176	3-oxoacyl-[acyl-carrier-protein] synthase (n-C6:0)	h[c] + malACP[c] + butACP[c] -> co2[c] + ACP[c] + 3ohexACP[c]	FALSE	AB395_RS19520 or AB395_RS03995 or AB395_RS08925 or AB395_RS08930	0	1000	Fatty Acid Biosynthesis	2.3.1.41; 2.3.1.179	R04952	rxn05346	3OAS60; CEM1_2; FAS2_2_1; MCMAT2	RXN-9516	MNXR109245	[]	extract from iCC541
151	r_0151	SBO:0000176	nucleoside-diphosphate kinase (ATP:dTDP)	atp[c] + dtdp[c] <=> adp[c] + dttp[c]	TRUE	AB395_RS04100	-1000	1000	Pyrimidine Metabolism	2.7.4.6	R02093	rxn01512	NDPK4; YNK1_6	DTDPKIN-RXN	MNXR101937	27683	extract from iCC541
152	r_0152	SBO:0000176	transketolase	xu5p__D[c] + e4p[c] <=> g3p[c] + f6p[c]	TRUE	AB395_RS15035	-1000	1000	Pentose Phosphate Pathway	2.2.1.1	R01067	rxn00785	TKT2	[]	[]	[]	extract from iCC541
153	r_0153	SBO:0000176	1-hydroxy-2-methyl-2-(E)-butenyl 4-diphosphate reductase (dmpp)	h[c] + nadh[c] + h2mb4p[c] -> h2o[c] + nad[c] + dmpp[c]	FALSE	AB395_RS02770	0	1000	Terpenoid Backbone Biosynthesis	1.17.7.4	R08210	rxn08352	DMPPS	RXN0-884	MNXR111778	24827	extract from iCC541
154	r_0154	SBO:0000176	N-acetyl-g-glutamyl-phosphate reductase	nadp[c] + pi[c] + acg5sa[c] <=> nadph[c] + acg5p[c]	TRUE	AB395_RS04675	-1000	1000	Arginine biosynthesis	1.2.1.38	R03443	rxn02465	AGPR; AGPRim	N-ACETYLGLUTPREDUCT-RXN	MNXR95530	21591	extract from iCC541
155	r_0155	SBO:0000185	Cob(1)alamin transport via ABC system	atp[c] + h2o[c] + cbl1[e] -> h[c] + pi[c] + adp[c] + cbl1[c]	FALSE	[]	0	1000	Porphyrin and Chlorophyll Metabolism	[]	[]	rxn10147	[]	[]	[]	[]	extract from iCC541
156	r_0156	SBO:0000176	dephospho-CoA kinase	atp[c] + dpcoa[c] -> coa[c] + adp[c]	FALSE	AB395_RS17965	0	1000	Pantothenate and CoA Biosynthesis	2.7.1.24	R00130	rxn00100	DPCOAK; DPCOAKm; U96; U97	DEPHOSPHOCOAKIN-RXN	MNXR97762	18246	extract from iCC541
157	r_0157	SBO:0000176	aconitase (half-reaction B, Isocitrate hydro-lyase)	h2o[c] + acon_C[c] <=> icit[c]	TRUE	AB395_RS27600	-1000	1000	TCA Cycle	4.2.1.3	R01900	rxn01388	ACONTb	ACONITATEHYDR-RXN	MNXR115664	22147	extract from iCC541
158	r_0158	SBO:0000176	ATP maintenance requirement	atp[c] + h2o[c] -> h[c] + pi[c] + adp[c]	FALSE	AB395_RS16785 or AB395_RS17110 or AB395_RS21070	3	1000	Oxidative Phosphorylation	3.6.1.3; 3.6.3.15; 3.6.3.50; 3.6.3.51; 3.6.3.52; 3.6.4.1; 3.6.4.10; 3.6.4.11; 3.6.4.12; 3.6.4.13; 3.6.4.2; 3.6.4.4; 3.6.4.5; 3.6.4.6; 3.6.4.7; 3.6.4.8; 3.6.4.9	R00086	rxn00062	ATPM; ATPOBJ; FATP; NTP1; U214	ATPASE-RXN	MNXR96131	13065	extract from iCC541
159	r_0159	SBO:0000176	cytidine deaminase	h2o[c] + cytd[c] -> nh3[c] + uri[c]	FALSE	AB395_RS18625	0	1000	Pyrimidine Metabolism	3.5.4.5	R01878	rxn01368	CDD1_1; CYTD	CYTIDEAM2-RXN	MNXR97039	16069	extract from iCC541
160	r_0160	SBO:0000176	nicotinate-nucleotide diphosphorylase (carboxylating)	2 h[c] + prpp[c] + quln[c] -> ppi[c] + co2[c] + nicrnt[c]	FALSE	AB395_RS07020	0	1000	Nicotinate and Nicotinamide	2.4.2.19	R03348	rxn02402	NNDPR; NNDPRm; QPT1_1; QPT1_2	QUINOPRIBOTRANS-RXN	MNXR101980	12735	extract from iCC541
161	r_0161	SBO:0000176	dihydrofolate reductase	h[c] + nadph[c] + dhf[c] <=> nadp[c] + thf[c]	TRUE	AB395_RS09230 or AB395_RS13680 or AB395_RS10090 or AB395_RS13870 or AB395_RS01230	-1000	1000	Folate Biosynthesis	1.5.1.3	R00939	rxn00686	DFR1_1; DFR1_2; DHFR; DHFRi; DHFRim	DIHYDROFOLATEREDUCT-RXN	MNXR115841	15011	extract from iCC541
162	r_0162	SBO:0000176	3-hydroxyacyl-[acyl-carrier-protein] dehydratase (n-C16:0)	3hpalmACP[c] -> h2o[c] + tpalm2eACP[c]	FALSE	AB395_RS19525 or AB395_RS06100 or AB395_RS08935	0	1000	Fatty Acid Biosynthesis	4.2.1.59	R04544	rxn05332	3HAD160	[]	[]	[]	extract from iCC541
163	r_0163	SBO:0000176	arginine deiminase	h2o[c] + arg__L[c] <=> h[c] + nh3[c] + citr__L[c]	TRUE	AB395_RS15300	-1000	1000	Arginine biosynthesis	3.5.3.6	R00552	rxn00395	ARGD; ARGDE; ARGDr	ARGININE-DEIMINASE-RXN	MNXR95941	19600	extract from iCC541
164	r_0164	SBO:0000176	1-(5-phosphoribosyl)-5-[(5-phosphoribosylamino)methylideneamino)imidazole-4-carboxamide isomerase (irreversible)	prfp[c] -> prlp[c]	FALSE	AB395_RS18215	0	1000	Histidine Metabolism	5.3.1.16	R04640	rxn03175	PRMICI; PRMICIi	PRIBFAICARPISOM-RXN	MNXR103169	15470	extract from iCC541
165	r_0165	SBO:0000176	dihydropteroate synthase	6hmhptpp[c] + 4abz[c] -> ppi[c] + dhpt[c]	FALSE	AB395_RS08180	0	1000	Folate Biosynthesis	2.5.1.15	R03067	rxn02201	DHPS2; DHPS2FOLD3; FOLD3; FOLD3m; FOLDm	H2PTEROATESYNTH-RXN	MNXR140085	19950	extract from iCC541
166	r_0166	SBO:0000176	6-phosphogluconate dehydratase	6pgc[c] -> h2o[c] + 2ddg6p[c]	FALSE	AB395_RS01680	0	1000	Pentose Phosphate Pathway	4.2.1.12	R02036	rxn01477	EDD; PGDHY	PGLUCONDEHYDRAT-RXN	MNXR97898	17278	extract from iCC541
167	r_0167	SBO:0000176	3-hydroxyacyl-[acyl-carrier-protein] dehydratase (n-C10:0)	3hdecACP[c] -> h2o[c] + tdec2eACP[c]	FALSE	AB395_RS19525 or AB395_RS06100 or AB395_RS08935	0	1000	Fatty Acid Biosynthesis	4.2.1.59	R04535	rxn05333	3HAD100; HDEHL4	[]	[]	[]	extract from iCC541
168	r_0168	SBO:0000176	GTP cyclohydrolase II	3 h2o[c] + gtp[c] <=> h[c] + ppi[c] + for[c] + 25drapp[c]	TRUE	AB395_RS25330	-1000	1000	Riboflavin Metabolism	3.5.4.25	R00425	rxn00300	GTPCII2; RIB1	GTP-CYCLOHYDRO-II-RXN	MNXR100455	23705	extract from iCC541
169	r_0169	SBO:0000176	aspartate kinase, irreversible	atp[c] + h[c] + asp__L[c] -> adp[c] + 4pasp[c]	FALSE	AB395_RS13670	0	1000	Glycine, Serine, and Threonine Metabolism	2.7.2.4	R00480	rxn00337	ASPK; ASPKi; HOM3	ASPARTATEKIN-RXN	MNXR96085	23779	extract from iCC541
170	r_0170	SBO:0000176	acyl-carrier protein synthase	coa[c] + apoACP[c] -> ACP[c] + pap[c]	FALSE	AB395_RS02910 or AB395_RS00605 or AB395_RS00710 or AB395_RS08365 or AB395_RS25515	0	1000	Pantothenate and CoA Biosynthesis	2.7.8.7	R01625	rxn06023	[]	HOLO-ACP-SYNTH-RXN	MNXR107095	12069	extract from iCC541
171	r_0171	SBO:0000176	acetylornithine deacetylase	h2o[c] + acorn[c] -> ac[c] + orn[c]	FALSE	AB395_RS28795 or AB395_RS26765	0	1000	Arginine biosynthesis	3.5.1.16	R00669	rxn00469	[]	ACETYLORNDEACET-RXN	MNXR95377	15944	extract from iCC541
172	r_0172	SBO:0000176	inositol 2-dehydrogenase	nad[c] + inost[c] -> h[c] + nadh[c] + 2ins[c]	FALSE	AB395_RS11960 and AB395_RS12815 and AB395_RS02280 and AB395_RS09770 and AB395_RS02385	0	1000	Inositol Phosphate Metabolism	1.1.1.18	R01183	rxn00879	INS2D	MYO-INOSITOL-2-DEHYDROGENASE-RXN	MNXR100842	16952	extract from iCC541
173	r_0173	SBO:0000176	enoyl-[acyl-carrier-protein] reductase (NADH) (n-C12:0)	h[c] + nadh[c] + tddec2eACP[c] -> nad[c] + ddcaACP[c]	FALSE	AB395_RS02690 and AB395_RS19515	0	1000	Fatty Acid Biosynthesis	1.3.1.9; 2.3.1.-	R04724	rxn05324	DDMAT5; EAR120x	RXN-9661	MNXR109080	[]	extract from iCC541
174	r_0174	SBO:0000176	dihydroxy-acid dehydratase (2,3-dihydroxy-3-methylbutanoate)	23dhmb[c] -> h2o[c] + 3mob[c]	FALSE	AB395_RS21035 or AB395_RS11915 or AB395_RS15445	0	1000	Valine, Leucine and Isoleucine Biosynthesis	4.2.1.9	R01209	rxn00898	[]	[]	[]	[]	extract from iCC541
175	r_0175	SBO:0000176	DNA (cytosine-5-)-methyltransferase	amet[c] + dna[c] -> h[c] + ahcys[c] + dna5mtc[c]	FALSE	[]	0	1000	Cysteine and Methionine Metabolism	2.1.1.37	R00380	[]	DNAMTn2r	DNA-CYTOSINE-5--METHYLTRANSFERASE-RXN	MNXR97535	13682	extract from iCC541
176	r_0176	SBO:0000176	formimidoylglutamase	h2o[c] + nflgln[c] -> glu__L[c] + frmd[c]	FALSE	AB395_RS29810	0	1000	Histidine Metabolism	3.5.3.8	R02285	rxn01639	FGLU	FORMIMINOGLUTAMASE-RXN	MNXR99593	22493	extract from iCC541
177	r_0177	SBO:0000176	diaminopimelate epimerase	26dap_LL[c] <=> 26dap__M[c]	TRUE	AB395_RS17325	-1000	1000	Lysine Biosynthesis	5.1.1.7	R02735	rxn01974	DAPE	DIAMINOPIMEPIM-RXN	MNXR97143	15396	extract from iCC541
178	r_0178	SBO:0000176	ribokinase reversible	atp[c] + rib__D[c] <=> r5p[c] + adp[c]	TRUE	AB395_RS25105 or AB395_RS00280	-1000	1000	Pentose Phosphate Pathway	2.7.1.15	R01051	rxn00772	RBKr	RIBOKIN-RXN	MNXR116251	13698	extract from iCC541
179	r_0179	SBO:0000176	3-oxoacyl-[acyl-carrier-protein] reductase (n-C8:0)	h[c] + nadph[c] + 3ooctACP[c] <=> nadp[c] + 3hoctACP[c]	TRUE	AB395_RS09750 and AB395_RS03985 and AB395_RS16655 and AB395_RS27030	-1000	1000	Fatty Acid Biosynthesis	1.1.1.100	R04536	rxn05341	3OAR80; HOCR3	RXN-9524	MNXR94953	[]	extract from iCC541
180	r_0180	SBO:0000176	valine transaminase	glu__L[c] + 3mob[c] -> akg[c] + val__L[c]	FALSE	AB395_RS19375 or AB395_RS03155	0	1000	Valine, Leucine and Isoleucine Biosynthesis	2.6.1.42	R01214	rxn00903	BAT2_2; VALTA; VALTAim	BRANCHED-CHAINAMINOTRANSFERVAL-RXN	MNXR96230	24816	extract from iCC541
181	r_0181	SBO:0000176	UMP kinase	atp[c] + ump[c] <=> adp[c] + udp[c]	TRUE	AB395_RS05430 or AB395_RS04015 or AB395_RS06065	-1000	1000	Pyrimidine Metabolism	2.7.4.14 or 2.7.4.22	R00158	rxn00119	UMPK; UMPKURIDK1; UMPKn; URA6_1; URA6_2; URIDK1	RXN-12002	MNXR105118	24401	extract from iCC541
182	r_0182	SBO:0000176	enoyl-[acyl-carrier-protein] reductase (NADH) (n-C4:0)	h[c] + nadh[c] + but2eACP[c] -> nad[c] + butACP[c]	FALSE	AB395_RS02690 and AB395_RS19515	0	1000	Fatty Acid Biosynthesis	1.3.1.9; 2.3.1.-	R04429	rxn05322	BTMAT1; EAR40x	[]	[]	[]	extract from iCC541
183	r_0183	SBO:0000176	3-hydroxyacyl-[acyl-carrier-protein] dehydratase (n-C14:0)	3hmrsACP[c] -> h2o[c] + tmrs2eACP[c]	FALSE	AB395_RS19525 or AB395_RS06100 or AB395_RS08935	0	1000	Fatty Acid Biosynthesis	4.2.1.59	R04568	rxn05335	3HAD140	RXN-9537	MNXR94879	[]	extract from iCC541
184	r_0184	SBO:0000176	imidazoleglycerol-phosphate dehydratase	eig3p[c] -> h2o[c] + imacp[c]	FALSE	AB395_RS31685	0	1000	Histidine Metabolism	4.2.1.19	R03457	rxn02473	IGPDH	IMIDPHOSDEHYD-RXN	MNXR100813	11041	extract from iCC541
185	r_0185	SBO:0000176	leucine transaminase (irreversible)	glu__L[c] + 4mop[c] -> akg[c] + leu__L[c]	FALSE	AB395_RS19375 or AB395_RS03155	0	1000	Valine, Leucine and Isoleucine Biosynthesis	2.6.1.42	R01090	rxn00806	BAT1_1; BAT2_3; LEUTA; LEUTAi; LEUTAm	BRANCHED-CHAINAMINOTRANSFERLEU-RXN	MNXR96229	18324	extract from iCC541
186	r_0186	SBO:0000176	aconitase (half-reaction A, Citrate hydro-lyase)	cit[c] <=> h2o[c] + acon_C[c]	TRUE	AB395_RS27600	-1000	1000	TCA Cycle	4.2.1.3	R01325	rxn00974	ACONTa	ACONITATEDEHYDR-RXN	MNXR95386	10231	extract from iCC541
187	r_0187	SBO:0000176	thymidylate synthase	dump[c] + mlthf[c] -> dhf[c] + dtmp[c]	FALSE	AB395_RS10100	0	1000	Pyrimidine Metabolism	2.1.1.45	R02101	rxn01520	CDC21; TMDS	THYMIDYLATESYN-RXN	MNXR123914	12105	extract from iCC541
188	r_0188	SBO:0000176	pyridoxal kinase	atp[c] + pydx[c] -> adp[c] + pydx5p[c]	FALSE	AB395_RS28815 or AB395_RS22130 or AB395_RS02775 or AB395_RS28815	0	1000	Vitamin B6 Metabolism	2.7.1.35	R00174	rxn00124	PYDXK; U83	PYRIDOXKIN-RXN	MNXR103361	10225	extract from iCC541
189	r_0189	SBO:0000176	pyridoxamine 5-phosphate oxidase	h2o[c] + o2[c] + pyam5p[c] -> h[c] + nh3[c] + pydx5p[c] + h2o2[c]	FALSE	AB395_RS02675 or AB395_RS26815	0	1000	Vitamin B6 Metabolism	1.4.3.5	R00277	rxn00208	PDX3_1; PDX3_5; PYAM5PO	PMPOXI-RXN	MNXR103355	15818	extract from iCC541
190	r_0190	SBO:0000176	L-threonine dehydrogenase	nad[c] + thr__L[c] -> h[c] + nadh[c] + 2aobut[c]	FALSE	AB395_RS11120	0	1000	Glycine, Serine, and Threonine Metabolism	1.1.1.103	R01465	rxn01068	THRD	THREODEHYD-RXN	MNXR103402	13162	extract from iCC541
191	r_0191	SBO:0000176	3-oxoacyl-[acyl-carrier-protein] reductase (n-C14:0)	h[c] + nadph[c] + 3omrsACP[c] <=> nadp[c] + 3hmrsACP[c]	TRUE	AB395_RS09750 and AB395_RS03985 and AB395_RS16655 and AB395_RS27030	-1000	1000	Fatty Acid Biosynthesis	1.1.1.100	R04566	rxn05342	3OAR140; HTDR6	RXN-9536	MNXR94944	[]	extract from iCC541
192	r_0192	SBO:0000176	glutamate-1-semialdehyde aminotransferase	glu1sa[c] -> 5aop[c]	FALSE	AB395_RS24805	0	1000	Porphyrin and Chlorophyll Metabolism	5.4.3.8	R02272	rxn01629	G1SAT; G1SATi	GSAAMINOTRANS-RXN	MNXR99850	14265	extract from iCC541
193	r_0193	SBO:0000176	purine-nucleoside phosphorylase (Deoxyguanosine)	h[c] + pi[c] + dgsn[c] <=> 2dr1p[c] + gua[c]	TRUE	AB395_RS18630	-1000	1000	Purine Metabolism	2.4.2.1	R01969	rxn01446	PNP1_5; PUNP4	DEOXYGUANPHOSPHOR-RXN	MNXR103346	27741	extract from iCC541
194	r_0194	SBO:0000176	pyruvate dehydrogenase (dihydrolipoamide dehydrogenase)	nad[c] + dhlam[c] -> h[c] + nadh[c] + lpam[c]	FALSE	AB395_RS00445	0	1000	Glycolysis / Gluconeogenesis	1.8.1.4	R01698	rxn01241	GCC2cm; LPD1; PDHc; PDHcm; PDHcr; PDHe3c	[]	[]	[]	extract from iCC541
195	r_0195	SBO:0000176	L-Serine hydro-lyase (adding homocysteine)	ser__L[c] + h2s[c] -> h2o[c] + cys__L[c]	FALSE	AB395_RS31685	0	1000	Cysteine and Methionine Metabolism	4.2.1.22	R00891	rxn05909	[]	[]	[]	[]	extract from iCC541
196	r_0196	SBO:0000176	homoserine kinase	atp[c] + hom__L[c] -> adp[c] + phom[c]	FALSE	AB395_RS28815 or AB395_RS02775 or AB395_RS22130	0	1000	Glycine, Serine, and Threonine Metabolism	2.7.1.39	R01771	rxn01300	HSK; THR1	HOMOSERKIN-RXN	MNXR100737	13985	extract from iCC541
197	r_0197	SBO:0000176	ribose-5-phosphate isomerase	r5p[c] <=> ru5p__D[c]	TRUE	AB395_RS23580	-1000	1000	Pentose Phosphate Pathway	5.3.1.6	R01056	rxn00777	[]	RIB5PISOM-RXN	MNXR141207	14660	extract from iCC541
198	r_0198	SBO:0000176	dTMP kinase	atp[c] + dtmp[c] <=> adp[c] + dtdp[c]	TRUE	AB395_RS07955	-1000	1000	Pyrimidine Metabolism	2.7.4.9	R02094	rxn01513	CDC8; DTMPK	DTMPKI-RXN	MNXR97804	13518	extract from iCC541
199	r_0199	SBO:0000176	enoyl-[acyl-carrier-protein] reductase (NADH) (n-C8:0)	h[c] + nadh[c] + toct2eACP[c] -> nad[c] + ocACP[c]	FALSE	AB395_RS02690 and AB395_RS19515	0	1000	Fatty Acid Biosynthesis	1.3.1.9; 2.3.1.-	R04958	rxn05325	EAR80x; OCMAT3	RXN-9659	MNXR109249	[]	extract from iCC541
200	r_0200	SBO:0000176	pantetheine-phosphate adenylyltransferase	atp[c] + pan4p[c] <=> ppi[c] + dpcoa[c]	TRUE	AB395_RS24815 or AB395_RS12040	-1000	1000	Pantothenate and CoA Biosynthesis	2.7.7.3	R03035	rxn02175	PTPAT; PTPATi; PTPATim; U94; U95	PANTEPADENYLYLTRAN-RXN	MNXR95892	19802	extract from iCC541
201	r_0201	SBO:0000176	NAPRTase (rev)	h[c] + nac[c] + prpp[c] <=> ppi[c] + nicrnt[c]	TRUE	AB395_RS01000	-1000	1000	Nicotinate and Nicotinamide	6.3.4.21	R01724	rxn01265	NAPRT; NAPRTm; NAPRTr; NCTPPRT; NPT1_1; NPT1_2	NICOTINATEPRIBOSYLTRANS-RXN	MNXR101909	13393	extract from iCC541
202	r_0202	SBO:0000176	nicotinamide-nucleotide adenylyltransferase	atp[c] + nmn[c] <=> ppi[c] + nad[c]	TRUE	AB395_RS24490 or AB395_RS17080	-1000	1000	Nicotinate and Nicotinamide	2.7.7.18	R00137	rxn00105	NMNAT; NMNATm; NMNATr; YLR328W_3	2.7.7.1-RXN	MNXR95841	21361	extract from iCC541
203	r_0203	SBO:0000176	diaminohydroxyphosphoribosylaminopyrimidine deaminase	h2o[c] + 25drapp[c] <=> nh3[c] + 5apru[c]	TRUE	AB395_RS25170 or AB395_RS11825	-1000	1000	Riboflavin Metabolism	3.5.4.26	R03459	rxn02475	DHPPDA; DHPPDA2; RIB7_1	RIBOFLAVINSYNDEAM-RXN	MNXR97435	21869	extract from iCC541
204	r_0204	SBO:0000176	tetrahydrodipicolinate succinylase	h2o[c] + succoa[c] + thdp[c] -> coa[c] + sl2a6o[c]	FALSE	AB395_RS00350	0	1000	Lysine Biosynthesis	2.3.1.117	R04365	rxn03031	THDPS	TETHYDPICSUCC-RXN	MNXR104806	17325	extract from iCC541
205	r_0205	SBO:0000176	glycogen synthase (ADPGlc)	adpglc[c] + glycogen1[c] -> adp[c] + glycogen[c]	FALSE	AB395_RS15520 and AB395_RS26625	0	1000	Glycolysis / Gluconeogenesis	2.4.1.21	[]	rxn08615	[]	[]	[]	[]	extract from iCC541
206	r_0206	SBO:0000176	guanine deaminase	h2o[c] + gua[c] -> nh3[c] + xan[c]	FALSE	AB395_RS25170 or AB395_RS11825	0	1000	Purine Metabolism	3.5.4.3	R01676	rxn01225	GUAD; GUADr	GUANINE-DEAMINASE-RXN	MNXR100464	14666	extract from iCC541
207	r_0207	SBO:0000176	uroporphyrinogen-III synthase	hmbil[c] -> h2o[c] + uppg3[c]	FALSE	AB395_RS17235	0	1000	Porphyrin and Chlorophyll Metabolism	4.2.1.75	R03165	rxn02264	HEM4; UPP3S	UROGENIIISYN-RXN	MNXR105139	18965	extract from iCC541
208	r_0208	SBO:0000185	o2 transport (diffusion)	o2[e] <=> o2[c]	TRUE	spontaneous	-1000	1000	Transport	[]	[]	rxn05468	[]	[]	[]	[]	extract from iCC541
209	r_0209	SBO:0000176	adenine phosphoribosyltransferase (r)	prpp[c] + ade[c] <=> ppi[c] + amp[c]	TRUE	AB395_RS11505	-1000	1000	Purine Metabolism	2.4.2.7	R00190	rxn00139	ADPT; APT1; APT2	ADENPRIBOSYLTRAN-RXN	MNXR95482	16609	extract from iCC541
210	r_0210	SBO:0000176	phosphoribosylanthranilate isomerase	pran[c] <=> 2cpr5p[c]	TRUE	AB395_RS18090	-1000	1000	Phenylalanine Tyrosine Tryptophan Biosynthesis	5.3.1.24	R03509	rxn02508	PRAI; PRAIi; TRP1	PRAISOM-RXN	MNXR103156	21541	extract from iCC541
211	r_0211	SBO:0000176	proline racemase	pro__L[c] -> pro__D[c]	FALSE	AB395_RS16115 or AB395_RS00505	0	1000	Arginine and Proline Metabolism	5.1.1.4	R01255	rxn00933	[]	PROLINE-RACEMASE-RXN	MNXR106886	10683	extract from iCC541
212	r_0212	SBO:0000176	enoyl-[acyl-carrier-protein] reductase (NADH) (n-C10:0)	h[c] + nadh[c] + tdec2eACP[c] -> nad[c] + dcaACP[c]	FALSE	AB395_RS02690 and AB395_RS19515	0	1000	Fatty Acid Biosynthesis	1.3.1.9; 2.3.1.-	R04961	rxn05327	DEMAT4; EAR100x	[]	[]	[]	extract from iCC541
213	r_0213	SBO:0000176	glutamate racemase	glu__D[c] <=> glu__L[c]	TRUE	AB395_RS08080 or AB395_RS17325	-1000	1000	Alanine, Aspartate and Glutamate metabolism	5.1.1.3	R00260	rxn00193	GLUR	GLUTRACE-RXN	MNXR100288	12816	extract from iCC541
214	r_0214	SBO:0000176	3-hydroxyacyl-CoA dehydratase (3-hydroxydodecanoyl-CoA)	3hddcoa[c] <=> h2o[c] + dd2coa[c]	TRUE	AB395_RS11485 or AB395_RS04705 or AB395_RS28305 or AB395_RS20255	-1000	1000	Fatty Acid Metabolism	4.2.1.17	R04170	rxn02911	ECOAH5; ECOAH5p	[]	[]	[]	extract from iCC541
215	r_0215	SBO:0000176	ornithine carbamoyltransferase, irreversible	orn[c] + cbp[c] -> 2 h[c] + pi[c] + citr__L[c]	FALSE	AB395_RS32715 or AB395_RS00695	0	1000	Arginine biosynthesis	2.1.3.3	R01398	rxn01019	[]	ORNCARBAMTRANSFER-RXN	[]	19516	extract from iCC541
216	r_0216	SBO:0000176	CTP synthase (glutamine)	atp[c] + h2o[c] + gln__L[c] + utp[c] -> 2 h[c] + glu__L[c] + pi[c] + adp[c] + ctp[c]	FALSE	AB395_RS05780 or AB395_RS17450	0	1000	Pyrimidine Metabolism	6.3.4.2	R00573	rxn00412	CTPS2; URA7_1; URA8_1	CTPSYN-RXN	MNXR96945	26427	extract from iCC541
217	r_0217	SBO:0000176	pantothenate synthase	atp[c] + pant__R[c] + ala_B[c] <=> ppi[c] + amp[c] + pnto__R[c]	TRUE	AB395_RS10250	-1000	1000	Pantothenate and CoA Biosynthesis	6.3.2.1	R02473	rxn01791	PANTS; YIL145C	PANTOATE-BETA-ALANINE-LIG-RXN	MNXR102345	10913	extract from iCC541
218	r_0218	SBO:0000176	adenine deaminase	h2o[c] + ade[c] -> nh3[c] + hxan[c]	FALSE	AB395_RS11715	0	1000	Purine Metabolism	3.5.4.2	R01244	rxn00926	AAH1_3; ADD	ADENINE-DEAMINASE-RXN	MNXR95443	23689	extract from iCC541
219	r_0219	SBO:0000176	phenylalanine transaminase	glu__L[c] + phpyr[c] <=> phe__L[c] + akg[c]	TRUE	AB395_RS31140 or AB395_RS18540 or AB395_RS19905	-1000	1000	Phenylalanine Tyrosine Tryptophan Biosynthesis	2.6.1.9 or 2.6.1.1 or 2.6.1.5	R00694	rxn00493	ARO9_1; PHETA1	RXN-10814	[]	25155	extract from iCC541
220	r_0220	SBO:0000185	CO2 transporter via diffusion	co2[e] <=> co2[c]	TRUE	spontaneous	-1000	1000	Transport	[]	[]	rxn05467	[]	[]	[]	[]	extract from iCC541
221	r_0221	SBO:0000176	3-oxoacyl-[acyl-carrier-protein] reductase (n-C6:0)	h[c] + nadph[c] + 3ohexACP[c] <=> nadp[c] + 3hhexACP[c]	TRUE	AB395_RS09750 and AB395_RS03985 and AB395_RS16655 and AB395_RS27030	-1000	1000	Fatty Acid Biosynthesis	1.1.1.100	R04953	rxn05337	3OAR60; HHYR2	[]	[]	[]	extract from iCC541
222	r_0222	SBO:0000176	threonine synthase	h2o[c] + phom[c] -> h[c] + pi[c] + thr__L[c]	FALSE	AB395_RS02820	0	1000	Glycine, Serine, and Threonine Metabolism	4.2.3.1	R01466	rxn01069	THR4_1; THRS	THRESYN-RXN	MNXR104846	10841	extract from iCC541
223	r_0223	SBO:0000176	agmatinase	h2o[c] + agm[c] -> ptrc[c] + urea[c]	FALSE	AB395_RS12550 or AB395_RS04680	0	1000	Arginine and Proline Metabolism	3.5.3.11	R01157	rxn00858	AGMT	AGMATIN-RXN	MNXR95554	13929	extract from iCC541
224	r_0224	SBO:0000176	fructose-bisphosphatase	h2o[c] + fdp[c] <=> h[c] + pi[c] + f6p[c]	TRUE	AB395_RS26125 or AB395_RS15405	-1000	1000	Glycolysis / Gluconeogenesis	3.1.3.11	R00762	rxn00549	FBP; FBP1	F16BDEPHOS-RXN	MNXR96239	11065	extract from iCC541
225	r_0225	SBO:0000176	phosphotransacetylase	h[c] + pi[c] + accoa[c] <=> coa[c] + actp[c]	TRUE	AB395_RS24640	-1000	1000	Glycolysis / Gluconeogenesis	2.3.1.8	R00230	rxn00173	PTA; PTAr	PHOSACETYLTRANS-RXN	MNXR103319	19524	extract from iCC541
226	r_0226	SBO:0000176	adenosine hydrolase	h2o[c] + adn[c] -> rib__D[c] + ade[c]	FALSE	AB395_RS18150	0	1000	Purine Metabolism	3.2.2.1	R01245	rxn00927	ADNUC; PNS1; URH1_2	ADENOSINE-NUCLEOSIDASE-RXN	MNXR95459	18670	extract from iCC541
227	r_0227	SBO:0000176	acetolactate synthase	h[c] + pyr[c] + thmpp[c] -> co2[c] + 2ahethmpp[c]	FALSE	AB395_RS05805 and AB395_RS05810	0	1000	TCA Cycle	1.2.4.1	R00014	rxn00011	[]	RXN-12583	MNXR102428	[]	extract from iCC541
228	r_0228	SBO:0000176	phosphoribosylglycinamide formyltransferase, irreversible	10fthf[c] + gar[c] -> h[c] + thf[c] + fgam[c]	FALSE	AB395_RS04205	0	1000	Purine Metabolism	2.1.2.2	R04325	rxn03004	ADE8; GARFT; GARFTi	GART-RXN	MNXR115906	15056	extract from iCC541
229	r_0229	SBO:0000176	phosphoglycerate dehydrogenase reversible	nad[c] + 3pg[c] <=> h[c] + nadh[c] + 3php[c]	TRUE	AB395_RS26770 or AB395_RS14580 or AB395_RS23540	-1000	1000	Glycine, Serine, and Threonine Metabolism	1.1.1.95	R01513	rxn01101	PGCD; PGCDr; SER3; SER33	PGLYCDEHYDROG-RXN	MNXR102527	12644	extract from iCC541
230	r_0230	SBO:0000176	Acetyl-CoA ACP transacylase	accoa[c] + ACP[c] <=> coa[c] + acACP[c]	TRUE	AB395_RS17540	-1000	1000	Fatty Acid Biosynthesis	2.3.1.-	R01624	rxn05349	ACOATA; ACOATAm; FAS1_s	ACP-S-ACETYLTRANSFER-RXN	MNXR95376	41791	extract from iCC541
231	r_0231	SBO:0000176	phosphoribosylaminoimidazole synthase	atp[c] + fpram[c] -> h[c] + pi[c] + adp[c] + air[c]	FALSE	AB395_RS04210	0	1000	Purine Metabolism	6.3.3.1	R04208	rxn02937	ADE5_7_2; PRAIS	AIRS-RXN	MNXR139261	23033	extract from iCC541
232	r_0232	SBO:0000176	glutamine phosphoribosyldiphosphate amidotransferase	h2o[c] + gln__L[c] + prpp[c] -> ppi[c] + glu__L[c] + pram[c]	FALSE	AB395_RS03900	0	1000	Purine Metabolism	2.4.2.14	R01072	rxn00790	ADE4; GLUPRT	PRPPAMIDOTRANS-RXN	MNXR100287	14908	extract from iCC541
233	r_0233	SBO:0000176	alanine racemase	ala__L[c] <=> ala__D[c]	TRUE	AB395_RS03915	-1000	1000	Alanine, Aspartate and Glutamate metabolism	5.1.1.1	R00401	rxn00283	ALAR; ALARi	ALARACECAT-RXN	MNXR95693	20252	extract from iCC541
234	r_0234	SBO:0000176	3-methyl-2-oxobutanoate hydroxymethyltransferase	h2o[c] + 3mob[c] + mlthf[c] <=> thf[c] + 2dhp[c]	TRUE	AB395_RS23775 or AB395_RS10245	-1000	1000	Pantothenate and CoA Biosynthesis	2.1.2.11	R01226	rxn00912	ECM31; MOHMT	3-CH3-2-OXOBUTANOATE-OH-CH3-XFER-RXN	MNXR115230	11827	extract from iCC541
235	r_0235	SBO:0000176	3-oxoacyl-[acyl-carrier-protein] reductase (n-C16:0)	h[c] + nadph[c] + 3opalmACP[c] <=> nadp[c] + 3hpalmACP[c]	TRUE	AB395_RS09750 and AB395_RS03985 and AB395_RS16655 and AB395_RS27030	-1000	1000	Fatty Acid Biosynthesis	1.1.1.100	R04543	rxn05336	3OAR160; HHDR7	[]	[]	[]	extract from iCC541
236	r_0236	SBO:0000176	argininosuccinate lyase	argsuc[c] <=> fum[c] + arg__L[c]	TRUE	AB395_RS13990	-1000	1000	Alanine, Aspartate and Glutamate metabolism	4.3.2.1	R01086	rxn00802	[]	ARGSUCCINLYA-RXN	MNXR138059	24023	extract from iCC541
237	r_0237	SBO:0000176	ornithine cyclodeaminase	orn[c] -> 2 h[c] + nh3[c] + pro__L[c]	FALSE	AB395_RS18315 or AB395_RS22595 or AB395_RS28900	0	1000	Arginine and Proline Metabolism	4.3.1.12	R00671	rxn00471	[]	ORNITHINE-CYCLODEAMINASE-RXN	MNXR102218	24369	extract from iCC541
238	r_0238	SBO:0000176	Deoxyadenosine deaminase	h2o[c] + dad_2[c] -> nh3[c] + din[c]	FALSE	AB395_RS18650	0	1000	Purine Metabolism	3.5.4.4	R02556	rxn01858	AAH1_2; DADA	ADDALT-RXN	MNXR97076	28190	extract from iCC541
239	r_0239	SBO:0000176	O-Succinyl-L-homoserine succinate-lyase (adding cysteine)	suchms[c] + h2s[c] <=> h[c] + hcys__L[c] + succ[c]	TRUE	AB395_RS31685	-1000	1000	Cysteine and Methionine Metabolism	2.5.1.-	R01288	rxn05957	SHSL2; SHSL2r	RXN-9384	MNXR104382	27829	extract from iCC541
240	r_0240	SBO:0000176	3-hydroxyacyl-[acyl-carrier-protein] dehydratase (n-C12:0)	3hddecACP[c] -> h2o[c] + tddec2eACP[c]	FALSE	AB395_RS19525 or AB395_RS06100 or AB395_RS08935	0	1000	Fatty Acid Biosynthesis	4.2.1.59	R04965	rxn05331	3HAD120; HDDHL5	[]	[]	[]	extract from iCC541
241	r_0241	SBO:0000176	3-hydroxyacyl-CoA dehydrogenase (3-oxodecanoyl-CoA)	nad[c] + 3hdcoa[c] <=> h[c] + nadh[c] + 3odcoa[c]	TRUE	AB395_RS29085 or AB395_RS12850	-1000	1000	Fatty Acid Metabolism	1.1.1.35	R04743	rxn03244	HACD4; HACD4i; HACD4p	RXN-12490	MNXR100545	31188	extract from iCC541
242	r_0242	SBO:0000176	3-oxoacyl-[acyl-carrier-protein] synthase (n-C10:0)	h[c] + malACP[c] + ocACP[c] -> 3odecACP[c] + co2[c] + ACP[c]	FALSE	AB395_RS19520 or AB395_RS03995 or AB395_RS08925 or AB395_RS08930	0	1000	Fatty Acid Biosynthesis	2.3.1.41; 2.3.1.179	R04960	rxn05343	3OAS100; CEM1_4; FAS2_4_1; MCMAT4	RXN-9527	MNXR109251	[]	extract from iCC541
243	r_0243	SBO:0000176	adenylosuccinate lyase	dcamp[c] -> amp[c] + fum[c]	FALSE	AB395_RS07505	0	1000	Alanine, Aspartate and Glutamate metabolism	4.3.2.2	R01083	rxn00800	ADE13_2; ADSL1; ADSL1r	AMPSYN-RXN	MNXR95493	16856	extract from iCC541
244	r_0244	SBO:0000176	serine O-acetyltransferase, irreversible	accoa[c] + ser__L[c] -> coa[c] + acser[c]	FALSE	AB395_RS15665	0	1000	Sulfur Metabolism	2.3.1.30	R00586	rxn00423	SERAT; SERATi; U48	SERINE-O-ACETTRAN-RXN	MNXR104275	24560	extract from iCC541
245	r_0245	SBO:0000176	3-hydroxyacyl-CoA dehydratase (3-hydroxytetradecanoyl-CoA)	3htdcoa[c] <=> h2o[c] + td2coa[c]	TRUE	AB395_RS04705 or AB395_RS11485 or AB395_RS20255 or AB395_RS28305	-1000	1000	Fatty Acid Metabolism	4.2.1.17	R04740	rxn03241	ECOAH6; ECOAH6p	RXN-14273	MNXR97891	31173	extract from iCC541
246	r_0246	SBO:0000176	tryptophan synthase (indoleglycerol phosphate)	ser__L[c] + 3ig3p[c] -> h2o[c] + g3p[c] + trp__L[c]	FALSE	AB395_RS04315	0	1000	Phenylalanine Tyrosine Tryptophan Biosynthesis	4.2.1.20	R02722	rxn01964	TRPS1r	TRYPSYN-RXN	MNXR104343	10533	extract from iCC541
247	r_0247	SBO:0000176	cob(I)alamin adenosyltransferase	atp[c] + cbl1[c] <=> pppi[c] + adocbl[c]	TRUE	AB395_RS08990	-1000	1000	Porphyrin and Chlorophyll Metabolism	2.5.1.17	R01492	[]	CBLAT	COBALADENOSYLTRANS-RXN	MNXR96476	28672	extract from iCC541
248	r_0248	SBO:0000176	3-oxoacyl-[acyl-carrier-protein] synthase (n-C12:0)	h[c] + malACP[c] + dcaACP[c] -> co2[c] + ACP[c] + 3oddecACP[c]	FALSE	AB395_RS19520 or AB395_RS03995 or AB395_RS08925 or AB395_RS08930	0	1000	Fatty Acid Biosynthesis	2.3.1.41; 2.3.1.179	R04963	rxn05348	3OAS120; CEM1_5; FAS2_5_1; MCMAT5	RXN-9531	MNXR109254	[]	extract from iCC541
249	r_0249	SBO:0000176	1-deoxy-D-xylulose 5-phosphate synthase	h[c] + g3p[c] + pyr[c] -> co2[c] + dxyl5p[c]	FALSE	AB395_RS02595	0	1000	Terpenoid Backbone Biosynthesis	2.2.1.7	R05636	rxn03909	DXPS	DXS-RXN	MNXR97831	12606	extract from iCC541
250	r_0250	SBO:0000176	phosphopentomutase	r5p[c] -> r1p[c]	FALSE	AB395_RS18655 or AB395_RS15525	0	1000	Purine Metabolism	5.4.2.7;5.4.2.2	R01057	rxn00778	[]	PPENTOMUT-RXN	MNXR141225	18796	extract from iCC541
251	r_0251	SBO:0000176	Aminobutyraldehyde dehydrogenase	h2o[c] + nad[c] + 4abutn[c] -> 2 h[c] + nadh[c] + 4abut[c]	FALSE	AB395_RS11415 or AB395_RS28825 or AB395_RS13135 or AB395_RS26800 or AB395_RS23805 or AB395_RS25115 or AB395_RS10675	0	1000	Arginine and Proline Metabolism	1.2.1.3; 1.2.1.19; 1.2.1.-	R02549	rxn01851	ABUTD; ABUTDm; U68	AMINOBUTDEHYDROG-RXN	MNXR95191	19106	extract from iCC541
252	r_0252	SBO:0000185	magnesium transport via ABC system	atp[c] + h2o[c] + mg2[e] -> h[c] + pi[c] + adp[c] + mg2[c]	FALSE	AB395_RS32770	0	1000	Transport	3.6.3.2	[]	rxn10571	[]	[]	[]	[]	extract from iCC541
253	r_0253	SBO:0000176	thymidine kinase (ATP:thymidine)	atp[c] + thymd[c] -> adp[c] + dtmp[c]	FALSE	AB395_RS11680 or AB395_RS26140	0	1000	Pyrimidine Metabolism	2.7.1.21	R01567	rxn01143	TMDK1; U16	THYKI-RXN	MNXR104885	19130	extract from iCC541
254	r_0254	SBO:0000176	3-oxoacyl-[acyl-carrier-protein] synthase (n-C14:0)	h[c] + malACP[c] + ddcaACP[c] -> co2[c] + ACP[c] + 3omrsACP[c]	FALSE	AB395_RS19520 or AB395_RS03995 or AB395_RS08925 or AB395_RS08930	0	1000	Fatty Acid Biosynthesis	2.3.1.41; 2.3.1.179	R04726	rxn05345	3OAS140; CEM1_6; FAS2_6_1; MCMAT6	RXN-9535	MNXR109082	[]	extract from iCC541
255	r_0255	SBO:0000176	4-Hydroxy-L-threonine synthase	h2o[c] + phthr[c] -> h[c] + pi[c] + 4hthr[c]	FALSE	AB395_RS02820	0	1000	Vitamin B6 Metabolism	4.2.3.1	R05086	rxn03446	4HTHRS; THR4_2	RXN-14125	MNXR95024	30662	extract from iCC541
256	r_0256	SBO:0000176	6-phosphogluconolactonase	h2o[c] + 6pgl[c] -> h[c] + 6pgc[c]	FALSE	AB395_RS01685	0	1000	Pentose Phosphate Pathway	3.1.1.31	R02035	rxn01476	PGL; SOL1; SOL2; SOL3; SOL4	6PGLUCONOLACT-RXN	MNXR102539	12557	extract from iCC541
257	r_0257	SBO:0000176	phosphoribosyl-AMP cyclohydrolase	h2o[c] + prbamp[c] -> prfp[c]	FALSE	AB395_RS05670	0	1000	Histidine Metabolism	3.5.4.19	R04037	rxn02835	HIS4_2; PRAMPC	HISTCYCLOHYD-RXN	MNXR103154	20050	extract from iCC541
258	r_0258	SBO:0000176	3-hydroxyacyl-CoA dehydrogenase (3-oxohexadecanoyl-CoA)	nad[c] + 3hhdcoa[c] <=> h[c] + nadh[c] + 3ohdcoa[c]	TRUE	AB395_RS12850 or AB395_RS29085	-1000	1000	Fatty Acid Metabolism	1.1.1.35	R04737	rxn03239	HACD7; HACD7i; HACD7p	RXN-14271	MNXR100548	31160	extract from iCC541
259	r_0259	SBO:0000176	purine-nucleoside phosphorylase (Xanthosine)	h[c] + pi[c] + xtsn[c] <=> r1p[c] + xan[c]	TRUE	AB395_RS18630	-1000	1000	Purine Metabolism	2.4.2.1	R02297	rxn01649	PNP1_9; PUNP7	XANTHOSINEPHOSPHORY-RXN	MNXR103349	27639	extract from iCC541
260	r_0260	SBO:0000176	2-isopropylmalate hydratase	h2o[c] + 2ippm[c] <=> 3c3hmp[c]	TRUE	AB395_RS16910 and AB395_RS17000	-1000	1000	Valine, Leucine and Isoleucine Biosynthesis	4.2.1.33	R03968	rxn02789	IPPMIb; LEU1_2	3-ISOPROPYLMALISOM-RXN	MNXR100826	16296	extract from iCC541
261	r_0261	SBO:0000176	enoyl-[acyl-carrier-protein] reductase (NADH) (n-C6:0)	h[c] + nadh[c] + thex2eACP[c] -> nad[c] + hexACP[c]	FALSE	AB395_RS02690 and AB395_RS19515	0	1000	Fatty Acid Biosynthesis	1.3.1.9; 2.3.1.-	R04955	rxn05326	EAR60x; HEMAT2	RXN-9658	MNXR109246	[]	extract from iCC541
262	r_0262	SBO:0000185	NADH dehydrogenase	5 h[c] + nadh[c] + q[c] <=> nad[c] + qh2[c] + 4 h[e]	TRUE	( AB395_RS10830 and AB395_RS10835 and AB395_RS10845 and AB395_RS10850 and AB395_RS10855 and AB395_RS10860 and AB395_RS10865 and AB395_RS10870 and AB395_RS10875 and AB395_RS10880 and AB395_RS10885 and AB395_RS10905 and AB395_RS10910 ) or ( AB395_RS04840 and AB395_RS04845 and AB395_RS04850 and AB395_RS04855 and AB395_RS04865 and AB395_RS04870 and AB395_RS04875 and AB395_RS04880 and AB395_RS04885 an…	-1000	1000	Oxidative Phosphorylation	1.6.5.3	[]	[]	[]	[]	[]	[]	extract from iCC541
263	r_0263	SBO:0000176	Glycine Cleavage System	nad[c] + thf[c] + gly[c] -> h[c] + nh3[c] + nadh[c] + co2[c] + mlthf[c]	FALSE	AB395_RS04205	0	1000	One carbon pool by folate	2.1.2.1	R01221	rxn00908	GCV1_2; GLYCL; GLYCL_2; GLYCLm	GCVMULTI-RXN	MNXR115907	27761	extract from iCC541
264	r_0264	SBO:0000176	malate dehydrogenase	nad[c] + mal__L[c] <=> h[c] + nadh[c] + oaa[c]	TRUE	AB395_RS16855	-1000	1000	Glycolysis / Gluconeogenesis;TCA Cycle	1.1.1.37	R00342	rxn00248	MDH; MDH1; MDHi2; MDHm; MDHp	MALATE-DEH-RXN	MNXR101439	21435	extract from iCC541
265	r_0265	SBO:0000176	chorismate mutase	chor[c] -> pphn[c]	FALSE	AB395_RS17305 or AB395_RS00885	0	1000	Phenylalanine Tyrosine Tryptophan Biosynthesis	5.4.99.5	R01715	rxn01256	ARO7; CH or M; CHORM	CHORISMATEMUT-RXN	MNXR96708	13900	extract from iCC541
266	r_0266	SBO:0000176	argininosuccinate synthase	atp[c] + asp__L[c] + citr__L[c] -> ppi[c] + amp[c] + argsuc[c]	FALSE	AB395_RS17450	0	1000	Alanine, Aspartate and Glutamate metabolism	6.3.4.5	R01954	rxn01434	[]	ARGSUCCINSYN-RXN	MNXR138060	10932	extract from iCC541
267	r_0267	SBO:0000176	3-hydroxyacyl-CoA dehydrogenase (3-oxohexanoyl-CoA)	nad[c] + 3hhcoa[c] <=> h[c] + nadh[c] + 3ohcoa[c]	TRUE	AB395_RS12850 or AB395_RS29085	-1000	1000	Fatty Acid Metabolism	1.1.1.35	R04748	rxn03249	HACD2; HACD2i	RXN-12570	MNXR100543	31144	extract from iCC541
268	r_0268	SBO:0000176	thiazole phosphate synthesis	atp[c] + tyr__L[c] + dxyl5p[c] + cys__L[c] -> ppi[c] + h2o[c] + amp[c] + co2[c] + ala__L[c] + 4mpetz[c] + 4hba[c]	FALSE	AB395_RS28140	0	1000	Thiamine Metabolism	[]	[]	rxn09310	[]	[]	[]	[]	extract from iCC541
269	r_0269	SBO:0000185	H2O transport via diffusion	h2o[e] <=> h2o[c]	TRUE	spontaneous	-1000	1000	Transport	[]	[]	rxn05319	[]	[]	[]	[]	extract from iCC541
270	r_0270	SBO:0000176	nitrogenase	16 atp[c] + 16 h2o[c] + 8 fdxrd[c] + n2[c] -> 8 h[c] + 16 pi[c] + 16 adp[c] + 8 fdxox[c] + 2 fixedNH3[c] + h2[c]	FALSE	AB395_RS31810 and AB395_RS31065 and AB395_RS31070 and AB395_RS31015 and AB395_RS31010 and AB395_RS08855 and AB395_RS08850 and AB395_RS30990 and AB395_RS31080 and AB395_RS31060 and AB395_RS31800 and AB395_RS31805	0	1000	Nitrogen Metabolism; Symbiosis	1.18.6.1	[]	rxn06874	[]	[]	[]	[]	extract from iCC541
271	r_0271	SBO:0000176	nucleotide phosphatase	nac[c] + r1p[c] <=> pi[c] + nicrns[c]	TRUE	AB395_RS18630	-1000	1000	Nicotinate and Nicotinamide	2.4.2.1	R02295	rxn01647	[]	[]	[]	[]	extract from iCC541
272	r_0272	SBO:0000176	methenyltetrahydrofolate cyclohydrolase	h2o[c] + methf[c] <=> h[c] + 10fthf[c]	TRUE	AB395_RS11645	-1000	1000	One carbon pool by folate	3.5.4.9	R01655	rxn01211	ADE3_3; MIS1_3; MTHFC; MTHFCm	METHENYLTHFCYCLOHYDRO-RXN	MNXR116053	23703	extract from iCC541
273	r_0273	SBO:0000176	phosphoribosylpyrophosphate synthetase	atp[c] + r5p[c] -> amp[c] + prpp[c]	FALSE	AB395_RS32630 or AB395_RS11300	0	1000	Purine Metabolism	2.7.6.1	R01049	rxn00770	[]	PRPPSYN-RXN	MNXR141212	15612	extract from iCC541
274	r_0274	SBO:0000176	phosphoribosyl-ATP pyrophosphatase	h2o[c] + prbatp[c] -> ppi[c] + prbamp[c]	FALSE	AB395_RS05670 or AB395_RS18205	0	1000	Histidine Metabolism	3.6.1.31	R04035	rxn02834	HIS4_1; PRATPP	HISTPRATPHYD-RXN	MNXR103155	22829	extract from iCC541
275	r_0275	SBO:0000176	CDP-diacylglycerol-serine O-phosphatidyltransferase	ser__L[c] + cdpdag_cho[c] -> h[c] + ps_cho[c] + cmp[c]	FALSE	AB395_RS03890	0	1000	Glycine, Serine, and Threonine Metabolism	2.7.8.8	R01800	rxn06044	PSSA	PHOSPHASERSYN-RXN	MNXR107178	16916	extract from iCC541
276	r_0276	SBO:0000176	3-hydroxyacyl-CoA dehydratase (3-hydroxyoctanoyl-CoA)	3hocoa[c] <=> h2o[c] + oc2coa[c]	TRUE	AB395_RS20255 or AB395_RS28305 or AB395_RS11485 or AB395_RS04705	-1000	1000	Fatty Acid Metabolism	4.2.1.17	R04746	rxn03247	ECOAH3	[]	[]	[]	extract from iCC541
277	r_0277	SBO:0000176	ATP phosphoribosyltransferase reversible	atp[c] + prpp[c] <=> ppi[c] + prbatp[c]	TRUE	AB395_RS02125 or AB395_RS02120	-1000	1000	Histidine Metabolism	2.4.2.17	R01071	rxn00789	ATPPRT; ATPPRTr; HIS1	ATPPHOSPHORIBOSYLTRANS-RXN	MNXR96132	18476	extract from iCC541
278	r_0278	SBO:0000176	fructose-bisphosphate aldolase	fdp[c] <=> g3p[c] + dhap[c]	TRUE	AB395_RS25690 or AB395_RS24590 or AB395_RS15055	-1000	1000	Glycolysis / Gluconeogenesis	4.1.2.13	R01068	rxn00786	FBA	F16ALDOLASE-RXN	MNXR99464	14732	extract from iCC541
279	r_0279	SBO:0000176	histidinol-phosphatase	h2o[c] + hisp[c] -> h[c] + pi[c] + histd[c]	FALSE	AB395_RS26125 or AB395_RS15405	0	1000	Histidine Metabolism	3.1.3.15	R03013	rxn02160	HIS2; HISTP	HISTIDPHOS-RXN	MNXR100642	14466	extract from iCC541
280	r_0280	SBO:0000176	Adenosine deaminase	h2o[c] + adn[c] -> nh3[c] + ins[c]	FALSE	AB395_RS18650	0	1000	Purine Metabolism	3.5.4.4	R01560	rxn01137	AAH1_1; ADA	ADENODEAMIN-RXN	MNXR95432	24408	extract from iCC541
281	r_0281	SBO:0000176	proline oxidase (L-proline, NAD)	nad[c] + pro__L[c] -> h[c] + nadh[c] + 1pyr5c[c]	FALSE	AB395_RS16160 and AB395_RS11260	0	1000	Arginine and Proline Metabolism	1.5.1.2	R01248	rxn00929	P5CRx; PRO1x; PRO1xm; PUT1	[]	[]	[]	extract from iCC541
282	r_0282	SBO:0000176	urease	h2o[c] + urea[c] -> 2 nh3[c] + co2[c]	FALSE	AB395_RS12350 and AB395_RS12355 and AB395_RS12345	0	1000	Arginine biosynthesis	3.5.1.5	R00131	rxn00101	UREA; UREA2	UREASE-RXN	MNXR105153	[]	extract from iCC541
283	r_0283	SBO:0000176	aspartate transaminase	asp__L[c] + akg[c] <=> glu__L[c] + oaa[c]	TRUE	AB395_RS28050 or AB395_RS13070 or AB395_RS29430 or AB395_RS18540	-1000	1000	Alanine, Aspartate and Glutamate metabolism	2.6.1.1	R00355	rxn00260	AAT1_1; AAT2_1; ASPTA; ASPTA1; ASPTA1r; ASPTAm; ASPTAp	ASPAMINOTRANS-RXN	[]	21827	extract from iCC541
284	r_0284	SBO:0000176	purine-nucleoside phosphorylase (Deoxyinosine)	h[c] + pi[c] + din[c] <=> 2dr1p[c] + hxan[c]	TRUE	AB395_RS18630	-1000	1000	Purine Metabolism	2.4.2.1	R02748	rxn01985	PNP1_3; PUNP6	DEOXYINOPHOSPHOR-RXN	MNXR103348	27753	extract from iCC541
285	r_0285	SBO:0000176	3-isopropylmalate dehydratase	3c2hmp[c] <=> h2o[c] + 2ippm[c]	TRUE	AB395_RS16910 and AB395_RS17000	-1000	1000	Valine, Leucine and Isoleucine Biosynthesis	4.2.1.33	R04001	rxn02811	IPPMIa	[]	[]	[]	extract from iCC541
286	r_0286	SBO:0000176	riboflavin synthase	2 dmlz[c] <=> 6r5au[c] + ribflv[c]	TRUE	AB395_RS04350	-1000	1000	Riboflavin Metabolism	2.5.1.9	R00066	rxn00048	[]	RIBOFLAVIN-SYN-RXN	MNXR103430	20773	extract from iCC541
287	r_0287	SBO:0000176	phosphatidylserine decarboxylase	h[c] + ps_cho[c] <=> co2[c] + pe_hs[c]	TRUE	AB395_RS03885	-1000	1000	Glycine, Serine, and Threonine Metabolism	4.1.1.65	R02055	[]	PSD	PHOSPHASERDECARB-RXN	MNXR116127	20829	extract from iCC541
288	r_0288	SBO:0000176	arginase	h2o[c] + arg__L[c] -> orn[c] + urea[c]	FALSE	AB395_RS16600	0	1000	Arginine and proline metabolism	3.5.3.1	R00551	rxn00394	[]	ARGINASE-RXN	MNXR95945	20572	extract from iCC541
289	r_0289	SBO:0000176	acyl-CoA dehydrogenase (butanoyl-CoA)	fad[c] + btcoa[c] <=> b2coa[c] + fadh2[c]	TRUE	AB395_RS26300	-1000	1000	Fatty Acid Metabolism	1.3.99.3	R01175	rxn00872	ACOAD1f	[]	[]	[]	extract from iCC541
290	r_0290	SBO:0000176	deoxycytidine deaminase	h2o[c] + dcyt[c] -> nh3[c] + duri[c]	FALSE	AB395_RS18625	0	1000	Pyrimidine Metabolism	3.5.4.5	R02485	rxn01800	CDD1_2; DCYTD	CYTIDEAM-RXN	MNXR97207	13434	extract from iCC541
291	r_0291	SBO:0000176	phosphoenolpyruvate synthase	atp[c] + h2o[c] + pyr[c] -> h[c] + amp[c] + pi[c] + pep[c]	FALSE	AB395_RS32655	0	1000	Glycolysis / Gluconeogenesis	2.7.9.2	R00199	rxn00147	PPS	PEPSYNTH-RXN	MNXR103140	11365	extract from iCC541
292	r_0292	SBO:0000176	dimethylallyltranstransferase	ipdp[c] + dmpp[c] -> ppi[c] + grdp[c]	FALSE	AB395_RS17565	0	1000	Terpenoid Backbone Biosynthesis	2.5.1.1	R01658	rxn01213	DMATT	GPPSYN-RXN	MNXR97512	22408	extract from iCC541
293	r_0293	SBO:0000176	alanyl aminopeptidase (cys-gly)	h2o[c] + cgly[c] -> gly[c] + cys__L[c]	FALSE	AB395_RS03855 or AB395_RS04055	0	1000	Glutathione Metabolism	3.4.11.2 or 3.4.11.1	R00899	rxn00650	AMPTASECG; TRIA	RXN-6622	MNXR95828	28784	extract from iCC541
294	r_0294	SBO:0000176	purine-nucleoside phosphorylase (Adenosine)	h[c] + pi[c] + adn[c] <=> r1p[c] + ade[c]	TRUE	AB395_RS18630	-1000	1000	Purine Metabolism	2.4.2.1	R01561	rxn01138	PNP1_10; PNP1_7; PUNP1; PUNP1m; U103	ADENPHOSPHOR-RXN	MNXR103343	27645	extract from iCC541
295	r_0295	SBO:0000176	3-hydroxyacyl-[acyl-carrier-protein] dehydratase (n-C8:0)	3hoctACP[c] -> h2o[c] + toct2eACP[c]	FALSE	AB395_RS19525 or AB395_RS06100 or AB395_RS08935	0	1000	Fatty Acid Biosynthesis	4.2.1.59	R04537	rxn05334	3HAD80; HOCHL3	4.2.1.59-RXN	MNXR94888	[]	extract from iCC541
296	r_0296	SBO:0000176	nucleoside-diphosphate kinase (ATP:UDP)	atp[c] + udp[c] <=> adp[c] + utp[c]	TRUE	AB395_RS04100	-1000	1000	Pyrimidine Metabolism	2.7.4.6	R00156	rxn00117	NDPK2; YNK1_1	UDPKIN-RXN	MNXR101935	25099	extract from iCC541
297	r_0297	SBO:0000176	homoserine dehydrogenase (NADPH)	nadp[c] + hom__L[c] <=> h[c] + nadph[c] + aspsa[c]	TRUE	AB395_RS06495	-1000	1000	Glycine, Serine, and Threonine Metabolism	1.1.1.3	R01775	rxn01302	HOM6_2; HSDy; HSDyi	HOMOSERDEHYDROG-RXN	MNXR115966	15759	extract from iCC541
298	r_0298	SBO:0000176	deoxyguanylate kinase (dGMP:ATP)	atp[c] + dgmp[c] <=> adp[c] + dgdp[c]	TRUE	AB395_RS04015	-1000	1000	Purine Metabolism	2.7.4.8	R02090	rxn01509	DGK1; GUK1_2	GMKALT-RXN	MNXR97320	12698	extract from iCC541
299	r_0299	SBO:0000185	Homocitrate transport	atp[c] + h2o[c] + homocitrate[e] <=> h[c] + pi[c] + adp[c] + homocitrate[c]	TRUE	[]	-1000	1000	Transport	[]	[]	[]	[]	[]	[]	[]	extract from iCC541
300	r_0300	SBO:0000176	orotidine-5-phosphate decarboxylase	h[c] + orot5p[c] -> co2[c] + ump[c]	FALSE	AB395_RS20020	0	1000	Pyrimidine Metabolism	4.1.1.23	R00965	rxn00710	OMPDC; URA3	OROTPDECARB-RXN	MNXR102190	11597	extract from iCC541
301	r_0301	SBO:0000176	4-amino-5-hydroxymethyl-2-methylpyrimidine synthetase	h2o[c] + amet[c] + air[c] -> 4 h[c] + pi[c] + for[c] + met__L[c] + 4ahmmp[c] + dad_5[c] + co[c]	FALSE	AB395_RS28125	0	1000	Thiamine Metabolism	[]	[]	rxn09997	[]	[]	[]	[]	extract from iCC541
302	r_0302	SBO:0000176	glycine hydroxymethyltransferase	ser__L[c] + thf[c] -> h2o[c] + gly[c] + mlthf[c]	FALSE	AB395_RS04335	0	1000	Glycine, Serine, and Threonine Metabolism	2.1.2.1	R00945	rxn00692	GHMT; GHMT2; GHMT2r; GHMT2rm; SHM1; SHM2	GLYOHMETRANS-RXN	MNXR115952	15484	extract from iCC541
303	r_0303	SBO:0000176	succinate dehydrogenase cytochrome b	q[c] + fadh2[c] <=> qh2[c] + fad[c]	TRUE	AB395_RS16895 and AB395_RS16890 and AB395_RS16880	-1000	1000	Oxidative Phosphorylation	1.3.99.1	[]	rxn12212	[]	[]	[]	[]	extract from iCC541
304	r_0304	SBO:0000185	molybdate transport via ABC system	atp[c] + h2o[c] + mobd[e] -> h[c] + pi[c] + adp[c] + mobd[c]	FALSE	AB395_RS15955 and AB395_RS15960 and AB395_RS15965	0	1000	Transport	3.A.1.8; -3.A.1.8	[]	rxn05619	[]	[]	[]	[]	extract from iCC541
305	r_0305	SBO:0000185	iron (II) transport via ABC system	atp[c] + h2o[c] + fe2[e] -> h[c] + fe2[c] + pi[c] + adp[c]	FALSE	AB395_RS16715	0	1000	Transport	[]	[]	rxn05555	[]	[]	[]	[]	extract from iCC541
306	r_0306	SBO:0000185	phosphate transport via ABC system	atp[c] + h2o[c] + pi[e] -> h[c] + 2 pi[c] + adp[c]	FALSE	AB395_RS00655 and AB395_RS00660 and AB395_RS00665 and AB395_RS00670	0	1000	Transport	3.A.1.7; 3.A.1.7	[]	rxn05145	[]	[]	[]	[]	extract from iCC541
307	r_0307	SBO:0000176	adenylate kinase (d form)	datp[c] + damp[c] <=> 2 dadp[c]	TRUE	AB395_RS05430	-1000	1000	Purine Metabolism	2.7.4.3	[]	rxn10427	[]	[]	[]	[]	extract from iCC541
308	r_0308	SBO:0000176	protoporphyrinogen oxidase (aerobic)	1.5 o2[c] + pppg9[c] -> 3 h2o[c] + ppp9[c]	FALSE	AB395_RS20325	0	1000	Porphyrin and Chlorophyll Metabolism	1.3.3.4	[]	rxn09179	[]	[]	[]	[]	extract from iCC541
309	r_0309	SBO:0000176	g-glutamyltransferase	ala__L[c] + gthrd[c] -> cgly[c] + gluala[c]	FALSE	AB395_RS21525	0	1000	Glutathione Metabolism	2.3.2.2	R01262	rxn05952	[]	[]	[]	[]	extract from iCC541
310	r_0310	SBO:0000176	Heme O synthase	h2o[c] + pheme[c] + frdp[c] -> ppi[c] + hemeO[c]	FALSE	AB395_RS02730	0	1000	Porphyrin and Chlorophyll Metabolism	2.5.1.-	[]	rxn08707	[]	[]	[]	[]	extract from iCC541
311	r_0311	SBO:0000176	Pyridoxine 5-phosphate synthase	nad[c] + dxyl5p[c] + phthr[c] -> 2 h[c] + 2 h2o[c] + nadh[c] + pi[c] + co2[c] + pdx5p[c]	FALSE	( AB395_RS23705 or AB395_RS21590 or AB395_RS04025 ) and AB395_RS09885	0	1000	Vitamin B6 Metabolism	1.1.1.262	[]	rxn09072	[]	[]	[]	[]	extract from iCC541
312	r_0312	SBO:0000176	R04533	h[c] + nadph[c] + actACP[c] <=> nadp[c] + 3hbutACP[c]	TRUE	AB395_RS09750 and AB395_RS03985 and AB395_RS16655 and AB395_RS27030	-1000	1000	Fatty Acid Biosynthesis	1.1.1.100	R04533	[]	HBUR1	RXN-9514	MNXR94951	[]	extract from iCC541
313	r_0313	SBO:0000176	ketol-acid reductoisomerase (2-Acetolactate)	h[c] + nadph[c] + 2ahbut[c] <=> nadp[c] + 23dhmp[c]	TRUE	AB395_RS09805	-1000	1000	Valine, Leucine and Isoleucine Biosynthesis	1.1.1.86	[]	rxn08764	[]	[]	[]	[]	extract from iCC541
314	r_0314	SBO:0000185	thiamine transport	atp[c] + h2o[c] + thm[e] -> h[c] + pi[c] + adp[c] + thm[c]	FALSE	AB395_RS17485 and AB395_RS17490 and AB395_RS17495	0	1000	Transport	[]	[]	rxn05177	[]	[]	[]	[]	extract from iCC541
315	r_0315	SBO:0000176	fatty-acyl-ACP hydrolase	h2o[c] + palmACP[c] <=> h[c] + hdca[c] + ACP[c]	TRUE	AB395_RS00985	-1000	1000	Fatty Acid Biosynthesis	3.1.2.14	R01706	rxn06033	FAS1_7_f	RXN-9549	MNXR107135	30130	extract from iCC541
316	r_0316	SBO:0000176	UDP-N-acetylmuramoyl-L-alanyl-D-glutamyl-meso-2,6-diaminopimeloyl-D-alanyl-D-alanine synthetase	atp[c] + alaala[c] + ugmd[c] -> h[c] + pi[c] + adp[c] + ugmda[c]	FALSE	AB395_RS10335	0	1000	Lysine Biosynthesis	6.3.2.10	[]	rxn13914	[]	[]	[]	[]	extract from iCC541
317	r_0317	SBO:0000176	Lysyl-tRNA synthetase	atp[c] + h[c] + lys__L[c] + trnalys[c] -> ppi[c] + amp[c] + lystrna[c]	FALSE	AB395_RS19710 or AB395_RS15845	0	1000	Lysine Biosynthesis	6.1.1.6	[]	rxn08857	[]	[]	[]	[]	extract from iCC541
318	r_0318	SBO:0000176	enoyl-[acyl-carrier-protein] reductase (NADPH) (n-C16:0)	h[c] + nadph[c] + tpalm2eACP[c] -> nadp[c] + palmACP[c]	FALSE	AB395_RS02690 and AB395_RS19515	0	1000	Fatty Acid Biosynthesis	1.3.1.10	R04970	rxn08393	ETR1_7; FAS1_7_2	RXN-9542	MNXR109259	[]	extract from iCC541
319	r_0319	SBO:0000185	sulfate transport via ABC system	atp[c] + h2o[c] + so4[e] -> h[c] + pi[c] + adp[c] + so4[c]	FALSE	AB395_RS26240 and (AB395_RS26245 or AB395_RS26250) and AB395_RS26255	0	1000	Transport	[]	[]	rxn05153	[]	[]	[]	[]	extract from iCC541
320	r_0320	SBO:0000176	aminopeptidase (pro-gly)	h2o[c] + progly[c] -> gly[c] + pro__L[c]	FALSE	AB395_RS18735 or AB395_RS06470 or AB395_RS04055	0	1000	Arginine and Proline Metabolism	3.4.11.2	[]	rxn12638	[]	[]	[]	[]	extract from iCC541
321	r_0321	SBO:0000185	NAD(P) transhydrogenase	nadh[c] + nadp[c] + 2 h[e] -> 2 h[c] + nad[c] + nadph[c]	FALSE	AB395_RS06455 or AB395_RS15605 or ( AB395_RS15600 and AB395_RS15595 )	0	1000	Transport	1.6.1.1	[]	rxn10125	[]	[]	[]	[]	extract from iCC541
322	r_0322	SBO:0000176	enoyl-[acyl-carrier-protein] reductase (NADH) (n-C16:0)	h[c] + nadh[c] + tpalm2eACP[c] -> nad[c] + palmACP[c]	FALSE	AB395_RS02690 and AB395_RS19515	0	1000	Fatty Acid Biosynthesis	1.3.1.10	R04969	rxn05328	[]	RXN-9663	MNXR109258	[]	extract from iCC541
323	r_0323	SBO:0000185	ATP synthase (two protons for one ATP)	pi[c] + adp[c] + 2 h[e] -> atp[c] + h[c] + h2o[c]	FALSE	(AB395_RS02370 or AB395_RS02365) and AB395_RS02360 and AB395_RS02355 and AB395_RS16775 and AB395_RS16770 and AB395_RS16765 and AB395_RS16760 and AB395_RS16750	0	1000	Oxidative Phosphorylation	3.6.3.14	[]	rxn10443	[]	[]	[]	[]	extract from iCC541
324	r_0324	SBO:0000176	R04428	3hbutACP[c] <=> h2o[c] + but2eACP[c]	TRUE	AB395_RS19525 or AB395_RS06100 or AB395_RS08935	-1000	1000	Fatty Acid Biosynthesis	4.2.1.59	R04428	rxn05329	HBUHL1	4.2.1.58-RXN	MNXR115599	[]	extract from iCC541
325	r_0325	SBO:0000627	Succinate Exchange	succ[e] <=>	TRUE	[]	-1.38	0	Exchange	[]	[]	[]	[]	[]	[]	[]	extract from iCC541
326	r_0326	SBO:0000627	Homocitrate Exchange	homocitrate[e] <=>	TRUE	[]	-1000	1000	Exchange	[]	[]	[]	[]	[]	[]	[]	extract from iCC541
327	r_0327	SBO:0000627	Fe2 Exchange	fe2[e] <=>	TRUE	[]	-1000	1000	Exchange	[]	[]	[]	[]	[]	[]	[]	extract from iCC541
328	r_0328	SBO:0000627	Nitrogen Exchange	n2[e] <=>	TRUE	[]	-1000	1000	Exchange	[]	[]	[]	[]	[]	[]	[]	extract from iCC541
329	r_0329	SBO:0000627	CO2 Exchange	co2[e] <=>	TRUE	[]	-1000	1000	Exchange	[]	[]	[]	[]	[]	[]	[]	extract from iCC541
330	r_0330	SBO:0000627	Orthophosphate Exchange	pi[e] <=>	TRUE	[]	-1000	1000	Exchange	[]	[]	[]	[]	[]	[]	[]	extract from iCC541
331	r_0331	SBO:0000627	L-Alanine Exchange	ala__L[e] ->	FALSE	[]	0	1000	Exchange	[]	[]	[]	[]	[]	[]	[]	extract from iCC541
332	r_0332	SBO:0000627	Ammonia Exchange	nh3[e] ->	FALSE	[]	0	1000	Exchange	[]	[]	[]	[]	[]	[]	[]	extract from iCC541
333	r_0333	SBO:0000627	Sulfate Exchange	so4[e] <=>	TRUE	[]	-1000	1000	Exchange	[]	[]	[]	[]	[]	[]	[]	extract from iCC541
334	r_0334	SBO:0000627	Oxygen Exchange	o2[e] <=>	TRUE	[]	-1.26	1000	Exchange	[]	[]	[]	[]	[]	[]	[]	extract from iCC541
335	r_0335	SBO:0000627	H2O Exchange	h2o[e] <=>	TRUE	[]	-1000	1000	Exchange	[]	[]	[]	[]	[]	[]	[]	extract from iCC541
336	r_0336	SBO:0000627	H Exchange	h[e] <=>	TRUE	[]	-1000	1000	Exchange	[]	[]	[]	[]	[]	[]	[]	extract from iCC541
337	r_0337	SBO:0000627	L-Glutamate Exchange	glu__L[e] <=>	TRUE	[]	-2	1000	Exchange	[]	[]	[]	[]	[]	[]	[]	extract from iCC541
338	r_0338	SBO:0000627	Myo-Inositol Exchange	inost[e] <=>	TRUE	[]	-0.01	1000	Exchange	[]	[]	[]	[]	[]	[]	[]	extract from iCC541
339	r_0339	SBO:0000627	L-Aspartate Exchange	asp__L[e] <=>	TRUE	[]	0	1000	Exchange	[]	[]	[]	[]	[]	[]	[]	extract from iCC541
340	r_0340	SBO:0000627	L-Malate Exchange	mal__L[e] <=>	TRUE	[]	-1.44	1000	Exchange	[]	[]	[]	[]	[]	[]	[]	extract from iCC541
341	r_0341	SBO:0000627	Mg2 Exchange	mg2[e] <=>	TRUE	[]	-1000	1000	Exchange	[]	[]	[]	[]	[]	[]	[]	extract from iCC541
342	r_0342	SBO:0000627	Cob(I)alamin Exchange	cbl1[e] <=>	TRUE	[]	-1000	1000	Exchange	[]	[]	[]	[]	[]	[]	[]	extract from iCC541
343	r_0343	SBO:0000627	Molybdate Exchange	mobd[e] <=>	TRUE	[]	-1000	1000	Exchange	[]	[]	[]	[]	[]	[]	[]	extract from iCC541
344	r_0344	SBO:0000627	Thiamine Exchange	thm[e] <=>	TRUE	[]	-1000	1000	Exchange	[]	[]	[]	[]	[]	[]	[]	extract from iCC541
345	r_0345	SBO:0000176	nicotinamidase	h2o[c] + ncam[c] -> h[c] + nh3[c] + nac[c]	FALSE	AB395_RS00995	0	1000	Nicotinate and Nicotinamide	3.5.1.19	R01268	rxn00938	NNAM; NNAMr; NNAMrm; PNC1_1; PNC1_2	NICOTINAMID-RXN	MNXR101977	14546	extract from iCC541
346	r_0346	SBO:0000176	Tryptophanyl-tRNA synthetase	atp[c] + h[c] + trp__L[c] + trnatrp[c] -> ppi[c] + amp[c] + trptrna[c]	FALSE	AB395_RS00180	0	1000	Phenylalanine Tyrosine Tryptophan Biosynthesis	6.1.1.2	R03664	rxn06448	TRPTRS; TRPTRSm	TRYPTOPHAN--TRNA-LIGASE-RXN	MNXR124075	24081	extract from iCC541
347	r_0347	SBO:0000176	succinyl-diaminopimelate desuccinylase	h2o[c] + sl26da[c] -> succ[c] + 26dap_LL[c]	FALSE	AB395_RS00315	0	1000	Lysine Biosynthesis	3.5.1.18	R02734	rxn01973	SDPDS	SUCCDIAMINOPIMDESUCC-RXN	MNXR104300	22608	extract from iCC541
348	r_0348	SBO:0000176	Adenosyl cobinamide phosphate guanyltransferase	h[c] + gtp[c] + adocbip[c] -> ppi[c] + agdpcbi[c]	FALSE	AB395_RS09005	0	1000	Porphyrin Metabolism	2.7.7.62	R05222	rxn03537	ACBIPGT	COBINPGUANYLYLTRANS-RXN	MNXR95216	22712	extract from iCC541
349	r_0349	SBO:0000176	L-allo-Threonine Aldolase	athr__L[c] <=> gly[c] + acald[c]	TRUE	AB395_RS28890	-1000	1000	Glycine, Serine, and Threonine Metabolism	4.1.2.48	R06171	rxn04142	THRA2i; THRA2r; THRLAD	LTAA-RXN	MNXR104834	26209	extract from iCC541
350	r_0350	SBO:0000176	acyl-CoA dehydrogenase (decanoyl-CoA)	fad[c] + dccoa[c] <=> dc2coa[c] + fadh2[c]	TRUE	AB395_RS10600	-1000	1000	Fatty Acid Metabolism	1.3.99.3	R04754	rxn03253	ACOAD4f	[]	[]	[]	extract from iCC541
351	r_0351	SBO:0000176	riboflavin kinase	atp[c] + ribflv[c] -> adp[c] + fmn[c]	FALSE	AB395_RS02170	0	1000	Riboflavin Metabolism	2.7.1.26	R00549	rxn00392	FMN1_1; FMN1_2; RBFK; RBFKm	RIBOFLAVINKIN-RXN	MNXR103429	14358	extract from iCC541
352	r_0352	SBO:0000176	4-(cytidine 5-diphospho)-2-C-methyl-D-erythritol kinase	atp[c] + 4c2me[c] -> adp[c] + 2p4c2me[c]	FALSE	AB395_RS02410	0	1000	Terpenoid Backbone Biosynthesis	2.7.1.148	R05634	rxn03908	CDPMEK	2.7.1.148-RXN	MNXR96558	18438	extract from iCC541
353	r_0353	SBO:0000176	uroporphyrinogen decarboxylase (uroporphyrinogen III)	4 h[c] + uppg3[c] -> 4 co2[c] + cpppg3[c]	FALSE	AB395_RS17945	0	1000	Porphyrin and Chlorophyll Metabolism	4.1.1.37	R03197	rxn02288	UPPDC1	UROGENDECARBOX-RXN	MNXR105140	19866	extract from iCC541
354	r_0354	SBO:0000176	APS-reductase	h2s[c] + acser[c] -> h[c] + ac[c] + cys__L[c]	FALSE	AB395_RS07115 and AB395_RS20085	0	1000	Sulfur Metabolism	2.5.1.47	R00897	rxn00649	CYSS; CYSSr; YGR012W	ACSERLY-RXN	MNXR97007	14832	extract from iCC541
355	r_0355	SBO:0000176	guanine phosphoribosyltransferase	prpp[c] + gua[c] <=> ppi[c] + gmp[c]	TRUE	AB395_RS11505 or AB395_RS14020 or AB395_RS07020	-1000	1000	Purine Metabolism	2.4.2.8 or 2.4.2.22	R01229	rxn00915	GUAPRT; GUAPRTr; HPT1_2	GUANPRIBOSYLTRAN-RXN	MNXR100409	25427	extract from iCC541
356	r_0356	SBO:0000176	coproporphyrinogen oxidase (O2 required)	2 h[c] + o2[c] + cpppg3[c] -> 2 h2o[c] + 2 co2[c] + pppg9[c]	FALSE	AB395_RS08285	0	1000	Porphyrin and Chlorophyll Metabolism	1.3.3.3	R03220	rxn02303	CPPPGO	RXN0-1461	MNXR96880	18258	extract from iCC541
357	r_0357	SBO:0000176	enoyl-[acyl-carrier-protein] reductase (NADPH) (n-C6:0)	h[c] + nadph[c] + thex2eACP[c] -> nadp[c] + hexACP[c]	FALSE	AB395_RS02690 and AB395_RS19515 and AB395_RS06200	0	1000	Fatty Acid Biosynthesis	1.3.1.10	R04956	rxn05357	EAR60y; ETR1_2; FAS1_2_2	RXN-9521	MNXR109247	[]	extract from iCC541
358	r_0358	SBO:0000176	5-nucleotidase (UMP)	h2o[c] + ump[c] -> h[c] + pi[c] + uri[c]	FALSE	AB395_RS06250 or AB395_RS15285	0	1000	Pyrimidine Metabolism	3.1.3.5	R00963	rxn00708	NTD2; NTD2pp; U34	RXN-14025	MNXR102032	29360	extract from iCC541
359	r_0359	SBO:0000176	5-nucleotidase (CMP)	h2o[c] + cmp[c] -> h[c] + pi[c] + cytd[c]	FALSE	AB395_RS08400 or AB395_RS12220 or AB395_RS15145 or AB395_RS18930 or AB395_RS27830 or AB395_RS06250 or AB395_RS15285	0	1000	Pyrimidine Metabolism	3.1.3.-;3.1.3.5	R00511	[]	NTD4; NTD4pp; U29	RXN-14026	MNXR102034	29368	extract from iCC541
360	r_0360	SBO:0000176	enoyl-[acyl-carrier-protein] reductase (NADPH) (n-C10:0)	h[c] + nadph[c] + tdec2eACP[c] -> nadp[c] + dcaACP[c]	FALSE	AB395_RS02690 and AB395_RS19515 and AB395_RS06200	0	1000	Fatty Acid Biosynthesis	1.3.1.10	R04962	rxn05356	EAR100y; ETR1_4; FAS1_4_2	[]	[]	[]	extract from iCC541
361	r_0361	SBO:0000176	acetyl-CoA C-acyltransferase (hexanoyl-CoA)	accoa[c] + hxcoa[c] <=> coa[c] + 3oocoa[c]	TRUE	AB395_RS10495	-1000	1000	Fatty Acid Metabolism	2.3.1.16	R04747	rxn03248	ACACT3r; KAT3	RXN-14277	MNXR109092	31205	extract from iCC541
362	r_0362	SBO:0000176	Glycyl-tRNA synthetase	atp[c] + h[c] + gly[c] + trnagly[c] -> ppi[c] + amp[c] + glytrna[c]	FALSE	AB395_RS02445 or AB395_RS02465	0	1000	Aminoacyl-tRNA biosynthesis	6.1.1.14	R03654	rxn06438	GLYTRS; GRS1; GRS2	GLYCINE--TRNA-LIGASE-RXN	MNXR115938	16014	extract from iCC541
363	r_0363	SBO:0000176	NAD transhydrogenase	nad[c] + nadph[c] -> nadh[c] + nadp[c]	FALSE	AB395_RS06455 or (AB395_RS15605 and AB395_RS15600 and AB395_RS15595)	0	1000	Nicotinate and Nicotinamide	1.6.1.1	R00112	rxn00083	NADTRHD; TEST_NADTRHD; THD1; THD5	PYRNUTRANSHYDROGEN-RXN	MNXR101898	11692	extract from iCC541
364	r_0364	SBO:0000176	b-ureidopropionase	h[c] + h2o[c] + cala[c] <=> nh3[c] + co2[c] + ala_B[c]	TRUE	AB395_RS12290	-1000	1000	Pyrimidine Metabolism	3.5.1.6	R00905	rxn00654	UPPN	BETA-UREIDOPROPIONASE-RXN	MNXR96347	11185	extract from iCC541
365	r_0365	SBO:0000176	dihydrouracil dehydrogenase (NAD)	nad[c] + 56dura[c] <=> h[c] + nadh[c] + ura[c]	TRUE	AB395_RS12265	-1000	1000	Pyrimidine Metabolism	1.3.1.1	R00977	rxn00719	[]	DIHYDROURACIL-DEHYDROGENASE-NAD+-RXN	MNXR97816	20192	extract from iCC541
366	r_0366	SBO:0000176	methionine synthase	hcys__L[c] + 5mthf[c] -> thf[c] + met__L[c]	FALSE	AB395_RS09145 and AB395_RS09055 and AB395_RS16450	0	1000	Cysteine and Methionine Metabolism	2.1.1.13	R00946	rxn00693	METS; METSMHPGLUT_b; METSr; MTHFB12D; U47	HOMOCYSMETB12-RXN	MNXR115965	11173	extract from iCC541
367	r_0367	SBO:0000176	Guanosine 3-diphosphate 5-triphosphate	h2o[c] + gdptp[c] <=> h[c] + pi[c] + ppgpp[c]	TRUE	AB395_RS04230 and AB395_RS01960	-1000	1000	Purine Metabolism	3.6.1.11	R03409	rxn02449	EPPP2; GDPT; GTPDPDP	PPPGPPHYDRO-RXN	MNXR100099	13074	extract from iCC541
368	r_0368	SBO:0000176	Adenosylcobalamin 5-phosphate synthase	agdpcbi[c] + rdmbzi[c] -> gmp[c] + adocbl[c]	FALSE	AB395_RS08550	0	1000	Porphyrin Metabolism	2.7.8.26	R05223	rxn03538	ADOCBLS; COBPS	COBALAMINSYN-RXN	MNXR95469	16052	extract from iCC541
369	r_0369	SBO:0000176	5-nucleotidase (dTMP)	h2o[c] + dtmp[c] -> h[c] + pi[c] + thymd[c]	FALSE	AB395_RS08400 or AB395_RS12220 or AB395_RS15145 or AB395_RS18930 or AB395_RS27830	0	1000	Pyrimidine Metabolism	3.1.3.-	R01569	rxn01145	NTD5; NTD5pp; U25	THYMIDYLATE-5-PHOSPHATASE-RXN	MNXR102035	11080	extract from iCC541
370	r_0370	SBO:0000176	3-hydroxyacyl-CoA dehydratase (3-hydroxyhexanoyl-CoA)	3hhcoa[c] <=> h2o[c] + hx2coa[c]	TRUE	AB395_RS20255 or AB395_RS00770 or AB395_RS12855 or AB395_RS02580 or AB395_RS04705	-1000	1000	Fatty Acid Metabolism	4.2.1.17	R04749	rxn03250	ECOAH2	RXN-12567	MNXR97886	30549	extract from iCC541
371	r_0371	SBO:0000176	UDP-N-acetylmuramoyl-L-alanyl-D-glutamyl-meso-2,6-diaminopimelate synthetase	atp[c] + 26dap__M[c] + uamag[c] -> h[c] + pi[c] + adp[c] + ugmd[c]	FALSE	AB395_RS10340	0	1000	Lysine Biosynthesis	6.3.2.13	R02788	rxn02011	UAAGDS	UDP-NACMURALGLDAPLIG-RXN	MNXR107722	23677	extract from iCC541
372	r_0372	SBO:0000176	2-C-methyl-D-erythritol 2,4-cyclodiphosphate synthase	2p4c2me[c] -> 2mecdp[c] + cmp[c]	FALSE	AB395_RS05865	0	1000	Terpenoid Backbone Biosynthesis	4.6.1.12	R05637	rxn03910	MECDPS	RXN0-302	MNXR101424	23865	extract from iCC541
373	r_0373	SBO:0000176	5-nucleotidase (dCMP)	h2o[c] + dcmp[c] -> h[c] + pi[c] + dcyt[c]	FALSE	AB395_RS08400 or AB395_RS12220 or AB395_RS15145 or AB395_RS18930 or AB395_RS27830	0	1000	Pyrimidine Metabolism	3.1.3.-	R01664	rxn01218	NTD3; NTD3pp; U28	RXN0-5292	MNXR102033	29364	extract from iCC541
374	r_0374	SBO:0000176	hiamine-phosphate diphosphorylase	h[c] + 4mpetz[c] + 2mahmp[c] -> ppi[c] + thmmp[c]	FALSE	AB395_RS15160 and AB395_RS01540	0	1000	Thiamine Metabolism	2.5.1.3	R03223	rxn02305	THI6_2; TMPPP	THI-P-SYN-RXN	MNXR104908	22329	extract from iCC541
375	r_0375	SBO:0000176	glutamine-fructose-6-phosphate transaminase	gln__L[c] + f6p[c] -> glu__L[c] + gam6p[c]	FALSE	AB395_RS06955 and AB395_RS18990 and AB395_RS00605	0	1000	Alanine, Aspartate and Glutamate metabolism	2.6.1.16	R00768	rxn00555	GF6PTA; GF6PTAr; GFA1	L-GLN-FRUCT-6-P-AMINOTRANS-RXN	MNXR100107	13237	extract from iCC541
376	r_0376	SBO:0000176	2-dehydro-3-deoxy-phosphogluconate aldolase	2ddg6p[c] -> g3p[c] + pyr[c]	FALSE	AB395_RS15725	0	1000	Pentose Phosphate Pathway	4.1.2.14	R05605	rxn03884	EDA	KDPGALDOL-RXN	MNXR97897	17090	extract from iCC541
377	r_0377	SBO:0000176	Histidyl-tRNA synthetase	atp[c] + h[c] + his__L[c] + trnahis[c] -> ppi[c] + amp[c] + histrna[c]	FALSE	AB395_RS02115	0	1000	Histidine Metabolism	6.1.1.21	R03655	rxn06439	HISTRS; HISTRSm; HTS1	HISTIDINE--TRNA-LIGASE-RXN	MNXR115961	17314	extract from iCC541
378	r_0378	SBO:0000176	Seryl-tRNA synthetase	atp[c] + ser__L[c] + trnaser[c] -> ppi[c] + amp[c] + sertrna[c]	FALSE	AB395_RS06245	0	1000	Aminoacyl-tRNA biosynthesis	6.1.1.11	R03662	rxn06446	DIA1; SERTRS; SES1	SERINE--TRNA-LIGASE-RXN	MNXR123879	12293	extract from iCC541
379	r_0379	SBO:0000176	Aspartate racemase	asp__D[c] <=> asp__L[c]	TRUE	AB395_RS09855	-1000	1000	Alanine, Aspartate and Glutamate metabolism	5.1.1.13	R00491	rxn00348	ASPR; ASPRM	ASPARTATE-RACEMASE-RXN	MNXR96097	14973	extract from iCC541
380	r_0380	SBO:0000176	O-Acetyl-L-homoserine acetate-lyase (adding methanethiol)	h2s[c] + achms[c] <=> h[c] + hcys__L[c] + ac[c]	TRUE	AB395_RS04720	-1000	1000	Sulfur Metabolism	2.5.1.49	R01287	rxn00952	AHSERL2; MET17_2; MET17_3; METACH	ACETYLHOMOSER-CYS-RXN	MNXR95631	27825	extract from iCC541
381	r_0381	SBO:0000176	sulfite reductase (NADPH2)	4 h[c] + 3 nadph[c] + so3[c] -> 3 h2o[c] + 3 nadp[c] + h2s[c]	FALSE	AB395_RS05930	0	1000	Sulfur Metabolism	1.8.2.1	R00858	rxn00623	ECM17; MET10; SULR; SULRi	SULFITE-REDUCT-RXN	MNXR104650	13803	extract from iCC541
382	r_0382	SBO:0000176	Methionyl-tRNA synthetase	atp[c] + met__L[c] + trnamet[c] -> ppi[c] + amp[c] + mettrna[c]	FALSE	AB395_RS07940	0	1000	Cysteine and Methionine Metabolism	6.1.1.10	R03659	rxn06443	MES1; METTRS; METTRSm; MSM1	METHIONINE--TRNA-LIGASE-RXN	MNXR116054	13482	extract from iCC541
383	r_0383	SBO:0000176	5-nucleotidase (XMP)	h2o[c] + xmp[c] -> h[c] + pi[c] + xtsn[c]	FALSE	AB395_RS06250 or AB395_RS15285	0	1000	Purine Metabolism	3.1.3.5	R02719	rxn01961	NTD10; NTD10pp; U33	XMPXAN-RXN	MNXR102029	28531	extract from iCC541
384	r_0384	SBO:0000176	acetyl-CoA C-acyltransferase (decanoyl-CoA)	accoa[c] + dccoa[c] <=> coa[c] + 3oddcoa[c]	TRUE	AB395_RS10495	-1000	1000	Fatty Acid Metabolism	2.3.1.16	R04742	rxn03243	ACACT5p; ACACT5r; KAT5	RXN-14274	MNXR95200	31185	extract from iCC541
385	r_0385	SBO:0000176	acyl-CoA dehydrogenase (hexadecanoyl-CoA)	pmtcoa[c] + fad[c] -> hdd2coa[c] + fadh2[c]	FALSE	AB395_RS10600	0	1000	Fatty Acid Metabolism	1.3.99.3	R01279	rxn00946	ACOAD7f	[]	[]	[]	extract from iCC541
386	r_0386	SBO:0000176	cytidylate kinase (CMP)	atp[c] + cmp[c] <=> adp[c] + cdp[c]	TRUE	AB395_RS19575	-1000	1000	Pyrimidine Metabolism	2.7.4.25	R00512	rxn00364	CYTK1; U18	RXN-11832	MNXR97047	11600	extract from iCC541
387	r_0387	SBO:0000176	acyl-CoA dehydrogenase (hexanoyl-CoA)	fad[c] + hxcoa[c] <=> fadh2[c] + hx2coa[c]	TRUE	AB395_RS10600	-1000	1000	Fatty Acid Metabolism	1.3.99.3	R04751	rxn03251	ACOAD2f	RXN-14278	MNXR118595	31208	extract from iCC541
388	r_0388	SBO:0000176	S-adenosylhomocysteine nucleosidase	h2o[c] + ahcys[c] -> ade[c] + rhcys[c]	FALSE	AB395_RS19930	0	1000	Cysteine and Methionine Metabolism	3.2.2.9	R00194	rxn00143	AHCYSNS	ADENOSYLHOMOCYSTEINE-NUCLEOSIDASE-RXN	MNXR95625	17806	extract from iCC541
389	r_0389	SBO:0000176	FMN adenylyltransferase	atp[c] + fmn[c] -> ppi[c] + fad[c]	FALSE	AB395_RS02170	0	1000	Riboflavin Metabolism	2.7.7.2	R00161	rxn00122	FAD1; FMNAT; FMNATm; FMNATr; U80	FADSYN-RXN	MNXR95501	17238	extract from iCC541
390	r_0390	SBO:0000176	phosphoserine phosphatase (L-serine)	h2o[c] + pser__L[c] -> h[c] + pi[c] + ser__L[c]	FALSE	AB395_RS10055	0	1000	Glycine, Serine, and Threonine Metabolism	3.1.3.3	R00582	rxn00420	PSP_L; PSP_Lpp; SER2	RXN0-5114	MNXR103260	21209	extract from iCC541
391	r_0391	SBO:0000176	dATP:pyruvate O2-phosphotransferase	pep[c] + dadp[c] <=> pyr[c] + datp[c]	TRUE	AB395_RS15210	-1000	1000	Purine Metabolism	2.7.1.40	R01138	rxn00840	[]	RXN-14192	MNXR97145	30730	extract from iCC541
392	r_0392	SBO:0000176	pyruvate carboxylase	atp[c] + pyr[c] + hco3[c] -> h[c] + pi[c] + adp[c] + oaa[c]	FALSE	AB395_RS17615	0	1000	Glycolysis / Gluconeogenesis	6.4.1.1	R00344	rxn00250	PC; PYC1; PYC2	PYRUVATE-CARBOXYLASE-RXN	MNXR102391	20845	extract from iCC541
393	r_0393	SBO:0000176	acyl-CoA dehydrogenase (dodecanoyl-CoA)	h[c] + fad[c] + ddcacoa[c] <=> fadh2[c] + dd2coa[c]	TRUE	AB395_RS10600	-1000	1000	Fatty Acid Metabolism	1.3.99.3	R03857	rxn02720	ACOAD5f	RXN-14262	MNXR118590	47296	extract from iCC541
394	r_0394	SBO:0000176	L-serine ammonia-lyase	ser__L[c] <=> pyr[c] + nh3[c] + h[c]	TRUE	AB395_RS07065 or AB395_RS20530	-1000	1000	Glycine, Serine, and Threonine Metabolism	4.3.1.19	R00220	[]	CHA1_2; SERD_L; SERD_Lr; SER_AL; YIL167W	4.3.1.17-RXN	MNXR104339	19170	extract from iCC541
395	r_0395	SBO:0000176	5-nucleotidase	h2o[c] + nicrnt[c] -> h[c] + pi[c] + nicrns[c]	FALSE	AB395_RS06250 or AB395_RS15285 or AB395_RS08400 or AB395_RS12220 or AB395_RS15145 or AB395_RS18930 or AB395_RS27830	0	1000	Nicotinate and Nicotinamide	3.1.3.5 or 3.1.3.-	R03346	rxn02400	[]	RXN-14227	MNXR102027	30938	extract from iCC541
396	r_0396	SBO:0000176	Alanyl-tRNA synthetase	atp[c] + h[c] + ala__L[c] + trnaala[c] -> ppi[c] + amp[c] + alatrna[c]	FALSE	AB395_RS08110	0	1000	Aminoacyl-tRNA biosynthesis	6.1.1.7	R03038	rxn06300	ALA1; ALATRS	ALANINE--TRNA-LIGASE-RXN	MNXR115678	12541	extract from iCC541
397	r_0397	SBO:0000176	dCTP deaminase	h2o[c] + ctp[c] -> nh3[c] + utp[c]	FALSE	AB395_RS00720	0	1000	Pyrimidine Metabolism	3.5.4.13	R00568	rxn00407	DCTPD2	RXN-14118	MNXR97202	30338	extract from iCC541
398	r_0398	SBO:0000176	Phenylalanyl-tRNA synthetase	atp[c] + h[c] + phe__L[c] + trnaphe[c] -> ppi[c] + amp[c] + phetrna[c]	FALSE	AB395_RS19785 or AB395_RS19790	0	1000	Phenylalanine Tyrosine Tryptophan Biosynthesis	6.1.1.20	R03660	rxn06444	MSF1; PHETRS; PHETRSm	PHENYLALANINE--TRNA-LIGASE-RXN	MNXR116123	19414	extract from iCC541
399	r_0399	SBO:0000176	glycine C-acetyltransferase	accoa[c] + gly[c] <=> coa[c] + 2aobut[c]	TRUE	AB395_RS11125	-1000	1000	Glycine, Serine, and Threonine Metabolism	2.3.1.29	R00371	rxn00274	GLYAT; GLYATRi; GLYATi	AKBLIG-RXN	MNXR100313	20736	extract from iCC541
400	r_0400	SBO:0000176	acetyl-CoA C-acyltransferase (octanoyl-CoA)	accoa[c] + occoa[c] <=> coa[c] + 3odcoa[c]	TRUE	AB395_RS10495	-1000	1000	Fatty Acid Metabolism	2.3.1.16	R03778	rxn02680	ACACT4p; ACACT4r; KAT4	RXN-13617	MNXR95198	31089	extract from iCC541
401	r_0401	SBO:0000176	sulfate adenylyltransferase	atp[c] + h[c] + so4[c] <=> ppi[c] + aps[c]	TRUE	AB395_RS02995 and AB395_RS03000	-1000	1000	Sulfur Metabolism	2.7.7.4	R00529	rxn00379	MET3; SADT; SADT1r	SULFATE-ADENYLYLTRANS-RXN	MNXR104240	18136	extract from iCC541
402	r_0402	SBO:0000176	5-nucleotidase (dTMP)	h2o[c] + nmn[c] -> h[c] + pi[c] + rnam[c]	FALSE	AB395_RS06250 or AB395_RS15285 or AB395_RS08400 or AB395_RS12220 or AB395_RS15145 or AB395_RS18930 or AB395_RS27830	0	1000	Nicotinate and Nicotinamide	3.1.3.5 or 3.1.3.-	R02323	rxn01670	NIRP; NMNR	RXN-5841	MNXR101970	30816	extract from iCC541
403	r_0403	SBO:0000176	3-phosphoshikimate 1-carboxyvinyltransferase	pep[c] + skm5p[c] <=> h[c] + pi[c] + 3psme[c]	TRUE	AB395_RS19555	-1000	1000	Phenylalanine Tyrosine Tryptophan Biosynthesis	2.5.1.19	R03460	rxn02476	ARO1_5; PSCVT; PSCVTi	2.5.1.19-RXN	MNXR103226	21259	extract from iCC541
404	r_0404	SBO:0000176	anthranilate synthase	gln__L[c] + chor[c] -> h[c] + glu__L[c] + pyr[c] + anth[c]	FALSE	AB395_RS11620	0	1000	Phenylalanine Tyrosine Tryptophan Biosynthesis	4.1.3.27	R00986	rxn00727	ANS; ANS1; TRP2_1; TRP3_1	ANTHRANSYN-RXN	MNXR95843	21735	extract from iCC541
405	r_0405	SBO:0000176	enoyl-[acyl-carrier-protein] reductase (NADPH) (n-C4:0)	h[c] + nadph[c] + but2eACP[c] -> nadp[c] + butACP[c]	FALSE	AB395_RS02690 and AB395_RS19515 and AB395_RS06200	0	1000	Fatty Acid Biosynthesis	1.3.1.10	R04430	rxn05353	EAR40y	[]	[]	[]	extract from iCC541
406	r_0406	SBO:0000176	phosphoglycerate mutase	2pg[c] <=> 3pg[c]	TRUE	AB395_RS18800	-1000	1000	Glycolysis / Gluconeogenesis	5.4.2.11	R01518	rxn01106	GPM1_2; GPM2; GPM3; PGM	3PGAREARR-RXN	[]	15904	extract from iCC541
407	r_0407	SBO:0000176	tyrosyl-tRNA synthetase	atp[c] + h[c] + tyr__L[c] + trnatyr[c] -> ppi[c] + amp[c] + tyrtrna[c]	FALSE	AB395_RS07610	0	1000	Phenylalanine Tyrosine Tryptophan Biosynthesis	6.1.1.1	R02918	rxn06280	MSY1; TYRTRS; TYRTRSm; TYS1	TYROSINE--TRNA-LIGASE-RXN	MNXR124080	10221	extract from iCC541
408	r_0408	SBO:0000176	hydroxymethylpyrimidine kinase (ATP)	atp[c] + 4ahmmp[c] -> adp[c] + 4ampm[c]	FALSE	AB395_RS09110	0	1000	Thiamine Metabolism	2.7.1.49	R03471	rxn02484	HMPK1; THI20_1; THI21; THI22	OHMETPYRKIN-RXN	MNXR100664	23097	extract from iCC541
409	r_0409	SBO:0000176	dihydrofolate synthase	atp[c] + glu__L[c] + dhpt[c] -> h[c] + pi[c] + adp[c] + dhf[c]	FALSE	AB395_RS18110	0	1000	Folate Biosynthesis	6.3.2.12	R02237	rxn01603	DHFS; U89	DIHYDROFOLATESYNTH-RXN	MNXR140043	23585	extract from iCC541
410	r_0410	SBO:0000176	IMP cyclohydrolase	h2o[c] + imp[c] <=> fprica[c]	TRUE	AB395_RS17830	-1000	1000	Purine Metabolism	3.5.4.10	R01127	rxn00832	ADE16_2; ADE17_2; IMPC; IMPCir	IMPCYCLOHYDROLASE-RXN	MNXR100783	18448	extract from iCC541
411	r_0411	SBO:0000176	fumarase	h2o[c] + fum[c] <=> mal__L[c]	TRUE	AB395_RS01005 or AB395_RS08410	-1000	1000	TCA Cycle	4.2.1.2	R01082	rxn00799	FUM; FUM1_1; FUM1_2; FUMm	FUMHYDR-RXN	MNXR99705	12463	extract from iCC541
412	r_0412	SBO:0000176	enoyl-[acyl-carrier-protein] reductase (NADPH) (n-C8:0)	h[c] + nadph[c] + toct2eACP[c] -> nadp[c] + ocACP[c]	FALSE	AB395_RS02690 and AB395_RS19515 and AB395_RS06200	0	1000	Fatty Acid Biosynthesis	1.3.1.10	R04959	rxn05352	EAR80y; ETR1_3; FAS1_3_2	RXN-9526	MNXR109250	[]	extract from iCC541
413	r_0413	SBO:0000176	Cysteinyl-tRNA synthetase	atp[c] + h[c] + cys__L[c] + trnacys[c] -> ppi[c] + amp[c] + cystrna[c]	FALSE	AB395_RS03835	0	1000	Aminoacyl-tRNA biosynthesis	6.1.1.16	R03650	rxn06435	CYSTRS; YNL247W	CYSTEINE--TRNA-LIGASE-RXN	MNXR115795	17774	extract from iCC541
414	r_0414	SBO:0000176	glutathione oxidoreductase	h[c] + nadph[c] + gthox[c] <=> nadp[c] + 2 gthrd[c]	TRUE	AB395_RS08385	-1000	1000	Glutathione Metabolism	1.8.1.7	R00115	rxn00086	GLR1; GTHO; GTHOm; GTHOr; GTHRD	GLUTATHIONE-REDUCT-NADPH-RXN	MNXR100098	11742	extract from iCC541
415	r_0415	SBO:0000176	phosphoribosylaminoimidazolecarboxamide formyltransferase	10fthf[c] + aicar[c] -> thf[c] + fprica[c]	FALSE	AB395_RS17830	0	1000	Purine Metabolism	2.1.2.3	R04560	rxn03137	ADE16_1; ADE17_1; AICART	AICARTRANSFORM-RXN	MNXR115676	22195	extract from iCC541
416	r_0416	SBO:0000176	pantothenate kinase	atp[c] + ptcys[c] <=> adp[c] + 4ppcys[c]	TRUE	AB395_RS18200	-1000	1000	Pantothenate and CoA Biosynthesis	2.7.1.33	R04391	rxn12510	PNTK; YDR531W	PANTOTHENATE-KIN-RXN	MNXR103050	16374	extract from iCC541
417	r_0417	SBO:0000176	5-nucleotidase (GMP)	h2o[c] + gmp[c] -> h[c] + pi[c] + gsn[c]	FALSE	AB395_RS08400 or AB395_RS12220 or AB395_RS15145 or AB395_RS18930 or AB395_RS27830	0	1000	Purine Metabolism	3.1.3.-	R01227	rxn00913	NTD9; NTD9pp; U31	RXN-7609	MNXR100381	27715	extract from iCC541
418	r_0418	SBO:0000176	catalase	2 h2o2[c] -> 2 h2o[c] + o2[c]	FALSE	AB395_RS05110 or AB395_RS25255	0	1000	Phenylalanine Tyrosine Tryptophan Biosynthesis	1.11.1.6 or 1.11.1.21	R00009	rxn00006	CAT; CATp; CTA1; CTT1	CATAL-RXN	MNXR96455	20310	extract from iCC541
419	r_0419	SBO:0000176	glutamate-5-semialdehyde dehydrogenase	nadph[c] + glu5p[c] <=> nadp[c] + pi[c] + glu5sa[c]	FALSE	AB395_RS17075	-1000	1000	Arginine and Proline Metabolism	1.2.1.41	R03313	rxn02373	G5SD	GLUTSEMIALDEHYDROG-RXN	MNXR99896	19543	extract from iCC541
420	r_0420	SBO:0000176	enolase	2pg[c] <=> h2o[c] + pep[c]	TRUE	AB395_RS05795	-1000	1000	Glycolysis / Gluconeogenesis	4.2.1.11	R00658	rxn00459	ENO; ENO1; ENO2; ERR1_1; ERR1_2; ERR2	2PGADEHYDRAT-RXN	MNXR97932	10167	extract from iCC541
421	r_0421	SBO:0000176	indole-3-glycerol-phosphate synthase	h[c] + 2cpr5p[c] -> h2o[c] + co2[c] + 3ig3p[c]	FALSE	AB395_RS06925	0	1000	Phenylalanine Tyrosine Tryptophan Biosynthesis	4.1.1.48	R03508	rxn02507	[]	IGPSYN-RXN	MNXR100814	23477	extract from iCC541
422	r_0422	SBO:0000176	2-C-methyl-D-erythritol 4-phosphate cytidylyltransferase	2me4p[c] + ctp[c] -> ppi[c] + 4c2me[c]	FALSE	AB395_RS05865	0	1000	Terpenoid Backbone Biosynthesis	2.7.7.60	R05633	rxn03907	MEPCT	2.7.7.60-RXN	MNXR96807	13429	extract from iCC541
423	r_0423	SBO:0000176	pantetheine kinase	atp[c] + ptth[c] <=> adp[c] + pan4p[c]	TRUE	AB395_RS18200	-1000	1000	Pantothenate and CoA Biosynthesis	2.7.1.33	R02971	rxn02128	PTHKr	PANTETHEINE-KINASE-RXN	MNXR95885	22472	extract from iCC541
424	r_0424	SBO:0000176	GTP diphosphokinase	atp[c] + gtp[c] -> amp[c] + gdptp[c]	FALSE	AB395_RS03645	0	1000	Purine Metabolism	2.7.6.5	R00429	rxn00303	GTPDPK	GTPPYPHOSKIN-RXN	MNXR100457	22089	extract from iCC541
425	r_0425	SBO:0000176	phosphoribosylformylglycinamidine synthase	atp[c] + h2o[c] + gln__L[c] + fgam[c] -> h[c] + glu__L[c] + pi[c] + adp[c] + fpram[c]	FALSE	AB395_RS07990 and AB395_RS08000 and AB395_RS08020	0	1000	Purine Metabolism	6.3.5.3	R04463	rxn03084	ADE6; PRFGS	FGAMSYN-RXN	MNXR139278	17129	extract from iCC541
426	r_0426	SBO:0000176	sirohydrochlorin dehydrogenase (NAD)	nad[c] + dscl[c] -> h[c] + nadh[c] + scl[c]	FALSE	AB395_RS05920	0	1000	Porphyrin Metabolism	1.3.1.76	R03947	rxn02774	SHCHD2	DIMETHUROPORDEHYDROG-RXN	MNXR104373	15613	extract from iCC541
427	r_0427	SBO:0000176	phosphoserine transaminase reversible	glu__L[c] + 3php[c] <=> akg[c] + pser__L[c]	TRUE	AB395_RS14585	-1000	1000	Glycine, Serine, and Threonine Metabolism	2.6.1.52	R04173	rxn02914	PSERT; PSERTr; SER1_1	PSERTRANSAM-RXN	MNXR103225	14332	extract from iCC541
428	r_0428	SBO:0000176	Threonyl-tRNA synthetase	atp[c] + thr__L[c] + trnathr[c] -> ppi[c] + amp[c] + thrtrna[c]	FALSE	AB395_RS05700	0	1000	Aminoacyl-tRNA biosynthesis	6.1.1.3	R03663	rxn06447	MST1; THRTRS; THRTRSm; THS1	THREONINE--TRNA-LIGASE-RXN	MNXR123912	24625	extract from iCC541
429	r_0429	SBO:0000176	5-nucleotidase (IMP)	h2o[c] + imp[c] -> h[c] + pi[c] + ins[c]	FALSE	AB395_RS08400 or AB395_RS12220 or AB395_RS15145 or AB395_RS18930 or AB395_RS27830	0	1000	Purine Metabolism	3.1.3.-	R01126	rxn00831	NTD11; NTD11pp; U32	RXN-7607	MNXR102030	27719	extract from iCC541
430	r_0430	SBO:0000176	acyl-CoA dehydrogenase (tetradecanoyl-CoA)	fad[c] + tdcoa[c] <=> fadh2[c] + td2coa[c]	TRUE	AB395_RS10600	-1000	1000	Fatty Acid Metabolism	1.3.99.3	R03990	rxn02803	ACOAD6f	[]	[]	[]	extract from iCC541
431	r_0431	SBO:0000176	Methionyl-tRNA formyltransferase	10fthf[c] + mettrna[c] -> h[c] + thf[c] + fmettrna[c]	FALSE	AB395_RS00300 and AB395_RS05400	0	1000	One carbon pool by folate	2.1.2.9	R03940	rxn06538	FMETTRS; FMETTRSm; FMT1	METHIONYL-TRNA-FORMYLTRANSFERASE-RXN	MNXR116055	24381	extract from iCC541
432	r_0432	SBO:0000176	Glutamyl-tRNA synthetase	atp[c] + h[c] + glu__L[c] + trnaglu[c] -> ppi[c] + amp[c] + glutrna[c]	FALSE	AB395_RS15840	0	1000	Alanine, Aspartate and Glutamate metabolism	6.1.1.17	R05578	rxn06937	GLUTRS; GLUTRSm	GLURS-RXN	MNXR115926	23541	extract from iCC541
433	r_0433	SBO:0000176	5-amino-6-(5-phosphoribosylamino)uracil reductase	h[c] + nadph[c] + 5apru[c] <=> nadp[c] + 5aprbu[c]	TRUE	AB395_RS04345	-1000	1000	Riboflavin Metabolism	1.1.1.193	R03458	rxn02474	APRAUR; RIB7_2	RIBOFLAVINSYNREDUC-RXN	MNXR95898	17847	extract from iCC541
434	r_0434	SBO:0000176	Isoleucyl-tRNA synthetase	atp[c] + h[c] + ile__L[c] + trnaile[c] -> ppi[c] + amp[c] + iletrna[c]	FALSE	AB395_RS02175	0	1000	Valine, Leucine and Isoleucine Biosynthesis	6.1.1.5	R03656	rxn06440	ILETRS; ILETRSm; ILS1	ISOLEUCINE--TRNA-LIGASE-RXN	MNXR115986	11061	extract from iCC541
435	r_0435	SBO:0000176	5-nucleotidase (dGMP)	h2o[c] + dgmp[c] -> h[c] + pi[c] + dgsn[c]	FALSE	AB395_RS06250 or AB395_RS15285	0	1000	Purine Metabolism	3.1.3.5	R01968	rxn01445	NTD8; NTD8pp; U27	RXN-14142	MNXR102038	29382	extract from iCC541
436	r_0436	SBO:0000176	L-Arogenate hydro-lyase	h[c] + Largn[c] -> h2o[c] + co2[c] + phe__L[c]	FALSE	AB395_RS19390	0	1000	Phenylalanine Tyrosine Tryptophan Biosynthesis	4.2.1.51	R00691	rxn00490	[]	CARBOXYCYCLOHEXADIENYL-DEHYDRATASE-RXN	MNXR95958	12537	extract from iCC541
437	r_0437	SBO:0000176	Aspartyl-tRNA synthetase	atp[c] + h[c] + asp__L[c] + trnaasp[c] -> ppi[c] + amp[c] + asptrna[c]	FALSE	AB395_RS04265	0	1000	Alanine, Aspartate and Glutamate metabolism	6.1.1.12	R05577	rxn06936	ASPTRS; ASPTRSm; DPS1; MSD1	ASPARTATE--TRNA-LIGASE-RXN	MNXR115727	19650	extract from iCC541
438	r_0438	SBO:0000176	acetyl-CoA C-acyltransferase (dodecanoyl-CoA)	h[c] + accoa[c] + ddcacoa[c] <=> coa[c] + 3otdcoa[c]	TRUE	AB395_RS10495	-1000	1000	Fatty Acid Metabolism	2.3.1.16	R03858	rxn06510	ACACT6p; ACACT6r; KAT6	RXN-14268	MNXR95201	31093	extract from iCC541
439	r_0439	SBO:0000176	phosphoglucomutase	g1p[c] <=> g6p[c]	TRUE	AB395_RS15525	-1000	1000	Glycolysis / Gluconeogenesis	5.4.2.2	R00959	rxn00704	PGM1_2; PGM2_2; PGMT	PHOSPHOGLUCMUT-RXN	[]	23539	extract from iCC541
440	r_0440	SBO:0000176	aspartate carbamoyltransferase	asp__L[c] + cbp[c] -> 2 h[c] + pi[c] + cbasp[c]	FALSE	AB395_RS05050	0	1000	Alanine, Aspartate and Glutamate metabolism	2.1.3.2	R01397	rxn01018	ASPCT; ASPCTn; URA2_1	ASPCARBTRANS-RXN	MNXR96080	20016	extract from iCC541
441	r_0441	SBO:0000176	Valyl-tRNA synthetase	atp[c] + h[c] + val__L[c] + trnaval[c] -> ppi[c] + amp[c] + valtrna[c]	FALSE	AB395_RS06160	0	1000	Valine, Leucine and Isoleucine Biosynthesis	6.1.1.9	R03665	rxn06449	VALTRS; VALTRSm; VAS1	VALINE--TRNA-LIGASE-RXN	MNXR124096	10705	extract from iCC541
442	r_0442	SBO:0000176	phosphopantothenoylcysteine decarboxylase	h[c] + 4ppcys[c] <=> co2[c] + pan4p[c]	TRUE	AB395_RS20215	-1000	1000	Pantothenate and CoA Biosynthesis	4.1.1.36	R03269	rxn02341	PPCDC; U93	P-PANTOCYSDECARB-RXN	MNXR103098	16794	extract from iCC541
443	r_0443	SBO:0000176	O-Phospho-4-hydroxy-L-threonine:2-oxoglutarate aminotransferase	glu__L[c] + ohpb[c] <=> akg[c] + phthr[c]	TRUE	AB395_RS14585	-1000	1000	Vitamin B6 Metabolism	2.6.1.52	R05085	rxn03445	OHPBAT; SER1_2	PSERTRANSAMPYR-RXN	MNXR102169	16576	extract from iCC541
444	r_0444	SBO:0000176	acetyl-CoA carboxylase, reversible reaction	atp[c] + accoa[c] + hco3[c] <=> h[c] + pi[c] + adp[c] + malcoa[c]	TRUE	AB395_RS14155 and AB395_RS18105 and AB395_RS29400	-1000	1000	Fatty Acid Biosynthesis	6.4.1.2	R00742	rxn00533	ACC1; ACCOAC; ACCOACr; ACCOACrm	ACETYL-COA-CARBOXYLTRANSFER-RXN	MNXR95219	11309	extract from iCC541
445	r_0445	SBO:0000176	adenylosuccinate synthase	gtp[c] + asp__L[c] + imp[c] -> 2 h[c] + pi[c] + gdp[c] + dcamp[c]	FALSE	AB395_RS14570	0	1000	Alanine, Aspartate and Glutamate metabolism	6.3.4.4	R01135	rxn00838	ADE12; ADSS; ADSS_i	ADENYLOSUCCINATE-SYNTHASE-RXN	MNXR95495	15753	extract from iCC541
446	r_0446	SBO:0000176	hypoxanthine phosphoribosyltransferase (Hypoxanthine)	prpp[c] + hxan[c] <=> ppi[c] + imp[c]	TRUE	AB395_RS14020	-1000	1000	Purine Metabolism	2.4.2.8	R01132	rxn00836	HPT1_1; HXPRT; HXPRTr	HYPOXANPRIBOSYLTRAN-RXN	MNXR100752	17973	extract from iCC541
447	r_0447	SBO:0000176	5,10-methylenetetrahydrofolate reductase (NADH)	h[c] + nadh[c] + mlthf[c] -> nad[c] + 5mthf[c]	FALSE	AB395_RS10435	0	1000	One carbon pool by folate	1.5.1.20	R07168	rxn04954	MTHFR2	1.5.1.20-RXN	MNXR114983	[]	extract from iCC541
448	r_0448	SBO:0000176	enoyl-[acyl-carrier-protein] reductase (NADPH) (n-C14:0)	h[c] + nadph[c] + tmrs2eACP[c] -> nadp[c] + myrsACP[c]	FALSE	AB395_RS02690 and AB395_RS19515 and AB395_RS06200	0	1000	Fatty Acid Biosynthesis	1.3.1.10	R04967	rxn05351	ETR1_6; FAS1_6_2	RXN-9538	MNXR109256	[]	extract from iCC541
449	r_0449	SBO:0000176	dihydrodipicolinate reductase (NADPH)	h[c] + nadph[c] + 23dhdp[c] -> nadp[c] + thdp[c]	FALSE	AB395_RS18795	0	1000	Lysine Biosynthesis	1.3.1.26	R04199	rxn02929	DHDPRy	RXN-14014	MNXR108728	35333	extract from iCC541
450	r_0450	SBO:0000176	dCTP deaminase	h2o[c] + dctp[c] -> nh3[c] + dutp[c]	FALSE	AB395_RS00720	0	1000	Pyrimidine Metabolism	3.5.4.13	R02325	rxn01672	DCD1_2; DCTPD	DCTP-DEAM-RXN	MNXR97201	22681	extract from iCC541
451	r_0451	SBO:0000176	sirohydrochlorin ferrochetalase	fe2[c] + scl[c] -> 2 h[c] + sheme[c]	FALSE	AB395_RS05920	0	1000	Porphyrin Metabolism	4.99.1.4	R02864	rxn02056	SHCHF	SIROHEME-FERROCHELAT-RXN	MNXR104375	24361	extract from iCC541
452	r_0452	SBO:0000176	GMP synthase	atp[c] + h2o[c] + gln__L[c] + xmp[c] -> h[c] + ppi[c] + glu__L[c] + amp[c] + gmp[c]	FALSE	AB395_RS17215 and AB395_RS19925	0	1000	Purine Metabolism	6.3.5.2	R01231	rxn00917	GMPS2; GUA1	GMP-SYN-GLUT-RXN	MNXR100384	11681	extract from iCC541
453	r_0453	SBO:0000176	pyruvate dehydrogenase (lipoamide)	h[c] + pyr[c] + lpam[c] -> co2[c] + adhlam[c]	FALSE	AB395_RS05805 and AB395_RS05810	0	1000	Glycolysis / Gluconeogenesis	1.2.4.1	R01699	rxn01242	PDA1; PDHa	RXN0-1134	MNXR123105	[]	extract from iCC541
454	r_0454	SBO:0000176	uroporphyrinogen methyltransferase	2 amet[c] + uppg3[c] -> 2 h[c] + 2 ahcys[c] + dscl[c]	FALSE	AB395_RS05920 or AB395_RS08970	0	1000	Porphyrin and Chlorophyll Metabolism	2.1.1.107	R03194	rxn02287	UPP3MT	RXN-13403	MNXR105137	32460	extract from iCC541
455	r_0455	SBO:0000176	Arginyl-tRNA synthetase	atp[c] + h[c] + arg__L[c] + trnaarg[c] -> ppi[c] + amp[c] + argtrna[c]	FALSE	AB395_RS06200	0	1000	Arginine biosynthesis	6.1.1.19	R03646	rxn06432	ARGTRS; ARGTRSm; MSR1; YDR341C	ARGININE--TRNA-LIGASE-RXN	MNXR115706	20302	extract from iCC541
456	r_0456	SBO:0000176	methylenetetrahydrofolate dehydrogenase (NADP)	nadp[c] + mlthf[c] <=> nadph[c] + methf[c]	TRUE	AB395_RS01630 and AB395_RS30835	-1000	1000	One carbon pool by folate	1.5.1.5	R01220	rxn00907	ADE3_1; MIS1_1; MTHFD; MTHFDm	METHYLENETHFDEHYDROG-NADP-RXN	MNXR116057	22815	extract from iCC541
457	r_0457	SBO:0000176	glutathione synthetase	atp[c] + gly[c] + glucys[c] -> h[c] + pi[c] + adp[c] + gthrd[c]	FALSE	AB395_RS20075	0	1000	Glutathione Metabolism	6.3.2.3	R00497	rxn00351	GSH2; GTHS	GLUTATHIONE-SYN-RXN	MNXR100450	13558	extract from iCC541
458	r_0458	SBO:0000176	acyl-CoA dehydrogenase (octanoyl-CoA)	fad[c] + occoa[c] <=> fadh2[c] + oc2coa[c]	TRUE	AB395_RS10600	-1000	1000	Fatty Acid Metabolism	1.3.99.3	R03777	rxn02679	ACOAD3f	RXN-14229	MNXR118568	30944	extract from iCC541
459	r_0459	SBO:0000176	phosphogluconate dehydrogenase	nadp[c] + 6pgc[c] -> nadph[c] + co2[c] + ru5p__D[c]	FALSE	AB395_RS08835	0	1000	Pentose Phosphate Pathway	1.1.1.44	R01528	rxn01115	GND; GND1; GND2; PGDH; PGDHr	RXN-9952	MNXR100389	10117	extract from iCC541
460	r_0460	SBO:0000176	methylmalonate-semialdehyde dehydrogenase (malonic semialdehyde)	nad[c] + coa[c] + msa[c] -> nadh[c] + co2[c] + accoa[c]	FALSE	AB395_RS01795	0	1000	Inositol Phosphate Metabolism	1.2.1.28	R00705	rxn00501	MMSAD3	RXN-2902	MNXR101665	22993	extract from iCC541
461	r_0461	SBO:0000176	acetyl-CoA C-acyltransferase (tetradecanoyl-CoA)	accoa[c] + tdcoa[c] <=> coa[c] + 3ohdcoa[c]	TRUE	AB395_RS10495	-1000	1000	Fatty Acid Metabolism	2.3.1.155	R03991	rxn02804	ACACT7p; ACACT7r; KAT7	2.3.1.155-RXN	[]	18163	extract from iCC541
462	r_0462	SBO:0000176	Thioredoxin reductase (NADPH) reversible	h[c] + nadph[c] + trdox[c] <=> nadp[c] + trdrd[c]	TRUE	(AB395_RS07770 and AB395_RS02985 and AB395_RS07595) or AB395_RS07770	-1000	1000	Pyrimidine Metabolism	1.6.4.5 or 1.8.1.9	R02016	rxn05289	TRDR; TRDRm	THIOREDOXIN-REDUCT-NADPH-RXN	MNXR104766	20345	extract from iCC541
463	r_0463	SBO:0000176	5-nucleotidase (AMP)	h2o[c] + amp[c] -> h[c] + pi[c] + adn[c]	FALSE	AB395_RS06250 or AB395_RS15285	0	1000	Purine Metabolism	3.1.3.5	R00183	rxn00132	NTD7; NTD7pp; U30	AMP-DEPHOSPHORYLATION-RXN	MNXR102037	29376	extract from iCC541
464	r_0464	SBO:0000176	glyceraldehyde-3-phosphate dehydrogenase	nad[c] + pi[c] + g3p[c] <=> nadh[c] + 13dpg[c]	TRUE	AB395_RS15040	-1000	1000	Glycolysis / Gluconeogenesis	1.2.1.12	R01061	rxn00781	GAPD; GAPD_NAD	GAPOXNPHOSPHN-RXN	MNXR100040	10303	extract from iCC541
465	r_0465	SBO:0000176	Leucyl-tRNA synthetase	atp[c] + h[c] + leu__L[c] + trnaleu[c] -> ppi[c] + amp[c] + leutrna[c]	FALSE	AB395_RS17890	0	1000	Valine, Leucine and Isoleucine Biosynthesis	6.1.1.4	R03657	rxn06441	CDC60; LEUTRS; LEUTRSm; NAM2	LEUCINE--TRNA-LIGASE-RXN	MNXR116020	11689	extract from iCC541
466	r_0466	SBO:0000176	enoyl-[acyl-carrier-protein] reductase (NADPH) (n-C12:0)	h[c] + nadph[c] + tddec2eACP[c] -> nadp[c] + ddcaACP[c]	FALSE	AB395_RS02690 and AB395_RS19515 and AB395_RS06200	0	1000	Fatty Acid Biosynthesis	1.3.1.10	R04725	rxn05355	EAR120y; ETR1_5; FAS1_5_2	RXN-9534	MNXR109081	[]	extract from iCC541
467	r_0467	SBO:0000176	3-dehydroquinate dehydratase	3dhq[c] <=> h2o[c] + 3dhsk[c]	TRUE	AB395_RS05155	-1000	1000	Phenylalanine Tyrosine Tryptophan Biosynthesis	4.2.1.10	R03084	rxn02213	ARO1_2; DHQD; DHQD1; DHQTi	3-DEHYDROQUINATE-DEHYDRATASE-RXN	MNXR97449	21099	extract from iCC541
468	r_0468	SBO:0000176	glutamate synthase (NADPH)	h[c] + gln__L[c] + nadph[c] + akg[c] -> 2 glu__L[c] + nadp[c]	FALSE	AB395_RS15385 or AB395_RS15380	0	1000	Nitrogen Metabolism	1.4.1.13	R00114	rxn00085	GLUSy	GLUTAMATESYN-RXN	MNXR100291	15503	extract from iCC541
469	r_0469	SBO:0000176	guanosine-3,5-bis(diphosphate) 3-diphosphatase	h2o[c] + ppgpp[c] -> ppi[c] + gdp[c]	FALSE	AB395_RS03645	0	1000	Purine Metabolism	3.1.7.2	R00336	rxn00242	G35DP; GDPDP3PH; PPGPP; PPGPPDP	PPGPPSYN-RXN	MNXR103109	14254	extract from iCC541
470	r_0470	SBO:0000176	5-nucleotidase (dAMP)	h2o[c] + damp[c] <=> h[c] + pi[c] + dad_2[c]	TRUE	AB395_RS06250 or AB395_RS15285	-1000	1000	Purine Metabolism	3.1.3.5	R02088	rxn01507	NTD6; NTD6pp; U26	RXN-14161	MNXR102036	29374	extract from iCC541
471	r_0471	SBO:0000176	succinate-semialdehyde dehydrogenase (NADP)	h2o[c] + nadp[c] + sucsal[c] -> 2 h[c] + nadph[c] + succ[c]	FALSE	AB395_RS00745 and AB395_RS06205 and AB395_RS18025	0	1000	Nitrogen Metabolism	1.2.1.79	R00714	rxn00509	SSALy; SSALyr; YBR006W	SUCCSEMIALDDEHYDROG-RXN	MNXR104541	13214	extract from iCC541
472	r_0472	SBO:0000176	carbamoyl-phosphate synthase (glutamine-hydrolysing)	2 atp[c] + h2o[c] + gln__L[c] + hco3[c] -> h[c] + glu__L[c] + pi[c] + 2 adp[c] + cbp[c]	FALSE	(AB395_RS07815 or AB395_RS26120) and AB395_RS11155	0	1000	Alanine, Aspartate and Glutamate metabolism	6.3.5.5	R00575	rxn00414	CBPS; CBPSn	CARBPSYN-RXN	MNXR96485	18634	extract from iCC541
473	r_0473	SBO:0000176	phosphomethylpyrimidine kinase	atp[c] + 4ampm[c] -> adp[c] + 2mahmp[c]	FALSE	AB395_RS09110	0	1000	Thiamine Metabolism	2.7.4.7	R04509	rxn03108	PMPK; THI20_2	PYRIMSYN3-RXN	MNXR103045	19894	extract from iCC541
474	r_0474	SBO:0000176	hydroxymethylbilane synthase	h2o[c] + 4 ppbng[c] -> 4 h[c] + 4 nh3[c] + hmbil[c]	FALSE	AB395_RS17240	0	1000	Porphyrin and Chlorophyll Metabolism	2.5.1.61	R00084	rxn00060	HEM3; HMBS	OHMETHYLBILANESYN-RXN	MNXR100658	13185	extract from iCC541
475	r_0475	SBO:0000176	oxoglutarate dehydrogenase (dihydrolipoamide S-succinyltransferase)	coa[c] + sdhlam[c] -> succoa[c] + dhlam[c]	FALSE	AB395_RS16835	0	1000	TCA Cycle	2.3.1.61	R02570	rxn01872	AKGDb; AKGDbm; AKGDbr	RXN0-1147	MNXR123108	[]	extract from iCC541
476	r_0476	SBO:0000176	acetylornithine transaminase	akg[c] + acorn[c] <=> glu__L[c] + acg5sa[c]	TRUE	AB395_RS00690	-1000	1000	Arginine biosynthesis	2.6.1.11	R02283	rxn01637	ACOTA; ACOTAim; ARG8	ACETYLORNTRANSAM-RXN	MNXR95388	18052	extract from iCC541
477	r_0477	SBO:0000176	succinyldiaminopimelate transaminase	akg[c] + sl26da[c] <=> glu__L[c] + sl2a6o[c]	TRUE	AB395_RS00690	-1000	1000	Lysine Biosynthesis	2.6.1.17	R04475	rxn03087	SDPTA	SUCCINYLDIAMINOPIMTRANS-RXN	MNXR104301	11963	extract from iCC541
478	r_0478	SBO:0000176	Prolyl-tRNA synthetase	atp[c] + h[c] + pro__L[c] + trnapro[c] -> ppi[c] + amp[c] + protrna[c]	FALSE	AB395_RS04940	0	1000	Aminoacyl-tRNA biosynthesis	6.1.1.15	R03661	rxn06445	PROTRS; YHR020W	PROLINE--TRNA-LIGASE-RXN	MNXR116156	14306	extract from iCC541
479	r_0479	SBO:0000176	O-succinylhomoserine lyase (elimination), reversible	h2o[c] + suchms[c] <=> 2 h[c] + nh3[c] + 2obut[c] + succ[c]	TRUE	AB395_RS12595	-1000	1000	Cysteine and Methionine Metabolism	2.5.1.48	R00999	rxn00740	SHSL4; SHSL4r; YML082W	METBALT-RXN	MNXR104384	[]	extract from iCC541
480	r_0480	SBO:0000176	O-succinylhomoserine lyase (L-cysteine)	suchms[c] + cys__L[c] -> h[c] + cyst__L[c] + succ[c]	FALSE	AB395_RS12595	0	1000	Cysteine and Methionine Metabolism	2.5.1.48	R02508	rxn01816	SHSL1r	[]	[]	[]	extract from iCC541
481	r_0481	SBO:0000176	metb1 (rev)	cys__L[c] + achms[c] <=> h[c] + ac[c] + cyst__L[c]	TRUE	AB395_RS12595	-1000	1000	Cysteine and Methionine Metabolism	4.4.1.11	R03217	rxn02302	METB1; METB1r; SHSL5	[]	[]	[]	extract from iCC541
482	r_0482	SBO:0000176	arginine decarboxylase	h[c] + arg__L[c] -> co2[c] + agm[c]	FALSE	AB395_RS15690	0	1000	Arginine and Proline Metabolism	4.1.1.19	R00566	rxn00405	ARGDC; ARGDCpp	ARGDECARBOX-RXN	MNXR95940	17644	extract from iCC541
483	r_0483	SBO:0000176	(R)-4'-phosphopantothenate:L-cysteine ligase	ctp[c] + 4ppan[c] + cys__L[c] <=> cmp[c] + ppi[c] + 4ppcys[c]	TRUE	AB395_RS20215	-1000	1000	Pantothenate and CoA Biosynthesis	6.3.2.5	R04231	[]	PPNCL2; U92	P-PANTOCYSLIG-RXN	MNXR103119	25157	extract from iCC541
484	r_0484	SBO:0000176	Glutamate Decarboxylase	h[c] + glu__L[c] -> co2[c] + 4abut[c]	FALSE	AB395_RS22095	0	1000	Nitrogen Metabolism	4.1.1.15	R00261	rxn00194	GAD1; GLUDC	GLUTDECARBOX-RXN	MNXR95942	17786	extract from iCC541
485	r_0485	SBO:0000176	oxoglutarate dehydrogenase (lipoamide)	h[c] + akg[c] + lpam[c] <=> co2[c] + sdhlam[c]	TRUE	AB395_RS16840	-1000	1000	TCA Cycle	1.2.4.2	R01700	rxn01243	AKGDa; AKGDam	[]	[]	[]	extract from iCC541
486	r_0486	SBO:0000176	L-3-aminoisobutyrate transaminase	glu__L[c] + mmtsa[c] <=> akg[c] + 3aib[c]	TRUE	AB395_RS11710 and AB395_RS17680	-1000	1000	Pyrimidine Metabolism	2.6.1.18	R04188	rxn02926	[]	2.6.1.22-RXN	MNXR108721	13993	extract from iCC541
487	r_0487	SBO:0000176	alpha-ribazole 5-phosphate phosphatase	h2o[c] + 5prdmbz[c] -> h[c] + pi[c] + rdmbzi[c]	FALSE	AB395_RS08960	0	1000	Porphyrin Metabolism	3.1.3.73	R04594	rxn03150	RBZP; RZ5PP	[]	[]	[]	extract from iCC541
488	r_0488	SBO:0000176	Pyridoxal 5-phosphate phosphatase	h2o[c] + pydx5p[c] -> h[c] + pi[c] + pydx[c]	FALSE	AB395_RS23560	0	1000	Vitamin B6 Metabolism	3.1.3.74	R00173	rxn00123	PYDXPP	3.1.3.74-RXN	MNXR103368	20534	extract from iCC541
489	r_0489	SBO:0000176	pantothenoylcysteine decarboxylase	h[c] + ptcys[c] <=> co2[c] + ptth[c]	TRUE	AB395_RS18200	-1000	1000	Pantothenate and CoA Biosynthesis	4.1.1.30	R02972	rxn02129	PNCDC	PANTOTHENOYLCYSTEINE-DECARBOXYLASE-RXN	MNXR103047	15077	extract from iCC541
490	r_0490	SBO:0000176	glutamyl-tRNA reductase	h[c] + nadph[c] + glutrna[c] -> nadp[c] + glu1sa[c] + trnaglu[c]	FALSE	AB395_RS13980	0	1000	Porphyrin and Chlorophyll Metabolism	1.2.1.70	R04109	rxn06591	GLUTRR	GLUTRNAREDUCT-RXN	MNXR115933	12346	extract from iCC541
491	r_0491	SBO:0000176	isocitrate dehydrogenase (NAD)	nad[c] + icit[c] <=> nadh[c] + co2[c] + akg[c]	TRUE	AB395_RS08090	-1000	1000	TCA Cycle	1.1.1.42	R00709	rxn00505	ICDHxi; ICDHxm; IDH1	ISOCITRATE-DEHYDROGENASE-NAD+-RXN	MNXR115984	23632	extract from iCC541
492	r_0492	SBO:0000176	glutathione peridoxase	h2o2[c] + 2 gthrd[c] -> 2 h2o[c] + gthox[c]	FALSE	AB395_RS08385	0	1000	Glutathione Metabolism	1.8.1.7	R00274	rxn00205	GPX1; GPX2; GSHPO; GTHP; GTHPe; GTHPm; HYR1	GLUTATHIONE-PEROXIDASE-RXN	MNXR100446	16834	extract from iCC541
493	r_0493	SBO:0000176	adenylyl-sulfate kinase	2 gthrd[c] + aps[c] -> amp[c] + so3[c] + gthox[c]	FALSE	AB395_RS26140	0	1000	Sulfur Metabolism	2.7.1.25	R05717	rxn03983	[]	1.8.4.9-RXN	MNXR100441	14143	extract from iCC541
494	r_0494	SBO:0000176	Pyridoxine 5-phosphate phosphatase	h2o[c] + pdx5p[c] -> h[c] + pi[c] + pydxn[c]	FALSE	AB395_RS23560	0	1000	Vitamin B6 Metabolism	3.1.3.74	R01911	rxn01398	PDXPP	RXN-14181	MNXR102440	25113	extract from iCC541
495	r_0495	SBO:0000176	phosphofructokinase	atp[c] + f6p[c] -> adp[c] + fdp[c]	FALSE	AB395_RS10390	0	1000	Glycolysis / Gluconeogenesis	2.7.1.90	R00756	rxn00545	PFK; PFK1_1; PFK2	6PFRUCTPHOS-RXN	MNXR102513	16110	extract from iCC541
496	r_0496	SBO:0000176	phosphoribosylaminoimidazole carboxylase	co2[c] + air[c] <=> h[c] + 5aizc[c]	TRUE	AB395_RS15185 and AB395_RS15190	-1000	1000	Purine Metabolism	4.1.1.21	R04209	rxn02938	ADE2; AIRCr	AIRCARBOXY-RXN	MNXR108735	10794	extract from iCC541
497	r_0497	SBO:0000176	NAD synthase (glutamine-hydrolysing)	atp[c] + h2o[c] + gln__L[c] + dnad[c] -> ppi[c] + glu__L[c] + nad[c] + amp[c]	FALSE	AB395_RS22445 or AB395_RS08360	0	1000	Nicotinate and Nicotinamide	6.3.1.5 or 6.3.5.1	R00257	rxn00190	NADS2; NADS2i	NAD-SYNTH-GLN-RXN	MNXR97678	24385	extract from iCC541
498	r_0498	SBO:0000176	Cytidine hydrolase	h2o[c] + cytd[c] -> csn[c] + rib__D[c]	FALSE	AB395_RS15860	0	1000	Pyrimidine Metabolism	3.2.2.8	R02137	rxn01541	CYTDH; PYRNS2	RXN0-361	MNXR97040	27959	extract from iCC541
499	r_0499	SBO:0000176	inorganic diphosphatase	ppi[c] + h2o[c] -> 2 h[c] + 2 pi[c]	FALSE	AB395_RS17195	0	1000	Oxidative Phosphorylation	3.6.1.1	R00004	rxn00001	IPP1; PPA; PPA_1; PPAm	INORGPYROPHOSPHAT-RXN	MNXR100808	24576	extract from iCC541
500	r_0500	SBO:0000176	dihydoorotic acid dehydrogenase	o2[c] + dhor__S[c] <=> orot[c] + h2o2[c]	TRUE	AB395_RS00845	-1000	1000	Pyrimidine Metabolism	1.3.98.1	R01867	rxn01360	DHORD; DHORD1; DHORDfum; DHORDi; URA1	RXN-9929	MNXR97425	30062	extract from iCC541
501	r_0501	SBO:0000176	[acyl-carrier-protein] phosphodiesterase	h2o[c] + ACP[c] -> apoACP[c] + pan4p[c]	FALSE	AB395_RS23560	0	1000	Pantothenate and CoA Biosynthesis	3.1.4.14	R01623	rxn06022	[]	3.1.4.14-RXN	MNXR107094	20538	extract from iCC541
502	r_0502	SBO:0000176	dihydrothymin dehydrogenase (NADP)	nadp[c] + 56dthm[c] <=> h[c] + nadph[c] + thym[c]	TRUE	AB395_RS12265	-1000	1000	Pyrimidine Metabolism	1.3.1.2	R01415	rxn01028	[]	RXN-11209	MNXR97815	[]	extract from iCC541
503	r_0503	SBO:0000176	pyridoxamine-5-phosphate phosphohydrolase	h2o[c] + pyam5p[c] -> h[c] + pi[c] + pydam[c]	FALSE	AB395_RS23560	0	1000	Vitamin B6 Metabolism	3.1.3.74	R02494	rxn01808	HYPOE; PYDAMP; U84	RXN-14046	MNXR100763	25137	extract from iCC541
504	r_0504	SBO:0000176	ATP_CMP_phosphotransferase	atp[c] + dcmp[c] <=> adp[c] + dcdp[c]	TRUE	AB395_RS19575	-1000	1000	Pyrimidine Metabolism	2.7.4.25	R01665	rxn01219	CYTK2; U17	RXN-7913	MNXR97053	25095	extract from iCC541
505	r_0505	SBO:0000627	Fixed ammonia Exchange	fixedNH3[e] <=>	TRUE	[]	-1000	1000	Exchange	[]	[]	[]	[]	[]	[]	[]	extract from iCC541
506	r_0506	SBO:0000185	Fixed ammonia transport	fixedNH3[c] -> fixedNH3[e]	FALSE	[]	0	1000	Transport; Symbiosis	[]	[]	[]	[]	[]	[]	[]	extract from iCC541
507	r_0507	SBO:0000176	Symbiosis cofactors	atp[c] + Iron[c] + pi[c] + nac[c] + pydxn[c] + adocbl[c] + mg2[c] + homocitrate[c] + mobd[c] + hemeO[c] + thm[c] + gthox[c] + zn2[c] -> Symbiotic_Cofactors[c]	FALSE	spontaneous	0	1000	Symbiosis	[]	[]	[]	[]	[]	[]	[]	extract from iCC541
508	R_BIOMASS_0508	SBO:0000629	Symbiosis reaction	0.816736 hdca[c] + 0.816736 ura[c] + 0.816736 asp__L[c] + 0.816736 ile__L[c] + 0.816736 ala__L[c] + 0.816736 ade[c] + 0.816736 arg__L[c] + 0.816736 val__L[c] + 0.816736 glycogen[c] + 0.816736 fixedNH3[c] + 0.00816736 Symbiotic_Cofactors[c] + 0.816736 phb[c] <=> 0.816736 ala__L[e] + 0.816736 asp__L[e] + 0.816736 fixedNH3[e] + 0.816736 glycogen1[c] + Symbiotic_product[c]	TRUE	[]	-1000	1000	Symbiosis	[]	[]	[]	[]	[]	[]	[]	extract from iCC541
509	r_0509	SBO:0000185	Zinc transport	zn2[c] <=> zn2[e]	TRUE	[]	-1000	1000	Transport; Symbiosis	[]	[]	[]	[]	[]	[]	[]	extract from iCC541
510	r_0510	SBO:0000627	Zinc Exchange	zn2[e] <=>	TRUE	[]	-1000	1000	Exchange	[]	[]	[]	[]	[]	[]	[]	extract from iCC541
511	r_0511	SBO:0000176	H2 diffusion out	h2[c] -> h2[e]	FALSE	[]	0	1000	Transport; Symbiosis	[]	[]	[]	[]	[]	[]	[]	extract from iCC541
512	r_0512	SBO:0000627	H2 Exchange	h2[e] <=>	TRUE	[]	-1000	1000	Exchange	[]	[]	[]	[]	[]	[]	[]	extract from iCC541
513	r_0513	SBO:0000176	PHB synthase	3hbcoaR[c] -> coa[c] + phb[c]	FALSE	AB395_RS06480	0	1000	PHB synthesis	2.3.1.-	R04254	[]	[]	[]	[]	[]	extract from iCC541
514	r_0514	SBO:0000176	PHB depolymerase	h2o[c] + 2 phb[c] -> h[c] + 3hbbRR[c]	FALSE	AB395_RS18075	0	1000	PHB synthesis	3.1.1.75	R05118	[]	[]	[]	[]	[]	extract from iCC541
515	r_0515	SBO:0000176	acetoacetyl-CoA reductase	h[c] + aacoa[c] + nadph[c] <=> nadp[c] + 3hbcoaR[c]	TRUE	AB395_RS17535	-1000	1000	PHB synthesis; Butanoate metabolism; Glyoxylate and dicarboxylate metabolism	1.1.1.36	R01977	[]	[]	RXN-5901	MNXR107256	45798	extract from iCC541
516	r_0516	SBO:0000176	hydroxybutyrate-dimer hydrolase;	h2o[c] + 3hbbRR[c] <=> h[c] + 2 bhb[c]	TRUE	[]	-1000	1000	PHB synthesis; Butanoate metabolism	3.1.1.22	R00048	rxn00038	[]	HYDROXYBUTYRATE-DIMER-HYDROLASE-RXN	MNXR106357	10172	extract from iCC541
517	r_0517	SBO:0000176	Demand reaction Symbiotic product	atp[c] + h[c] + coa[c] + acac[c] -> ppi[c] + aacoa[c] + amp[c]	FALSE	AB395_RS01765	0	1000	PHB synthesis; Valine, leucine and isoleucine degradation; Butanoate metabolism	6.2.1.16	R01357	[]	ACAC	ACETOACETATE--COA-LIGASE-RXN	MNXR95136	16117	extract from iCC541
518	r_0518	SBO:0000176	(R)-3-Hydroxybutanoate:NAD+ oxidoreductase	nad[c] + bhb[c] <=> h[c] + nadh[c] + acac[c]	TRUE	AB395_RS11790	-1000	1000	PHB synthesis	1.1.1.30	R01361	rxn00992	3HBUTDH; BDH	3-HYDROXYBUTYRATE-DEHYDROGENASE-RXN	MNXR96232	20524	extract from iCC541
519	r_0519	SBO:0000176	3-oxoacid CoA-transferase	succoa[c] + acac[c] <=> aacoa[c] + succ[c]	TRUE	[]	-1000	1000	PHB synthesis; Valine, leucine and isoleucine degradation; Butanoate metabolism	2.8.3.5	R00410	rxn00290	OCOAT1; OCOAT1r	RXNI-2	MNXR102148	25483	extract from iCC541
520	r_0520	SBO:0000632	Sink reaction for glycogen	glycogen1[c] <=>	TRUE	[]	-1000	1000	Transport	[]	[]	[]	[]	[]	[]	[]	extract from iCC541
521	r_0521	SBO:0000176	Malate NADP oxidoreductase	nadp[c] + mal__L[c] -> nadph[c] + co2[c] + pyr[c]	FALSE	AB395_RS00155	0	1000	Pyruvate metabolism	1.1.1.40	R00216	[]	MAE1; ME2; ME2m	MALIC-NADP-RXN	MNXR101443	18254	extract from iCC541
522	r_0522	SBO:0000176	Glycogen phosphorylase	h[c] + pi[c] + glycogen[c] <=> g1p[c] + glycogen1[c]	TRUE	AB395_RS02965 or AB395_RS15505	-1000	1000	Glycogen synthesis	2.4.1.1	[]	rxn05740	[]	[]	[]	[]	extract from iCC541
523	r_0523	SBO:0000176	thchd acylhydrolase	h2o[c] + dkdi[c] -> h[c] + 5ddglcn[c]	FALSE	AB395_RS20190	0	1000	Inositol Phosphate Metabolism	3.7.1.22	R08603	rxn12147	R08504	RXN-14149	MNXR139624	25839	extract from iCC541
524	r_0524	SBO:0000176	5ddglcn aldose-ketose-isomerase	5ddglcn[c] -> d5kg[c]	FALSE	AB395_RS20175	0	1000	Inositol Phosphate Metabolism	5.3.1.30	R08503	rxn12146	R08503	RXN-14150	MNXR112047	25841	extract from iCC541
525	r_0525	SBO:0000176	L-Glutamate:NAD oxidoreductase	h2o[c] + glu__L[c] + nad[c] <=> 2 h[c] + nh3[c] + nadh[c] + akg[c]	TRUE	AB395_RS17820	-1000	1000	Arginine biosynthesis; Alanine, aspartate and glutamate metabolism	1.4.1.2; 1.4.1.3	R00243	rxn00182	GDH2; GLUDx; GLUDxi	GLUTAMATE-DEHYDROGENASE-RXN	MNXR100085	15136	extract from iCC541
526	r_0526	SBO:0000176	L-Glutamate:NADP oxidoreductase	h2o[c] + glu__L[c] + nadp[c] <=> 2 h[c] + nh3[c] + nadph[c] + akg[c]	TRUE	AB395_RS26035	-1000	1000	Arginine biosynthesis; Alanine, aspartate and glutamate metabolism	1.4.1.4; 1.4.1.3	R00248	[]	GDH1; GDH3; GLUDy; GLUDyi	GLUTDEHYD-RXN	MNXR100086	11615	extract from iCC541
527	r_0527	SBO:0000176	4-phospho-D-erythronate NAD 2-oxidoreductase	nad[c] + 4per[c] <=> h[c] + nadh[c] + ohpb[c]	TRUE	AB395_RS19980	-1000	1000	Vitamin B6 Metabolism	1.1.1.290	R04210	rxn02939	PERD	ERYTHRON4PDEHYDROG-RXN	MNXR102495	18830	extract from iCC541
528	r_0528	SBO:0000176	L-aspartate:oxygen oxidoreductase	o2[c] + asp__L[c] -> h[c] + h2o2[c] + iasp[c]	FALSE	AB395_RS03775	0	1000	Nicotinate and Nicotinamide	1.4.3.16	R00481	rxn00338	ASPO6	L-ASPARTATE-OXID-RXN	MNXR96094	25877	extract from iCC541
529	r_0529	SBO:0000176	glycerone phosphate:iminosuccinate alkyltransferase	dhap[c] + iasp[c] -> h[c] + 2 h2o[c] + pi[c] + quln[c]	FALSE	AB395_RS03770	0	1000	Nicotinate and Nicotinamide	2.5.1.72	R04292	rxn02988	QULNS; U100	QUINOLINATE-SYNTHA-RXN	MNXR103400	25889	extract from iCC541
530	r_0530	SBO:0000628	Demand reaction Symbiotic product	Symbiotic_product[c] ->	FALSE	[]	0	1000	Transport	[]	[]	[]	[]	[]	[]	[]	extract from iCC541
531	r_0531	SBO:0000185	Zinc-ABC transport	atp[c] + h2o[c] + zn2[e] -> h[c] + pi[c] + adp[c] + zn2[c]	FALSE	AB395_RS08730 and AB395_RS08725 and AB395_RS08720	0	1000	Transport	[]	[]	[]	[]	[]	[]	[]	extract from iCC541
532	r_0532	SBO:0000185	Phosphate reversible transport via symport	h[e] + pi[e] <=> h[c] + pi[c]	TRUE	AB395_RS18865	-1000	1000	Transport	[]	[]	[]	[]	[]	[]	[]	extract from iCC541
533	r_0533	SBO:0000176	5-deoxyadenosine nuclosidase	dad_5[c] + h2o[c] -> 5drib[c] + ade[c]	FALSE	[]	0	1000	[]	[]	[]	rxn08013	[]	[]	[]	[]	extract from iCC541
534	r_0534	SBO:0000628	Sink to allow 5-deoxyribose to leave system	5drib[c] ->	FALSE	[]	0	1000	Transport	[]	[]	[]	[]	[]	[]	[]	extract from iCC541
535	r_0535	SBO:0000176	carbon monoxide dehydrogenase	h2o[c] + co[c] + 2 fdxox[c] -> co2[c] + 2 h[c] + 2 fdxrd[c]	FALSE	[]	0	1000	[]	[]	[]	[]	[]	[]	[]	[]	extract from iCC541
536	r_0536	SBO:0000176	transphosphorylating;phosphoenolpyruvate-forming	atp[c] + oaa[c] + h[c] -> adp[c] + pep[c] + co2[c]	FALSE	AB395_RS18180	0	1000	Glycolysis / Gluconeogenesis;TCA Cycle	4.1.1.49	R00341	rxn00247	PCK1; PPCK; PPCKr	PEPCARBOXYKIN-RXN	MNXR103099	18618	new reaction
537	r_0537	SBO:0000176	ATP:D-glucose 6-phosphotransferase	atp[c] + g1p[c] -> adp[c] + g6p[c]	FALSE	AB395_RS18785	0	1000	Glycolysis / Gluconeogenesis	2.7.1.2	R00299	rxn00216	GLK1_1; HEX1; HXK1_2; HXK2_2	GLUCOKIN-RXN	MNXR100612	17825	new reaction
538	r_0538	SBO:0000176	Acetaldehyde:NADP+ oxidoreductase	acald[c] + nadp[c] + h2o[c] <=> ac[c] + nadph[c] + 2 h[c]	TRUE	AB395_RS01795 or AB395_RS20490 or AB395_RS26800 or AB395_RS26810 or AB395_RS28880	-1000	1000	Glycolysis / Gluconeogenesis	1.2.1.-	R00711	rxn00216	GLK1_1; HEX1; HXK1_2; HXK2_2	RXN0-3962	MNXR95750	25299	new reaction
539	r_0539	SBO:0000176	ethanol:NAD+ oxidoreductase	acald[c] + nadh[c] + h[c] <=> etoh[c] + nad[c]	TRUE	AB395_RS01995	-1000	1000	Glycolysis / Gluconeogenesis	1.1.1.1	R00754	rxn00543	ADH1; ADH2; ADH3; ADH4; ADH5; ALCD1; ALCD2if; ALCD2ir; ALCD2irm; ALCD2m; ALCD2x; SFA1_2	ALCOHOL-DEHYDROG-RXN	MNXR95725	25293	new reaction
540	r_0540	SBO:0000176	2-deoxy-D-ribose-5-phosphate acetaldehyde-lyase (D-glyceraldehyde-3-phosphate-forming)	2dr5p[c] <=> g3p[c] + acald[c]	TRUE	AB395_RS25120	-1000	1000	Pentose Phosphate Pathway	4.1.2.4	R01066	rxn00784	DRPA; DRPAr	DEOXYRIBOSE-P-ALD-RXN	MNXR97787	12824	new reaction
541	r_0541	SBO:0000176	beta-D-Glucose:NADP+ 1-oxoreductase	g1p[c] + nadp[c] <=> 15gl[c] + nadph[c] + h[c]	TRUE	AB395_RS20620	-1000	1000	Pentose Phosphate Pathway	1.1.1.47	R01521	rxn01109	[]	GLUCOSE-1-DEHYDROGENASE-NADP+-RXN	MNXR110846	14408	new reaction
542	r_0542	SBO:0000176	beta-D-Glucose:NAD+ 1-oxoreductase	g1p[c] + nad[c] <=> 15gl[c] + nadh[c] + h[c]	TRUE	AB395_RS20620	-1000	1000	Pentose Phosphate Pathway	1.1.1.47	R01520	rxn01108	[]	[]	[]	[]	new reaction
543	r_0543	SBO:0000176	ATP:D-gluconate 6-phosphotransferase	atp[c] + glcn[c] -> adp[c] + 6pgc[c]	FALSE	AB395_RS20990	0	1000	Pentose Phosphate Pathway	2.7.1.12	R01737	rxn01275	GNK; GNKr	GLUCONOKIN-RXN	MNXR100390	19434	new reaction
544	r_0544	SBO:0000176		pail35p_cho[c] + h2o[c] -> pail3p_cho[c] + pi[c]	FALSE	AB395_RS08400 or AB395_RS12220 or AB395_RS15145 or AB395_RS18930 or AB395_RS27830	0	1000	Inositol Phosphate Metabolism	3.1.3.-	R12124	[]	[]	[]	[]	[]	new reaction
545	r_0545	SBO:0000176		pail4p_cho[c] + h2o[c] -> pail_cho[c] + pi[c]	FALSE	AB395_RS08400 or AB395_RS12220 or AB395_RS15145 or AB395_RS18930 or AB395_RS27830	0	1000	Inositol Phosphate Metabolism	3.1.3.-	R11680	[]	[]	[]	[]	[]	new reaction
546	r_0546	SBO:0000176		2ins[c] + nad[c] -> 3desins[c] + nadh[c] + h[c]	FALSE	AB395_RS00480 or AB395_RS08760 or AB395_RS09800 or AB395_RS12225 or AB395_RS18840 or AB395_RS21780 or AB395_RS23700	0	1000	Inositol Phosphate Metabolism	1.1.1.-	R11770	[]	[]	[]	[]	[]	new reaction
547	r_0547	SBO:0000176	scyllo-inositol:NADP+ oxidoreductase	syinost[c] + nadp[c] -> 2ins[c] + nadph[c] + h[c]	FALSE	AB395_RS00480 or AB395_RS08760 or AB395_RS09800 or AB395_RS12225 or AB395_RS18840 or AB395_RS21780 or AB395_RS23700	0	1000	Inositol Phosphate Metabolism	1.1.1.-	R09954	rxn16801	[]	RXN-14347	MNXR113350	39066	new reaction
548	r_0548	SBO:0000176	5-amino-1-(5-phospho-D-ribosyl)imidazole formate-lyase (decarboxylating, 4-amino-2-methyl-5-phosphomethylpyrimidine-forming)	air[c] + amet[c] -> 4ampm[c] + dad_5[c] + met__L[c] + for[c] + co[c] + h2o[c]	FALSE	AB395_RS28125	0	1000	Thiamine Metabolism	4.1.99.17	R03472	rxn02485	[]	PYRIMSYN1-RXN	MNXR108194	24841	new reaction
549	r_0549	SBO:0000176	2-methyl-4-amino-5-hydroxymethylpyrimidine-diphosphate:2-(2-carboxy-4-methylthiazol-5-yl)ethyl phosphate 2-methyl-4-aminopyrimidine-5-methenyltransferase	2mahmp[c] + cthzp[c] -> thmmp[c] + ppi[c] + co2[c]	FALSE	AB395_RS28145	0	1000	Thiamine Metabolism	2.5.1.3	R10712	rxn23042	[]	RXN-12610	MNXR114031	47849	new reaction
550	r_0550	SBO:0000176	glycine:oxygen oxidoreductase	gly[c] + o2[c] -> imgly[c] + h2o2[c]	FALSE	AB395_RS28130	0	1000	Thiamine Metabolism	1.4.3.19	R07463	rxn07295	[]	RXN-12614	MNXR111096	33344	new reaction
551	r_0551	SBO:0000176	1-deoxy-D-xylulose 5-phosphate:thiol sulfurtransferase	dxyl5p[c] + imgly[c] + thiosul[c] -> 2c4mthzep[c] + scp[c] + 2 h2o[c]	FALSE	AB395_RS28140	0	1000	Thiamine Metabolism	2.8.1.10	R10247	rxn40102	[]	THIAZOLSYN2-RXN	MNXR123908	26300	new reaction
552	r_0552	SBO:0000176	Thiamin diphosphate phosphohydrolase	thmpp[c] + h2o[c] <=> thmmp[c] + pi[c]	TRUE	AB395_RS16785 or AB395_RS17110 or AB395_RS21070	-1000	1000	Thiamine Metabolism	3.6.1.-	R00615	rxn00436	TDP	RXN0-3542	MNXR104756	28001	new reaction
553	r_0553	SBO:0000176	ATP:thiamine diphosphotransferase	atp[c] + thm[c] -> amp[c] + thmpp[c]	FALSE	AB395_RS17475	0	1000	Thiamine Metabolism	2.7.6.2	R00619	rxn00440	THI80_1; TMDPK	THIAMIN-PYROPHOSPHOKINASE-RXN	MNXR104886	11577	new reaction
554	r_0554	SBO:0000176	ADP:thiamin-diphosphate phosphotransferase	thmpp[c] + adp[c] -> thmtp[c] + amp[c]	FALSE	AB395_RS05430	0	1000	Thiamine Metabolism	2.7.4.3	R11319	[]	[]	[]	[]	[]	new reaction
555	r_0555	SBO:0000176	FAD nucleotidohydrolase	fad[c] + h2o[c] <=> amp[c] + fmn[c]	TRUE	AB395_RS05910	-1000	1000	Riboflavin Metabolism	3.6.1.9	R00160	rxn00121	[]	FAD-PYROPHOSPHATASE-RXN	MNXR99209	13890	new reaction
556	r_0556	SBO:0000176	prenyl diphosphate diphosphate phosphohydrolase	dmpp[c] + h2o[c] <=> dmp[c] + pi[c]	TRUE	AB395_RS16785 or AB395_RS17110 or AB395_RS21070	-1000	1000	Riboflavin Metabolism	3.6.1.-	R12896	[]	[]	[]	[]	[]	new reaction
557	r_0557	SBO:0000176		pl[c] + atp[c] <=> dmp[c] + adp[c]	TRUE	AB395_RS00575 or AB395_RS01340 or AB395_RS12215 or AB395_RS21990 or AB395_RS23535 or AB395_RS25370	-1000	1000	Riboflavin Metabolism	2.7.1.-	R12897	[]	[]	[]	[]	[]	new reaction
558	r_0558	SBO:0000176	dimethylallyl-phosphate:FMNH2 prenyltransferase	dmp[c] + fmnh2[c] <=> prf2[c] + pi[c]	TRUE	AB395_RS29230	-1000	1000	Riboflavin Metabolism	2.5.1.129	R11225	[]	[]	RXN-16937	MNXR114523	37744	new reaction
559	r_0559	SBO:0000176		fmnh2[c] + o2[c] <=> dmbzid[c] + e4p[c] + h2o[c]	TRUE	AB395_RS08350	-1000	1000	Riboflavin Metabolism	1.13.11.79	R09083	rxn15951	[]	RXN-8771	MNXR122473	27346	new reaction
560	r_0560	SBO:0000176	pyridoxine:oxygen oxidoreductase (deaminating)	pydxn[c] + o2[c] <=> pydx[c] + h2o2[c]	TRUE	AB395_RS26815 or AB395_RS02675	-1000	1000	Vitamin B6 Metabolism	1.4.3.5	R01711	rxn01252	PDX3_3; PYDXNO	PYRIDOXINE-4-OXIDASE-RXN	MNXR103363	15036	new reaction
561	r_0561	SBO:0000176	pyridoxine 5'-phosphate synthase	3a2oprop[c] + dxyl5p[c] -> pdx5p[c] + pi[c] + 2 h2o[c]	FALSE	AB395_RS09885	0	1000	Vitamin B6 Metabolism	2.6.99.2	R05838	rxn04070	PDX5PS2	PDXJ-RXN	MNXR109875	15266	new reaction
562	r_0562	SBO:0000176	Deamino-NAD+ nucleotidohydrolase	dnad[c] + h2o[c] -> amp[c] + nicrnt[c]	FALSE	AB395_RS05910 or AB395_RS19410	0	1000	Nicotinate and Nicotinamide	3.6.1.9;3.6.1.22	R03004	rxn02154	[]	[]	[]	[]	new reaction
563	r_0563	SBO:0000176	NAD+ phosphohydrolase	nad[c] + h2o[c] -> amp[c] + nmn[c]	FALSE	AB395_RS05910 or AB395_RS19410	0	1000	Nicotinate and Nicotinamide	3.6.1.9;3.6.1.22	R00103	rxn00076	NADDP; NADDPe; NADDPp	NADPYROPHOSPHAT-RXN	MNXR101861	11801	new reaction
564	r_0564	SBO:0000176	deamido-NAD+:ammonia ligase (AMP-forming)	atp[c] + dnad[c] + nh3[c] + h[c] -> amp[c] + ppi[c] + nad[c]	FALSE	AB395_RS22445	0	1000	Nicotinate and Nicotinamide	6.3.1.5	R00189	rxn00138	NADS1; NADS1m; NADS1n; QNS1_1; QNS1_2	NAD-SYNTH-NH3-RXN	MNXR101897	21189	new reaction
565	r_0565	SBO:0000176	NADP+ 2'-phosphohydrolase	nadp[c] + h2o[c] -> pi[c] + nad[c] + h[c]	FALSE	AB395_RS08400 or AB395_RS12220 or AB395_RS15145 or AB395_RS18930 or AB395_RS27830	0	1000	Nicotinate and Nicotinamide	3.1.3.-	R00118	rxn00088	NADPPPS; NADPPPSm; U101; U105	RXN-5822	MNXR101798	28051	new reaction
566	r_0566	SBO:0000176	ATP:NAD+ 2'-phosphotransferase	atp[c] + nad[c] -> adp[c] + nadp[c]	FALSE	AB395_RS05200	0	1000	Nicotinate and Nicotinamide	2.7.1.23	R00104	rxn00077	NADK; NADKm; POS5_1; POS5_2; UTR1_1; UTR1_2; YEL041W_1; YEL041W_2	NAD-KIN-RXN	MNXR101882	18630	new reaction
567	r_0567	SBO:0000176	N-Ribosylnicotinamide:orthophosphate ribosyltransferase	rnam[c] + pi[c] <=> ncam[c] + r1p[c]	TRUE	AB395_RS18630	-1000	1000	Nicotinate and Nicotinamide	2.4.2.1	R02294	rxn01646	PNP; RIOR	RXN0-7092	MNXR103048	[]	new reaction
568	r_0568	SBO:0000176	nitric-oxide:ferricytochrome-c oxidoreductase	no2[c] + focytC[c] + h[c] -> no[c] + h2o[c] + ficytC[c]	FALSE	AB395_RS04540	0	1000	Nitrogen Metabolism	1.7.2.1	R00783	rxn00567	NIR	NITRITE-REDUCTASE-CYTOCHROME-RXN	MNXR140126	[]	new reaction
569	r_0570	SBO:0000176	pyruvate:pyruvate acetaldehydetransferase (decarboxylating); (S)-2-acetolactate pyruvate-lyase (carboxylating)	2 pyr[c] + h[c] -> alac__S[c] + co2[c]	FALSE	AB395_RS10030 and AB395_RS10035	0	1000	Pantothenate and CoA Biosynthesis	2.2.1.6	R00226	rxn15021	ACLS; ACLSm	ACETOLACTSYN-RXN	MNXR95271	20504	new reaction
570	r_0571	SBO:0000176	(R)-2,3-dihydroxy-3-methylbutanoate:NADP+ oxidoreductase (isomerizing)	alac__S[c] + nadph[c] + h[c] -> 23dhmb[c] + nadp[c]	FALSE	AB395_RS09805	0	1000	Pantothenate and CoA Biosynthesis	1.1.1.86	R04439	rxn15466	AHAI; KARA1; KARA1i; KARA1im	ACETOLACTREDUCTOISOM-RXN	MNXR97523	22071	new reaction
571	r_0572	SBO:0000176	Dephospho-CoA nucleotidohydrolase	dpcoa[c] + h2o[c] <=> pan4p[c] + amp[c]	TRUE	AB395_RS05910	-1000	1000	Pantothenate and CoA Biosynthesis	3.6.1.9	R03036	rxn02176	[]	[]	[]	[]	new reaction
572	r_0573	SBO:0000176	5,6-Dihydrouracil amidohydrolase	56dura[c] + h2o[c] -> cala[c]	FALSE	AB395_RS12295	0	1000	Pantothenate and CoA Biosynthesis	3.5.2.2	R02269	rxn01626	DHPM1; DIHYP	DIHYDROPYRIMIDINASE-RXN	MNXR97432	16124	new reaction
573	r_0574	SBO:0000176	L-aspartate 1-carboxy-lyase (beta-alanine-forming)	asp__L[c] + h2o[c] <=> ala_B[c] + co2[c] + h[c]	TRUE	AB395_RS25280	-1000	1000	Pantothenate and CoA Biosynthesis	4.1.1.11	R00489	rxn00346	ASP1DC; U98	ASPDECARBOX-RXN	MNXR96077	19498	new reaction
574	r_0575	SBO:0000176	dihydrofolate:NAD+ oxidoreductase	dhf[c] + nad[c] <=> fol[c] + nadh[c] + h[c]	TRUE	AB395_RS10090 or AB395_RS13870	-1000	1000	One carbon pool by folate	1.5.1.3	R02235	rxn01601	[]	[]	[]	[]	new reaction
575	r_0576	SBO:0000176	5,6,7,8-tetrahydrofolate:NADP+ oxidoreductase	thf[c] + 2 nadp[c] <=> fol[c] + 2 nadph[c] + 2 h[c]	TRUE	AB395_RS10090 or AB395_RS13870	-1000	1000	One carbon pool by folate	1.5.1.3	R00940	rxn12649	[]	[]	[]	[]	new reaction
576	r_0577	SBO:0000176	[protein]-S8-aminomethyldihydrolipoyllysine:tetrahydrofolate aminomethyltransferase (ammonia-forming)	s8ams[c] + thf[c] <=> dhlpyprot[c] + mlthf[c] + nh3[c]	TRUE	AB395_RS07680	-1000	1000	One carbon pool by folate	2.1.2.10	R04125	rxn06600	GCCb; GCCbim	GCVT-RXN	MNXR115909	16945	new reaction
577	r_0578	SBO:0000176	Formate:tetrahydrofolate ligase (ADP-forming)	thf[c] + for[c] + atp[c] <=> adp[c] + pi[c] + 10fthf[c]	TRUE	AB395_RS11645	-1000	1000	One carbon pool by folate	6.3.4.3	R00943	rxn00690	ADE3_2; FTHFL; FTHFLi; FTHFLm; FTHFLmi; MIS1_2	FORMATETHFLIG-RXN	MNXR115886	20224	new reaction
578	r_0579	SBO:0000176		gar[c] + methf[c] + h2o[c] <=> fgam[c] + thf[c] + 2 h[c]	TRUE	AB395_RS04205	-1000	1000	One carbon pool by folate	2.1.2.2	R04326	rxn03005	[]	[]	[]	[]	new reaction
579	r_0580	SBO:0000176	S-Aminomethyldihydrolipoylprotein:(6S)-tetrahydrofolate aminomethyltransferase (ammonia-forming)	methf[c] + h2o[c] <=> fa[c]	TRUE	AB395_RS07680	-1000	1000	One carbon pool by folate	2.1.2.10	R02300	rxn01652	FOMETR; THFATm	RXN-6321	MNXR121840	34768	new reaction
580	r_0581	SBO:0000176	5-Formyltetrahydrofolate cyclo-ligase (ADP-forming)	atp[c] + fa[c] -> adp[c] + pi[c] + methf[c] + e[c]	FALSE	AB395_RS15005	0	1000	One carbon pool by folate	6.3.3.2	R02301	rxn01653	FTHFCL; FTHFCLm	5-FORMYL-THF-CYCLO-LIGASE-RXN	MNXR115622	10489	new reaction
581	r_0582	SBO:0000176	NADH:ubiquinone oxidoreductase	q[c] + nadh[c] + 6 h[c] -> qh2[c] + nad[c] + 5 h[c]	FALSE	AB395_RS04905	0	1000	Oxidative Phosphorylation	7.1.1.2	R11945	[]	[]	[]	[]	[]	new reaction
582	r_0583	SBO:0000176	NADH:quinone oxidoreductase	nadh[c] + h[c] + qun[c] -> nad[c] + hqn[c]	FALSE	(AB395_RS04840 and AB395_RS04850 and AB395_RS04865 and AB395_RS04885 and AB395_RS04890 and AB395_RS04895 and AB395_RS04900 and AB395_RS04910 and AB395_RS04915 and AB395_RS10830 and AB395_RS10850 and AB395_RS10885 and AB395_RS10905) or AB395_RS09865	0	1000	Oxidative Phosphorylation	1.6.5.9 or 1.6.5.2	R07358	rxn07251	[]	[]	[]	[]	new reaction
583	r_0584	SBO:0000176	NADH:ubiquinone oxidoreductase	qh2[c] + nad[c] -> q[c] + nadh[c] + h[c]	FALSE	AB395_RS04840 and AB395_RS04850 and AB395_RS04865 and AB395_RS04885 and AB395_RS04890 and AB395_RS04895 and AB395_RS04900 and AB395_RS04910 and AB395_RS04915 and AB395_RS10830 and AB395_RS10850 and AB395_RS10885 and AB395_RS10905	0	1000	Oxidative Phosphorylation	1.6.5.9	R02163	rxn06108	NADH2r	NADH-DEHYDROG-A-RXN	MNXR116078	29094	new reaction
584	r_0586	SBO:0000176		hqn[c] + 2 ficytC[c] -> qun[c] + 2 focytC[c] + 2 h[c]	FALSE	AB395_RS08240 and AB395_RS14845	0	1000	Oxidative Phosphorylation	7.1.1.8	[]	[]	[]	[]	[]	[]	new reaction
585	r_0587	SBO:0000176	ferrocytochrome-c:oxygen oxidoreductase	o2[c] + 4 focytC[c] + 4 h[c] -> 4 ficytC[c] + 2 h2o[c]	FALSE	AB395_RS02720 and AB395_RS02725 and AB395_RS08875 and AB395_RS08885 and AB395_RS08890 and AB395_RS12630 and AB395_RS12755 and AB395_RS12765 and AB395_RS12770	0	1000	Oxidative Phosphorylation	7.1.1.9	R00081	rxn00058	[]	CYTOCHROME-C-OXIDASE-RXN	[]	11437	new reaction
586	r_0588	SBO:0000185	ATP phosphohydrolase (two-sector, H+-transporting)	atp[c] + h2o[c] + 4 h[c] -> adp[c] + pi[c] + 5 h[e]	FALSE	AB395_RS02355 and AB395_RS02360 and AB395_RS02365 and AB395_RS16750 and AB395_RS16760 and AB395_RS16765 and AB395_RS16770 and AB395_RS16775	0	1000	Oxidative Phosphorylation	7.1.2.2	[]	[]	[]	[]	[]	[]	new reaction
587	r_0589	SBO:0000176	(2R,3S)-3-methylmalate:NAD+ oxidoreductase	r3mmal[c] + nad[c] -> 2obut[c] + co2[c] + nadh[c]	FALSE	AB395_RS17775	0	1000	Valine, Leucine and Isoleucine Biosynthesis	1.1.1.85	R00994	rxn00735	[]	RXN-7745	MNXR106779	32718	new reaction
588	r_0590	SBO:0000176	pyruvate:2-oxobutanoate acetaldehydetransferase (decarboxylating)	pyr[c] + 2obut[c] + h[c] -> 2ahbut[c] + co2[c]	FALSE	AB395_RS10030 and AB395_RS10035	0	1000	Valine, Leucine and Isoleucine Biosynthesis	2.2.1.6	R08648	rxn08043	ACHBS; ACHBSm	ACETOOHBUTSYN-RXN	MNXR95260	27655	new reaction
589	r_0591	SBO:0000176	(S)-2-Aceto-2-hydroxybutanoate:NADP+ oxidoreductase (isomerizing)	2ahbut[c] <=> 3hmop[c]	TRUE	AB395_RS09805	-1000	1000	Valine, Leucine and Isoleucine Biosynthesis	1.1.1.86	R05069	rxn03436	[]	RXN-14106	MNXR100903	25407	new reaction
590	r_0592	SBO:0000176	(R)-2,3-Dihydroxy-3-methylpentanoate:NADP+ oxidoreductase (isomerizing)	23dhmp[c] + nadp[c] <=> 3hmop[c] + nadph[c] + h[c]	TRUE	AB395_RS09805	-1000	1000	Valine, Leucine and Isoleucine Biosynthesis	1.1.1.86	R05068	rxn03435	[]	[]	[]	[]	new reaction
591	r_0593	SBO:0000176		accoa[c] + pyr[c] + h2o[c] -> 2mm__R[c] + coa[c]	FALSE	AB395_RS03860	0	1000	Valine, Leucine and Isoleucine Biosynthesis	2.3.3.21	R07399	rxn05109	[]	RXN-7743	MNXR111048	19046	new reaction
592	r_0594	SBO:0000176	(S)-2-Acetolactate methylmutase	alac__S[c] <=> 3hmoa[c]	TRUE	AB395_RS09805	-1000	1000	Valine, Leucine and Isoleucine Biosynthesis	1.1.1.86	R05071	rxn15511	[]	2-ACETOLACTATE-MUTASE-RXN	MNXR100906	16364	new reaction
593	r_0595	SBO:0000176	(R)-2,3-Dihydroxy-3-methylbutanoate:NADP+ oxidoreductase (isomerizing)	23dhmb[c] + nadp[c] <=> 3hmoa[c] + nadph[c] + h[c]	TRUE	AB395_RS09805	-1000	1000	Valine, Leucine and Isoleucine Biosynthesis	1.1.1.86	R04440	rxn03068	[]	[]	[]	[]	new reaction
594	r_0596	SBO:0000176	L-aspartate-4-semialdehyde hydro-lyase [adding pyruvate and cyclizing; (2S,4S)-4-hydroxy-2,3,4,5-tetrahydrodipicolinate-forming]	aspsa[c] + pyr[c] <=> 4hthdp[c] + h2o[c] + h[c]	TRUE	AB395_RS03625 or AB395_RS05950 or AB395_RS16130 or AB395_RS20570 or AB395_RS21045 or AB395_RS23690	-1000	1000	Lysine Biosynthesis	4.3.3.7	R10147	rxn40037	[]	DIHYDRODIPICSYN-RXN	MNXR113514	[]	new reaction
595	r_0597	SBO:0000176		n6all26d[c] + akg[c] <=> nal2a6o[c] + glu__L[c]	TRUE	AB395_RS11175 or AB395_RS13070 or AB395_RS17670 or AB395_RS29430	-1000	1000	Lysine Biosynthesis	2.6.1.-	R04467	rxn03086	APTA1i	RXN-4822	MNXR95434	25315	new reaction
596	r_0598	SBO:0000176	LL-2,6-diaminoheptanedioate:2-oxoglutarate aminotransferase	26dap_LL[c] + akg[c] <=> thdp[c] + glu__L[c] + h2o[c] + h[c]	TRUE	AB395_RS06490	-1000	1000	Lysine Biosynthesis	2.6.1.83	R07613	rxn07441	[]	RXN-7737	MNXR97144	23991	new reaction
597	r_0599	SBO:0000176	L-Histidinol:NAD+ oxidoreductase	histd[c] + nad[c] -> histda[c] + nadh[c] + h[c]	FALSE	AB395_RS01195 or AB395_RS06405	0	1000	Histidine Metabolism	1.1.1.23	R03012	rxn02159	[]	HISTOLDEHYD-RXN	MNXR107887	33799	new reaction
598	r_0600	SBO:0000176	amet[c]:L-histidine N-methyltransferase	his__L[c] + amet[c] -> Npmehis[c] + ahcys[c]	FALSE	AB395_RS00130 or AB395_RS02585 or AB395_RS03690 or AB395_RS06030 or AB395_RS07370 or AB395_RS09335 or AB395_RS12050 or AB395_RS13585 or AB395_RS14070 or AB395_RS17840 or AB395_RS19415 or AB395_RS19970 or AB395_RS30580 or AB395_RS22470 or AB395_RS24820 or AB395_RS27325 or AB395_RS28460	0	1000	Histidine Metabolism	2.1.1.-	R01159	rxn00860	ARMT; HMT1	[]	[]	[]	new reaction
599	r_0601	SBO:0000176	L-histidinal:NAD+ oxidoreductase	histda[c] + h2o[c] + nad[c] -> his__L[c] + nadh[c] + 2 h[c]	FALSE	AB395_RS01195 or AB395_RS06405	0	1000	Histidine Metabolism	1.1.1.23	R01163	rxn00863	[]	HISTALDEHYD-RXN	MNXR106847	33804	new reaction
600	r_0602	SBO:0000176	S-adenosyl-L-methionine:L-histidine Nalpha-methyltransferase	his__L[c] + 3 amet[c] + h[c] -> hercyn[c] + 3 ahcys[c]	FALSE	AB395_RS35035	0	1000	Histidine Metabolism	2.1.1.44	R01169	rxn14097	[]	RXN-14431	MNXR106850	38472	new reaction
601	r_0603	SBO:0000176	4-imidazolone-5-propanoate:oxygen oxidoreductase	4izp[c] + o2[c] + h2o[c] -> h5p[c] + h2o2[c]	FALSE	AB395_RS02555 and AB395_RS12975 and AB395_RS30770 and AB395_RS20405	0	1000	Histidine Metabolism	1.14.13.-	R00069	rxn14394	[]	IMIDHYD-RXN	MNXR106371	[]	new reaction
602	r_0604	SBO:0000176	N-Formimino-L-glutamate iminohydrolase	nflgln[c] + h2o[c] -> Nforglu[c] + nh3[c]	FALSE	AB395_RS14225	0	1000	Histidine Metabolism	3.5.3.13	R02286	rxn01640	FORGLUIH; FORMD	FORMIMINOGLUTAMATE-DEIMINASE-RXN	MNXR99617	22833	new reaction
603	r_0605	SBO:0000176	N-Formyl-L-glutamate amidohydrolase	Nforglu[c] + h2o[c] <=> for[c] + glu__L[c] + h[c]	TRUE	AB395_RS24910	-1000	1000	Histidine Metabolism	3.5.1.68	R00525	rxn00375	NFORGLUAH	N-FORMYLGLUTAMATE-DEFORMYLASE-RXN	MNXR101945	12477	new reaction
604	r_0606	SBO:0000176	5-oxo-L-proline amidohydrolase (ATP-hydrolysing)	atp[c] + 5oxpro[c] + 2 h2o[c] -> adp[c] + pi[c] + glu__L[c]	FALSE	AB395_RS13175 and AB395_RS29415 and AB395_RS29425	0	1000	Glutathione Metabolism	3.5.2.9	R00251	rxn00186	OPAH	5-OXOPROLINASE-ATP-HYDROLYSING-RXN	MNXR138674	10349	new reaction
605	r_0607	SBO:0000176	Isocitrate:NADP+ oxidoreductase (decarboxylating)	icit[c] + nadp[c] -> akg[c] + co2[c] + nadph[c]	FALSE	AB395_RS08090	0	1000	Glutathione Metabolism	1.1.1.42	R00267	rxn00198	ICDHy; ICDHym; ICDHyp; ICDHyr	ISOCITDEH-RXN	MNXR115983	19632	new reaction
606	r_0608	SBO:0000176	(S)-3-Hydroxybutanoyl-CoA:NADP+ oxidoreductase	3hbcoa[c] + nadp[c] <=> aacoa[c] + nadph[c] + h[c]	TRUE	AB395_RS13980	-1000	1000	Butanoate metabolism	1.1.1.157	R01976	rxn01452	[]	3-HYDROXYBUTYRYL-COA-DEHYDROGENASE-RXN	MNXR100565	16199	new reaction
607	r_0609	SBO:0000176	propan-2-ol:NAD+ oxidoreductase	2ppoh[c] + nad[c] <=> acetone[c] + nadh[c] + h[c]	TRUE	AB395_RS00480 or AB395_RS08760 or AB395_RS09800 or AB395_RS12225 or AB395_RS18840 or AB395_RS21780 or AB395_RS23700	-1000	1000	Butanoate metabolism	1.1.1.-	R10703	rxn40442	[]	RXN-17571	MNXR114023	[]	new reaction
608	r_0610	SBO:0000176	(E)-4-hydroxy-3-methylbut-2-en-1-yl-diphosphate:oxidized ferredoxin oxidoreductase (hydrating)	2mecdp[c] + 2 fdxrd[c] + 2 h[c] -> h2mb4p[c] + h2o[c] + 2 fdxox[c]	FALSE	AB395_RS17575	0	1000	Terpenoid Backbone Biosynthesis	1.17.7.1	R08689	rxn14070	[]	RXN0-882	MNXR112205	26121	new reaction
609	r_0611	SBO:0000176	isopentenyl-diphosphate Delta3-Delta2-isomerase	ipdp[c] <=> dmpp[c]	TRUE	AB395_RS30660	-1000	1000	Terpenoid Backbone Biosynthesis	5.3.3.2	R01123	rxn00830	IDI1; IPDDI; IPDDIi	IPPISOM-RXN	MNXR100796	23287	new reaction
610	r_0612	SBO:0000176	3'-phospho-5'-adenylyl sulfate 3'-phosphohydrolase	paps[c] + h2o[c] <=> aps[c] + pi[c]	TRUE	AB395_RS02220 or AB395_RS12470 or AB395_RS26135 or AB395_RS32410 or AB395_RS32780	-1000	1000	Sulfur Metabolism	3.1.3.7	R00508	rxn00360	[]	R163-RXN	MNXR96322	[]	new reaction
611	r_0613	SBO:0000176	adenosine 3',5'-bisphosphate,sulfite:oxidized-thioredoxin oxidoreductase (3'-phosphoadenosine-5'-phosphosulfate -forming)	trdrd[c] + paps[c] + h[c] -> trdox[c] + so3[c] + pap[c]	FALSE	AB395_RS03005	0	1000	Sulfur Metabolism	1.8.4.8	R02021	rxn05239	PAPR; PAPSR; PASR	1.8.4.8-RXN	MNXR102376	11727	new reaction
612	r_0614	SBO:0000176	Hydrogen-sulfide:ferredoxin oxidoreductase	h2s[c] + 6 fdxox[c] + 3 h2o[c] <=> so3[c] + 6 fdxrd[c] + 7 h[c]	TRUE	AB395_RS05930	-1000	1000	Sulfur Metabolism	1.8.7.1	R00859	rxn05902	[]	SULFITE-REDUCTASE-FERREDOXIN-RXN	MNXR104653	23134	new reaction
613	r_0615	SBO:0000176	L-serine:tRNASec ligase (AMP-forming)	atp[c] + ser__L[c] + trnasecys[c] <=> amp[c] + ppi[c] + sertrna_sec[c]	TRUE	AB395_RS06245	-1000	1000	Aminoacyl-tRNA biosynthesis	6.1.1.11	R08218	rxn11747	[]	RXN0-2161	MNXR123138	42581	new reaction
614	r_0616	SBO:0000176	L-lysine:tRNALys ligase (AMP-forming)	atp[c] + lys__L[c] + trnalys[c] + h[c] <=> amp[c] + ppi[c] + lystrna[c]	TRUE	AB395_RS15845	-1000	1000	Aminoacyl-tRNA biosynthesis	6.1.1.6	R03658	rxn06442	KRS1; MSK1	LYSINE--TRNA-LIGASE-RXN	MNXR116033	20793	new reaction
615	r_0617	SBO:0000176	acetyl-CoA:malonyl-[acyl-carrier protein] C-acetyltransferase (decarboxylating)	accoa[c] + malACP[c] + h[c] -> actACP[c] + coa[c] + co2[c]	FALSE	AB395_RS04410	0	1000	Fatty Acid Biosynthesis	2.3.1.180	R10707	rxn08766	KAS15	2.3.1.180-RXN	MNXR100913	12083	new reaction
616	r_0618	SBO:0000176	acyl-[acyl-carrier-protein]:malonyl-[acyl-carrier-protein] C-acyltransferase (decarboxylating)	acacp[c] + malACP[c] -> 3oocyACP[c] + co2[c] + ACP[c]	FALSE	AB395_RS19520 or AB395_RS28670	0	1000	Fatty Acid Biosynthesis	2.3.1.41; 2.3.1.179	R02768	rxn06238	[]	2.3.1.41-RXN	MNXR107714	[]	new reaction
617	r_0619	SBO:0000176	(3R)-3-hydroxyacyl-[acyl-carrier-protein]:NADP+ oxidoreductase	3haACP[c] + nadp[c] <=> 3oocyACP[c] + nadph[c] + h[c]	TRUE	AB395_RS03985	-1000	1000	Fatty Acid Biosynthesis	1.1.1.100	R02767	rxn06237	[]	3-OXOACYL-ACP-REDUCT-RXN	MNXR107713	17399	new reaction
618	r_0620	SBO:0000176	(3R)-3-hydroxyacyl-[acyl-carrier protein] hydro-lyase (trans-2-enoyl-[acyl-carrier protein]-forming)	3haACP[c] <=> t23dACP[c] + h2o[c]	TRUE	AB395_RS06100 and AB395_RS19525	-1000	1000	Fatty Acid Biosynthesis	4.2.1.59	R10208	rxn17757	[]	3-HYDROXYDECANOYL-ACP-DEHYDR-RXN	MNXR113571	13098	new reaction
619	r_0621	SBO:0000176	acyl-[acyl-carrier-protein]:NAD+ oxidoreductase	acacp[c] + nad[c] <=> t23dACP[c] + nadh[c] + h[c]	TRUE	AB395_RS19515	-1000	1000	Fatty Acid Biosynthesis	1.3.1.9	R01403	rxn05994	[]	ENOYL-ACP-REDUCT-NADH-RXN	[]	[]	new reaction
620	r_0622	SBO:0000176	(S)-dihydroorotate:quinone oxidoreductase	dhor__S[c] + qun[c] <=> orot[c] + hqn[c]	TRUE	AB395_RS00845	-1000	1000	Pyrimidine Metabolism	1.3.5.2	R01868	rxn14299	[]	DIHYDROOROTATE-DEHYDROGENASE-RXN	MNXR115842	18074	new reaction
621	r_0623	SBO:0000176	uridine triphosphate pyrophosphohydrolase	utp[c] + h2o[c] -> ump[c] + ppi[c]	FALSE	AB395_RS05910 or AB395_RS16785 or AB395_RS17110 or AB395_RS21070	0	1000	Pyrimidine Metabolism	3.6.1.9 or 3.6.1.-	R00662	rxn00463	NTPP8	RXN-14139	MNXR102055	29398	new reaction
622	r_0624	SBO:0000176	UTP:ammonia ligase (ADP-forming)	atp[c] + utp[c] + nh3[c] -> adp[c] + pi[c] + ctp[c] + h[c]	FALSE	AB395_RS05780	0	1000	Pyrimidine Metabolism	6.3.4.2	R00571	rxn00410	CTPS1; URA7_2; URA8_2	RXN-14325	MNXR96944	16598	new reaction
623	r_0625	SBO:0000176	CTP diphosphohydrolase (diphosphate-forming); CTP pyrophosphohydrolase	ctp[c] + h2o[c] -> cmp[c] + ppi[c]	FALSE	AB395_RS05910	0	1000	Pyrimidine Metabolism	3.6.1.9	R00515	rxn00367	NTPP4	RXN0-383	MNXR102053	27763	new reaction
624	r_0626	SBO:0000176	ATP:dUMP phosphotransferase	atp[c] + dump[c] -> adp[c] + dudp[c]	FALSE	AB395_RS07955	0	1000	Pyrimidine Metabolism	2.7.4.9	R02098	rxn01517	URA6_3; URIDK2; URIDK2r; URIDK2rn; URIDK3	RXN-14122	MNXR105160	30658	new reaction
625	r_0627	SBO:0000176	2'-deoxyuridine 5'-diphosphate:oxidized-thioredoxin 2'-oxidoreductase	trdrd[c] + udp[c] -> dudp[c] + trdox[c] + h2o[c]	FALSE	AB395_RS07730 or AB395_RS29155 or AB395_RS29160	0	1000	Pyrimidine Metabolism	1.17.4.1	R02018	rxn06075	RNDR4; RNDR4n; RNDR5B12	UDPREDUCT-RXN	MNXR104066	28028	new reaction
626	r_0628	SBO:0000176	cytidine 3'-phosphate phosphohydrolase	3cmp[c] + h2o[c] -> cytd[c] + pi[c]	FALSE	AB395_RS06250	0	1000	Pyrimidine Metabolism	3.1.3.6	R02370	rxn01704	3NTD4pp; 3NUCLE3	RXN-14090	MNXR94934	27897	new reaction
627	r_0629	SBO:0000176	2'-deoxyuridine 5'-monophosphate phosphohydrolase	dump[c] + h2o[c] -> duri[c] + pi[c] + h[c]	FALSE	AB395_RS08400 or AB395_RS12220 or AB395_RS15145 or AB395_RS18930 or AB395_RS27830	0	1000	Pyrimidine Metabolism	3.1.3.-	R02102	rxn01521	NTD1; NTD1pp; U24	RXN-14143	MNXR102028	29358	new reaction
628	r_0630	SBO:0000176	uridine 3'-monophosphate phosphohydrolase	3ump[c] + h2o[c] -> uri[c] + pi[c]	FALSE	AB395_RS06250	0	1000	Pyrimidine Metabolism	3.1.3.6	R01877	rxn01367	3NTD2pp; 3NUCLE2	RXN-14115	MNXR94932	27891	new reaction
629	r_0631	SBO:0000176	thymidine:phosphate deoxy-alpha-D-ribosyltransferase	thymd[c] + pi[c] <=> thym[c] + 2dr1p[c]	TRUE	AB395_RS18635	-1000	1000	Pyrimidine Metabolism	2.4.2.4	R01570	rxn01146	PNP1_2; TMDPP	THYM-PHOSPH-RXN	MNXR104887	16040	new reaction
630	r_0632	SBO:0000176	(R)-5,6-dihydrothymine:NAD+ oxidoreductase	56dthm[c] + nad[c] <=> thym[c] + nadh[c] + h[c]	TRUE	AB395_RS12265	-1000	1000	Pyrimidine Metabolism	1.3.1.1	R11026	[]	[]	[]	[]	[]	new reaction
631	r_0633	SBO:0000176	dTTP diphosphohydrolase	dttp[c] + h2o[c] -> dtmp[c] + ppi[c]	FALSE	AB395_RS05910 or AB395_RS16785 or AB395_RS17110 or AB395_RS21070	0	1000	Pyrimidine Metabolism	3.6.1.9; 3.6.1.-	R11323	[]	[]	RXN0-5107	MNXR97809	28535	new reaction
632	r_0634	SBO:0000176	L-Aspartic acid:oxygen oxidoreductase (deaminating)	asp__L[c] + h2o[c] + o2[c] -> oaa[c] + nh3[c] + h2o2[c] + h[c]	FALSE	AB395_RS03775	0	1000	Alanine, Aspartate and Glutamate metabolism	1.4.3.16	R00357	rxn00262	ASPO1; ASPO7	[]	[]	[]	new reaction
633	r_0635	SBO:0000176	choline:acceptor 1-oxidoreductase	chol[c] + acptr[c] <=> betald[c] + racptr[c]	TRUE	AB395_RS03020	-1000	1000	Glycine, Serine, and Threonine Metabolism	1.1.99.1	R01025	rxn05921	[]	CHD-RXN	MNXR115763	17436	new reaction
634	r_0636	SBO:0000176	p-cumic alcohol:NAD+ oxidoreductase	betald[c] + nad[c] + h2o[c] <=> glyb[c] + nadh[c] + 2 h[c]	TRUE	AB395_RS03025	-1000	1000	Glycine, Serine, and Threonine Metabolism	1.2.1.8	R02565	rxn01867	BADH; BETALDHx	BADH-RXN	MNXR96237	30070	new reaction
635	r_0637	SBO:0000176	p-Cumic alcohol:NADP+ oxidoreductase	betald[c] + nadp[c] + h2o[c] <=> glyb[c] + nadph[c] + 2 h[c]	TRUE	AB395_RS03025	-1000	1000	Glycine, Serine, and Threonine Metabolism	1.2.1.8	R02566	rxn01868	BETALDHy	[]	[]	[]	new reaction
636	r_0638	SBO:0000176	Trimethylaminoacetate:L-homosysteine S-methyltransferase	glyb[c] + hcys__L[c] -> dmgly[c] + met__L[c]	FALSE	AB395_RS09055	0	1000	Glycine, Serine, and Threonine Metabolism	2.1.1.5	R02821	rxn02028	BHMT; GLYBTM	2.1.1.5-RXN	MNXR96250	22337	new reaction
637	r_0639	SBO:0000176	glycine:lipoylprotein oxidoreductase (decarboxylating and acceptor-aminomethylating)	gly[c] + lprot[c] -> s8ams[c] + co2[c]	FALSE	AB395_RS07670	0	1000	Glycine, Serine, and Threonine Metabolism	1.4.4.2	R03425	rxn06377	GCCa; GCCam	GCVP-RXN	MNXR115908	24307	new reaction
638	r_0640	SBO:0000176	succinyl-CoA:glycine C-succinyltransferase (decarboxylating)	succoa[c] + gly[c] + h[c] -> 5aop[c] + coa[c] + co2[c]	FALSE	AB395_RS16525 or AB395_RS22300	0	1000	Glycine, Serine, and Threonine Metabolism	2.3.1.37	R00830	rxn00599	ALASm; HEM1	5-AMINOLEVULINIC-ACID-SYNTHASE-RXN	MNXR95695	12922	new reaction
639	r_0641	SBO:0000176	N2-acetyl-L-2,4-diaminobutanoate amidohydrolase	aac24dab[c] + h2o[c] -> 24dab[c] + ac[c]	FALSE	AB395_RS20545	0	1000	Glycine, Serine, and Threonine Metabolism	3.5.1.125	R09801	rxn16642	[]	[]	[]	[]	new reaction
640	r_0642	SBO:0000176	ectoine aminohydrolase	ecto__L[c] + h2o[c] -> aac24dab[c]	FALSE	AB395_RS20540	0	1000	Glycine, Serine, and Threonine Metabolism	3.5.4.44	R09800	rxn16641	[]	[]	[]	[]	new reaction
641	r_0643	SBO:0000176	O-phospho-L-serine:hydrogen-sulfide 2-amino-2-carboxyethyltransferase	pser__L[c] + h2s[c] -> cys__L[c] + pi[c] + h[c]	FALSE	AB395_RS07115 or AB395_RS20085	0	1000	Cysteine and Methionine Metabolism	2.5.1.47	R07274	rxn05035	[]	2.5.1.65-RXN	MNXR110957	10252	new reaction
642	r_0644	SBO:0000176	L-cysteate:2-oxoglutarate aminotransferase	Lcyst[c] + akg[c] <=> 3spyr[c] + glu__L[c]	TRUE	AB395_RS18540	-1000	1000	Cysteine and Methionine Metabolism	2.6.1.1	R02433	rxn01757	[]	RXN-11737	MNXR95161	[]	new reaction
643	r_0645	SBO:0000176	L-cysteine:2-oxoglutarate aminotransferase	cys__L[c] + akg[c] <=> mercppyr[c] + glu[c]	TRUE	AB395_RS18540	-1000	1000	Cysteine and Methionine Metabolism	2.6.1.1	R00896	rxn00647	ASPTA4; R00896	[]	[]	[]	new reaction
644	r_0646	SBO:0000176	L-cysteine hydrogen-sulfide-lyase (deaminating; pyruvate-forming)	cys__L[c] + h2o[c] <=> h2s[c] + pyr[c] + nh3[c] + h[c]	TRUE	AB395_RS05975	-1000	1000	Cysteine and Methionine Metabolism	4.4.1.13	R00782	rxn00566	CYSDS; TRPAS1	LCYSDESULF-RXN	MNXR96994	24932	new reaction
645	r_0647	SBO:0000176	3-mercaptopyruvate:sulfide sulfurtransferase	mercppyr[c] + trdrd[c] <=> h2s[c] + pyr[c] + trdox[c]	TRUE	AB395_RS07105	-1000	1000	Cysteine and Methionine Metabolism	2.8.1.2	R03105	rxn02229	[]	[]	[]	[]	new reaction
646	r_0648	SBO:0000176	2-aminobutanoate:2-oxoglutarate aminotransferase	C02356[c] + akg[c] <=> 2obut[c] + glu__L[c]	TRUE	AB395_RS19375 and AB395_RS03155	-1000	1000	Cysteine and Methionine Metabolism	2.6.1.42	R10991	[]	[]	[]	[]	[]	new reaction
647	r_0649	SBO:0000176	L-glutamate:2-aminobutanoate gamma-ligase (ADP-forming)	atp[c] + glu__L[c] + C02356[c] <=> adp[c] + pi[c] + CE1661[c]	TRUE	AB395_RS02025	-1000	1000	Cysteine and Methionine Metabolism	6.3.2.2	R10993	[]	[]	[]	[]	[]	new reaction
648	r_0650	SBO:0000176	gamma-L-glutamyl-L-2-aminobutyrate:glycine ligase (ADP-forming)	atp[c] + CE1661[c] + gly[c] <=> adp[c] + pi[c] + opmt[c]	TRUE	AB395_RS20075	-1000	1000	Cysteine and Methionine Metabolism	6.3.2.3	R10994	[]	[]	[]	[]	[]	new reaction
649	r_0651	SBO:0000176	L-Homoserine:NAD+ oxidoreductase	hom__L[c] + nad[c] <=> aspsa[c] + nadh[c] + h[c]	TRUE	AB395_RS06495	-1000	1000	Cysteine and Methionine Metabolism	1.1.1.3	R01773	rxn01301	HOM6_1; HSDx; HSDxi	[]	[]	[]	new reaction
650	r_0653	SBO:0000176	acyl-[acyl-carrier protein]:S-adenosyl-L-methionine acyltranserase (lactone-forming, methylthioadenosine-releasing)	acacp[c] + amet[c] <=> ACP[c] + 5mta[c] + nalhsrln[c]	TRUE	AB395_RS31975	-1000	1000	Cysteine and Methionine Metabolism	2.3.1.184	R08940	rxn14374	[]	[]	[]	[]	new reaction
651	r_0654	SBO:0000176	methylthioadenosine methylthioribohydrolase	5mta[c] + h2o[c] <=> ade[c] + 5mtr[c]	TRUE	AB395_RS19930	-1000	1000	Cysteine and Methionine Metabolism	3.2.2.9; 3.2.2.16	R01401	rxn01021	MTAN	METHYLTHIOADENOSINE-NUCLEOSIDASE-RXN	MNXR101744	13618	new reaction
652	r_0655	SBO:0000176	O-acetyl-L-homoserine:methanethiol 3-amino-3-carboxypropyltransferase; O-Acetyl-L-homoserine acetate-lyase (adding methanethiol)	achms[c] + ch4s[c] <=> met__L[c] + ac[c]	TRUE	AB395_RS04720	-1000	1000	Cysteine and Methionine Metabolism	2.5.1.49	R00651	rxn00453	AHSERL; MET17_1	O-ACETYLHOMOSERINE-THIOL-LYASE-RXN	MNXR95634	10049	new reaction
653	r_0656	SBO:0000176		4met2obut[c] + glu__L[c] -> met__L[c] + akg[c]	FALSE	AB395_RS19905	0	1000	Cysteine and Methionine Metabolism	2.6.1.5	R07396	rxn05108	TYRTA2; UNK3	RXN-14147	MNXR95923	25798	new reaction
654	r_0657	SBO:0000176	L-methionine:indole-3-pyruvic acid aminotransferase	met__L[c] + indpyr[c] -> 4met2obut[c] + trp__L[c]	FALSE	AB395_RS11175 or AB395_RS13070 or AB395_RS17670 or AB395_RS29430	0	1000	Cysteine and Methionine Metabolism	2.6.1.-	R12055	[]	[]	[]	[]	[]	new reaction
655	r_0658	SBO:0000176	acetyl-CoA:propanoyl-CoA 2-C-acetyltransferase; 2-methylacetoacetyl-CoA thiolase	ppcoa[c] + accoa[c] -> coa[c] + 2maacoa[c]	FALSE	AB395_RS16005	0	1000	Valine, leucine and isoleucine degradation	2.3.1.16	R00927	rxn00676	ACACT10rr; ACOACAT; MACCOAT	METHYLACETOACETYLCOATHIOL-RXN	MNXR95195	30721	new reaction
656	r_0659	SBO:0000176	(R)-Methylmalonyl-CoA CoA-carbonylmutase	mmcoa__R[c] <=> succoa[c]	TRUE	AB395_RS21695	-1000	1000	Valine, leucine and isoleucine degradation	5.4.99.2	R00833	rxn00602	MMM; MMM2	METHYLMALONYL-COA-MUT-RXN	MNXR101661	22891	new reaction
657	r_0660	SBO:0000176	Methylmalonyl-CoA epimerase	mmcoa__R[c] <=> mmcoa__S[c]	TRUE	AB395_RS04930	-1000	1000	Valine, leucine and isoleucine degradation	5.1.99.1	R02765	rxn01996	MME	METHYLMALONYL-COA-EPIM-RXN	MNXR101657	20556	new reaction
658	r_0661	SBO:0000176	GTP 8,9-hydrolase	gtp[c] + h2o[c] -> HC01651[c]	FALSE	AB395_RS05675	0	1000	Folate Biosynthesis	3.5.4.16	R00428	rxn00302	[]	[]	[]	[]	new reaction
659	r_0662	SBO:0000176	formamidopyrimidine nucleoside triphosphate amidohydrolase	HC01651[c] + h2o[c] -> HC01652[c] + for[c]	FALSE	AB395_RS05675	0	1000	Folate Biosynthesis	3.5.4.16	R05046	rxn03419	[]	[]	[]	[]	new reaction
660	r_0663	SBO:0000176	2,5-diaminopyrimidine nucleoside triphosphate mutase	HC01652[c] -> HC01710[c]	FALSE	AB395_RS05675	0	1000	Folate Biosynthesis	3.5.4.16	R05048	rxn03421	[]	[]	[]	[]	new reaction
661	r_0665	SBO:0000176	7,8-dihydroneopterin 3'-triphosphate acetaldehyde-lyase (6-carboxy-5,6,7,8-tetrahydropterin and triphosphate-forming)	ahdt[c] + h2o[c] -> cph4[c] + acald[c] + pppi[c]	FALSE	AB395_RS23155	0	1000	Folate Biosynthesis	4.1.2.50	R09959	rxn16806	[]	RXN0-5507	MNXR95095	27967	new reaction
662	r_0666	SBO:0000176	6-carboxy-5,6,7,8-tetrahydropterin ammonia-lyase	cph4[c] -> cdg[c] + nh3[c]	FALSE	AB395_RS23160	0	1000	Folate Biosynthesis	4.3.99.3	R10002	rxn39964	[]	RXN0-6575	MNXR96522	27975	new reaction
663	r_0667	SBO:0000176	7-carboxy-7-carbaguanine:ammonia ligase (ADP-forming)	cdg[c] + nh3[c] + atp[c] -> preq0[c] + adp[c] + pi[c] + h2o[c]	FALSE	AB395_RS23150	0	1000	Folate Biosynthesis	6.3.4.20	R09978	rxn16824	[]	RXN-12093	MNXR96492	27983	new reaction
664	r_0668	SBO:0000176	7-aminomethyl-7-carbaguanine:NADP+ oxidoreductase	preq0[c] + 2 nadph[c] + 2 h[c] -> preq1[c] + 2 nadp[c]	FALSE	AB395_RS11610	0	1000	Folate Biosynthesis	1.7.1.13	R07605	rxn07436	[]	RXN0-4022	MNXR96521	13411	new reaction
665	r_0669	SBO:0000176	GTP 3',8-cyclase [(8S)-3',8-cyclo-7,8-dihydroguanosine 5'-triphosphate-forming]	gtp[c] + amet[c] + racptr[c] -> 38ch2gtp[c] + dad_5[c] + met__L[c] + acptr[c]	FALSE	AB395_RS08440	0	1000	Folate Biosynthesis	4.1.99.22	R09394	rxn16231	[]	RXN-8340	MNXR122271	26378	new reaction
666	r_0670	SBO:0000176	(8S)-3',8-cyclo-7,8-dihydroguanosine 5'-triphosphate lyase (cyclic pyranopterin phosphate-forming)	38ch2gtp[c] + h2o[c] -> cpmp[c] + ppi[c]	FALSE	AB395_RS06920	0	1000	Folate Biosynthesis	4.6.1.17	R11372	[]	[]	[]	[]	[]	new reaction
667	r_0671	SBO:0000176		dhnpt[c] + pi[c] -> dhppt[c] + h2o[c]	FALSE	AB395_RS16785 or AB395_RS17110 or AB395_RS21070	0	1000	Folate Biosynthesis	3.6.1.-	R04621	rxn03168	[]	DIHYDRONEOPTERIN-MONO-P-DEPHOS-RXN	MNXR126238	25306	new reaction
668	r_0672	SBO:0000176	6-(hydroxymethyl)-7,8-dihydropterin:4-aminobenzoate 2-amino-4-hydroxydihydropteridine-6-methenyltransferase	6hmhpt[c] + 4abz[c] -> dhpt[c] + h2o[c]	FALSE	AB395_RS08180	0	1000	Folate Biosynthesis	2.5.1.15	R03066	rxn02200	DHPS; DHPSm	RXN-14226	MNXR140386	30890	new reaction
669	r_0673	SBO:0000176	dihydrofolate:NADP+ oxidoreductase	dhf[c] + nadp[c] <=> fol[c] + nadph[c] + h[c]	TRUE	AB395_RS09230 or AB395_RS13680 or AB395_RS10090 or AB395_RS13870 or AB395_RS01230	-1000	1000	Folate Biosynthesis	1.5.1.3	R02236	rxn01602	DHFOR2; FOLR2	[]	[]	[]	new reaction
670	r_0674	SBO:0000176	5,6,7,8-tetrahydrofolate:NAD+ oxidoreductase	thf[c] + 2 nad[c] <=> fol[c] + 2 nadh[c] + 2 h[c]	TRUE	AB395_RS09230 or AB395_RS13680 or AB395_RS10090 or AB395_RS13870 or AB395_RS01230	-1000	1000	Folate Biosynthesis	1.5.1.3	R00937	rxn00685	[]	[]	[]	[]	new reaction
671	r_0675	SBO:0000176	chorismate:L-glutamine aminotransferase	chor[c] + gln__L[c] <=> 4adcho[c] + glu__L[c]	TRUE	AB395_RS15250	-1000	1000	Folate Biosynthesis	2.6.1.85	R01716	rxn01257	ABZ1; ADCS	PABASYN-RXN	MNXR95440	11675	new reaction
672	r_0676	SBO:0000176	L-Proline:NADP+ 5-oxidoreductase	pro__L[c] + nadp[c] <=> 1pyr5c[c] + nadph[c] + h[c]	TRUE	AB395_RS16160 and AB395_RS11260	-1000	1000	Arginine and Proline Metabolism	1.5.1.2	R01251	rxn00931	P5CR; PRO3_1	PYRROLINECARBREDUCT-RXN	MNXR116172	14107	new reaction
673	r_0678	SBO:0000176	meso-tartaric acid:NAD+ oxidoreductase	tartr__M[c] + nad[c] <=> 23oxsucc[c] + nadh[c] + h[c]	TRUE	AB395_RS26805	-1000	1000	Glyoxylate and dicarboxylate metabolism	1.1.1.93	R02545	rxn01847	TARTRDH2	RXN-8643	MNXR104721	[]	new reaction
674	r_0679	SBO:0000176	(R)-Glycerate:NADP+ oxidoreductase	glyc__R[c] + nadp[c] <=> 2h3oppan[c] + nadph[c] + h[c]	TRUE	AB395_RS21970	-1000	1000	Glyoxylate and dicarboxylate metabolism	1.1.1.60	R01747	rxn01281	[]	TSA-REDUCT-RXN	MNXR124078	18843	new reaction
675	r_0680	SBO:0000176	hydroxypyruvate aldose-ketose-isomerase	hpyr[c] <=> 2h3oppan[c]	TRUE	AB395_RS21965	-1000	1000	Glyoxylate and dicarboxylate metabolism	5.3.1.22	R01394	rxn01015	HPYRI	RXN0-305	MNXR100692	11955	new reaction
676	r_0681	SBO:0000176	glyoxylate carboxy-lyase (dimerizing; tartronate-semialdehyde-forming)	2 glx[c] <=> 2h3oppan[c] + co2[c]	TRUE	AB395_RS21960	-1000	1000	Glyoxylate and dicarboxylate metabolism	4.1.1.47	R00013	rxn00010	GLXCBL; GLXCL	GLYOCARBOLIG-RXN	MNXR100303	10137	new reaction
677	r_0682	SBO:0000176	glycolate:acceptor 2-oxidoreductase	glyclt[c] + acptr[c] <=> glx[c] + racptr[c]	TRUE	AB395_RS02065	-1000	1000	Glyoxylate and dicarboxylate metabolism	1.1.99.14	R00476	rxn05851	[]	GLYCOLATEDEHYDRO-RXN	MNXR115944	21264	new reaction
678	r_0683	SBO:0000176	1,2-Ethanediol:NAD+ oxidoreductase	etgl[c] + nad[c] <=> gcald[c] + nadh[c] + h[c]	TRUE	AB395_RS00480 or AB395_RS08760 or AB395_RS09800 or AB395_RS12225 or AB395_RS18840 or AB395_RS21780 or AB395_RS23700	-1000	1000	Glyoxylate and dicarboxylate metabolism	1.1.1.-	R01781	rxn01305	[]	GLYCOLALDREDUCT-RXN	MNXR107167	27633	new reaction
679	r_0684	SBO:0000176	acetyl-CoA:glyoxylate C-acetyltransferase (thioester-hydrolysing, carboxymethyl-forming); L-Malate glyoxylate-lyase (CoA-acetylating)	mal__L[c] + coa[c] <=> accoa[c] + h2o[c] + glx[c]	TRUE	AB395_RS18270	-1000	1000	Glyoxylate and dicarboxylate metabolism	2.3.3.9	R00472	rxn00330	DAL7; MALS; MALSp; MLS1	MALSYN-RXN	MNXR101347	18182	new reaction
680	r_0685	SBO:0000176	formate:NAD+ oxidoreductase	for[c] + nad[c] <=> co2[c] + nadh[c]	TRUE	AB395_RS16630	-1000	1000	Glyoxylate and dicarboxylate metabolism	1.17.1.9	R00519	rxn00371	FDH; FDH1; FDHr; YPL275W; YPL276W	1.2.1.2-RXN	MNXR99475	15988	new reaction
681	r_0687	SBO:0000176	2-Hydroxyethylenedicarboxylate carboxy-lyase (pyruvate-forming)	eoaa[c] <=> pyr[c] + co2[c]	TRUE	AB395_RS04455 or AB395_RS29215	-1000	1000	Pyruvate metabolism	4.1.1.-	R00219	rxn00164	[]	[]	[]	[]	new reaction
682	r_0688	SBO:0000176	(R)-S-Lactoylglutathione methylglyoxal-lyase (isomerizing)	lgt__S[c] <=> gthrd[c] + mthgxl[c]	TRUE	AB395_RS06655	-1000	1000	Pyruvate metabolism	4.4.1.5	R02530	rxn01834	GLO1; LGTHL	GLYOXI-RXN	MNXR100355	19072	new reaction
683	r_0689	SBO:0000176	(R)-S-Lactoylglutathione hydrolase	lgt__S[c] + h2o[c] <=> gthrd[c] + lac__D[c]	TRUE	AB395_RS14075	-1000	1000	Pyruvate metabolism	3.1.2.6	R01736	rxn01274	GLYOX; GLYOXm	GLYOXII-RXN	MNXR100353	25245	new reaction
684	r_0690	SBO:0000176	acetyl adenylate:CoA acetyltransferase	HC01672[c] + coa[c] <=> amp[c] + accoa[c] + h[c]	TRUE	AB395_RS17855 or AB395_RS17855	-1000	1000	Pyruvate metabolism	6.2.1.1	R00236	rxn00176	[]	[]	[]	[]	new reaction
685	r_0692	SBO:0000176	1-(5'-Phosphoribosyl)-5-amino-4-imidazolecarboxamide:pyrophosphate phosphoribosyltransferase	aicar[c] + ppi[c] <=> 5a4icam[c] + prpp[c]	TRUE	AB395_RS11505	-1000	1000	Purine Metabolism	2.4.2.7	R04378	rxn03039	[]	RXN-14270	MNXR95483	31138	new reaction
686	r_0693	SBO:0000176	ATP:dIDP phosphotransferase	atp[c] + didp[c] <=> adp[c] + ditp[c]	TRUE	AB395_RS04100	-1000	1000	Purine Metabolism	2.7.4.6	R03530	rxn02517	[]	RXN-14228	MNXR101934	30942	new reaction
687	r_0694	SBO:0000176	5-amino-1-(5-phospho-D-ribosyl)imidazole:carbon-dioxide ligase (ADP-forming)	atp[c] + air[c] + hco3[c] -> adp[c] + pi[c] + 5ca1rpi[c]	FALSE	AB395_RS15190	0	1000	Purine Metabolism	6.3.4.18	R07404	rxn05114	AIRC2; AIRC2r	RXN0-742	MNXR111053	19318	new reaction
688	r_0695	SBO:0000176	5-carboxyamino-1-(5-phospho-D-ribosyl)imidazole carboxymutase	5aizc[c] + e[c] -> 5ca1rpi[c]	FALSE	AB395_RS15185	0	1000	Purine Metabolism	5.4.99.18	R07405	rxn05115	AIRC3	RXN0-743	MNXR95645	13194	new reaction
689	r_0696	SBO:0000176	2'-deoxyguanosine 5'-triphosphate diphosphohydrolase	dgtp[c] + h2o[c] -> dgmp[c] + ppi[c]	FALSE	AB395_RS16785 or AB395_RS17110 or AB395_RS21070	0	1000	Purine Metabolism	3.6.1.-	R01855	rxn01351	NTPP1	RXN0-385	MNXR102049	28362	new reaction
690	r_0697	SBO:0000176	2'-deoxyguanosine 5'-diphosphate:oxidized-thioredoxin 2'-oxidoreductase	gdp[c] + trdrd[c] -> dgdp[c] + trdox[c] + h2o[c]	FALSE	AB395_RS07730 and AB395_RS29155 and AB395_RS29160	0	1000	Purine Metabolism	1.17.4.1	R02019	rxn05233	RNDR2; RNDR2n	GDPREDUCT-RXN	MNXR104062	28032	new reaction
691	r_0698	SBO:0000176	GTP diphosphohydrolase (diphosphate-forming); Guanosine 5'-triphosphate pyrophosphohydrolase	gtp[c] + h2o[c] -> gmp[c] + ppi[c]	FALSE	AB395_RS05910	0	1000	Purine Metabolism	3.6.1.9	R00426	rxn00301	NTPP2	RXN-14140	MNXR102052	29394	new reaction
692	r_0699	SBO:0000176	guanosine 3'-phosphate phosphohydrolase	3gmp[c] + h2o[c] -> gsn[c] + pi[c]	FALSE	AB395_RS06250	0	1000	Purine Metabolism	3.1.3.6	R02148	rxn01549	3NTD9pp; 3NUCLE4	RXN-14124	MNXR94936	27865	new reaction
693	r_0700	SBO:0000176	nucleoside-diphosphate kinase	dzdp[c] + atp[c] -> dztp[c] + adp[c]	FALSE	AB395_RS04100	0	1000	Purine Metabolism	2.7.4.6	R12853	[]	[]	[]	[]	[]	new reaction
694	r_0701	SBO:0000176	guanylate kinase	dzmp[c] + atp[c] -> dzdp[c] + adp[c]	FALSE	AB395_RS04015	0	1000	Purine Metabolism	2.7.4.8	R12852	[]	[]	[]	[]	[]	new reaction
695	r_0702	SBO:0000176	adenylosuccinate lyase	dsmp[c] -> dzmp[c] + fum[c]	FALSE	AB395_RS07505	0	1000	Purine Metabolism	4.3.2.2	R12851	[]	[]	[]	[]	[]	new reaction
696	r_0703	SBO:0000176	Xanthosine-5'-phosphate:ammonia ligase (AMP-forming)	atp[c] + xmp[c] + nh3[c] -> amp[c] + ppi[c] + gmp[c]	FALSE	AB395_RS19925	0	1000	Purine Metabolism	6.3.5.2	R01230	rxn00916	GMPS	GMP-SYN-NH3-RXN	MNXR100383	18302	new reaction
697	r_0704	SBO:0000176	ATP:IDP phosphotransferase	atp[c] + idp[c] <=> adp[c] + itp[c]	TRUE	AB395_RS04100	-1000	1000	Purine Metabolism	2.7.4.6	R00722	rxn00515	NDPK9; YNK1_9	RXN-14120	MNXR101941	30350	new reaction
698	r_0705	SBO:0000176	xanthine:NAD+ oxidoreductase	xan[c] + nad[c] + h2o[c] -> urate[c] + nadh[c] + h[c]	FALSE	AB395_RS11795 and AB395_RS11800 and AB395_RS25195 and AB395_RS25200	0	1000	Purine Metabolism	1.17.1.4	R02103	rxn01522	XAND; XANDb	RXN0-901	MNXR105225	16672	new reaction
699	r_0706	SBO:0000176	hypoxanthine:NAD+ oxidoreductase	hxan[c] + nad[c] + h2o[c] -> xan[c] + nadh[c] + h[c]	FALSE	AB395_RS11795 and AB395_RS11800 and AB395_RS25195 and AB395_RS25200	0	1000	Purine Metabolism	1.17.1.4	R01768	rxn01297	HXAND; XANDa	RXN-7682	MNXR100747	24671	new reaction
700	r_0707	SBO:0000176	ATP diphosphohydrolase (diphosphate-forming); ATP pyrophosphohydrolase	atp[c] + h2o[c] -> amp[c] + ppi[c]	FALSE	AB395_RS05910	0	1000	Purine Metabolism	3.6.1.9	R00087	rxn00063	NTPP6	ATP-PYROPHOSPHATASE-RXN	MNXR102054	14246	new reaction
701	r_0708	SBO:0000176	2'-deoxyadenosine 5'-diphosphate:oxidized-thioredoxin 2'-oxidoreductase	trdrd[c] + adp[c] -> dadp[c] + trdox[c] + h2o[c]	FALSE	AB395_RS11795 and AB395_RS11800 and AB395_RS25195 and AB395_RS25200	0	1000	Purine Metabolism	1.17.4.1	R02017	rxn05231	RIBRB12; RNDR1; RNDR1n	ADPREDUCT-RXN	MNXR104060	28036	new reaction
702	r_0709	SBO:0000176	ATP:dADP phosphotransferase	atp[c] + dadp[c] <=> adp[c] + datp[c]	TRUE	AB395_RS04100	-1000	1000	Purine Metabolism	2.7.4.6	R01137	rxn00839	NDPK8; YNK1_7	DADPKIN-RXN	MNXR101940	27675	new reaction
703	r_0710	SBO:0000176	ATP:dAMP phosphotransferase	atp[c] + damp[c] <=> adp[c] + dadp[c]	TRUE	AB395_RS05430	-1000	1000	Purine Metabolism	2.7.4.3	R01547	rxn01127	DADK; U19	DEOXYADENYLATE-KINASE-RXN	MNXR96117	23101	new reaction
704	r_0711	SBO:0000176	Ureidoglycine aminohydrolase; (S)-ureidoglycine aminohydrolase	urdgci[c] + h2o[c] <=> urdglyc[c] + nh3[c]	TRUE	AB395_RS21940	-1000	1000	Purine Metabolism	3.5.3.26	R05554	rxn03842	[]	URUR-RXN	MNXR109676	25242	new reaction
705	r_0712	SBO:0000176	Allantoate amidinohydrolase	alla[c] + h2o[c] <=> urdglyc[c] + urea[c]	TRUE	AB395_RS21940	-1000	1000	Purine Metabolism	3.5.3.4	R02422	rxn01746	ALLTAH; ALLTAHr; DAL2	ALLANTOICASE-RXN	MNXR95767	11017	new reaction
706	r_0713	SBO:0000176	(S)-ureidoglycolate urea-lyase (glyoxylate-forming)	urdglyc[c] <=> glx[c] + urea[c]	TRUE	AB395_RS11840	-1000	1000	Purine Metabolism	4.3.2.3	R00776	rxn00562	[]	UREIDOGLYCOLATE-LYASE-RXN	MNXR106681	11305	new reaction
707	r_0714	SBO:0000176	adenosine 3'-phosphate phosphohydrolase	3amp[c] + h2o[c] -> adn[c] + pi[c]	FALSE	AB395_RS06250	0	1000	Purine Metabolism	3.1.3.6	R01562	rxn01139	3NTD7pp; 3NUCLE1	RXN-14126	MNXR94935	27901	new reaction
708	r_0715	SBO:0000176	Fe(II):oxygen oxidoreductase; Fe2+:oxygen oxidoreductase	o2[c] + 4 fe2[c] + 4 h[c] -> 4 fe3[c] + 2 h2o[c]	FALSE	AB395_RS17115	0	1000	Porphyrin Metabolism	1.16.3.1	R00078	rxn00056	FEROpp	RXN0-1483	MNXR99561	11149	new reaction
709	r_0716	SBO:0000176	Uroporphyrinogen I carboxy-lyase	uppg1[c] -> cpppg1[c] + 4 co2[c]	FALSE	AB395_RS17945	0	1000	Porphyrin Metabolism	4.1.1.37	R04972	rxn03384	UPPDC2	RXN-10642	MNXR105141	31239	new reaction
710	r_0717	SBO:0000176	coproporphyrinogen-III:S-adenosyl-L-methionine oxidoreductase(decarboxylating)	cpppg3[c] + 2 amet[c] -> pppg9[c] + 2 co2[c] + 2 met__L[c] + 2 dad_5[c]	FALSE	AB395_RS04510	0	1000	Porphyrin and Chlorophyll Metabolism	1.3.98.3	R06895	rxn04704	CPPPGO2	HEMN-RXN	MNXR96881	15426	new reaction
711	r_0718	SBO:0000176	precorrin-3A,NADH:oxygen oxidoreductase (20-hydroxylating)	pre3a[c] + o2[c] + nadh[c] + h[c] -> pre3b[c] + nad[c] + h2o[c]	FALSE	AB395_RS15940	0	1000	Porphyrin and Chlorophyll Metabolism	1.14.13.83	R05217	rxn03532	P3Bs	R321-RXN	MNXR139345	17294	new reaction
712	r_0719	SBO:0000176	S-adenosyl-L-methionine:precorrin-3B C17-methyltransferase	amet[c] + pre3b[c] -> ahcys[c] + pre4[c]	FALSE	AB395_RS15925	0	1000	Porphyrin and Chlorophyll Metabolism	2.1.1.131	R05180	rxn03513	PC17M	2.1.1.131-RXN	MNXR138687	12761	new reaction
713	r_0720	SBO:0000176	S-adenosyl-L-methionine:precorrin-4 C11 methyltransferase	amet[c] + pre4[c] -> ahcys[c] + pre5[c]	FALSE	AB395_RS15910	0	1000	Porphyrin and Chlorophyll Metabolism	2.1.1.133	R05181	rxn03514	PC11M	2.1.1.133-RXN	MNXR138686	22013	new reaction
714	r_0721	SBO:0000176		pre5[c] + amet[c] + h2o[c] -> pre6a[c] + ac[c] + ahcys[c]	FALSE	AB395_RS15945	0	1000	Porphyrin and Chlorophyll Metabolism	2.1.1.152	R05219	rxn03534	PRE5	R322-RXN	MNXR103404	18262	new reaction
715	r_0722	SBO:0000176	pyridoxamine:oxygen oxidoreductase (deaminating)	pydam[c] + h2o[c] + o2[c] -> pydx[c] + nh3[c] + h2o2[c] + h[c]	FALSE	AB395_RS29500 or AB395_RS02675	0	1000	Vitamin B6 Metabolism	1.4.3.5	R01710	rxn01251	PDX3_4	RXN-14203	MNXR103367	30778	new reaction
716	r_0723	SBO:0000176	beta-D-Fructose 6-phosphate:D-glyceraldehyde-3-phosphate glycolaldehyde transferase	f6p[c] + g3p[c] <=> e4p[c] + xu5p__D[c]	TRUE	AB395_RS15035 or AB395_RS25685	-1000	1000	Pentose Phosphate Pathway	2.2.1.1	R01830	rxn15271	[]	2TRANSKETO-RXN	MNXR104869	27629	new reaction
717	r_0725	SBO:0000176	ribokinase reversible	2dr5p[c] + adp[c] <=> 5drib[c] + atp[c]	TRUE	AB395_RS25105 or AB395_RS00280	-1000	1000	Pentose Phosphate Pathway	2.7.1.15	R02750	rxn01987	DRBK; DRBKr; RBK1_2	RXN-14223	MNXR118567	30874	new reaction
718	r_0726	SBO:0000176	phosphopentomutase	2dr1p[c] -> 2dr5p[c]	FALSE	AB395_RS18655 or AB395_RS15525	0	1000	Purine Metabolism	5.4.2.7	R02749	rxn01986	PPM2	D-PPENTOMUT-RXN	MNXR103116	27661	new reaction
719	r_0727	SBO:0000176		3sulac[c] + nad[c] <=> 3spyr[c] + nadh[c] + h[c]	TRUE	AB395_RS16855	-1000	1000	Cysteine and Methionine Metabolism	1.1.1.37	R07136	[]	[]	[]	[]	[]	new reaction
720	r_0728	SBO:0000176	phosphoenolpyruvate synthase	atp[c] + pyr[c] + pi[c] + h[c] <=> amp[c] + pep[c] + ppi[c]	TRUE	AB395_RS02910	-1000	1000	Glycolysis / Gluconeogenesis	2.7.9.1	R00206	rxn00151	PPDK	PYRUVATEORTHOPHOSPHATE-DIKINASE-RXN	MNXR103107	10756	new reaction
721	r_0729	SBO:0000176	NAD-dependent threonine 4-phosphate dehydrogenase	phthr[c] + nad[c] -> 2a3o4pob[c] + nadh[c] + 2 h[c]	FALSE	(AB395_RS23705 or AB395_RS21590 or AB395_RS04025) and AB395_RS09885	0	1000	Vitamin B6 Metabolism	1.1.1.262	R05681	rxn03951	THPDH	[]	[]	[]	new reaction
722	r_0731	SBO:0000185		atp[c] + h2o[c] + lps[c] -> adp[c] + pi[c] + lps[e]	FALSE	AB395_RS00095 or AB395_RS04040 or AB395_RS04045	0	1000	[]	7.5.2.5	[]	[]	[]	[]	[]	[]	new reaction
723	r_0732	SBO:0000176	UTP:[protein-PII] uridylyltransferase	utp[c] + nrp[c] <=> ppi[c] + unrp[c]	TRUE	AB395_RS00165	-1000	1000	[]	2.7.7.59	R04733	rxn06776	[]	[]	[]	[]	new reaction
724	r_0733	SBO:0000176	L-threonylcarbamoyladenylate:adenine in tRNA N6-L-threonylcarbamoyltransferase	lthrcala[c] + trnaadn[c] <=> amp[c] + n6lthrtrna[c]	TRUE	AB395_RS00195 and AB395_RS17245	-1000	1000	[]	2.3.1.234	R10648	rxn40394	[]	[]	[]	[]	new reaction
725	r_0734	SBO:0000176	tRNA (N6-dimethylallyladenosine):sulfur-donor,S-adenosyl-L-methionine C2-methylthiotransferase	trna6iso[c] + sdo[c] + 2 amet[c] <=> 2mn6ditrna[c] + ahcys[c] + met__L[c] + dad_5[c]	TRUE	AB395_RS00210	-1000	1000	[]	2.8.4.3	R10645	rxn40391	[]	[]	[]	[]	new reaction
726	r_0735	SBO:0000176		trna6iso[c] + sdo[c] + amet[c] <=> 2tn6ditrna[c] + met__L[c] + dad_5[c]	TRUE	AB395_RS00210	-1000	1000	[]	2.8.4.3	R10646	[]	[]	[]	[]	[]	new reaction
727	r_0736	SBO:0000176		2tn6ditrna[c] + amet[c] <=> 2mn6ditrna[c] + ahcys[c]	TRUE	AB395_RS00210	-1000	1000	[]	2.8.4.3	R10647	[]	[]	[]	[]	[]	new reaction
728	r_0737	SBO:0000176	Formyl-L-methionyl peptide amidohydrolase	forlmepep[c] + h2o[c] <=> mepep[c] + for[c]	TRUE	AB395_RS00295 or AB395_RS05570	-1000	1000	[]	3.5.1.88	R05635	rxn06947	[]	3.5.1.88-RXN	MNXR109727	24421	new reaction
729	r_0738	SBO:0000176	tRNA-uridine uracilmutase	trnauri[c] <=> trnapse[c]	TRUE	AB395_RS00305	-1000	1000	[]	5.4.99.12	R03020	rxn06298	[]	TRNA-PSEUDOURIDINE-SYNTHASE-I-RXN	MNXR124072	22377	new reaction
730	r_0739	SBO:0000176	peptide-methionine:thioredoxin-disulfide S-oxidoreductase	pep_met__L[c] + trdox[c] + h2o[c] <=> pep_met_LRS[c] + trdrd[c]	TRUE	AB395_RS00405 or AB395_RS03265 or AB395_RS27575 or AB395_RS33650	-1000	1000	[]	1.8.4.12	R07607	rxn07438	[]	1.8.4.12-RXN	MNXR115003	24164	new reaction
731	r_0740	SBO:0000176	S-Adenosyl-L-methionine:protein-C-terminal-S-farnesyl-L-cysteine O-methyltransferase	amet[c] + procslcys[c] <=> ahcys[c] + procslmees[c]	TRUE	AB395_RS00470 or AB395_RS05585 or AB395_RS07885 or AB395_RS08985 or AB395_RS10735 or AB395_RS14170	-1000	1000	Terpenoid Backbone Biosynthesis	2.1.1.100	R04496	rxn06710	[]	2.1.1.100-RXN	MNXR115033	[]	new reaction
732	r_0741	SBO:0000176	S-adenosyl-L-methionine:methanethiol S-methyltransferase	amet[c] + ch4s[c] <=> ahcys[c] + dms[c]	TRUE	AB395_RS00470 or AB395_RS05585 or AB395_RS08985 or AB395_RS10735 or AB395_RS14170	-1000	1000	[]	2.1.1.334	R11546	[]	[]	RXN-17813	MNXR114839	50429	new reaction
733	r_0742	SBO:0000176	ATP:polyphosphate phosphotransferase	atp[c] + popp[c] -> adp[c] + popp[c]	FALSE	AB395_RS00645 or AB395_RS04225 or AB395_RS09270 or AB395_RS19315	0	1000	[]	2.7.4.1	R02184	rxn06117	[]	POLYPHOSPHATE-KINASE-RXN	MNXR116144	19576	new reaction
734	r_0743	SBO:0000176	UDP-glucose 4-epimerase; UDP-alpha-D-glucose 4-epimerase	udpg[c] <=> udpgal[c]	TRUE	AB395_RS00880 or AB395_RS23140 or AB395_RS23330	-1000	1000	Amino sugar and nucleotide sugar metabolism	5.1.3.2	R00291	rxn00214	GAL10; UDPG4E	UDPGLUCEPIM-RXN	MNXR143428	22171	new reaction
735	r_0744	SBO:0000176	Phosphoprotein phosphohydrolase	pppro[c] + h2o[c] <=> protein[c] + pi[c]	TRUE	AB395_RS01070	-1000	1000	[]	3.1.3.16	R00164	rxn05782	[]	[]	[]	[]	new reaction
736	r_0745	SBO:0000176	Phosphoenolpyruvate:UDP-N-acetyl-D-glucosamine 1-carboxyvinyl-transferase	pep[c] + uacgam[c] <=> uaccg[c] + pi[c]	TRUE	AB395_RS01185	-1000	1000	Amino sugar and nucleotide sugar metabolism	2.5.1.7	R00660	rxn00461	UAGCVT	UDPNACETYLGLUCOSAMENOLPYRTRANS-RXN	MNXR105032	18682	new reaction
737	r_0746	SBO:0000176	UDP-alpha-D-galactopyranose furanomutase	udpgal[c] <=> uadgafu[c]	TRUE	AB395_RS01265	-1000	1000	Galactose metabolism	5.4.99.9	R00505	rxn00358	UDPGALM	GALPMUT-RXN	MNXR105058	24135	new reaction
738	r_0747	SBO:0000176	Protein glutamine amidohydrolase	pglumi[c] + h2o[c] <=> pgluma[c] + nh3[c]	TRUE	AB395_RS01385	-1000	1000	[]	3.5.1.44	R02622	rxn06194	[]	CHEBDEAMID-RXN	MNXR115764	16442	new reaction
739	r_0748	SBO:0000176	Acyl-CoA hydrolase	acoa[c] + h2o[c] <=> coa[c] + carbo[c]	TRUE	AB395_RS01810 or AB395_RS08645	-1000	1000	[]	3.1.2.20	R00383	rxn05824	[]	[]	[]	[]	new reaction
740	r_0749	SBO:0000176	tRNA(adenine34) aminohydrolase	trnaadn[c] + h2o[c] <=> trnahythi[c] + nh3[c]	TRUE	AB395_RS02190 or AB395_RS05915 or AB395_RS16705	-1000	1000	[]	3.5.4.33	R10223	rxn40086	[]	RXN-13997	MNXR118468	[]	new reaction
741	r_0750	SBO:0000176	S-adenosyl-L-methionine:rRNA (guanine-N2-)-methyltransferase	amet[c] + rrna[c] <=> ahcys[c] + rrnan2me[c]	TRUE	AB395_RS02200 or AB395_RS19510	-1000	1000	[]	2.1.1.171 or 2.1.1.172 or 2.1.1.174	R07234	rxn07214	[]	RXN-11635	MNXR117059	42745	new reaction
742	r_0751	SBO:0000176	CMP-3-deoxy-D-manno-oct-2-ulosonate:lipid IVA 3-deoxy-D-manno-oct-2-ulosonate transferase	tetdglu16d14bis[c] + ckdo[c] <=> 3ddol[c] + cmp[c]	TRUE	AB395_RS02230	-1000	1000	Lipopolysaccharide biosynthesis	2.4.99.12	R04658	rxn03182	MOAT	KDOTRANS-RXN	MNXR101683	28067	new reaction
743	r_0752	SBO:0000176	ATP:2,3,2',3'-tetrakis(3-hydroxytetradecanoyl)-D-glucosaminyl-beta-D-1,6-glucosaminyl-alpha-phosphate 4-O'-phosphotransferase	atp[c] + lipidAds[c] -> adp[c] + tetdglu16d14bis[c]	FALSE	AB395_RS02240	0	1000	Lipopolysaccharide biosynthesis	2.7.1.130	R04657	rxn03181	TDSK	TETRAACYLDISACC4KIN-RXN	MNXR104762	20701	new reaction
744	r_0753	SBO:0000176	2-dehydro-3-deoxy-6-phospho-D-galactonate D-glyceraldehyde-3-phospho-lyase (pyruvate-forming)	2dh3dgal6p[c] <=> pyr[c] + g3p[c]	TRUE	AB395_RS02280	-1000	1000	Galactose metabolism	4.1.2.21	R01064	rxn00783	DDPGALA	DEHYDDEOXPHOSGALACT-ALDOL-RXN	MNXR97220	24467	new reaction
745	r_0754	SBO:0000176	GTP:GTP guanylyltransferase	2 gtp[c] <=> 35cdigmp[c] + 2 ppi[c]	TRUE	AB395_RS02500 or AB395_RS07080 or AB395_RS07620 or AB395_RS08415 or AB395_RS09205 or AB395_RS10180 or AB395_RS15335 or AB395_RS26735 or AB395_RS27530	-1000	1000	[]	2.7.7.65	R08057	rxn07846	[]	RXN0-5359	MNXR111638	[]	new reaction
746	r_0755	SBO:0000176	cyclic bis(3->5')diguanylate 3-guanylylhydrolase	35cdigmp[c] + h2o[c] <=> 5pg35pg[c]	TRUE	AB395_RS02500	-1000	1000	[]	3.1.4.52	R08991	rxn14146	[]	RXN0-4181	MNXR112477	24903	new reaction
747	r_0756	SBO:0000176	polyisopentenylpyrolinate:4-hydroxybenzoate nonaprenyltransferase	5pg35pg[c] + 4hbz[c] <=> 4h3pb[c] + ppi[c]	TRUE	AB395_RS02520	-1000	1000	Ubiquinone and other terpenoid-quinone biosynthesis	2.5.1.39	R05000	rxn11643	[]	RXN-11368	MNXR116884	[]	new reaction
748	r_0757	SBO:0000176	ATP:L-threonyl,bicarbonate adenylyltransferase	thr__L[c] + atp[c] + hco3[c] + h[c] -> lthrcala[c] + ppi[c] + h2o[c]	FALSE	AB395_RS02540	0	1000	Nucleic Acid Processing	2.7.7.87	R10463	rxn40257	[]	RXN-14569	MNXR113802	36410	new reaction
749	r_0758	SBO:0000176	Choline sulfate sulfohydrolase	chols[c] + h2o[c] <=> chol[c] + so4[c]	TRUE	AB395_RS03030	-1000	1000	Amine and Polyamine Degradation	3.1.6.6	R01028	rxn00756	CHOLSH	CHOLINE-SULFATASE-RXN	MNXR96704	20820	new reaction
750	r_0759	SBO:0000176	S-adenosyl-L-methionine:(E)-prop-1-ene-1,2,3-tricarboxylate 2'-O-methyltransferase	amet[c] + acon_T[c] <=> ahcys[c] + e3me2en[c]	TRUE	AB395_RS03130	-1000	1000	[]	2.1.1.144	R05763	rxn04016	ACONMT	RXN0-2441	MNXR95383	14970	new reaction
751	r_0760	SBO:0000176	superoxide:superoxide oxidoreductase	2 sox[c] + 2 h[c] <=> h2o2[c] + o2[c]	TRUE	AB395_RS03170	-1000	1000	superoxide radicals degradation	1.15.1.1	R00275	rxn00206	SOD; SODe; SODr; SPODM; SPODMpp	SUPEROX-DISMUT-RXN	MNXR104498	20697	new reaction
752	r_0761	SBO:0000176	beta-Lactamhydrolase	blac[c] + h2o[c] <=> subbaa[c]	TRUE	AB395_RS03205 or AB395_RS17505	-1000	1000	[]	3.5.2.6	R03743	rxn06469	[]	BETA-LACTAMASE-RXN	MNXR108390	[]	new reaction
753	r_0762	SBO:0000176	[L-glutamate:ammonia ligase (ADP-forming)]-O4-(5'-adenylyl)-L-tyrosine:phosphate adenylyltransferase	adelgluladp[c] + pi[c] -> adp[c] + lgluadp[c]	FALSE	AB395_RS03460	0	1000	[]	2.7.7.89	R03474	rxn06391	[]	GSDEADENYLATION-RXN	MNXR108196	43717	new reaction
754	r_0763	SBO:0000176	Electron-transferring-flavoprotein:ubiquinone oxidoreductase	etfrd[c] + q[c] -> etfox[c] + qh2[c]	FALSE	AB395_RS03505	0	1000	[]	1.5.5.1	R04433	rxn06692	[]	RXN66-550	MNXR123792	24053	new reaction
755	r_0764	SBO:0000176	S-adenosyl-L-methionine:rRNA (adenine-N6-)-dimethyltransferase	2 amet[c] + aderna[c] <=> 2 ahcys[c] + n6dirrna[c]	TRUE	AB395_RS04020	-1000	1000	[]	2.1.1.182	R10716	rxn40451	[]	[]	[]	[]	new reaction
756	r_0765	SBO:0000176		rscys[c] + h2o[c] <=> sslcys[c] + gly[c]	TRUE	AB395_RS04055	-1000	1000	Glutathione Metabolism	3.4.11.1	R04951	rxn12003	[]	[]	[]	[]	new reaction
757	r_0766	SBO:0000176	Deoxynucleoside triphosphate:DNA deoxynucleotidyltransferase	detripp[c] + dna[c] <=> ppi[c] + dna[c]	TRUE	(AB395_RS04060 and AB395_RS04965 and AB395_RS07240 and AB395_RS07950 and AB395_RS17900 and AB395_RS17970 and AB395_RS19425 and AB395_RS20035) or AB395_RS04975 or AB395_RS17125 or AB395_RS18920 or AB395_RS29960	-1000	1000	[]	2.7.7.7 or 2.7.7.49	R00379	rxn15041	[]	[]	[]	[]	new reaction
758	r_0767	SBO:0000176	CDP-diacylglycerol:sn-glycerol-3-phosphate 3-phosphatidyltransferase	cdpdag_cho[c] + sng3p[c] <=> cmp[c] + pgp_cho[c]	TRUE	AB395_RS04135	-1000	1000	Glycerophospholipid metabolism	2.7.8.5	R01801	rxn06045	CDGPT; PGSA	PHOSPHAGLYPSYN-RXN	MNXR107179	12593	new reaction
759	r_0768	SBO:0000176	L-arginyl-tRNA(Arg):protein arginyltransferase	argtrna[c] + protein[c] <=> trnaarg[c] + largp[c]	TRUE	AB395_RS04305	-1000	1000	[]	2.3.2.8	R03862	rxn11996	[]	ARGINYLTRANSFERASE-RXN	MNXR115707	[]	new reaction
760	r_0769	SBO:0000176	acyl-[acyl-carrier protein]:phosphate acyltransferase	acacp[c] + pi[c] <=> actp[c] + ACP[c]	TRUE	AB395_RS04405	-1000	1000	[]	2.3.1.274	R12240	[]	[]	[]	[]	[]	new reaction
761	r_0770	SBO:0000176	UDP-glucose:ditrans,octacis-undecaprenyl-phosphate glucose phosphotransferase	udpg[c] + dtpcudcpp[c] <=> ump[c] + adgddu[c]	TRUE	AB395_RS04630	-1000	1000	[]	2.7.8.31	R09641	rxn16485	[]	[]	[]	[]	new reaction
762	r_0771	SBO:0000176	Biotin:apo-[acetyl-CoA:carbondioxide ligase (ADP-forming)] ligase (AMP-forming)	atp[c] + btn[c] + accb[c] -> amp[c] + ppi[c] + bccp[c]	FALSE	AB395_RS04920	0	1000	[]	6.3.4.15	R04562	rxn06726	[]	[]	[]	[]	new reaction
763	r_0772	SBO:0000176	L-leucyl-tRNA(Leu):[protein] N-terminal L-arginine leucyltransferase	leutrna[c] + largp[c] <=> trnaleu[c] + lleuargp[c]	TRUE	AB395_RS05140	-1000	1000	[]	2.3.2.6	R11444	[]	[]	[]	[]	[]	new reaction
764	r_0773	SBO:0000176	L-leucyl-tRNA(Leu):[protein] N-terminal L-lysine leucyltransferase	leutrna[c] + llysp[c] <=> trnaleu[c] + lleullysp[c]	TRUE	AB395_RS05140	-1000	1000	[]	2.3.2.6	R11443	[]	[]	[]	[]	[]	new reaction
765	r_0774	SBO:0000176	biotin-carboxyl-carrier-protein:carbon-dioxide ligase (ADP-forming)	atp[c] + btnCCP[c] + hco3[c] -> adp[c] + pi[c] + carP[c]	FALSE	AB395_RS05145 and AB395_RS29405	0	1000	[]	6.3.4.14	R04385	rxn06672	BTNC	BIOTIN-CARBOXYL-RXN	MNXR115738	13502	new reaction
766	r_0775	SBO:0000176	S-Formylglutathione hydrolase	Sfglutth[c] + h2o[c] <=> for[c] + gthrd[c]	TRUE	AB395_RS05500 or AB395_RS25815	-1000	1000	Carbon metabolism	3.1.2.12	R00527	rxn00377	SFGTH; SFGTHi; YJL068C	S-FORMYLGLUTATHIONE-HYDROLASE-RXN	MNXR104357	14962	new reaction
767	r_0776	SBO:0000176	phosphoenolpyruvate:D-arabinose-5-phosphate C-(1-carboxyvinyl)transferase (phosphate-hydrolysing, 2-carboxy-2-oxoethyl-forming); 2-dehydro-3-deoxy-D-octonate-8-phosphate D-arabinose-5-phosphate-lyase (pyruvate-phosphorylating)	kdo8p[c] + pi[c] <=> pep[c] + ara5p[c] + h2o[c]	TRUE	AB395_RS05790	-1000	1000	Lipopolysaccharide biosynthesis	2.5.1.55	R03254	rxn02331	KDOPS	KDO-8PSYNTH-RXN	MNXR143775	14054	new reaction
768	r_0777	SBO:0000176	[protein]-N6-(octanoyl)-L-lysine:an [Fe-S] cluster scaffold protein carrying a [4Fe-4S]2+ cluster sulfurtransferase	pn6ocllys[c] + fscspc4f4s[c] + 2 amet[c] + 2 r2f2sf[c] + 8 h[c] <=> pn6rdillys[c] + fscsp[c] + 2 h2s[c] + 4 fe2[c] + 2 met__L[c] + 2 dad_5[c] + 2 fdxo_22[c]	TRUE	AB395_RS05840	-1000	1000	Lipoic acid metabolism	2.8.1.8	R07767	rxn14033	[]	RXN0-949	MNXR123419	16586	new reaction
769	r_0778	SBO:0000176	aceneuramate pyruvate-lyase (N-acetyl-D-mannosamine-forming)	acnm[c] <=> acmana[c] + pyr[c]	TRUE	AB395_RS05950 or AB395_RS16130 or AB395_RS20570 or AB395_RS21045 or AB395_RS23690	-1000	1000	[]	4.1.3.3	R12768	[]	[]	[]	[]	[]	new reaction
770	r_0779	SBO:0000176	5-Dehydro-4-deoxy-D-glucarate hydro-lyase (decarboxylating)	5dh4dglc[c] <=> 25dop[c] + h2o[c] + co2[c]	TRUE	AB395_RS05950 or AB395_RS16130 or AB395_RS20570 or AB395_RS21045 or AB395_RS23690 or AB395_RS27595	-1000	1000	Ascorbate and aldarate metabolism	4.2.1.41	R02279	rxn01634	D4DGCD	4.2.1.41-RXN	MNXR107425	24609	new reaction
771	r_0780	SBO:0000176	(3R)-3-hydroxyacyl-[acyl-carrier protein]:UDP-3-O-[(3R)-3-hydroxyacyl]-alpha-D-glucosamine N-acyltransferase	3haACP[c] + u3dcga[c] <=> u2n3ob3hdg[c] + ACP[c]	TRUE	AB395_RS06095	-1000	1000	[]	2.3.1.191	R12803	[]	[]	[]	[]	[]	new reaction
772	r_0781	SBO:0000176	(3R)-3-hydroxyacyl-[acyl-carrier protein]:UDP-N-acetyl-alpha-D-glucosamine 3-O-(3-hydroxyacyl)transferase	3haACP[c] + uacgam[c] <=> ACP[c] + u3o3r3hnadg[c]	TRUE	AB395_RS06105	-1000	1000	[]	2.3.1.129	R12920	[]	[]	[]	[]	[]	new reaction
773	r_0782	SBO:0000176	UDP-2,3-bis(3-hydroxytetradecanoyl)glucosamine:2,3-bis-(3-hydroxytetradecanoyl)-alpha-D-glucosaminyl-1-phosphate 2,3-bis(3-hydroxytetradecanoyl)-glucosaminyltransferase	u23ga[c] + lx[c] <=> udp[c] + lipidAds[c]	TRUE	AB395_RS06115	-1000	1000	Lipopolysaccharide biosynthesis	2.4.1.182	R04606	rxn03159	[]	LIPIDADISACCHARIDESYNTH-RXN	MNXR101119	22669	new reaction
774	r_0783	SBO:0000176	chitobiose N-acetylglucosaminohydrolase	chitob[c] + h2o[c] <=> 2 acgam[c]	TRUE	AB395_RS06210	-1000	1000	Amino sugar and nucleotide sugar metabolism	3.2.1.52	R00022	rxn00016	HXAD	RXN-12625	MNXR95628	30674	new reaction
775	r_0784	SBO:0000176	3'-ribonucleotide phosphohydrolase	3rinct[c] + h2o[c] <=> ribbc[c] + pi[c]	TRUE	AB395_RS06250	-1000	1000	[]	3.1.3.6	R03060	rxn02195	[]	3-NUCLEOTID-RXN	MNXR115235	10145	new reaction
776	r_0785	SBO:0000176	S-Adenosyl-L-methionine:protein-L-isoaspartate O-methyltransferase	amet[c] + pliso[c] <=> ahcys[c] + plisome[c]	TRUE	AB395_RS06255 or AB395_RS06765	-1000	1000	[]	2.1.1.77	R04190	rxn06614	[]	2.1.1.77-RXN	MNXR115050	12706	new reaction
777	r_0786	SBO:0000176	Peptidylproline cis-trans-isomerase	ptpl180[c] <=> ptpl0[c]	TRUE	AB395_RS06445 and AB395_RS07850 and AB395_RS07855 and AB395_RS13745	-1000	1000	[]	5.2.1.8	R04273	rxn06633	[]	PEPTIDYLPROLYL-ISOMERASE-RXN	MNXR108777	16240	new reaction
778	r_0787	SBO:0000176	UTP:N-acetyl-alpha-D-glucosamine-1-phosphate uridylyltransferase	utp[c] + acgam1p[c] <=> ppi[c] + uacgam[c]	TRUE	AB395_RS06950	-1000	1000	Amino sugar and nucleotide sugar metabolism	2.7.7.23	R00416	rxn00293	UAGDP; UAGDPr	NAG1P-URIDYLTRANS-RXN	MNXR106519	13510	new reaction
779	r_0788	SBO:0000176	thioredoxin:hydroperoxide oxidoreductase	trdrd[c] + rooh[c] <=> trdox[c] + h2o[c] + roh[c]	TRUE	AB395_RS07600	-1000	1000	[]	1.11.1.24	R12570	[]	[]	[]	[]	[]	new reaction
780	r_0789	SBO:0000176	ATP:1,6-anhydro-N-acetyl-beta-muramate 6-phosphotransferase	atp[c] + anhm[c] + h2o[c] -> adp[c] + acmum6p[c]	FALSE	AB395_RS07615	0	1000	Amino sugar and nucleotide sugar metabolism	2.7.1.170	R12755	[]	[]	[]	[]	[]	new reaction
781	r_0790	SBO:0000176	S-adenosyl-L-methionine:7-aminomethyl-7-deazaguanosine ribosyltransferase (ribosyl isomerizing; L-methionine, adenine releasing)	amet[c] + trna7am7c[c] <=> met__L[c] + ade[c] + epqtrna[c]	TRUE	AB395_RS07860	-1000	1000	[]	2.4.99.17	R10220	[]	[]	[]	[]	[]	new reaction
782	r_0791	SBO:0000176	tRNA-guanosine34:7-aminomethyl-7-carbaguanine tRNA-D-ribosyltransferase	trnagua[c] + preq1[c] <=> trna7am7c[c] + gua[c]	TRUE	AB395_RS07865	-1000	1000	[]	2.4.2.29	R10209	rxn40082	[]	RXN0-1321	MNXR123112	24105	new reaction
783	r_0792	SBO:0000176	UDP-2,3-bis[(3R)-3-hydroxymyristoyl]-alpha-D-glucosamine 2,3-bis[(3R)-3-hydroxymyristoyl]-beta-D-glucosaminyl 1-phosphate phosphohydrolase	u23ga[c] + h2o[c] <=> ump[c] + lx[c]	TRUE	AB395_RS08325	-1000	1000	Lipopolysaccharide biosynthesis	3.6.1.54	R04549	rxn03130	[]	LIPIDXSYNTHESIS-RXN	MNXR105170	25214	new reaction
784	r_0793	SBO:0000176	ATP:1,2-diacylglycerol 3-phosphotransferase	atp[c] + 12dgr_TB[c] -> adp[c] + pa_cho[c]	FALSE	AB395_RS08540	0	1000	Glycerolipid metabolism	2.7.1.107	R02240	rxn06139	DAGK; DAGK_EC	DIACYLGLYKIN-RXN	MNXR115829	10272	new reaction
785	r_0794	SBO:0000176	L-threonine-O-3-phosphate carboxy-lyase	thrp[c] <=> applp[c] + co2[c]	TRUE	AB395_RS08960	-1000	1000	Porphyrin Metabolism	4.1.1.81	R06530	rxn04385	THRPD	4.1.1.81-RXN	MNXR104843	11493	new reaction
786	r_0795	SBO:0000176	hydrogenobyrinic-acid-a,c-diamide:cobalt cobalt-ligase (ADP-forming)	hgbam[c] + cobalt2[c] + atp[c] + h2o[c] -> cob2nda[c] + pi[c] + adp[c] + h[c]	FALSE	AB395_RS08995 and AB395_RS14110 and AB395_RS14115	0	1000	Porphyrin and Chlorophyll Metabolism	6.6.1.2	R05227	rxn03542	COCHL	R342-RXN	MNXR138179	15342	new reaction
787	r_0796	SBO:0000176	2,3-diaminopropanoate ammonia-lyase (adding water; pyruvate-forming)	23dappa[c] + h2o[c] <=> pyr[c] + 2 nh3[c]	TRUE	AB395_RS09170	-1000	1000	[]	4.3.1.15	R00195	rxn00144	DAPAL	4.3.1.15-RXN	MNXR97138	22085	new reaction
788	r_0797	SBO:0000176	S-(hydroxymethyl)glutathione formaldehyde-lyase (glutathione-forming); S-(hydroxymethyl)glutathione synthase	gthrd[c] + fald[c] <=> HC02121[c]	TRUE	AB395_RS09580 or AB395_RS25725	-1000	1000	Carbon metabolism	4.4.1.22	R06982	rxn04791	FALGTHLs; HMGSs	RXN-2961	MNXR99239	22489	new reaction
789	r_0798	SBO:0000176	NADPH:quinone oxidoreductase	nadph[c] + h[c] + qun[c] -> nadp[c] + hqn[c]	FALSE	AB395_RS09865	0	1000	Aminobenzoate degradation	1.6.5.2	R07359	rxn03558	[]	[]	[]	[]	new reaction
790	r_0799	SBO:0000176	Aliphatic amide hydro-lyase	alia[c] <=> nt[c] + h2o[c]	TRUE	AB395_RS09985 and AB395_RS09990	-1000	1000	[]	4.2.1.84	R02826	rxn06257	[]	NITRILE-HYDRATASE-RXN	MNXR116090	[]	new reaction
791	r_0800	SBO:0000176	delta2-isopentenyl-diphosphate:tRNA isopentenyltransferase	dmpp[c] + trnaadn[c] <=> ppi[c] + trna6iso[c]	TRUE	AB395_RS10050	-1000	1000	Zeatin biosynthesis	2.5.1.75	R01122	rxn14073	[]	RXN0-6274	MNXR123279	[]	new reaction
792	r_0801	SBO:0000176	(deoxyribonucleotide)n:5'-phospho-(deoxyribonucleotide)m ligase (AMP-forming, NMN-forming)	nad[c] + dna[c] + 5pdna[c] -> amp[c] + nmn[c] + dna[c]	FALSE	AB395_RS10260	0	1000	[]	6.5.1.2	R00382	rxn15043	[]	DNA-LIGASE-NAD+-RXN	MNXR115854	[]	new reaction
793	r_0802	SBO:0000176	UDP-3-O-[(3R)-3-hydroxyacyl]-N-acetyl-alpha-D-glucosamine amidohydrolase	u3o3r3hnadg[c] + h2o[c] <=> u3dcga[c] + ac[c]	TRUE	AB395_RS10275	-1000	1000	[]	3.5.1.108	R12926	[]	[]	[]	[]	[]	new reaction
794	r_0803	SBO:0000176	D-alanine:D-alanine ligase (ADP-forming)	atp[c] + 2 ala__D[c] -> adp[c] + pi[c] + alaala[c]	FALSE	AB395_RS10295	0	1000	Peptidoglycan biosynthesis	6.3.2.4	R01150	rxn00851	ALAALA; ALAALAr	DALADALALIG-RXN	MNXR95678	11224	new reaction
795	r_0804	SBO:0000176	UDP-N-acetylmuramate:NADP+ oxidoreductase	uamr[c] + nadp[c] <=> uaccg[c] + nadph[c] + h[c]	TRUE	AB395_RS10305	-1000	1000	Amino sugar and nucleotide sugar metabolism	1.3.1.98	R03192	rxn02285	UAPGR	UDPNACETYLMURAMATEDEHYDROG-RXN	MNXR141027	12250	new reaction
796	r_0805	SBO:0000176	UDP-N-acetylmuramate:L-alanine ligase (ADP-forming)	atp[c] + uamr[c] + ala__L[c] -> adp[c] + pi[c] + uama[c]	FALSE	AB395_RS10310	0	1000	Peptidoglycan biosynthesis	6.3.2.8	R03193	rxn02286	UAMAS	UDP-NACMUR-ALA-LIG-RXN	MNXR141024	23373	new reaction
797	r_0806	SBO:0000176	UDP-N-acetyl-D-glucosamine:N-acetyl-alpha-D-muramyl(oyl-L-Ala-gamma-D-Glu-L-Lys-D-Ala-D-Ala)-diphosphoundecaprenol 4-beta-N-acetylglucosaminlytransferase	uaGgla[c] + uacgam[c] <=> uaaGgla[c] + udp[c]	TRUE	AB395_RS10315	-1000	1000	Peptidoglycan biosynthesis	2.4.1.227	R05662	rxn03933	UAGPT2	RXN-8976	MNXR105036	23193	new reaction
798	r_0807	SBO:0000176	UDP-N-acetylmuramoyl-L-alanine:D-glutamate ligase(ADP-forming)	atp[c] + uama[c] + glu__D[c] -> adp[c] + pi[c] + uamag[c]	FALSE	AB395_RS10325	0	1000	Peptidoglycan biosynthesis	6.3.2.9	R02783	rxn02008	UAMAGS	UDP-NACMURALA-GLU-LIG-RXN	MNXR105038	16430	new reaction
799	r_0808	SBO:0000176	UDPMurAc(oyl-L-Ala-D-gamma-Glu-L-Lys-D-Ala-D-Ala):undecaprenyl-phosphate phospho-N-acetylmuramoyl-pentapeptide-transferase	uGgla[c] + dtpcudcpp[c] <=> ump[c] + uaGgla[c]	TRUE	AB395_RS10330	-1000	1000	Peptidoglycan biosynthesis	2.7.8.13	R05629	rxn03903	PAPPT2	RXN-8975	MNXR109724	21923	new reaction
800	r_0809	SBO:0000176	N-Acetylmuramoyl-Ala amidohydrolase	acmama[c] + h2o[c] <=> acmum[c] + ala__L[c]	TRUE	AB395_RS10380	-1000	1000	[]	3.5.1.28	R04112	rxn02875	AMAA	RXN-14267	MNXR118592	31086	new reaction
801	r_0810	SBO:0000176	Carnitine:NAD+ 3-oxidoreductase	cati[c] + nad[c] -> dhcrn[c] + nadh[c] + h[c]	FALSE	AB395_RS10595	0	1000	[]	1.1.1.108	R02395	rxn01725	[]	CARNITINE-3-DEHYDROGENASE-RXN	MNXR107485	25333	new reaction
802	r_0811	SBO:0000176	ATP:glycerol 3-phosphotransferase	atp[c] + glyc[c] -> adp[c] + sng3p[c]	FALSE	AB395_RS11785	0	1000	Glycerolipid metabolism	2.7.1.30	R00847	rxn00615	GLYK; GLYKr; GUT1	GLYCEROL-KIN-RXN	MNXR100348	21647	new reaction
803	r_0812	SBO:0000176	5-hydroxyisourate amidohydrolase	5hiu[c] + h2o[c] <=> 5houdic[c]	TRUE	AB395_RS11835 or AB395_RS25205	-1000	1000	Purine Metabolism	3.5.2.17	R06601	rxn04453	[]	3.5.2.17-RXN	MNXR100652	23737	new reaction
804	r_0813	SBO:0000176	5-hydroxy-2-oxo-4-ureido-2,5-dihydro-1H-imidazole-5-carboxylate carboxy-lyase [(S)-allantoin-forming]	5houdic[c] <=> alltn[c] + co2[c]	TRUE	AB395_RS11845	-1000	1000	Purine Metabolism	4.1.1.97	R06604	rxn04456	[]	RXN-6201	MNXR110386	26302	new reaction
805	r_0814	SBO:0000176	CTP:alpha-D-glucose-1-phosphate cytidylyltransferase	ctp[c] + g1p[c] <=> ppi[c] + cdpglc[c]	TRUE	AB395_RS12040	-1000	1000	Amino sugar and nucleotide sugar metabolism	2.7.7.33	R00956	rxn00702	CDPGLU	2.7.7.33-RXN	MNXR99842	18216	new reaction
806	r_0815	SBO:0000176	CDPglucose 4,6-hydro-lyase	cdpglc[c] <=> cdp4dh6doglc[c] + h2o[c]	TRUE	AB395_RS12045	-1000	1000	Amino sugar and nucleotide sugar metabolism	4.2.1.45	R02426	rxn01750	CDPGHL	CDP-GLUCOSE-46-DEHYDRATASE-RXN	MNXR96556	17156	new reaction
807	r_0816	SBO:0000176	dTDP-4-dehydro-6-deoxy-alpha-D-glucose 3,5-epimerase;	46dd4odtdpglc[c] <=> dtdprham[c]	TRUE	AB395_RS12070 or AB395_RS24825	-1000	1000	Streptomycin biosynthesis	5.1.3.13	R06514	rxn02000	TDPDRE; TDPDREi	DTDPDEHYDRHAMEPIM-RXN	MNXR104759	16969	new reaction
808	r_0817	SBO:0000176	L-iditol:NAD+ 2-oxidoreductase	idt[c] + nad[c] -> srb__L[c] + nadh[c] + h[c]	FALSE	AB395_RS12230	0	1000	[]	1.1.1.14	R07145	rxn04943	[]	L-IDITOL-2-DEHYDROGENASE-RXN	MNXR116005	10163	new reaction
809	r_0818	SBO:0000176	S-Adenosyl-L-methionine:8-amino-7-oxononanoate aminotransferase	amet[c] + 8aonn[c] <=> amob[c] + dann[c]	TRUE	AB395_RS12420	-1000	1000	Biotin metabolism	2.6.1.62	R03231	rxn02312	AMAOT; AMAOTr; BIO3	DAPASYN-RXN	MNXR95806	16864	new reaction
810	r_0819	SBO:0000176	7,8-Diaminononanoate:carbon-dioxide cyclo-ligase	atp[c] + dann[c] + co2[c] -> adp[c] + pi[c] + dtbt[c]	FALSE	AB395_RS12425	0	1000	Biotin metabolism	6.3.3.3	R03182	rxn02277	BIO4; DBTS; DBTSr	DETHIOBIOTIN-SYN-RXN	MNXR97180	15805	new reaction
811	r_0820	SBO:0000176	pimeloyl-CoA:L-alanine C-carboxyhexanoyltransferase (decarboxylating)	pmcoa[c] + ala__L[c] <=> 8aonn[c] + coa[c] + co2[c]	TRUE	AB395_RS12430	-1000	1000	Biotin metabolism	2.3.1.47	R03210	rxn02297	AOXS; AOXSir; AOXSr; U86	7KAPSYN-RXN	MNXR95854	20712	new reaction
812	r_0821	SBO:0000176	dethiobiotin:sulfur sulfurtransferase	dtbt[c] + sdo[c] + 2 amet[c] + 2 e[c] + 2 h[c] <=> btn[c] + 2 met__L[c] + 2 dad_5[c]	TRUE	AB395_RS12435	-1000	1000	[]	2.8.1.6	R01078	rxn05927	[]	2.8.1.6-RXN	MNXR115224	22061	new reaction
813	r_0822	SBO:0000176	2-(1,2-epoxy-1,2-dihydrophenyl)acetyl-CoA isomerase	212e12diac[c] <=> 2oxpaccoa[c]	TRUE	AB395_RS12855	-1000	1000	Phenylalanine metabolism	5.3.3.18	R09837	rxn16678	[]	RXN0-6510	MNXR113239	31846	new reaction
814	r_0823	SBO:0000176	Phenylacetate:CoA ligase	atp[c] + pac[c] + coa[c] -> amp[c] + ppi[c] + phaccoa[c]	FALSE	AB395_RS12865	0	1000	Phenylalanine metabolism	6.2.1.30	R02539	rxn01842	PACCOAL; PACCOALr	RXN-10819	MNXR102315	20957	new reaction
815	r_0824	SBO:0000176	phenylacetyl-CoA:oxygen oxidoreductase (1,2-epoxidizing)	phaccoa[c] + o2[c] + nadph[c] + h[c] -> 212e12diac[c] + h2o[c] + nadp[c]	FALSE	AB395_RS12885 or AB395_RS12895 or AB395_RS12905	0	1000	Phenylalanine metabolism	1.14.13.149	R09838	rxn16679	[]	RXN0-2042	MNXR113240	32172	new reaction
816	r_0825	SBO:0000176	Formaldehyde:NAD+ oxidoreductase	fald[c] + nad[c] + h2o[c] -> for[c] + nadh[c] + h[c]	FALSE	AB395_RS12960	0	1000	Carbon metabolism	1.2.1.46	R00604	rxn00429	ALDD1; ALDD1x	FORMALDEHYDE-DEHYDROGENASE-RXN	MNXR95732	16426	new reaction
817	r_0826	SBO:0000176	Trehalose-6-phosphate phosphohydrolase	tre6p[c] + h2o[c] <=> tre[c] + pi[c]	TRUE	AB395_RS13395	-1000	1000	Starch and sucrose metabolism	3.1.3.12	R02778	rxn02004	TPS2; TRE6PP	TREHALOSEPHOSPHA-RXN	MNXR104926	23420	new reaction
818	r_0827	SBO:0000176	UDP-glucose:D-glucose-6-phosphate 1-alpha-D-glucosyltransferase	udpg[c] + g6p[c] <=> udp[c] + tre6p[c]	TRUE	AB395_RS13400	-1000	1000	[]	2.4.1.15	R00836	rxn00605	TPS1; TPS3; TRE6PS; TSL1	TREHALOSE6PSYN-RXN	MNXR143415	18890	new reaction
819	r_0828	SBO:0000176	S-adenosyl-L-methionine:[protein]-L-glutamine (N5-glutamine)-methyltransferase	pglumi[c] + amet[c] <=> pn5mlglu[c] + ahcys[c]	TRUE	AB395_RS13655	-1000	1000	[]	2.1.1.297	R10806	[]	[]	[]	[]	[]	new reaction
820	r_0829	SBO:0000176	Phosphoenolpyruvate:protein-L-histidine N-pros-phosphotransferase	pep[c] + phis__L[c] <=> pyr[c] + pplhis[c]	TRUE	AB395_RS13665	-1000	1000	[]	2.7.3.9	R02628	rxn06200	[]	2.7.3.9-RXN	MNXR115211	[]	new reaction
821	r_0830	SBO:0000176	S-adenosyl-L-methionine:2-polyprenyl-6-hydroxyphenol 6-O-methyltransferase;	2po6hy[c] + amet[c] <=> 2po6me[c] + ahcys[c]	TRUE	AB395_RS13685	-1000	1000	Ubiquinone and other terpenoid-quinone biosynthesis	2.1.1.222	R08769	rxn14029	[]	RXN-12160	MNXR117385	31414	new reaction
822	r_0831	SBO:0000176	S-adenosyl-L-methionine:3-demethylubiquinol 3-O-methyltransferase	amet[c] + 3detlbq[c] <=> ahcys[c] + qh2[c]	TRUE	AB395_RS13685	-1000	1000	[]	2.1.1.64	R12657	[]	[]	[]	[]	[]	new reaction
823	r_0832	SBO:0000176	D-Glucosamine 1-phosphate 1,6-phosphomutase;	gam1p[c] <=> gam6p[c]	TRUE	AB395_RS14880	-1000	1000	Amino sugar and nucleotide sugar metabolism	5.4.2.10	R02060	rxn01485	PGAMT	5.4.2.10-RXN	MNXR102526	23427	new reaction
824	r_0833	SBO:0000176	(deoxyribonucleotide)n:5'-phospho-(deoxyribonucleotide)m ligase (AMP-forming)	atp[c] + dna[c] + 5pdna[c] -> amp[c] + ppi[c] + dna[c]	FALSE	AB395_RS14930 or AB395_RS15870 or AB395_RS21935 or AB395_RS26610	0	1000	[]	6.5.1.1	R00381	rxn15042	[]	DNA-LIGASE-ATP-RXN	MNXR115853	[]	new reaction
825	r_0834	SBO:0000176	1,4-alpha-D-Glucan:1,4-alpha-D-glucan 6-alpha-D-(1,4-alpha-D-glucano)-transferase	amylose[c] <=> starch[c]	TRUE	AB395_RS15510	-1000	1000	Starch and sucrose metabolism	2.4.1.18	R02110	rxn06095	[]	RXN-7710	MNXR122009	[]	new reaction
826	r_0835	SBO:0000176	D-ornithine carboxy-lyase	orn__D[c] <=> ptrc[c] + co2[c]	TRUE	AB395_RS15690	-1000	1000	[]	4.1.1.116	R12304	[]	[]	[]	[]	[]	new reaction
827	r_0836	SBO:0000176	D-lysine carboxy-lyase	lys__D[c] <=> 15dap[c] + co2[c]	TRUE	AB395_RS15690	-1000	1000	[]	4.1.1.116	R12305	[]	[]	[]	[]	[]	new reaction
828	r_0837	SBO:0000176	alpha-D-xylopyranose aldose-ketose-isomerase	xyl__D[c] <=> xylulo_D[c]	TRUE	AB395_RS15790	-1000	1000	[]	5.3.1.5	R12986	[]	[]	[]	[]	[]	new reaction
829	r_0838	SBO:0000176	ATP:D-xylulose 5-phosphotransferase	atp[c] + xylu__D[c] -> adp[c] + xu5p__D[c]	FALSE	AB395_RS15795	0	1000	Pentose and glucuronate interconversions	2.7.1.17	R01639	rxn01199	XKS1; XYLK	XYLULOKIN-RXN	MNXR105255	10965	new reaction
830	r_0839	SBO:0000176	cobalt-precorrin-6B:NAD+ oxidoreductase	copre6[c] + nadh[c] + h[c] -> codhpre6[c] + nad[c]	FALSE	AB395_RS15920	0	1000	Porphyrin Metabolism	1.3.1.106	R05812	rxn04050	COPREC6R; CPC6R	RXN-8765	MNXR122472	15627	new reaction
831	r_0840	SBO:0000176	S-adenosyl-L-methionine:precorrin-4 C20-methyltransferase	amet[c] + dscl[c] <=> ahcys[c] + pre3a[c] + h[c]	TRUE	AB395_RS15930	-1000	1000	Porphyrin and Chlorophyll Metabolism	2.1.1.130	R03948	rxn02775	PC20M	2.1.1.130-RXN	MNXR102394	16841	new reaction
832	r_0841	SBO:0000176	precorrin 8X 11,12-methylmutase	pre8[c] <=> hgbyr[c]	TRUE	AB395_RS15935	-1000	1000	Porphyrin and Chlorophyll Metabolism	5.4.99.61	R05177	rxn03512	PC8XM	5.4.1.2-RXN	MNXR138689	22515	new reaction
833	r_0842	SBO:0000176	4-Maleylacetoacetate cis-trans-isomerase	4mlacac[c] <=> 4fumacac[c]	TRUE	AB395_RS16020	-1000	1000	Tyrosine metabolism	5.2.1.2	R03181	rxn02276	MACACI; MLACI; U59	MALEYLACETOACETATE-ISOMERASE-RXN	MNXR101325	14818	new reaction
834	r_0843	SBO:0000176	Homogentisate:oxygen 1,2-oxidoreductase (decyclizing)	hgentis[c] + o2[c] <=> 4mlacac[c]	TRUE	AB395_RS16030	-1000	1000	Tyrosine metabolism	1.13.11.5	R02519	rxn01825	HGENDO; HGNTOR; U58	HOMOGENTISATE-12-DIOXYGENASE-RXN	MNXR100628	15450	new reaction
835	r_0844	SBO:0000176	4-Hydroxyphenylpyruvate:oxygen oxidoreductase (hydroxylating,decarboxylating)	34hpp[c] + o2[c] <=> hgentis[c] + co2[c]	TRUE	AB395_RS16045	-1000	1000	Tyrosine metabolism	1.13.11.27	R02521	rxn01827	34HPPOR; HPPDO1; U57	4-HYDROXYPHENYLPYRUVATE-DIOXYGENASE-RXN	MNXR94843	16190	new reaction
836	r_0845	SBO:0000176	D-mannose-6-phosphate aldose-ketose-isomerase	man6p[c] <=> f6p[c]	TRUE	AB395_RS16445 or AB395_RS31350	-1000	1000	[]	5.3.1.8	R00772	rxn00559	MAN6PI; PMI40	MANNPISOM-RXN	MNXR101382	12359	new reaction
837	r_0846	SBO:0000176	sn-glycerol 3-phosphate:quinone oxidoreductase	sng3p[c] + qun[c] -> dhap[c] + hqn[c]	FALSE	AB395_RS16665 or AB395_RS23545	0	1000	[]	1.1.5.3	R00849	rxn14229	[]	[]	[]	[]	new reaction
838	r_0847	SBO:0000176	L-methionine:thioredoxin-disulfide S-oxidoreductase	met__L[c] + trdox[c] + h2o[c] <=> metox[c] + trdrd[c]	TRUE	AB395_RS16875 or AB395_RS19030 or AB395_RS25925 or AB395_RS33655	-1000	1000	[]	1.8.4.11	R07606	rxn07437	[]	1.8.4.13-RXN	MNXR139547	19995	new reaction
839	r_0848	SBO:0000176	peptide-L-methionine:thioredoxin-disulfide S-oxidoreductase [L-methionine (S)-S-oxide-forming]	pep_met__L[c] + trdox[c] + h2o[c] <=> pepmetox[c] + trdrd[c]	TRUE	AB395_RS16875 or AB395_RS19030 or AB395_RS25925 or AB395_RS33655	-1000	1000	[]	1.8.4.11	R04120	rxn06595	[]	RXN-8668	MNXR122419	14219	new reaction
840	r_0849	SBO:0000176	sn-Glycerol-3-phosphate:NADP+ 2-oxidoreductase	sng3p[c] + nadp[c] -> dhap[c] + nadph[c] + h[c]	FALSE	AB395_RS17250	0	1000	Glycerophospholipid metabolism	1.1.1.94	R00844	rxn00612	G3PD2	GLYC3PDEHYDROGBIOSYN-RXN	MNXR115935	11094	new reaction
841	r_0850	SBO:0000176	sn-Glycerol-3-phosphate:NAD+ 2-oxidoreductase	sng3p[c] + nad[c] -> dhap[c] + nadh[c] + h[c]	FALSE	AB395_RS17250	0	1000	Glycerophospholipid metabolism	1.1.1.94	R00842	rxn00611	G3PD1; G3PD1ir; G3PD1irm; GPD1; GPD2	1.1.1.8-RXN	MNXR99876	[]	new reaction
842	r_0851	SBO:0000176	S-adenosyl-L-methionine:tRNA guanine N1-methyltransferase;	amet[c] + trnagua[c] <=> ahcys[c] + trnan1megu[c]	TRUE	AB395_RS17290	-1000	1000	[]	2.1.1.228	R00597	rxn11548	[]	RXN-12458	MNXR117570	36900	new reaction
843	r_0852	SBO:0000185		atp[c] + h2o[c] + hemeO[c] -> adp[c] + pi[c] + hemeO[e]	FALSE	AB395_RS17370	0	1000	[]	7.6.2.5	[]	[]	[]	[]	[]	[]	new reaction
844	r_0853	SBO:0000176	Protein-tyrosine-phosphate phosphohydrolase	ptyp[c] + h2o[c] <=> pty[c] + pi[c]	TRUE	AB395_RS17420	-1000	1000	[]	3.1.3.48	R02585	rxn06182	[]	PROTEIN-TYROSINE-PHOSPHATASE-RXN	MNXR107596	10685	new reaction
845	r_0854	SBO:0000176	4a-hydroxytetrahydrobiopterin hydro-lyase	hthbp[c] <=> dhbpt[c] + h2o[c]	TRUE	AB395_RS17425	-1000	1000	[]	4.2.1.96	R04734	rxn03236	4AHD2	[]	[]	[]	new reaction
846	r_0855	SBO:0000176	Catechol:oxygen 1,2-oxidoreductase(decyclizing)	catechol[c] + o2[c] <=> ccmuac[c]	TRUE	AB395_RS18390	-1000	1000	Benzoate degradation	1.13.11.1	R00817	rxn00588	CATA; CATDOX	CATECHOL-12-DIOXYGENASE-RXN	MNXR96458	23853	new reaction
847	r_0856	SBO:0000176	benzoate,NADH:oxygen oxidoreductase (1,2-hydroxylating)	bz[c] + nadh[c] + h[c] + o2[c] -> bz12diol[c] + nad[c]	FALSE	AB395_RS18400	0	1000	[]	1.14.12.10	R07188	rxn04969	[]	[]	[]	[]	new reaction
848	r_0857	SBO:0000176	4-carboxymethylbut-3-en-4-olide enol-lactonohydrolase	5odhf2a[c] + h2o[c] <=> 3oxoadp[c]	TRUE	AB395_RS18420 or AB395_RS21535	-1000	1000	Benzoate degradation	3.1.1.24	R02991	rxn02144	OXOAEL; PCAD	3-OXOADIPATE-ENOL-LACTONASE-RXN	MNXR102247	10185	new reaction
849	r_0858	SBO:0000176	glycerone-phosphate phosphate-lyase (methylglyoxal-forming)	dhap[c] <=> mthgxl[c] + pi[c]	TRUE	AB395_RS18780	-1000	1000	Propanoate metabolism	4.2.3.3	R01016	rxn00748	MGSA	METHGLYSYN-RXN	MNXR101551	17938	new reaction
850	r_0859	SBO:0000176	2,3,4,5-tetrahydrodipicolinate:NAD+ 4-oxidoreductase	4hthdp[c] + nadh[c] + h[c] <=> thdp[c] + nad[c]	TRUE	AB395_RS18795	-1000	1000	Lysine Biosynthesis	1.17.1.8 or 1.3.1.26	R04198	rxn02928	[]	[]	[]	[]	new reaction
851	r_0860	SBO:0000176	(R)-lactate hydro-lyase (adding N-acetyl-D-glucosamine 6-phosphate; N-acetylmuramate 6-phosphate-forming)	lac__D[c] + acgam6p[c] <=> acmum6p[c] + h2o[c]	TRUE	AB395_RS18975	-1000	1000	Amino sugar and nucleotide sugar metabolism	4.2.1.126	R08555	rxn08044	ACM6PH	RXN0-4641	MNXR123182	26413	new reaction
852	r_0861	SBO:0000176	N-Acetyl-D-glucosamine-6-phosphate amidohydrolase	acgam6p[c] + h2o[c] <=> gam6p[c] + ac[c]	TRUE	AB395_RS18995	-1000	1000	Amino sugar and nucleotide sugar metabolism	3.5.1.25	R02059	rxn01484	AGDC; AGDC_r	NAG6PDEACET-RXN	MNXR95528	22937	new reaction
853	r_0862	SBO:0000176	Monocarboxylic acid amide amidohydrolase	moaciami[c] + h2o[c] <=> carbo[c] + nh3[c]	TRUE	AB395_RS19010	-1000	1000	[]	3.5.1.4	R03909	rxn06522	[]	AMIDASE-RXN	MNXR108518	[]	new reaction
854	r_0863	SBO:0000176	phosphoenolpyruvate:glycerone phosphotransferase	pep[c] + dha[c] <=> pyr[c] + dhap[c]	TRUE	AB395_RS19125 and AB395_RS19135 and AB395_RS19155	-1000	1000	[]	2.7.1.121	R01012	rxn00745	DHAPT	2.7.1.121-RXN	MNXR97364	18382	new reaction
855	r_0864	SBO:0000176	CTP:3-deoxy-D-manno-octulosonate cytidylyltransferase	ctp[c] + kdo[c] <=> ppi[c] + ckdo[c]	TRUE	AB395_RS19385	-1000	1000	Lipopolysaccharide biosynthesis	2.7.7.38	R03351	rxn02405	DMOCT; KDOCT; KDOCT2	CPM-KDOSYNTH-RXN	MNXR100932	23449	new reaction
856	r_0865	SBO:0000176	queuosine34 in tRNA:acceptor oxidoreductase	trnaque[c] + acptr[c] + h2o[c] <=> epqtrna[c] + racptr[c]	TRUE	AB395_RS19985	-1000	1000	[]	1.17.99.6	R12500	[]	[]	[]	[]	[]	new reaction
857	r_0866	SBO:0000176	undecaprenyl-diphosphate phosphohydrolase	dtpcudcpp[c] + h2o[c] <=> dtpcudcpp[c] + pi[c] + h[c]	TRUE	AB395_RS19995	-1000	1000	Peptidoglycan biosynthesis	3.6.1.27	R05627	rxn03901	UDCPDP	UNDECAPRENYL-DIPHOSPHATASE-RXN	MNXR109723	28095	new reaction
858	r_0867	SBO:0000176	S-adenosyl-L-methione:demethylmenaquinol methyltransferase	dmmq[c] + amet[c] <=> mql[c] + ahcys[c]	TRUE	AB395_RS20245	-1000	1000	[]	2.1.1.163	R09736	rxn16584	[]	RXN-11046	MNXR139728	26466	new reaction
859	r_0868	SBO:0000176	S-adenosyl-L-methionine:2-methoxy-6-all-trans-polyprenyl-1,4-benzoquinol 5-C-methyltransferase	amet[c] + 2m6atp14b[c] <=> ahcys[c] + 6m3m2atp14b[c]	TRUE	AB395_RS20245	-1000	1000	[]	2.1.1.201	R09737	rxn16585	[]	RXN-11754	MNXR117138	28287	new reaction
860	r_0869	SBO:0000176	GTP:alpha-D-mannose-1-phosphate guanylyltransferase	gtp[c] + man1p[c] <=> ppi[c] + gdpmann[c]	TRUE	AB395_RS31350	-1000	1000	Amino sugar and nucleotide sugar metabolism	2.7.7.13	R00885	rxn00641	MAN1PT; PSA1	[]	[]	[]	new reaction
861	r_0870	SBO:0000176	GDP-alpha-D-mannose 4,6-hydro-lyase (GDP-4-dehydro-alpha-D-rhamnose-forming);	gdpmann[c] <=> gdpddman[c] + h2o[c]	TRUE	AB395_RS31365	-1000	1000	Amino sugar and nucleotide sugar metabolism	4.2.1.47	R00888	rxn00642	GDPMD; GMAND	GDPMANDEHYDRA-RXN	MNXR100377	23821	new reaction
862	r_0871	SBO:0000185		atp[c] + h2o[c] + k[c] -> adp[c] + pi[c] + k[e]	FALSE	AB395_RS31375 and AB395_RS25305 and AB395_RS25310 and AB395_RS25315 and AB395_RS25320	0	1000	[]	7.2.2.6	[]	[]	[]	[]	[]	[]	new reaction
863	r_0872	SBO:0000176	farnesyl-diphosphate:farnesyl-diphosphate farnesyltransferase	2 frdp[c] <=> ppi[c] + HC01118[c]	TRUE	AB395_RS31385 or AB395_RS31390	-1000	1000	Sesquiterpenoid and triterpenoid biosynthesis	2.5.1.21 or 2.5.1.103	R00702	rxn00498	ERG9_1	RXN-12263	MNXR103264	[]	new reaction
864	r_0873	SBO:0000176	squalene:FAD oxidoreductase (hydroxylating)	sql[c] + fad[c] + h2o[c] <=> hdsl[c] + fadh2[c]	TRUE	AB395_RS31395	-1000	1000	[]	1.17.8.1	R11401	[]	[]	RXN-17128	MNXR114698	49090	new reaction
865	r_0874	SBO:0000176	squalene mutase (cyclizing)	sql[c] <=> dptne[c]	TRUE	AB395_RS31400	-1000	1000	Sesquiterpenoid and triterpenoid biosynthesis	5.4.99.17	R07322	rxn05070	[]	5.4.99.17-RXN	MNXR104526	17638	new reaction
866	r_0875	SBO:0000176	arsenate:thioredoxin oxidoreductase	arsni[c] + trdrd[c] <=> aso3[c] + trdox[c] + h2o[c]	TRUE	AB395_RS21185	-1000	1000	[]	1.20.4.4	R10927	[]	[]	RXN-10737	MNXR96114	[]	new reaction
867	r_0876	SBO:0000176	glutharedoxin:arsenate oxidoreductase	arsni[c] + glutrd[c] <=> aso3[c] + flutox[c]	TRUE	AB395_RS21195	-1000	1000	[]	1.20.4.1	R05747	rxn06961	[]	RXN-982	MNXR123006	[]	new reaction
868	r_0877	SBO:0000176	succinyl-CoA:acetyl-CoA C-acyltransferase;	succoa[c] + accoa[c] <=> coa[c] + oxadpcoa[c]	TRUE	AB395_RS21365	-1000	1000	Benzoate degradation	2.3.1.174	R00829	rxn00598	3OXACOA; 3OXCOAT	RXN-3641	MNXR94967	19483	new reaction
869	r_0878	SBO:0000176	4-Carboxymuconolactone carboxy-lyase	4cml[c] <=> 5odhf2a[c] + co2[c]	TRUE	AB395_RS21540	-1000	1000	Benzoate degradation	4.1.1.44	R03470	rxn02483	4CMLCL-kt; CMLDC; PCAC	4-CARBOXYMUCONOLACTONE-DECARBOXYLASE-RXN	MNXR115592	23349	new reaction
870	r_0879	SBO:0000176	Protocatechuate:oxygen 3,4-oxidoreductase (decyclizing)	34dhbz[c] + o2[c] <=> CCbuttc[c]	TRUE	AB395_RS21545 and AB395_RS21550	-1000	1000	Benzoate degradation	1.13.11.3	R01631	rxn01192	PCADYOX; PCAHG	PROTOCATECHUATE-34-DIOXYGENASE-RXN	MNXR102399	10085	new reaction
871	r_0880	SBO:0000176	2-Carboxy-2,5-dihydro-5-oxofuran-2-acetate lyase (decyclizing)	4cml[c] <=> CCbuttc[c]	TRUE	AB395_RS21555	-1000	1000	Benzoate degradation	5.5.1.2	R03307	rxn02369	MUCCY-kt; PCAB	5.5.1.2-RXN	MNXR115630	23658	new reaction
872	r_0881	SBO:0000176	3-Hydroxy-2-methylpropanoate:NAD+ oxidoreductase	3hmp[c] + nad[c] -> 2mop[c] + nadh[c] + h[c]	FALSE	AB395_RS21735	0	1000	[]	1.1.1.31	R02047	rxn01480	HIBD; HIBDkt	3-HYDROXYISOBUTYRATE-DEHYDROGENASE-RXN	MNXR100663	17682	new reaction
873	r_0882	SBO:0000176	4-hydroxy-2-oxo-heptandioate succinate-semialdehyde-lyase (pyruvate-forming)	4h2kpi[c] <=> sucsal[c] + pyr[c]	TRUE	AB395_RS22080	-1000	1000	[]	4.1.2.52	R01645	rxn01202	[]	4-HYDROXY-2-KETOPIMELATE-LYSIS-RXN	MNXR115593	25789	new reaction
874	r_0883	SBO:0000176	3,4-Dihydroxyphenylacetate:oxygen 2,3-oxidoreductase (decyclizing)	34dhpacet[c] + o2[c] <=> 5cmhmsa[c]	TRUE	AB395_RS22100	-1000	1000	Tyrosine metabolism	1.13.11.15	R03303	rxn02366	DHPDO; HMPCCDO; R03303	1.13.11.15-RXN	MNXR94835	15634	new reaction
875	r_0884	SBO:0000176	D-mannonate hydro-lyase	mana[c] <=> 2ddglcn[c] + h2o[c]	TRUE	AB395_RS22405 or AB395_RS23845	-1000	1000	Pentose and glucuronate interconversions	4.2.1.8	R05606	rxn03885	MNNH	MANNONDEHYDRAT-RXN	MNXR138624	20098	new reaction
876	r_0885	SBO:0000176	ATP:[protein]-L-tyrosine O-phosphotransferase	atp[c] + pty[c] -> adp[c] + ptyp[c] + e[c]	FALSE	AB395_RS23060	0	1000	[]	2.7.10.2	R02584	rxn06181	[]	2.7.10.1-RXN	MNXR107595	10597	new reaction
877	r_0886	SBO:0000176	UTP:alpha-D-glucose-1-phosphate uridylyltransferase	utp[c] + g1p[c] <=> ppi[c] + udpg[c]	TRUE	AB395_RS23065	-1000	1000	Pentose and glucuronate interconversions	2.7.7.9	R00289	rxn00213	GALU; GALUi; UGP1; YHL012W	GLUC1PURIDYLTRANS-RXN	MNXR143121	19892	new reaction
878	r_0887	SBO:0000176	5-Dehydro-4-deoxy-D-glucuronate ketol-isomerase	5dh4dglcn[c] <=> 46dh25dohxn[c]	TRUE	AB395_RS23435	-1000	1000	Pentose and glucuronate interconversions	5.3.1.17	R04383	rxn03043	DKI; KDUI	5.3.1.17-RXN	MNXR108856	23899	new reaction
879	r_0888	SBO:0000176	2-Dehydro-3-deoxy-D-gluconate:NAD+ 5-oxidoreductase	2ddglcn[c] + nad[c] -> 46dh25dohxn[c] + nadh[c] + h[c]	FALSE	AB395_RS23440	0	1000	Pentose and glucuronate interconversions	1.1.1.127	R01542	rxn01124	DGLCND; DKII	1.1.1.127-RXN	MNXR139051	24235	new reaction
880	r_0889	SBO:0000176	UDP-N-acetylglucosamine hydro-lyase (inverting; UDP-2-acetamido-2,6-dideoxy-beta-L-arabino-hexos-4-ulose-forming)	uacgam[c] <=> udp2aca26ddarah4[c] + h2o[c]	TRUE	AB395_RS24690	-1000	1000	Amino sugar and nucleotide sugar metabolism	4.2.1.115	R09697	rxn16543	[]	RXN-9998	MNXR113110	26112	new reaction
881	r_0890	SBO:0000176	phosphoenolpyruvate:2,4-bis(acetylamino)-2,4,6-trideoxy-beta-L-altropyranose transferase (phosphate-hydrolysing, 2,7-acetylamino-transfering, 2-carboxy-2-oxoethyl-forming)	24b246tbap[c] + pep[c] + h2o[c] <=> psea[c] + pi[c]	TRUE	AB395_RS24695	-1000	1000	Amino sugar and nucleotide sugar metabolism	2.5.1.97	R09841	rxn16682	[]	RXN-10002	MNXR113242	31634	new reaction
882	r_0891	SBO:0000176	acetyl-CoA:UDP-4-amino-4,6-dideoxy-N-acetyl-beta-L-altrosamine 4-N-acetyltransferase	u4a46dnabla[c] + accoa[c] <=> u24b246tbla[c] + coa[c]	TRUE	AB395_RS24700	-1000	1000	Amino sugar and nucleotide sugar metabolism	2.3.1.202	R09842	rxn16683	[]	RXN-10000	MNXR113243	34156	new reaction
883	r_0892	SBO:0000176	CTP:pseudaminate cytidylyltransferase	psea[c] + ctp[c] <=> cmppsea[c] + ppi[c]	TRUE	AB395_RS24710	-1000	1000	Amino sugar and nucleotide sugar metabolism	2.7.7.81	R09843	rxn16684	[]	RXN-10003	MNXR113244	32086	new reaction
884	r_0893	SBO:0000176	UDP-4-amino-4,6-dideoxy-N-acetyl-beta-L-altrosamine:2-oxoglutarate aminotransferase	u4a46dnabla[c] + akg[c] <=> udp2aca26ddarah4[c] + glu__L[c]	TRUE	AB395_RS24715	-1000	1000	Amino sugar and nucleotide sugar metabolism	2.6.1.92	R09825	rxn16666	[]	RXN-9999	MNXR113228	31770	new reaction
885	r_0894	SBO:0000176	alpha-D-ribose-1-methylphosphonate-5-triphosphate diphosphohydrolase	rpntp[c] + h2o[c] <=> prpmn[c] + ppi[c]	TRUE	AB395_RS24890	-1000	1000	Phosphonate and phosphinate metabolism	3.6.1.63	R10186	rxn26457	[]	RXN0-6733	MNXR113551	34684	new reaction
886	r_0895	SBO:0000176	donor:hydrogen-peroxide oxidoreductase	racptr[c] + h2o2[c] <=> acptr[c] + 2 h2o[c]	TRUE	AB395_RS25255	-1000	1000	[]	1.11.1.21	R03532	rxn06406	[]	RXN-8667	MNXR122418	30276	new reaction
887	r_0896	SBO:0000176	6-(2-Amino-2-carboxyethyl)-7,8-dioxo-7,8-dihydroquinoline-2,4-dicarboxylate:oxygen oxidoreductase (cyclizing)	1pqq[c] + 3 o2[c] <=> pqq[c] + 2 h2o2[c] + 2 h2o[c]	TRUE	AB395_RS25655 or AB395_RS27940	-1000	1000	[]	1.3.3.11	R07353	rxn11680	[]	RXN-11181	MNXR111016	10692	new reaction
888	r_0897	SBO:0000176	ATP:D-ribulose-5-phosphate 1-phosphotransferase	atp[c] + ru5p__D[c] -> adp[c] + rb15bp[c]	FALSE	AB395_RS25680	0	1000	Carbon metabolism	2.7.1.19	R01523	rxn01111	PRKIN	PHOSPHORIBULOKINASE-RXN	MNXR103217	19368	new reaction
889	r_0898	SBO:0000185		atp[c] + h2o[c] + mg2[c] -> adp[c] + pi[c] + mg2[e] + h[c]	FALSE	AB395_RS32740	0	1000	[]	7.2.2.14	[]	[]	[]	[]	[]	[]	new reaction
890	r_0901	SBO:0000176	gapfilling	fmn[c] + nadh[c] + h[c] <=> fmnh2[c] + nad[c]	TRUE	[]	-1000	1000	Riboflavin Metabolism	1.5.1.36	R05705	rxn03974	FMNRx	RXN-9510	[]	[]	new reaction
891	r_0902	SBO:0000632	gapfilling	pl[c] <=>	TRUE	[]	-1000	1000	Transport	[]	[]	[]	[]	[]	[]	[]	new reaction
892	r_0903	SBO:0000632	gapfilling	thbpt[c] <=>	TRUE	[]	-1000	1000	Transport	[]	[]	[]	[]	[]	[]	[]	new reaction
893	r_0904	SBO:0000176	gapfilling	pphn[c] + nad[c] <=> 34hpp[c] + co2[c] + nadh[c] + h[c]	TRUE	[]	-1000	1000	Phenylalanine Tyrosine Tryptophan Biosynthesis	1.3.1.12	R01728	rxn01268	PPND	PREPHENATEDEHYDROG-RXN	[]	[]	new reaction
894	r_0905	SBO:0000176	gapfilling	oaa[c] + Largn[c] <=> asp__L[c] + pphn[c]	TRUE	[]	-1000	1000	Phenylalanine Tyrosine Tryptophan Biosynthesis	2.6.1.57	R01731	rxn01270	[]	PREPHENATE-ASP-TRANSAMINE-RXN	[]	[]	new reaction
895	r_0906	SBO:0000176	gapfilling	pre6b[c] + nadp[c] <=> pre6a[c] + nadph[c] + h[c]	TRUE	[]	-1000	1000	Porphyrin and Chlorophyll Metabolism	1.3.1.54	R05150	rxn03492	PC6AR	1.3.1.54-RXN	[]	[]	new reaction
896	r_0907	SBO:0000176	gapfilling	2 amet[c] + pre6b[c] <=> 2 ahcys[c] + pre8[c] + co2[c]	TRUE	[]	-1000	1000	Porphyrin and Chlorophyll Metabolism	2.1.1.132	R05149	rxn03491	PC6YM	2.1.1.132-RXN	[]	[]	new reaction
897	r_0908	SBO:0000176	gapfilling	hgbyr[c] + 2 gln__L[c] + 2 atp[c] + 2 h2o[c] <=> hgbam[c] + 2 pi[c] + 2 glu__L[c] + 2 adp[c]	TRUE	[]	-1000	1000	Porphyrin and Chlorophyll Metabolism	6.3.5.9	R05224	rxn06887	COBB	R341-RXN	[]	[]	new reaction
898	r_0909	SBO:0000632	gapfilling	cobalt2[c] <=>	TRUE	[]	-1000	1000	Transport	[]	[]	[]	[]	[]	[]	[]	new reaction
899	r_0910	SBO:0000628	gapfilling	cob2nda[c] ->	FALSE	[]	0	1000	Transport	[]	[]	[]	[]	[]	[]	[]	new reaction
900	r_0911	SBO:0000176	gapfilling	4adcho[c] <=> 4abz[c] + pyr[c]	TRUE	[]	-1000	1000	Folate Biosynthesis	4.1.3.38	R05553	rxn03841	U88	ADCLY-RXN	[]	[]	new reaction
901	r_0912	SBO:0000628	gapfilling	cpmp[c] ->	FALSE	[]	0	1000	Transport	[]	[]	[]	[]	[]	[]	[]	new reaction
902	r_0913	SBO:0000628	gapfilling	preq1[c] ->	FALSE	[]	0	1000	Transport	[]	[]	[]	[]	[]	[]	[]	new reaction
903	r_0914	SBO:0000176	gapfilling	u24b246tbla[c] + h2o[c] <=> 24b246tbap[c] + udp[c]	TRUE	[]	-1000	1000	Amino sugar and nucleotide sugar metabolism	3.6.1.57	R09834	rxn16675	[]	[]	[]	[]	new reaction
904	r_0915	SBO:0000628	gapfilling	cmppsea[c] ->	FALSE	[]	0	1000	Transport	[]	[]	[]	[]	[]	[]	[]	new reaction
905	r_0916	SBO:0000628	gapfilling	uamr[c] ->	FALSE	[]	0	1000	Transport	[]	[]	[]	[]	[]	[]	[]	new reaction
906	r_0917	SBO:0000176	gapfilling	accoa[c] + gam1p[c] <=> coa[c] + acgam1p[c]	TRUE	[]	-1000	1000	Amino sugar and nucleotide sugar metabolism	2.3.1.157	R05332	rxn03638	G1PACTr	2.3.1.157-RXN	[]	[]	new reaction
907	r_0918	SBO:0000176	gapfilling	atp[c] + acgam[c] <=> adp[c] + acgam6p[c]	TRUE	[]	-1000	1000	Amino sugar and nucleotide sugar metabolism	2.7.1.59	R01201	rxn00892	ACGAMK	N-ACETYLGLUCOSAMINE-KINASE-RXN	[]	[]	new reaction
908	r_0919	SBO:0000628	gapfilling	chitob[c] ->	TRUE	[]	0	1000	Transport	[]	[]	[]	[]	[]	[]	[]	new reaction
909	r_0921	SBO:0000176	gapfilling	cys__L[c] + so3[c] <=> h2s[c] + Lcyst[c]	TRUE	[]	-1000	1000	Cysteine and Methionine Metabolism	4.4.1.10	R00901	rxn00651	[]	CYSTEINE-LYASE-RXN	[]	[]	new reaction
910	r_0922	SBO:0000176	gapfilling	3sulac[c] <=> pyr[c] + hso3[c]	TRUE	[]	-1000	1000	Cysteine and Methionine Metabolism	4.4.1.24	R07633	rxn07449	[]	[]	[]	[]	new reaction
911	r_0923	SBO:0000176	gapfilling	Lcyst[c] + h2o[c] <=> pyr[c] + hso3[c] + nh3[c] + h[c]	TRUE	[]	-1000	1000	Cysteine and Methionine Metabolism	4.4.1.25	R07634	rxn07450	[]	4.4.1.25-RXN	[]	[]	new reaction
912	r_0924	SBO:0000628	gapfilling	glu[c] ->	FALSE	[]	0	1000	Transport	[]	[]	[]	[]	[]	[]	[]	new reaction
913	r_0925	SBO:0000628	gapfilling	dms[c] ->	FALSE	[]	0	1000	Transport	[]	[]	[]	[]	[]	[]	[]	new reaction
914	r_0926	SBO:0000628	gapfilling	nalhsrln[c] ->	FALSE	[]	0	1000	Transport	[]	[]	[]	[]	[]	[]	[]	new reaction
915	r_0927	SBO:0000628	gapfilling	5mtr[c] ->	FALSE	[]	0	1000	Transport	[]	[]	[]	[]	[]	[]	[]	new reaction
916	r_0928	SBO:0000628	gapfilling	5a4icam[c] ->	FALSE	[]	0	1000	Transport	[]	[]	[]	[]	[]	[]	[]	new reaction
917	r_0929	SBO:0000176	gapfilling	dgtp[c] <=> dna[c]	TRUE	[]	-1000	1000	Purine Metabolism	[]	[]	[]	[]	[]	[]	[]	new reaction
918	r_0930	SBO:0000176	gapfilling	dztp[c] <=> dna[c]	TRUE	[]	-1000	1000	Purine Metabolism	[]	[]	[]	[]	[]	[]	[]	new reaction
919	r_0931	SBO:0000176	gapfilling	atp[c] + dgmp[c] + asp__L[c] <=> adp[c] + pi[c] + dsmp[c]	TRUE	[]	-1000	1000	Purine Metabolism	[]	R12786	[]	[]	[]	[]	[]	new reaction
920	r_0932	SBO:0000176	gapfilling	urate[c] + o2[c] + h2o[c] <=> 5hiu[c] + h2o2[c]	TRUE	[]	-1000	1000	Purine Metabolism	[]	R02106	rxn01523	[]	URATE-OXIDASE-RXN	[]	[]	new reaction
921	r_0934	SBO:0000176	gapfilling	alla[c] + h2o[c] <=> urdgci[c] + nh3[c] + co2[c]	TRUE	[]	-1000	1000	Purine Metabolism	[]	R02423	rxn01747	[]	ALLANTOATE-DEIMINASE-RXN	[]	[]	new reaction
922	r_0935	SBO:0000628	gapfilling	dmgly[c] ->	FALSE	[]	0	1000	Transport	[]	[]	[]	[]	[]	[]	[]	new reaction
923	r_0936	SBO:0000176	gapfilling	dhlpyprot[c] + nad[c] <=> lprot[c] + nadh[c] + h[c]	TRUE	[]	-1000	1000	Glycine, Serine, and Threonine Metabolism	[]	R03815	rxn06493	GCCcm	[]	[]	[]	new reaction
924	r_0937	SBO:0000176	gapfilling	athr__L[c] + nadp[c] -> 2aobut[c] + nadph[c] + h[c]	FALSE	[]	0	1000	Glycine, Serine, and Threonine Metabolism	[]	R10851	[]	[]	[]	[]	[]	new reaction
925	r_0938	SBO:0000628	gapfilling	24dab[c] ->	FALSE	[]	0	1000	Transport	[]	[]	[]	[]	[]	[]	[]	new reaction
926	r_0939	SBO:0000176	gapfilling	glu__L[c] + aspsa[c] <=> akg[c] + 24dab[c]	TRUE	[]	-1000	1000	Glycine, Serine, and Threonine Metabolism	[]	R06977	rxn04786	DABAAT	R101-RXN	[]	[]	new reaction
927	r_0940	SBO:0000632	gapfilling	ecto__L[c] <=>	TRUE	[]	-1000	1000	Transport	[]	[]	[]	[]	[]	[]	[]	new reaction
928	r_0941	SBO:0000628	gapfilling	ptcys[c] ->	FALSE	[]	0	1000	Transport	[]	[]	[]	[]	[]	[]	[]	new reaction
929	r_0942	SBO:0000628	gapfilling	pap[c] ->	FALSE	[]	0	1000	Transport	[]	[]	[]	[]	[]	[]	[]	new reaction
930	r_0943	SBO:0000176	gapfilling	atp[c] + pnto__R[c] <=> adp[c] + 4ppan[c]	TRUE	[]	-1000	1000	Pantothenate and CoA Biosynthesis	2.7.1.33	R03018	rxn12510	YDR531W	PANTOTHENATE-KIN-RXN	[]	[]	new reaction
931	r_0944	SBO:0000176	gapfilling	uri[c] + pi[c] + h[c] <=> ura[c] + r1p[c]	TRUE	[]	-1000	1000	Pyrimidine Metabolism	[]	R01876	rxn01366	U22	URPHOS-RXN	[]	[]	new reaction
932	r_0945	SBO:0000632	gapfilling	5mcsn[c] <=>	TRUE	[]	-3	1000	Transport	[]	[]	[]	[]	[]	[]	[]	new reaction
933	r_0946	SBO:0000628	gapfilling	3aib__D[c] ->	FALSE	[]	0	1000	Transport	[]	[]	[]	[]	[]	[]	[]	new reaction
934	r_0947	SBO:0000628	gapfilling	scp[c] ->	FALSE	[]	0	1000	Transport	[]	[]	[]	[]	[]	[]	[]	new reaction
935	r_0948	SBO:0000176	gapfilling	2c4mthzep[c] <=> cthzp[c]	TRUE	[]	-1000	1000	Thiamine Metabolism	[]	R09977	rxn16823	[]	RXN-12609	[]	[]	new reaction
936	r_0949	SBO:0000628	gapfilling	4hba[c] ->	FALSE	[]	0	1000	Transport	[]	[]	[]	[]	[]	[]	[]	new reaction
937	r_0950	SBO:0000628	gapfilling	thmtp[c] ->	FALSE	[]	0	1000	Transport	[]	[]	[]	[]	[]	[]	[]	new reaction
938	r_0951	SBO:0000176	gapfilling	15gl[c] + h2o[c] + h[c] <=> glcn[c]	TRUE	[]	-1000	1000	Pentose phosphate pathway	3.1.1.17	R01519	rxn01107	[]	GLUCONOLACT-RXN	[]	[]	new reaction
939	r_0952	SBO:0000628	gapfilling	fe3[c] ->	FALSE	[]	0	1000	Transport	[]	[]	[]	[]	[]	[]	[]	new reaction
940	r_0953	SBO:0000176	gapfilling	hmbil[c] <=> uppg1[c]	TRUE	[]	-1000	1000	spontaneous	[]	[]	[]	[]	[]	[]	[]	new reaction
941	r_0954	SBO:0000628	gapfilling	cpppg1[c] ->	FALSE	[]	0	1000	Transport	[]	[]	[]	[]	[]	[]	[]	new reaction
942	r_0955	SBO:0000628	gapfilling	sheme[c] ->	FALSE	[]	0	1000	Transport	[]	[]	[]	[]	[]	[]	[]	new reaction
943	r_0956	SBO:0000632	gapfilling	cbi[c] <=>	TRUE	[]	-1000	1000	Transport	[]	[]	[]	[]	[]	[]	[]	new reaction
944	r_0957	SBO:0000628	gapfilling	prf2[c] ->	FALSE	[]	0	1000	Transport	[]	[]	[]	[]	[]	[]	[]	new reaction
945	r_0958	SBO:0000628	gapfilling	hthbp[c] ->	FALSE	[]	0	1000	Transport	[]	[]	[]	[]	[]	[]	[]	new reaction
946	r_0959	SBO:0000629	free-living	0.3586 gua[c] + 0.3586 csn[c] + 0.2614 ade[c] + 0.0722 thym[c] + 0.1892 ura[c] + 0.18816 lys__L[c] + 0.706188 ala__L[c] + 0.599172 leu__L[c] + 0.231672 phe__L[c] + 0.431004 arg__L[c] + 0.17052 gln__L[c] + 0.497448 gly[c] + 0.143472 met__L[c] + 0.445704 val__L[c] + 0.295764 pro__L[c] + 0.134652 tyr__L[c] + 0.312228 asp__L[c] + 0.343392 glu__L[c] + 0.124068 his__L[c] + 0.30282 thr__L[c] + 0.054684 …	FALSE	[]	0	1000	Biomass	[]	[]	[]	[]	[]	[]	[]	new reaction
947	r_0960	SBO:0000628	Demand reaction free-living product	biomass[c] ->	FALSE	[]	0	1000	Transport	[]	[]	[]	[]	[]	[]	[]	new reaction
948	r_0961	SBO:0000632	gapfilling	pgp_cho[c] <=>	TRUE	[]	-1	1000	Transport	[]	[]	[]	[]	[]	[]	[]	new reaction
949	r_0962	SBO:0000185	gapfilling from PM	tre6p[c] <=> tre6p[e]	TRUE	[]	-1000	1000	Transport	[]	[]	[]	[]	[]	[]	[]	new reaction
950	r_0963	SBO:0000627	gapfilling from PM	tre6p[e] <=>	TRUE	[]	-1000	1000	Exchange	[]	[]	[]	[]	[]	[]	[]	new reaction
951	r_0964	SBO:0000185	gapfilling from PM	acgam[c] <=> acgam[e]	TRUE	[]	-1000	1000	Transport	[]	[]	rxn08042	[]	[]	[]	[]	new reaction
952	r_0965	SBO:0000627	gapfilling from PM	acgam[e] <=>	TRUE	[]	-1000	1000	Exchange	[]	[]	[]	[]	[]	[]	[]	new reaction
953	r_0966	SBO:0000185	gapfilling from PM	asp__L[c] <=> asp__L[e]	TRUE	[]	-1000	1000	Transport	[]	[]	[]	[]	[]	[]	[]	new reaction
954	r_0968	SBO:0000185	gapfilling from PM	akg[c] <=> akg[e]	TRUE	[]	-1000	1000	Transport	[]	[]	[]	[]	[]	[]	[]	new reaction
955	r_0969	SBO:0000627	gapfilling from PM	akg[e] <=>	TRUE	[]	-1000	1000	Exchange	[]	[]	[]	[]	[]	[]	[]	new reaction
956	r_0970	SBO:0000185	gapfilling from PM	ac[c] <=> ac[e]	TRUE	[]	-1000	1000	Transport	[]	[]	[]	[]	[]	[]	[]	new reaction
957	r_0971	SBO:0000627	gapfilling from PM	ac[e] <=>	TRUE	[]	-1000	1000	Exchange	[]	[]	[]	[]	[]	[]	[]	new reaction
958	r_0972	SBO:0000185	gapfilling from PM	for[c] <=> for[e]	TRUE	[]	-1000	1000	Transport	[]	[]	[]	[]	[]	[]	[]	new reaction
959	r_0973	SBO:0000627	gapfilling from PM	for[e] <=>	TRUE	[]	-1000	1000	Exchange	[]	[]	[]	[]	[]	[]	[]	new reaction
960	r_0974	SBO:0000176	gapfilling from PM	2 pi[c] + malt__D[c] -> h2o[c] + 2 g1p[c]	FALSE	[]	0	1000	[]	2.4.1.139	R00957	rxn00703	[]	MALTOSE-SYNTHASE-RXN	MNXR106764	22320	new reaction
961	r_0975	SBO:0000185	gapfilling from PM	malt__D[c] <=> malt__D[e]	FALSE	[]	-1000	1000	Transport	[]	[]	rxn08874	MALTtexi	TRANS-RXN0-575	[]	[]	new reaction
962	r_0976	SBO:0000627	gapfilling from PM	malt__D[e] <=>	TRUE	[]	-1000	1000	Exchange	[]	[]	[]	[]	[]	MNXR100612	[]	new reaction
963	r_0977	SBO:0000176	gapfilling from PM	h2o[c] + cellb[c] -> 2 glc__aD[c]	FALSE	AB395_RS15775	0	1000	Starch and sucrose metabolism	3.2.1.21	R00306	rxn00222	BG(CELLB)	[]	[]	[]	new reaction
964	r_0978	SBO:0000176	gapfilling from PM	atp[c] + glc__aD[c] -> adp[c] + h[c] + g6p[c]	FALSE	AB395_RS18785	0	1000	Glycolysis / Gluconeogenesis	2.7.1.2	R01786	rxn15249	[]	[]	MNXR100612	[]	new reaction
965	r_0979	SBO:0000185	gapfilling from PM	glc__aD[c] <=> glc__aD[e]	TRUE	[]	-1000	1000	Transport	[]	[]	[]	[]	[]	MNXR99985	[]	new reaction
966	r_0980	SBO:0000627	gapfilling from PM	glc__aD[e] <=>	TRUE	[]	-1000	1000	Exchange	[]	[]	[]	[]	[]	MNXR100014	[]	new reaction
967	r_0981	SBO:0000185	gapfilling from PM	cellb[c] <=> cellb[e]	TRUE	[]	-1000	1000	Transport	[]	[]	[]	[]	[]	MNXR103419	[]	new reaction
968	r_0982	SBO:0000627	gapfilling from PM	cellb[e] <=>	TRUE	[]	-1000	1000	Exchange	[]	[]	[]	[]	[]	[]	[]	new reaction
969	r_0983	SBO:0000176	gapfilling from PM	atp[c] + fru[c] -> adp[c] + h[c] + f6p[c]	FALSE	[]	0	1000	Starch and sucrose metabolism	2.7.1.1	R00760	rxn00547	HXK2_4	[]	[]	[]	new reaction
970	r_0984	SBO:0000185	gapfilling from PM	fru[c] <=> fru[e]	TRUE	[]	-1000	1000	Transport	[]	[]	[]	[]	[]	[]	[]	new reaction
971	r_0985	SBO:0000627	gapfilling from PM	fru[e] <=>	TRUE	[]	-1000	1000	Exchange	[]	[]	[]	[]	[]	[]	[]	new reaction
972	r_0986	SBO:0000176	gapfilling from PM	pi[c] + sucr[c] -> fru[c] + g1p[c]	FALSE	[]	0	1000	Starch and sucrose metabolism	2.4.1.7	R00803	rxn00577	[]	[]	[]	[]	new reaction
973	r_0987	SBO:0000185	gapfilling from PM	sucr[c] <=> sucr[e]	TRUE	[]	-1000	1000	Transport	[]	[]	rxn09275	SUCRtex	[]	[]	[]	new reaction
974	r_0988	SBO:0000627	gapfilling from PM	sucr[e] <=>	TRUE	[]	-1000	1000	Exchange	[]	[]	[]	[]	[]	[]	[]	new reaction
975	r_0989	SBO:0000176	gapfilling from PM	atp[c] + gal[c] -> adp[c] + h[c] + gal1p[c]	FALSE	[]	0	1000	Galactose metabolism	2.7.1.6	R01092	rxn00808	GALKr	GALACTOKIN-RXN	MNXR99985	13556	new reaction
976	r_0990	SBO:0000176	gapfilling from PM	utp[c] + gal1p[c] <=> ppi[c] + udpgal[c]	TRUE	[]	-1000	1000	Galactose metabolism	2.7.7.10	R00502	rxn00355	GALTi	UTPHEXPURIDYLYLTRANS-RXN	MNXR100014	14212	new reaction
977	r_0991	SBO:0000185	gapfilling from PM	gal[c] + h[c] <=> gal[e] + h[e]	TRUE	[]	-1000	1000	Transport	[]	[]	rxn05566	GALt2pp	TRANS-RXN-21	MNXR103419	[]	new reaction
978	r_0992	SBO:0000627	gapfilling from PM	gal[e] <=>	TRUE	[]	-1000	1000	Exchange	[]	[]	[]	[]	[]	[]	[]	new reaction
979	r_0993	SBO:0000176	gapfilling from PM	h2o[c] + raffin[c] -> sucr[c] + gal[c]	FALSE	[]	0	1000	Galactose metabolism	3.2.1.22	R01103	rxn00818	YBR184W_3	RXN-11502	MNXR103419	[]	new reaction
980	r_0994	SBO:0000185	gapfilling from PM	raffin[c] +h[c] <=> raffin[e] + h[e]	TRUE	[]	-1000	1000	Transport	[]	[]	rxn05643	[]	[]	[]	[]	new reaction
981	r_0995	SBO:0000627	gapfilling from PM	raffin[e] <=>	TRUE	[]	-1000	1000	Exchange	[]	[]	[]	[]	[]	[]	[]	new reaction
982	r_0996	SBO:0000176	gapfilling from PM	h2o[c] + lcts[c] -> glc__aD[c] + gal[c]	FALSE	[]	0	1000	Galactose metabolism	3.2.1.23	R01678	rxn15230	[]	[]	[]	[]	new reaction
983	r_0997	SBO:0000185	gapfilling from PM	lcts[c] <=> lcts[e]	TRUE	[]	-1000	1000	Transport	[]	[]	rxn08780	LCTStex	[]	[]	[]	new reaction
984	r_0998	SBO:0000627	gapfilling from PM	lcts[e] <=>	TRUE	[]	-1000	1000	Exchange	[]	[]	[]	[]	[]	[]	[]	new reaction
985	r_0999	SBO:0000176	gapfilling from PM	h2o[c] + melib[c] -> glc__aD[c] + gal[c]	FALSE	[]	0	1000	Galactose metabolism	[]	[]	rxn31411	[]	[]	[]	[]	new reaction
986	r_1000	SBO:0000185	gapfilling from PM	melib[c] <=> melib[e]	TRUE	[]	-1000	1000	Transport	[]	[]	rxn08908	MELIBtex	[]	[]	[]	new reaction
987	r_1001	SBO:0000627	gapfilling from PM	melib[e] <=>	TRUE	[]	-1000	1000	Exchange	[]	[]	[]	[]	[]	[]	[]	new reaction
988	r_1002	SBO:0000176	gapfilling from PM	atp[c] + man[c] -> adp[c] + h[c] + man6p[c]	FALSE	[]	0	1000	Fructose and mannose metabolism	2.7.1.1	R01326	rxn00975	HXK2_3	MANNKIN-RXN	MNXR95795	11029	new reaction
989	r_1003	SBO:0000185	gapfilling from PM	man[c] <=> man[e]	TRUE	[]	-1000	1000	Transport	[]	[]	rxn08886	HXT10_4	[]	[]	[]	new reaction
990	r_1004	SBO:0000627	gapfilling from PM	man[e] <=>	TRUE	[]	-1000	1000	Exchange	[]	[]	[]	[]	[]	[]	[]	new reaction
991	r_1005	SBO:0000176	gapfilling from PM	nadp[c] + sbt__D[c] <=> nadph[c] + h[c] + glc__aD[c]	TRUE	[]	-1000	1000	Fructose and mannose metabolism	1.1.1.21	R01787	rxn01310	SBTR	[]	[]	[]	new reaction
992	r_1006	SBO:0000185	gapfilling from PM	sbt__D[c] <=> sbt__D[e]	TRUE	[]	-1000	1000	Transport	[]	[]	rxn09243	SBTtex	[]	[]	[]	new reaction
993	r_1007	SBO:0000627	gapfilling from PM	sbt__D[e] <=>	TRUE	[]	-1000	1000	Exchange	[]	[]	[]	[]	[]	[]	[]	new reaction
994	r_1008	SBO:0000176	gapfilling from PM	nad[c] + mnl[c] <=> nadh[c] + h[c] + fru[c]	TRUE	[]	-1000	1000	Fructose and mannose metabolism	1.1.1.11	R00868	rxn00629	MNLDH	[]	[]	[]	new reaction
995	r_1009	SBO:0000185	gapfilling from PM	mnl[c] <=> mnl[e]	TRUE	[]	-1000	1000	Transport	[]	[]	rxn08950	MNLtex	[]	[]	[]	new reaction
996	r_1010	SBO:0000627	gapfilling from PM	mnl[e] <=>	TRUE	[]	-1000	1000	Exchange	[]	[]	[]	[]	[]	[]	[]	new reaction
997	r_1011	SBO:0000176	gapfilling from PM	nad[c] + abt__D[c] <=> nadh[c] + h[c] + rbl__D[c]	TRUE	[]	-1000	1000	Pentose and glucuronate interconversions	1.1.1.250	R07134	rxn04932	[]	1.1.1.250-RXN	MNXR110836	17389	new reaction
998	r_1012	SBO:0000185	gapfilling from PM	abt__D[c] <=> abt__D[e]	TRUE	[]	-1000	1000	Transport	[]	[]	rxn29406	[]	[]	MNXR116259	[]	new reaction
999	r_1013	SBO:0000627	gapfilling from PM	abt__D[e] <=>	TRUE	[]	-1000	1000	Exchange	[]	[]	[]	[]	[]	[]	[]	new reaction
1000	r_1014	SBO:0000176	gapfilling from PM	atp[c] + rbl__D[c] -> adp[c] + h[c] + ru5p__D[c]	FALSE	[]	0	1000	Pentose and glucuronate interconversions	2.7.1.16	R01526	rxn01114	RBK_Dr	RIBULOKIN-RXN	MNXR116259	[]	new reaction
1001	r_1015	SBO:0000185	gapfilling from PM	glyc[c] <=> glyc[e]	TRUE	[]	-1000	1000	Transport	[]	[]	[]	[]	[]	[]	[]	new reaction
1002	r_1016	SBO:0000627	gapfilling from PM	glyc[e] <=>	TRUE	[]	-1000	1000	Exchange	[]	[]	[]	[]	[]	[]	[]	new reaction
1003	r_1017	SBO:0000185	gapfilling from PM	f6p[c] <=> f6p[e]	TRUE	[]	-1000	1000	Transport	[]	[]	[]	[]	[]	[]	[]	new reaction
1004	r_1018	SBO:0000627	gapfilling from PM	f6p[e] <=>	TRUE	[]	-1000	1000	Exchange	[]	[]	[]	[]	[]	[]	[]	new reaction
1005	r_1019	SBO:0000185	gapfilling from PM	arg__L[c] <=> arg__L[e]	TRUE	[]	-1000	1000	Transport	[]	[]	[]	[]	[]	[]	[]	new reaction
1006	r_1020	SBO:0000627	gapfilling from PM	arg__L[e] <=>	TRUE	[]	-1000	1000	Exchange	[]	[]	[]	[]	[]	[]	[]	new reaction
1007	r_1021	SBO:0000176	gapfilling from PM	nad[c] + quin[c] <=> nadh[c] + h[c] + 3dhq[c]	TRUE	[]	-1000	1000	Phenylalanine, tyrosine and tryptophan biosynthesis	1.1.1.24	R01872	rxn01363	[]	RXN-7967	[]	[]	new reaction
1008	r_1022	SBO:0000185	gapfilling from PM	quin[c] <=> quin[e]	TRUE	[]	-1000	1000	Transport	[]	[]	rxn12452	[]	[]	[]	[]	new reaction
1009	r_1023	SBO:0000627	gapfilling from PM	quin[e] <=>	TRUE	[]	-1000	1000	Exchange	[]	[]	[]	[]	[]	[]	[]	new reaction
1010	r_1024	SBO:0000176	gapfilling from PM	nad[c] + lac__L[c] <=> nadh[c] + h[c] + pyr[c]	TRUE	[]	-1000	1000	Glycolysis / Gluconeogenesis	1.1.1.27	R00703	rxn00499	LDH_L	L-LACTATE-DEHYDROGENASE-RXN	MNXR101040	23447	new reaction
1011	r_1025	SBO:0000185	gapfilling from PM	lac__L[c] <=> lac__L[e]	TRUE	[]	-1000	1000	Transport	[]	[]	rxn08795	L-LACtex	[]	MNXR116740	26348	new reaction
1012	r_1026	SBO:0000627	gapfilling from PM	lac__L[e] <=>	TRUE	[]	-1000	1000	Exchange	[]	[]	[]	[]	[]	MNXR113863	38104	new reaction
1013	r_1027	SBO:0000185	gapfilling from PM	4abut[c] <=> 4abut[e]	TRUE	[]	-1000	1000	Transport	[]	[]	rxn08028	ABUTtex	[]	MNXR113881	[]	new reaction
1014	r_1028	SBO:0000627	gapfilling from PM	4abut[e] <=>	TRUE	[]	-1000	1000	Exchange	[]	[]	[]	[]	[]	MNXR117108	[]	new reaction
1015	r_1029	SBO:0000176	gapfilling from PM	nadp[c] + galctn__L[c] <=> nadph[c] + h[c] + galur[c]	TRUE	AB395_RS00480 or AB395_RS08760 or AB395_RS09800 or AB395_RS12225 or AB395_RS18840 or AB395_RS21780 or AB395_RS23700	-1000	1000	Pentose and glucuronate interconversions	1.1.1.-	R07676	rxn07491	[]	RXN-11151	MNXR116740	26348	new reaction
1016	r_1030	SBO:0000176	gapfilling from PM	galctn__L[c] -> h2o[c] + 2dh3dgal[c]	FALSE	[]	0	1000	Pentose and glucuronate interconversions	4.2.1.146	R10532	rxn21749	[]	RXN-11380	MNXR113863	38104	new reaction
1017	r_1031	SBO:0000176	gapfilling from PM	2dh3dgal[c] <=> pyr[c] + glycs[c]	TRUE	[]	-1000	1000	Pentose and glucuronate interconversions	4.1.2.54	R10550	rxn21750	[]	RXN-11381	MNXR113881	38110	new reaction
1018	r_1032	SBO:0000176	gapfilling from PM	nadph[c] + h[c] + glycs[c] <=> nadp[c] + glyc[c]	TRUE	[]	-1000	1000	Pentose and glucuronate interconversions	1.1.1.372	R10563	rxn09954	[]	RXN-11709	MNXR117108	30028	new reaction
1019	r_1033	SBO:0000185	gapfilling from PM	galur[c] <=> galur[e]	TRUE	[]	-1000	1000	Transport	[]	[]	rxn08589	GALURtex	[]	[]	17236	new reaction
1020	r_1034	SBO:0000627	gapfilling from PM	galur[e] <=>	TRUE	[]	-1000	1000	Exchange	[]	[]	[]	[]	[]	[]	12377	new reaction
1021	r_1035	SBO:0000185	gapfilling from PM	galctn__L[c] <=> galctn__L[e]	TRUE	[]	-1000	1000	Transport	[]	[]	rxn08577	GALCTNLtex	[]	[]	12936	new reaction
1022	r_1036	SBO:0000627	gapfilling from PM	galctn__L[e] <=>	TRUE	[]	-1000	1000	Exchange	[]	[]	[]	[]	[]	[]	[]	new reaction
1023	r_1037	SBO:0000176	gapfilling from PM	fuc__L[c] <=> fcl__L[c]	TRUE	[]	-1000	1000	Fructose and mannose metabolism	5.3.1.3	R03163	rxn02263	FCI	FUCISOM-RXN	MNXR115894	17236	new reaction
1024	r_1038	SBO:0000176	gapfilling from PM	atp[c] + fcl__L[c] -> adp[c] + h[c] + fc1p[c]	FALSE	[]	0	1000	Fructose and mannose metabolism	2.7.1.51	R03241	rxn02319	FCLK	FUCULOKIN-RXN	MNXR99469	12377	new reaction
1025	r_1039	SBO:0000176	gapfilling from PM	fc1p[c] <=> dhap[c] + lald__L[c]	TRUE	[]	-1000	1000	Fructose and mannose metabolism	4.1.2.17	R02262	rxn01620	FCLPA	FUCPALDOL-RXN	MNXR99470	12936	new reaction
1026	r_1040	SBO:0000176	gapfilling from PM	h2o[c] + nad[c] + lald__L[c] <=> nadh[c] + 2 h[c] + lac__L[c]	TRUE	[]	-1000	1000	Pyruvate metabolism	1.2.1.22	R01446	rxn01053	LCADm	RXN-12166	[]	[]	new reaction
1027	r_1041	SBO:0000185	gapfilling from PM	fuc__L[c] + h[c] <=> fuc__L[e] + h[e]	TRUE	[]	-1000	1000	Transport	[]	[]	rxn08541	FUCtpp	[]	[]	[]	new reaction
1028	r_1042	SBO:0000627	gapfilling from PM	fuc__L[e] <=>	TRUE	[]	-1000	1000	Exchange	[]	[]	[]	[]	[]	[]	[]	new reaction
1029	r_1043	SBO:0000176	gapfilling from PM	pep[c] + rbl_B[c] <=> pyr[c] + salcn6p[c]	TRUE	[]	-1000	1000	[]	[]	[]	rxn05647	SALCpts	[]	[]	[]	new reaction
1030	r_1044	SBO:0000176	gapfilling from PM	h2o[c] + salcn6p[c] -> g6p[c] + slgn[c]	FALSE	[]	0	1000	[]	[]	[]	rxn09992	S6PG	[]	[]	[]	new reaction
1031	r_1045	SBO:0000628	gapfilling from PM	slgn[c] ->	FALSE	[]	0	1000	Transport	[]	[]	[]	[]	[]	[]	[]	new reaction
1032	r_1046	SBO:0000185	gapfilling from PM	rbl_B[c] + h[c] <=> rbl_B[e] + h[e]	TRUE	[]	-1000	1000	Transport	[]	[]	rxn12540	[]	TRANS-RXN-246	[]	[]	new reaction
1033	r_1047	SBO:0000627	gapfilling from PM	rbl_B[e] <=>	TRUE	[]	-1000	1000	Exchange	[]	[]	[]	[]	[]	[]	[]	new reaction
1034	r_1048	SBO:0000176	gapfilling from PM	rmn[c] <=> rml[c]	TRUE	[]	-1000	1000	Fructose and mannose metabolism	5.3.1.14	R02437	rxn01761	RMI	RHAMNISOM-RXN	MNXR116248	23163	new reaction
1035	r_1049	SBO:0000176	gapfilling from PM	atp[c] + rml[c] -> adp[c] + h[c] + rml1p[c]	FALSE	[]	0	1000	Fructose and mannose metabolism	2.7.1.5	R03014	rxn02161	RMK	RHAMNULOKIN-RXN	MNXR116249	20118	new reaction
1036	r_1050	SBO:0000176	gapfilling from PM	rml1p[c] <=> dhap[c] + lald__L[c]	TRUE	[]	-1000	1000	Fructose and mannose metabolism	4.1.2.19	R02263	rxn01621	RMPA	RHAMNULPALDOL-RXN	MNXR104043	19692	new reaction
1037	r_1051	SBO:0000185	gapfilling from PM	rmn[c] <=> rmn[e]	TRUE	[]	-1000	1000	Transport	[]	[]	rxn09229	RMNtex	[]	[]	[]	new reaction
1038	r_1052	SBO:0000627	gapfilling from PM	rmn[e] <=>	TRUE	[]	-1000	1000	Exchange	[]	[]	[]	[]	[]	[]	[]	new reaction
1039	r_1053	SBO:0000185	gapfilling from PM	34hpp[c] + h[c] <=> 34hpp[e] + h[e]	TRUE	[]	-1000	1000	Transport	[]	[]	rxn09869	34HPPt2p	[]	[]	[]	new reaction
1040	r_1054	SBO:0000627	gapfilling from PM	34hpp[e] <=>	TRUE	[]	-1000	1000	Exchange	[]	[]	[]	[]	[]	[]	[]	new reaction
1041	r_1055	SBO:0000176	gapfilling from PM	acgala[c] + pplhis[c] -> acgal6p[c] + phis__L[c]	FALSE	AB395_RS00575 or AB395_RS01340 or AB395_RS12215 or AB395_RS21990 or AB395_RS23535 or AB395_RS25370	0	1000	Galactose metabolism	2.7.1.-	R08366	rxn11878	[]	[]	[]	[]	new reaction
1042	r_1056	SBO:0000176	gapfilling from PM	h2o[c] + acgal6p[c] <=> ac[c] + galam6p[c]	TRUE	AB395_RS18995	-1000	1000	Galactose metabolism	3.5.1.25	R05168	rxn03504	[]	3.5.1.80-RXN	MNXR109369	18150	new reaction
1043	r_1057	SBO:0000176	gapfilling from PM	h2o[c] + galam6p[c] -> nh3[c] + tag6p__D[c]	FALSE	[]	0	1000	Galactose metabolism	3.5.99.-	R08365	rxn11877	[]	RXN-13548	MNXR99931	47681	new reaction
1044	r_1058	SBO:0000176	gapfilling from PM	tag6p__D[c] <=> f6p[c]	TRUE	[]	-1000	1000	Galactose metabolism	5.1.3.40	R11623	[]	[]	[]	[]	[]	new reaction
1045	r_1059	SBO:0000185	gapfilling from PM	acgala[c] <=> acgala[e]	TRUE	[]	-1000	1000	Transport	[]	[]	rxn08037	ACGALtex	[]	[]	[]	new reaction
1046	r_1060	SBO:0000627	gapfilling from PM	acgala[e] <=>	TRUE	[]	-1000	1000	Exchange	[]	[]	[]	[]	[]	[]	[]	new reaction
1047	r_1061	SBO:0000176	gapfilling from PM	h2o[c] + gam6p[c] <=> nh3[c] + f6p[c]	TRUE	[]	-1000	1000	Amino sugar and nucleotide sugar metabolism	3.5.99.6	R00765	rxn00552	G6PDA	[]	[]	[]	new reaction
1048	r_1062	SBO:0000176	gapfilling from PM	h2o[c] + 4fumacac[c] -> h[c] + fum[c] + acac[c]	FALSE	[]	0	1000	Tyrosine metabolism	3.7.1.2	R01364	rxn33228	U60	FUMARYLACETOACETASE-RXN	MNXR99706	10245	new reaction
1049	r_1064	SBO:0000176	gapfilling from PM	24dab[c] + accoa[c] -> n4acld[c] + coa[c]	FALSE	[]	0	1000	Glycine, serine and threonine metabolism	2.3.1.178	R06978	rxn04787	[]	R102-RXN	MNXR110695	16904	new reaction
1050	r_1065	SBO:0000176	gapfilling from PM	n4acld[c] -> h2o[c] + ecto__L[c]	FALSE	[]	0	1000	Glycine, serine and threonine metabolism	4.2.1.108	R06979	rxn04788	[]	R103-RXN	MNXR110696	17281	new reaction
1051	r_1068	SBO:0000176	gapfilling from PM	acald[c] + thmpp[c] <=> 2ahethmpp[c]	TRUE	[]	-1000	1000	Glycolysis / Gluconeogenesis	4.1.1.1	R00755	rxn00544	[]	[]	[]	[]	new reaction
1052	r_1070	SBO:0000176	gapfilling from PM	asp__L[c] + phpyr[c] <=> oaa[c] + phe__L[c]	TRUE	[]	-1000	1000	[]	2.6.1.70	R00695	rxn00494	[]	2.6.1.70-RXN	MNXR125757	14100	new reaction

## Sheet: Metabolites
Metabolites in iAQY970
Number	Abbreviation	Metabolite Names	KEGG ID	ModelSEED	Formula	Charge	MetaCyc ID	BIGG ID	HMDB	MetaNetX	PubChem	Reactome	InChI	InChI-Key	ChEBI	MetSBO
1	atp[c]	ATP	C00002	cpd00002	C10H13N5O13P3	-4	ATP	atp_c	HMDB00538	MNXM3	5461108	[]	InChI=1S/C10H16N5O13P3/c11-8-5-9(13-2-12-8)15(3-14-5)10-7(17)6(16)4(26-10)1-25-30(21,22)28-31(23,24)27-29(18,19)20/h2-4,6-7,10,16-17H,1H2,(H,21,22)(H,23,24)(H2,11,12,13)(H2,18,19,20)/p-4/t4-,6-,7-,10-/m1/s1	ZKHQWZAMYRWXGA-KQYNXXCUSA-J	CHEBI:30616	SBO:0000247
2	g1p[c]	D-Glucose 1-phosphate	C00103	cpd00089	C6H12O9P	-2	D-glucose-1-phosphates	g1p_c	[]	[]	[]	[]	InChI=1S/C6H13O9P/c7-1-2-3(8)4(9)5(10)6(14-2)15-16(11,12)13/h2-10H,1H2,(H2,11,12,13)/p-2/t2-,3-,4+,5-,6?/m1/s1	HXXFSFRBOHSIMQ-GASJEMHNSA-L	CHEBI:57629	SBO:0000247
3	h[c]	H+	C00080	cpd00067	H	1	PROTON	h_c	HMDB59597	MNXM1	1038	[]	InChI=1S/p+1	GPRLSGONYQIRFK-UHFFFAOYSA-N	CHEBI:15378	SBO:0000247
4	ppi[c]	pyrophosphate	C00013	cpd00012	HO7P2	-3	PPI	ppi_c	HMDB00250	[]	1023	[]	InChI=1S/H4O7P2/c1-8(2,3)7-9(4,5)6/h(H2,1,2,3)(H2,4,5,6)/p-3	XPPKVPWEQAFLFU-UHFFFAOYSA-K	CHEBI:29888	SBO:0000247
5	adpglc[c]	ADPglucose	C00498	cpd00387	C16H23N5O15P2	-2	ADP-D-GLUCOSE	adpglc_c	HMDB06557	MNXM561	42609821	[]	InChI=1S/C16H25N5O15P2/c17-13-7-14(19-3-18-13)21(4-20-7)15-11(26)9(24)6(33-15)2-32-37(28,29)36-38(30,31)35-16-12(27)10(25)8(23)5(1-22)34-16/h3-6,8-12,15-16,22-27H,1-2H2,(H,28,29)(H,30,31)(H2,17,18,19)/p-2/t5-,6-,8-,9-,10+,11-,12-,15-,16-/m1/s1	WFPZSXYXPSUOPY-ROYWQJLOSA-L	CHEBI:57498	SBO:0000247
6	h2o[c]	H2O	C00001	cpd00001	H2O	0	WATER	h2o_c	HMDB02111	[]	962	[]	InChI=1S/H2O/h1H2	XLYOFNOQVPJJNP-UHFFFAOYSA-N	CHEBI:15377	SBO:0000247
7	gln__L[c]	L-Glutamine	C00064	cpd00053	C5H10N2O3	0	GLN	gln__L_c	HMDB00641	MNXM37	6992086	[]	InChI=1S/C5H10N2O3/c6-3(5(9)10)1-2-4(7)8/h3H,1-2,6H2,(H2,7,8)(H,9,10)/t3-/m0/s1	ZDXPYRJPNDTMRX-VKHMYHEASA-N	CHEBI:58359	SBO:0000247
8	glu__L[c]	L-Glutamate	C00025	cpd00023	C5H8NO4	-1	GLT	glu__L_c	HMDB00148	[]	5460299	[]	InChI=1S/C5H9NO4/c6-3(5(9)10)1-2-4(7)8/h3H,1-2,6H2,(H,7,8)(H,9,10)/p-1/t3-/m0/s1	WHUUTDBJXJRKMK-VKHMYHEASA-M	CHEBI:29985	SBO:0000247
9	nh3[c]	Ammonia	C00014	cpd00013	H3N	0	AMMONIA	nh3_c	HMDB00051	[]	222	[]	InChI=1S/H3N/h1H3	QGZKDVFQNNGYKY-UHFFFAOYSA-N	CHEBI:16134	SBO:0000247
10	nadh[c]	Nicotinamide adenine dinucleotide - reduced	C00004	cpd00004	C21H27N7O14P2	-2	NADH	nadh_c	HMDB01487	MNXM10	21604869	[]	InChI=1S/C21H29N7O14P2/c22-17-12-19(25-7-24-17)28(8-26-12)21-16(32)14(30)11(41-21)6-39-44(36,37)42-43(34,35)38-5-10-13(29)15(31)20(40-10)27-3-1-2-9(4-27)18(23)33/h1,3-4,7-8,10-11,13-16,20-21,29-32H,2,5-6H2,(H2,23,33)(H,34,35)(H,36,37)(H2,22,24,25)/p-2/t10-,11-,13-,14-,15-,16-,20-,21-/m1/s1	BOPGDPNILDQYTO-NNYOXOHSSA-L	CHEBI:57945	SBO:0000247
11	aacoa[c]	Acetoacetyl-CoA	C00332	cpd00279	C25H37N7O18P3S	-3	ACETOACETYL-COA	aacoa_c	HMDB01484	MNXM133	45266540	[]	InChI=1S/C25H40N7O18P3S/c1-13(33)8-16(35)54-7-6-27-15(34)4-5-28-23(38)20(37)25(2,3)10-47-53(44,45)50-52(42,43)46-9-14-19(49-51(39,40)41)18(36)24(48-14)32-12-31-17-21(26)29-11-30-22(17)32/h11-12,14,18-20,24,36-37H,4-10H2,1-3H3,(H,27,34)(H,28,38)(H,42,43)(H,44,45)(H2,26,29,30)(H2,39,40,41)/p-4/t14-,18-,19-,20+,24-/m1/s1	OJFDKHTZOUZBOS-CITAKDKDSA-J	CHEBI:57286	SBO:0000247
12	nad[c]	Nicotinamide adenine dinucleotide	C00003	cpd00003	C21H26N7O14P2	-1	NAD	nad_c	HMDB00902	MNXM8	15938971	[]	InChI=1S/C21H27N7O14P2/c22-17-12-19(25-7-24-17)28(8-26-12)21-16(32)14(30)11(41-21)6-39-44(36,37)42-43(34,35)38-5-10-13(29)15(31)20(40-10)27-3-1-2-9(4-27)18(23)33/h1-4,7-8,10-11,13-16,20-21,29-32H,5-6H2,(H5-,22,23,24,25,33,34,35,36,37)/p-1/t10-,11-,13-,14-,15-,16-,20-,21-/m1/s1	BAWFJGJZGIEFAR-NNYOXOHSSA-M	CHEBI:57540	SBO:0000247
13	3hbcoa[c]	(S)-3-Hydroxybutanoyl-CoA	C01144	cpd00842	C25H39N7O18P3S	-3	S-3-HYDROXYBUTANOYL-COA	3hbcoa_c	HMDB62259	MNXM446	45266553	77251	InChI=1S/C25H42N7O18P3S/c1-13(33)8-16(35)54-7-6-27-15(34)4-5-28-23(38)20(37)25(2,3)10-47-53(44,45)50-52(42,43)46-9-14-19(49-51(39,40)41)18(36)24(48-14)32-12-31-17-21(26)29-11-30-22(17)32/h11-14,18-20,24,33,36-37H,4-10H2,1-3H3,(H,27,34)(H,28,38)(H,42,43)(H,44,45)(H2,26,29,30)(H2,39,40,41)/p-4/t13-,14+,18+,19+,20-,24+/m0/s1	QHHKKMYHDBRONY-VKBDFPRVSA-J	CHEBI:57316	SBO:0000247
14	s[c]	sulfur atom	C00087	cpd00074	S	0	Elemental-Sulfur	s_c	[]	MNXM89	[]	[]	InChI=1S/S	NINIDFKCEFEMDL-UHFFFAOYSA-N	CHEBI:17909	SBO:0000247
15	fe2[c]	Fe2+	C14818	cpd10515	Fe	2	FE+2	fe2_c	HMDB00692	MNXM111	27284	[]	InChI=1S/Fe/q+2	CWYNVVGOOAEACU-UHFFFAOYSA-N	CHEBI:29033	SBO:0000247
16	Iron[c]	Iron sulfur cluster	[]	cpd24604	Fe2S2	0	CPD-6	[]	[]	[]	[]	[]	InChI=1S/2Fe.2S	NIXDOXVAJZFRNF-UHFFFAOYSA-N	CHEBI:33739	SBO:0000247
17	nadph[c]	Nicotinamide adenine dinucleotide phosphate - reduced	C00005	cpd00005	C21H27N7O17P3	-3	NADPH	nadph_c	HMDB00221	MNXM6	15983949	[]	InChI=1S/C21H30N7O17P3/c22-17-12-19(25-7-24-17)28(8-26-12)21-16(44-46(33,34)35)14(30)11(43-21)6-41-48(38,39)45-47(36,37)40-5-10-13(29)15(31)20(42-10)27-3-1-2-9(4-27)18(23)32/h1,3-4,7-8,10-11,13-16,20-21,29-31H,2,5-6H2,(H2,23,32)(H,36,37)(H,38,39)(H2,22,24,25)(H2,33,34,35)/p-4/t10-,11-,13-,14-,15-,16-,20-,21-/m1/s1	ACFIXJIJDZMPPO-NNYOXOHSSA-J	CHEBI:57783	SBO:0000247
18	3odecACP[c]	3-Oxodecanoyl-[acyl-carrier protein]	C05753	cpd11487	C21H36N2O8PSR	-1	3-oxo-decanoyl-ACPs	3odecACP_c	[]	MNXM26616	[]	[]	[]	[]	CHEBI:1634	SBO:0000247
19	nadp[c]	Nicotinamide adenine dinucleotide phosphate	C00006	cpd00006	C21H26N7O17P3	-2	NADP	nadp_c	HMDB00217	MNXM5	15938972	[]	InChI=1S/C21H28N7O17P3/c22-17-12-19(25-7-24-17)28(8-26-12)21-16(44-46(33,34)35)14(30)11(43-21)6-41-48(38,39)45-47(36,37)40-5-10-13(29)15(31)20(42-10)27-3-1-2-9(4-27)18(23)32/h1-4,7-8,10-11,13-16,20-21,29-31H,5-6H2,(H7-,22,23,24,25,32,33,34,35,36,37,38,39)/p-3/t10-,11-,13-,14-,15-,16-,20-,21-/m1/s1	XJLXINKUBYWONI-NNYOXOHSSA-K	CHEBI:58349	SBO:0000247
20	3hdecACP[c]	(R)-3-Hydroxydecanoyl-[acyl-carrier protein]	C04619	cpd11482	C21H38N2O8PSR	-1	Beta-hydroxydecanoyl-ACPs	3hdecACP_c	[]	MNXM7127	[]	[]	[]	[]	[]	SBO:0000247
21	coa[c]	Coenzyme A	C00010	cpd00010	C21H33N7O16P3S	-3	CO-A	coa_c	HMDB01423	MNXM727276	25113190	[]	InChI=1S/C21H36N7O16P3S/c1-21(2,16(31)19(32)24-4-3-12(29)23-5-6-48)8-41-47(38,39)44-46(36,37)40-7-11-15(43-45(33,34)35)14(30)20(42-11)28-10-27-13-17(22)25-9-26-18(13)28/h9-11,14-16,20,30-31,48H,3-8H2,1-2H3,(H,23,29)(H,24,32)(H,36,37)(H,38,39)(H2,22,25,26)(H2,33,34,35)/p-4/t11-,14-,15-,16+,20-/m1/s1	RGJOEKWQDUBAIZ-IBOSZNHHSA-J	CHEBI:57287	SBO:0000247
22	hdca[c]	Hexadecanoate (n-C16:0)	C00249	cpd00214	C16H31O2	-1	PALMITATE	hdca_c	HMDB00220	MNXM108	504166	[]	InChI=1S/C16H32O2/c1-2-3-4-5-6-7-8-9-10-11-12-13-14-15-16(17)18/h2-15H2,1H3,(H,17,18)/p-1	IPCSVZSSVZVIGE-UHFFFAOYSA-M	CHEBI:7896	SBO:0000247
23	amp[c]	AMP	C00020	cpd00018	C10H13N5O7P	-1	AMP	amp_c	HMDB00045	[]	15938965	[]	InChI=1S/C10H14N5O7P/c11-8-5-9(13-2-12-8)15(3-14-5)10-7(17)6(16)4(22-10)1-21-23(18,19)20/h2-4,6-7,10,16-17H,1H2,(H2,11,12,13)(H2,18,19,20)/p-2/t4-,6-,7-,10-/m1/s1	UDMBCSSLTHHNCD-KQYNXXCUSA-L	CHEBI:456215	SBO:0000247
24	pmtcoa[c]	Palmitoyl-CoA (n-C16:0CoA)	C00154	cpd00134	C37H63N7O17P3S	-3	PALMITYL-COA	pmtcoa_c	HMDB01338	MNXM88	45266605	5358339	InChI=1S/C37H66N7O17P3S/c1-4-5-6-7-8-9-10-11-12-13-14-15-16-17-28(46)65-21-20-39-27(45)18-19-40-35(49)32(48)37(2,3)23-58-64(55,56)61-63(53,54)57-22-26-31(60-62(50,51)52)30(47)36(59-26)44-25-43-29-33(38)41-24-42-34(29)44/h24-26,30-32,36,47-48H,4-23H2,1-3H3,(H,39,45)(H,40,49)(H,53,54)(H,55,56)(H2,38,41,42)(H2,50,51,52)/p-4/t26-,30-,31-,32+,36-/m1/s1	MNBKLUUYKPBKDU-BBECNAHFSA-J	CHEBI:57379	SBO:0000247
25	duri[c]	Deoxyuridine	C00526	cpd00412	C9H12N2O5	0	DEOXYURIDINE	duri_c	HMDB00012	MNXM492	13712	500430	InChI=1S/C9H12N2O5/c12-4-6-5(13)3-8(16-6)11-2-1-7(14)10-9(11)15/h1-2,5-6,8,12-13H,3-4H2,(H,10,14,15)/t5-,6+,8+/m0/s1	MXHRCPNRJAMMIM-SHYZEUOFSA-N	CHEBI:16450	SBO:0000247
26	pi[c]	orthophosphate	C00009	cpd00009	HO4P	-2	CPD-20124	pi_c	[]	[]	1004	[]	InChI=1S/H3O4P/c1-5(2,3)4/h(H3,1,2,3,4)	NBIIXXVUZAFLBC-UHFFFAOYSA-N	CHEBI:26078	SBO:0000247
27	2dr1p[c]	2-Deoxy-D-ribose 1-phosphate	C00672	cpd00509	C5H10O7P	-1	DEOXY-D-RIBOSE-1-PHOSPHATE	2dr1p_c	HMDB01351	MNXM789	23419734	112032	InChI=1S/C5H11O7P/c6-2-4-3(7)1-5(11-4)12-13(8,9)10/h3-7H,1-2H2,(H2,8,9,10)/p-2/t3-,4+,5+/m0/s1	KBDKAJNTYKVSEK-VPENINKCSA-L	CHEBI:57259	SBO:0000247
28	ura[c]	Uracil	C00106	cpd00092	C4H4N2O2	0	URACIL	ura_c	HMDB00300	MNXM158	1174	83962	InChI=1S/C4H4N2O2/c7-3-1-2-5-4(8)6-3/h1-2H,(H2,5,6,7,8)	ISAKRJDGNUQOIC-UHFFFAOYSA-N	CHEBI:17568	SBO:0000247
29	g6p[c]	D-Glucose 6-phosphate	C00092	cpd00079	C6H12O9P	-1	D-glucopyranose-6-phosphate	g6p_c	[]	MNXM160	[]	1629756	InChI=1S/C6H13O9P/c7-3-2(1-14-16(11,12)13)15-6(10)5(9)4(3)8/h2-10H,1H2,(H2,11,12,13)/p-2/t2-,3-,4+,5-,6?/m1/s1	NBSCHQHZLSJFNQ-GASJEMHNSA-L	CHEBI:4170	SBO:0000247
30	6pgl[c]	6-phospho-D-glucono-1,5-lactone	C01236	cpd00911	C6H10O9P	-1	D-6-P-GLUCONO-DELTA-LACTONE	6pgl_c	HMDB01127	MNXM429	46926335	31467	InChI=1S/C6H11O9P/c7-3-2(1-14-16(11,12)13)15-6(10)5(9)4(3)8/h2-5,7-9H,1H2,(H2,11,12,13)/p-2/t2-,3-,4+,5-/m1/s1	IJOJIVNDFQSGAB-SQOUGZDYSA-L	CHEBI:57955	SBO:0000247
31	3c4mop[c]	(2S)-2-Isopropyl-3-oxosuccinate	C04236	cpd02605	C7H8O5	-2	CPD-7100	3c4mop_c	HMDB12149	MNXM1602	6419705	[]	InChI=1S/C7H10O5/c1-3(2)4(6(9)10)5(8)7(11)12/h3-4H,1-2H3,(H,9,10)(H,11,12)/p-2/t4-/m0/s1	HIIZAGQWABAMRR-BYPYZUCNSA-L	CHEBI:17214	SBO:0000247
32	co2[c]	CO2	C00011	cpd00011	CO2	0	CARBON-DIOXIDE	co2_c	HMDB01967	MNXM13	280	[]	InChI=1S/CO2/c2-1-3	CURLTUGMZLYLDI-UHFFFAOYSA-N	CHEBI:16526	SBO:0000247
33	4mop[c]	4-Methyl-2-oxopentanoate	C00233	cpd00200	C6H9O3	-1	2K-4CH3-PENTANOATE	4mop_c	HMDB00695	MNXM404	3527278	[]	InChI=1S/C6H10O3/c1-4(2)3-5(7)6(8)9/h4H,3H2,1-2H3,(H,8,9)/p-1	BKAJNAXTPSGJCU-UHFFFAOYSA-M	CHEBI:17865	SBO:0000247
34	ahcys[c]	S-Adenosyl-L-homocysteine	C00021	cpd00019	C14H20N6O5S	0	ADENOSYL-HOMO-CYS	ahcys_c	HMDB00939	MNXM19	25246222	[]	InChI=1S/C14H20N6O5S/c15-6(14(23)24)1-2-26-3-7-9(21)10(22)13(25-7)20-5-19-8-11(16)17-4-18-12(8)20/h4-7,9-10,13,21-22H,1-3,15H2,(H,23,24)(H2,16,17,18)/t6-,7+,9+,10+,13+/m0/s1	ZJUKTBDSGOFHSH-WFMPWKQPSA-N	CHEBI:57856	SBO:0000247
35	hcys__L[c]	L-Homocysteine	C00155	cpd00135	C4H9NO2S	0	HOMO-CYS	hcys__L_c	HMDB00742	MNXM123	6971015	174369	InChI=1S/C4H9NO2S/c5-3(1-2-8)4(6)7/h3,8H,1-2,5H2,(H,6,7)/t3-/m0/s1	FFFHZYDWPBMWHY-VKHMYHEASA-N	CHEBI:58199	SBO:0000247
36	adn[c]	Adenosine	C00212	cpd00182	C10H13N5O4	0	ADENOSINE	adn_c	HMDB00050	MNXM212	60961	[]	InChI=1S/C10H13N5O4/c11-8-5-9(13-2-12-8)15(3-14-5)10-7(18)6(17)4(1-16)19-10/h2-4,6-7,10,16-18H,1H2,(H2,11,12,13)/t4-,6-,7-,10-/m1/s1	OIRDTQYFTABQOQ-KQYNXXCUSA-N	CHEBI:16335	SBO:0000247
37	ac[c]	Acetate	C00033	cpd00029	C2H3O2	-1	ACET	ac_c	HMDB00042	MNXM26	175	[]	InChI=1S/C2H4O2/c1-2(3)4/h1H3,(H,3,4)/p-1	QTBSBXVTEAMEQO-UHFFFAOYSA-M	CHEBI:30089	SBO:0000247
38	dmbzid[c]	5,6-Dimethylbenzimidazole	C03114	cpd01997	C9H10N2	0	DIMETHYLBENZIMIDAZOLE	dmbzid_c	HMDB03701	MNXM1531	675	[]	InChI=1S/C9H10N2/c1-6-3-8-9(4-7(6)2)11-5-10-8/h3-5H,1-2H3,(H,10,11)	LJUQGASMPRMWIW-UHFFFAOYSA-N	CHEBI:15890	SBO:0000247
39	nicrnt[c]	Nicotinate D-ribonucleotide	C01185	cpd00873	C11H13NO9P	-1	NICOTINATE_NUCLEOTIDE	nicrnt_c	HMDB01132	MNXM194	46878382	[]	InChI=1S/C11H14NO9P/c13-8-7(5-20-22(17,18)19)21-10(9(8)14)12-3-1-2-6(4-12)11(15)16/h1-4,7-10,13-14H,5H2,(H2-,15,16,17,18,19)/p-2/t7-,8-,9-,10-/m1/s1	JOUIQRNQJGXQDC-ZYUZMQFOSA-L	CHEBI:57502	SBO:0000247
40	5prdmbz[c]	N1-(5-Phospho-alpha-D-ribosyl)-5,6-dimethylbenzimidazole	C04778	cpd02904	C14H18N2O7P	-1	ALPHA-RIBAZOLE-5-P	5prdmbz_c	HMDB03882	MNXM1224	49791947	[]	InChI=1S/C14H19N2O7P/c1-7-3-9-10(4-8(7)2)16(6-15-9)14-13(18)12(17)11(23-14)5-22-24(19,20)21/h3-4,6,11-14,17-18H,5H2,1-2H3,(H2,19,20,21)/p-2/t11-,12-,13-,14+/m1/s1	ZMRGXEJKZPRBPJ-SYQHCUMBSA-L	CHEBI:57918	SBO:0000247
41	nac[c]	Nicotinate	C00253	cpd00218	C6H4NO2	-1	NIACINE	nac_c	HMDB01488	MNXM274	937	[]	InChI=1S/C6H5NO2/c8-6(9)5-2-1-3-7-4-5/h1-4H,(H,8,9)/p-1	PVNIIMVLHYAWGP-UHFFFAOYSA-M	CHEBI:32544	SBO:0000247
42	orot5p[c]	Orotidine 5-phosphate	C01103	cpd00810	C10H11N2O11P	-2	OROTIDINE-5-PHOSPHATE	orot5p_c	HMDB00218	MNXM519	46878393	111629	InChI=1S/C10H13N2O11P/c13-5-1-3(9(16)17)12(10(18)11-5)8-7(15)6(14)4(23-8)2-22-24(19,20)21/h1,4,6-8,14-15H,2H2,(H,16,17)(H,11,13,18)(H2,19,20,21)/p-3/t4-,6-,7-,8-/m1/s1	KYOBSHFOBAOFBF-XVFCMESISA-K	CHEBI:57538	SBO:0000247
43	orot[c]	Orotate	C00295	cpd00247	C5H3N2O4	-1	OROTATE	orot_c	HMDB00226	MNXM235	1492348	76632	InChI=1S/C5H4N2O4/c8-3-1-2(4(9)10)6-5(11)7-3/h1H,(H,9,10)(H2,6,7,8,11)/p-1	PXQPEWDEAKTCGB-UHFFFAOYSA-M	CHEBI:30839	SBO:0000247
44	3htdcoa[c]	(S)-3-Hydroxytetradecanoyl-CoA	C05260	cpd03115	C35H59N7O18P3S	-3	CPD0-2171	3htdcoa_c	HMDB03934	MNXM767	46173488	77276	InChI=1S/C35H62N7O18P3S/c1-4-5-6-7-8-9-10-11-12-13-23(43)18-26(45)64-17-16-37-25(44)14-15-38-33(48)30(47)35(2,3)20-57-63(54,55)60-62(52,53)56-19-24-29(59-61(49,50)51)28(46)34(58-24)42-22-41-27-31(36)39-21-40-32(27)42/h21-24,28-30,34,43,46-47H,4-20H2,1-3H3,(H,37,44)(H,38,48)(H,52,53)(H,54,55)(H2,36,39,40)(H2,49,50,51)/p-4/t23-,24+,28+,29+,30-,34+/m0/s1	OXBHKMHNDGRDCZ-STLSENOWSA-J	CHEBI:62614	SBO:0000247
45	3otdcoa[c]	3-Oxotetradecanoyl-CoA	C05261	cpd12689	C35H57N7O18P3S	-3	CPD-10284	3otdcoa_c	HMDB03935	MNXM707	25245316	77269	InChI=1S/C35H60N7O18P3S/c1-4-5-6-7-8-9-10-11-12-13-23(43)18-26(45)64-17-16-37-25(44)14-15-38-33(48)30(47)35(2,3)20-57-63(54,55)60-62(52,53)56-19-24-29(59-61(49,50)51)28(46)34(58-24)42-22-41-27-31(36)39-21-40-32(27)42/h21-22,24,28-30,34,46-47H,4-20H2,1-3H3,(H,37,44)(H,38,48)(H,52,53)(H,54,55)(H2,36,39,40)(H2,49,50,51)/p-4/t24-,28-,29-,30+,34-/m1/s1	IQNFBGHLIVBNOU-QSGBVPJFSA-J	CHEBI:62543	SBO:0000247
46	ser__L[c]	L-Serine	C00065	cpd00054	C3H7NO3	0	SER	ser__L_c	HMDB00187	[]	6857581	[]	InChI=1S/C3H7NO3/c4-2(1-5)3(6)7/h2,5H,1,4H2,(H,6,7)/t2-/m0/s1	MTCFGRXMJLQNBG-REOHCLBHSA-N	CHEBI:33384	SBO:0000247
47	cyst__L[c]	L-Cystathionine	C02291	cpd00424	C7H14N2O4S	0	L-CYSTATHIONINE	cyst__L_c	HMDB00099	MNXM319	25243997	1614518	InChI=1S/C7H14N2O4S/c8-4(6(10)11)1-2-14-3-5(9)7(12)13/h4-5H,1-3,8-9H2,(H,10,11)(H,12,13)/t4-,5-/m0/s1	ILRYLPWNYFXEMH-WHFBIAKZSA-N	CHEBI:58161	SBO:0000247
48	o2[c]	O2	C00007	cpd00007	O2	0	OXYGEN-MOLECULE	o2_c	HMDB01377	MNXM4	977	[]	InChI=1S/O2/c1-2	MYMOFIZGZYHOMD-UHFFFAOYSA-N	CHEBI:15379	SBO:0000247
49	thbpt[c]	Tetrahydrobiopterin	C00272	cpd00233	C9H15N5O3	0	TETRA-H-BIOPTERIN	thbpt_c	HMDB00027	[]	135409384	[]	InChI=1S/C9H15N5O3/c1-3(15)6(16)4-2-11-7-5(12-4)8(17)14-9(10)13-7/h3-4,6,12,15-16H,2H2,1H3,(H4,10,11,13,14,17)/t3?,4-,6?/m1/s1	FNKQXYHWGSIFBK-NHTYNGABSA-N	CHEBI:136570	SBO:0000247
50	phe__L[c]	L-Phenylalanine	C00079	cpd00066	C9H11NO2	0	PHE	phe__L_c	HMDB00159	MNXM97	6925665	[]	InChI=1S/C9H11NO2/c10-8(9(11)12)6-7-4-2-1-3-5-7/h1-5,8H,6,10H2,(H,11,12)/t8-/m0/s1	COLNVLDHVKWLRT-QMMMGPOBSA-N	CHEBI:58095	SBO:0000247
51	tyr__L[c]	L-Tyrosine	C00082	cpd00069	C9H11NO3	0	TYR	tyr__L_c	HMDB00158	MNXM76	6942100	[]	InChI=1S/C9H11NO3/c10-8(9(12)13)5-6-1-3-7(11)4-2-6/h1-4,8,11H,5,10H2,(H,12,13)/t8-/m0/s1	OUYCCCASQSFEME-QMMMGPOBSA-N	CHEBI:58315	SBO:0000247
52	dhbpt[c]	6,7-Dihydrobiopterin	C00268	cpd00231	C9H13N5O3	0	CPD-15159	dhbpt_c	HMDB02215	MNXM162257	6323351	71129	InChI=1S/C9H13N5O3/c1-3(15)6(16)4-2-11-7-5(12-4)8(17)14-9(10)13-7/h3-4,6,15-16H,2H2,1H3,(H3,10,11,13,14,17)/t3-,4+,6-/m0/s1	ZHQJVZLJDXWFFX-RPDRRWSUSA-N	CHEBI:43120	SBO:0000247
53	xu5p__D[c]	D-Xylulose 5-phosphate	C00231	cpd00198	C5H10O8P	-1	XYLULOSE-5-PHOSPHATE	xu5p__D_c	HMDB00868	MNXM186	5459820	29790	InChI=1S/C5H11O8P/c6-1-3(7)5(9)4(8)2-13-14(10,11)12/h4-6,8-9H,1-2H2,(H2,10,11,12)/p-2/t4-,5-/m1/s1	FNZLKVNUWIIPSJ-RFZPGFLSSA-L	CHEBI:57737	SBO:0000247
54	r5p[c]	alpha-D-Ribose 5-phosphate	C03736	cpd19028	C5H10O8P	-1	CPD-15318	r5p_c	[]	MNXM15900	7098640	[]	InChI=1S/C5H11O8P/c6-3-2(1-12-14(9,10)11)13-5(8)4(3)7/h2-8H,1H2,(H2,9,10,11)/p-2/t2-,3-,4-,5+/m1/s1	KTVPXOYAKDPRHY-AIHAYLRMSA-L	CHEBI:140679	SBO:0000247
55	g3p[c]	Glyceraldehyde 3-phosphate	C00118	cpd00102	C3H6O6P	-1	GAP	g3p_c	HMDB01112	MNXM74	24794350	29578	InChI=1S/C3H7O6P/c4-1-3(5)2-9-10(6,7)8/h1,3,5H,2H2,(H2,6,7,8)/p-2/t3-/m0/s1	LXJXRIRHZLFYRP-VKHMYHEASA-L	CHEBI:59776	SBO:0000247
56	s7p[c]	Sedoheptulose 7-phosphate	C05382	cpd00238	C7H14O10P	-1	D-SEDOHEPTULOSE-7-P	s7p_c	HMDB01068	MNXM271	46878379	29882	InChI=1S/C7H15O10P/c8-1-3(9)5(11)7(13)6(12)4(10)2-17-18(14,15)16/h4-8,10-13H,1-2H2,(H2,14,15,16)/p-2/t4-,5-,6-,7+/m1/s1	JDTUMPKOJBQPKX-GBNDHIKLSA-L	CHEBI:57483	SBO:0000247
57	csn[c]	Cytosine	C00380	cpd00307	C4H5N3O	0	CYTOSINE	csn_c	HMDB00630	MNXM761	597	[]	InChI=1S/C4H5N3O/c5-3-1-2-6-4(8)7-3/h1-2H,(H3,5,6,7,8)	OPTASPLRGRRNAP-UHFFFAOYSA-N	CHEBI:16040	SBO:0000247
58	3c2hmp[c]	(2R,3S)-3-Isopropylmalate	C04411	cpd02693	C7H10O5	-2	2-D-THREO-HYDROXY-3-CARBOXY-ISOCAPROATE	3c2hmp_c	HMDB12156	MNXM891	6857402	[]	InChI=1S/C7H12O5/c1-3(2)4(6(9)10)5(8)7(11)12/h3-5,8H,1-2H3,(H,9,10)(H,11,12)/p-2/t4-,5+/m0/s1	RNQHMTFBUSSBJQ-CRCLSJGQSA-L	CHEBI:35121	SBO:0000247
59	dgtp[c]	dGTP	C00286	cpd00241	C10H13N5O13P3	-3	DGTP	dgtp_c	HMDB01440	MNXM344	25246112	[]	InChI=1S/C10H16N5O13P3/c11-10-13-8-7(9(17)14-10)12-3-15(8)6-1-4(16)5(26-6)2-25-30(21,22)28-31(23,24)27-29(18,19)20/h3-6,16H,1-2H2,(H,21,22)(H,23,24)(H2,18,19,20)(H3,11,13,14,17)/p-4/t4-,5+,6+/m0/s1	HAAZLUGHYHWQIW-KVQBGUIXSA-J	CHEBI:61429	SBO:0000247
60	pppi[c]	triphosphate	C00536	cpd00421	HO10P3	-4	P3I	pppi_c	HMDB03379	MNXM332	3440921	[]	InChI=1S/H5O10P3/c1-11(2,3)9-13(7,8)10-12(4,5)6/h(H,7,8)(H2,1,2,3)(H2,4,5,6)/p-4	UNXRWKVEANCORM-UHFFFAOYSA-J	CHEBI:18036	SBO:0000247
61	dgsn[c]	Deoxyguanosine	C00330	cpd00277	C10H13N5O4	0	DEOXYGUANOSINE	dgsn_c	HMDB00085	MNXM647	187790	[]	InChI=1S/C10H13N5O4/c11-10-13-8-7(9(18)14-10)12-3-15(8)6-1-4(17)5(2-16)19-6/h3-6,16-17H,1-2H2,(H3,11,13,14,18)/t4-,5+,6+/m0/s1	YKBGVTZYEHREMT-KVQBGUIXSA-N	CHEBI:17172	SBO:0000247
62	d5kg[c]	2-Deoxy-5-keto-D-gluconic acid	C06892	cpd04242	C6H9O6	-1	CPD-827	d5kg_c	[]	MNXM1897	6857389	[]	InChI=1S/C6H10O6/c7-2-4(9)6(12)3(8)1-5(10)11/h3,6-8,12H,1-2H2,(H,10,11)/p-1/t3-,6+/m1/s1	UCYNJPYWOSFBAT-CVYQJGLWSA-M	CHEBI:16669	SBO:0000247
63	adp[c]	ADP	C00008	cpd00008	C10H13N5O10P2	-2	ADP	adp_c	HMDB01341	MNXM7	7058055	[]	InChI=1S/C10H15N5O10P2/c11-8-5-9(13-2-12-8)15(3-14-5)10-7(17)6(16)4(24-10)1-23-27(21,22)25-26(18,19)20/h2-4,6-7,10,16-17H,1H2,(H,21,22)(H2,11,12,13)(H2,18,19,20)/p-3/t4-,6-,7-,10-/m1/s1	XTWYTFMLZFPYCI-KQYNXXCUSA-K	CHEBI:456216	SBO:0000247
64	d5kgp[c]	2-Deoxy-5-keto-D-gluconic acid 6-phosphate	C06893	cpd02721	C6H9O9P	-2	CPD-645	d5kgp_c	[]	MNXM1806	49791953	[]	InChI=1S/C6H11O9P/c7-3(1-5(9)10)6(11)4(8)2-15-16(12,13)14/h3,6-7,11H,1-2H2,(H,9,10)(H2,12,13,14)/p-3/t3-,6+/m1/s1	OLUPOJQIFXQXIT-CVYQJGLWSA-K	CHEBI:57949	SBO:0000247
65	gdp[c]	GDP	C00035	cpd00031	C10H13N5O11P2	-2	GDP	gdp_c	HMDB01201	MNXM30	21604868	[]	InChI=1S/C10H15N5O11P2/c11-10-13-7-4(8(18)14-10)12-2-15(7)9-6(17)5(16)3(25-9)1-24-28(22,23)26-27(19,20)21/h2-3,5-6,9,16-17H,1H2,(H,22,23)(H2,19,20,21)(H3,11,13,14,18)/p-3/t3-,5-,6-,9-/m1/s1	QGWNDRXFNXRZMB-UUOKFMHZSA-K	CHEBI:58189	SBO:0000247
66	gtp[c]	GTP	C00044	cpd00038	C10H13N5O14P3	-3	GTP	gtp_c	HMDB01273	MNXM51	7058167	[]	InChI=1S/C10H16N5O14P3/c11-10-13-7-4(8(18)14-10)12-2-15(7)9-6(17)5(16)3(27-9)1-26-31(22,23)29-32(24,25)28-30(19,20)21/h2-3,5-6,9,16-17H,1H2,(H,22,23)(H,24,25)(H2,19,20,21)(H3,11,13,14,18)/p-4/t3-,5-,6-,9-/m1/s1	XKMLYUALXHKNFT-UUOKFMHZSA-J	CHEBI:37565	SBO:0000247
67	dcdp[c]	dCDP	C00705	cpd00533	C9H13N3O10P2	-2	DCDP	dcdp_c	HMDB01245	MNXM411	21122964	[]	InChI=1S/C9H15N3O10P2/c10-7-1-2-12(9(14)11-7)8-3-5(13)6(21-8)4-20-24(18,19)22-23(15,16)17/h1-2,5-6,8,13H,3-4H2,(H,18,19)(H2,10,11,14)(H2,15,16,17)/p-3/t5-,6+,8+/m0/s1	FTDHDKPUHBLBTL-SHYZEUOFSA-K	CHEBI:58593	SBO:0000247
68	dctp[c]	dCTP	C00458	cpd00356	C9H13N3O13P3	-3	DCTP	dctp_c	HMDB00998	MNXM360	25244665	[]	InChI=1S/C9H16N3O13P3/c10-7-1-2-12(9(14)11-7)8-3-5(13)6(23-8)4-22-27(18,19)25-28(20,21)24-26(15,16)17/h1-2,5-6,8,13H,3-4H2,(H,18,19)(H,20,21)(H2,10,11,14)(H2,15,16,17)/p-4/t5-,6+,8+/m0/s1	RGWHQCVHVJXOKC-SHYZEUOFSA-J	CHEBI:61481	SBO:0000247
69	qh2[c]	Ubiquinol	C00390	cpd11665	C19H28O4	0	Ubiquinols	qh2_c	[]	MNXM202	[]	[]	[]	[]	CHEBI:17976	SBO:0000247
70	q[c]	Ubiquinone	C00399	cpd11669	C19H26O4	0	Ubiquinones	q_c	[]	MNXM176	[]	[]	[]	[]	CHEBI:16389	SBO:0000247
71	h[e]	H+	C00080	cpd00067	H	1	PROTON	h_e	HMDB59597	MNXM1	1038	[]	InChI=1S/p+1	GPRLSGONYQIRFK-UHFFFAOYSA-N	CHEBI:15378	SBO:0000247
72	4pasp[c]	4-Phospho-L-aspartate	C03082	cpd01977	C4H7NO7P	-1	L-BETA-ASPARTYL-P	4pasp_c	HMDB12250	MNXM1177	11948925	[]	InChI=1S/C4H8NO7P/c5-2(4(7)8)1-3(6)12-13(9,10)11/h2H,1,5H2,(H,7,8)(H2,9,10,11)/p-2/t2-/m0/s1	IXZNKTPIYKDIGG-REOHCLBHSA-L	CHEBI:57535	SBO:0000247
73	aspsa[c]	L-Aspartate 4-semialdehyde	C00441	cpd00346	C4H7NO3	0	L-ASPARTATE-SEMIALDEHYDE	aspsa_c	HMDB12249	MNXM361	5287708	[]	InChI=1S/C4H7NO3/c5-3(1-2-6)4(7)8/h2-3H,1,5H2,(H,7,8)/t3-/m0/s1	HOSWPDPVFBCLSY-VKHMYHEASA-N	CHEBI:537519	SBO:0000247
74	10fthf[c]	10-Formyltetrahydrofolate	C00234	cpd00201	C20H21N7O7	-2	10-FORMYL-THF	10fthf_c	HMDB00972	MNXM237	46878370	[]	InChI=1S/C20H23N7O7/c21-20-25-16-15(18(32)26-20)23-11(7-22-16)8-27(9-28)12-3-1-10(2-4-12)17(31)24-13(19(33)34)5-6-14(29)30/h1-4,9,11,13,23H,5-8H2,(H,24,31)(H,29,30)(H,33,34)(H4,21,22,25,26,32)/p-2/t11-,13+/m1/s1	AUFGTPPARQZWDO-YPMHNXCESA-L	CHEBI:57454	SBO:0000247
75	thf[c]	5,6,7,8-Tetrahydrofolate	C00101	cpd00087	C19H21N7O6	-2	THF	thf_c	HMDB01846	MNXM79	25790919	[]	InChI=1S/C19H23N7O6/c20-19-25-15-14(17(30)26-19)23-11(8-22-15)7-21-10-3-1-9(2-4-10)16(29)24-12(18(31)32)5-6-13(27)28/h1-4,11-12,21,23H,5-8H2,(H,24,29)(H,27,28)(H,31,32)(H4,20,22,25,26,30)/p-2/t11-,12-/m0/s1	MSTNYGQPCMXVAQ-RYUDHWBXSA-L	CHEBI:57453	SBO:0000247
76	for[c]	Formate	C00058	cpd00047	CHO2	-1	FORMATE	for_c	HMDB00142	[]	283	[]	InChI=1S/CH2O2/c2-1-3/h1H,(H,2,3)/p-1	BDAGIHXWWSANSR-UHFFFAOYSA-M	CHEBI:15740	SBO:0000247
77	ru5p__D[c]	D-Ribulose 5-phosphate	C00199	cpd00171	C5H10O8P	-1	RIBULOSE-5P	ru5p__D_c	HMDB00618	MNXM145	21144996	29732	InChI=1S/C5H11O8P/c6-1-3(7)5(9)4(8)2-13-14(10,11)12/h4-6,8-9H,1-2H2,(H2,10,11,12)/p-2/t4-,5+/m1/s1	FNZLKVNUWIIPSJ-UHNVWZDZSA-L	CHEBI:58121	SBO:0000247
78	cdp[c]	CDP	C00112	cpd00096	C9H13N3O11P2	-2	CDP	cdp_c	HMDB01546	MNXM220	20056867	[]	InChI=1S/C9H15N3O11P2/c10-5-1-2-12(9(15)11-5)8-7(14)6(13)4(22-8)3-21-25(19,20)23-24(16,17)18/h1-2,4,6-8,13-14H,3H2,(H,19,20)(H2,10,11,15)(H2,16,17,18)/p-3/t4-,6-,7-,8-/m1/s1	ZWIADYZPOWUWEW-XVFCMESISA-K	CHEBI:58069	SBO:0000247
79	trdrd[c]	Reduced thioredoxin	C00342	cpd11421	H2R	0	[]	trdrd_c	[]	[]	[]	[]	[]	[]	CHEBI:15033	SBO:0000247
80	trdox[c]	Oxidized thioredoxin	C00343	cpd11420	R	0	OX-THIOREDOXIN-MONOMER	trdox_c	[]	[]	[]	[]	[]	[]	CHEBI:18191	SBO:0000247
81	3hdcoa[c]	(S)-3-Hydroxydecanoyl-CoA	C05264	cpd03118	C31H51N7O18P3S	-3	CPD0-2244	3hdcoa_c	HMDB03938	MNXM674	49859629	77341	InChI=1S/C31H54N7O18P3S/c1-4-5-6-7-8-9-19(39)14-22(41)60-13-12-33-21(40)10-11-34-29(44)26(43)31(2,3)16-53-59(50,51)56-58(48,49)52-15-20-25(55-57(45,46)47)24(42)30(54-20)38-18-37-23-27(32)35-17-36-28(23)38/h17-20,24-26,30,39,42-43H,4-16H2,1-3H3,(H,33,40)(H,34,44)(H,48,49)(H,50,51)(H2,32,35,36)(H2,45,46,47)/p-4/t19-,20+,24+,25+,26-,30+/m0/s1	HIVSMYZAMUNFKZ-PNPVFPMQSA-J	CHEBI:62616	SBO:0000247
82	dc2coa[c]	trans-Dec-2-enoyl-CoA	C05275	cpd03129	C31H49N7O17P3S	-3	T2-DECENOYL-COA	dc2coa_c	HMDB03948	MNXM580	50909850	77343	InChI=1S/C31H52N7O17P3S/c1-4-5-6-7-8-9-10-11-22(40)59-15-14-33-21(39)12-13-34-29(43)26(42)31(2,3)17-52-58(49,50)55-57(47,48)51-16-20-25(54-56(44,45)46)24(41)30(53-20)38-19-37-23-27(32)35-18-36-28(23)38/h10-11,18-20,24-26,30,41-42H,4-9,12-17H2,1-3H3,(H,33,39)(H,34,43)(H,47,48)(H,49,50)(H2,32,35,36)(H2,44,45,46)/p-4/b11-10+/t20-,24-,25-,26+,30-/m1/s1	MGNBGCRQQFMNBM-YJHHLLFWSA-J	CHEBI:61406	SBO:0000247
83	asp__L[c]	L-Aspartate	C00049	cpd00041	C4H6NO4	-1	L-ASPARTATE	asp__L_c	HMDB00191	MNXM42	5460294	[]	InChI=1S/C4H7NO4/c5-2(4(8)9)1-3(6)7/h2H,1,5H2,(H,6,7)(H,8,9)/p-1/t2-/m0/s1	CKLJMWTZIZZHCS-REOHCLBHSA-M	CHEBI:29991	SBO:0000247
84	fum[c]	Fumarate	C00122	cpd00106	C4H2O4	-2	FUM	fum_c	HMDB00134	MNXM93	5460307	[]	InChI=1S/C4H4O4/c5-3(6)1-2-4(7)8/h1-2H,(H,5,6)(H,7,8)/p-2/b2-1+	VZCYOOQTPOCHFL-OWOJBTEDSA-L	CHEBI:29806	SBO:0000247
85	glu5sa[c]	L-Glutamate 5-semialdehyde	C01165	cpd00858	C5H9NO3	0	L-GLUTAMATE_GAMMA-SEMIALDEHYDE	glu5sa_c	HMDB02104	MNXM245	49791979	31339	InChI=1S/C5H9NO3/c6-4(5(8)9)2-1-3-7/h3-4H,1-2,6H2,(H,8,9)/t4-/m0/s1	KABXUUFDPUOJMW-BYPYZUCNSA-N	CHEBI:58066	SBO:0000247
86	1pyr5c[c]	1-Pyrroline-5-carboxylate	C03912	cpd02431	C5H6NO2	-1	L-DELTA1-PYRROLINE_5-CARBOXYLATE	1pyr5c_c	HMDB01301	MNXM1617	11966181	[]	InChI=1S/C5H7NO2/c7-5(8)4-2-1-3-6-4/h3-4H,1-2H2,(H,7,8)/p-1/t4-/m0/s1	DWAKNKKXGALPNW-BYPYZUCNSA-M	CHEBI:17388	SBO:0000247
87	dxyl5p[c]	1-deoxy-D-xylulose 5-phosphate	C11437	cpd08289	C5H10O7P	-1	DEOXYXYLULOSE-5P	dxyl5p_c	HMDB01213	MNXM622	23420274	[]	InChI=1S/C5H11O7P/c1-3(6)5(8)4(7)2-12-13(9,10)11/h4-5,7-8H,2H2,1H3,(H2,9,10,11)/p-2/t4-,5-/m1/s1	AJPADPZSRRUGHI-RFZPGFLSSA-L	CHEBI:57792	SBO:0000247
88	2me4p[c]	2-C-methyl-D-erythritol 4-phosphate	C11434	cpd08286	C5H12O7P	-1	2-C-METHYL-D-ERYTHRITOL-4-PHOSPHATE	2me4p_c	[]	MNXM1626	21608483	[]	InChI=1S/C5H13O7P/c1-5(8,3-6)4(7)2-12-13(9,10)11/h4,6-8H,2-3H2,1H3,(H2,9,10,11)/p-2/t4-,5+/m1/s1	XMWHRVNVKDKBRG-UHNVWZDZSA-L	CHEBI:58262	SBO:0000247
89	mal__L[e]	L-Malate	C00149	cpd00130	C4H4O5	-2	MAL	mal__L_e	HMDB00156	MNXM98	5459792	[]	InChI=1S/C4H6O5/c5-2(4(8)9)1-3(6)7/h2,5H,1H2,(H,6,7)(H,8,9)/p-2/t2-/m0/s1	BJEPYKJPYRNKOW-REOHCLBHSA-L	CHEBI:15589	SBO:0000247
90	mal__L[c]	L-Malate	C00149	cpd00130	C4H4O5	-2	MAL	mal__L_c	HMDB00156	MNXM98	5459792	[]	InChI=1S/C4H6O5/c5-2(4(8)9)1-3(6)7/h2,5H,1H2,(H,6,7)(H,8,9)/p-2/t2-/m0/s1	BJEPYKJPYRNKOW-REOHCLBHSA-L	CHEBI:15589	SBO:0000247
91	cbi[c]	Cobinamide	C05774	cpd03422	C48H73N11O8Co	3	COBINAMIDE	cbi_c	HMDB06902	MNXM1549	91820010	[]	InChI=1S/C48H73N11O8.Co/c1-23(60)22-55-38(67)16-17-45(6)29(18-35(52)64)43-48(9)47(8,21-37(54)66)28(12-15-34(51)63)40(59-48)25(3)42-46(7,20-36(53)65)26(10-13-32(49)61)30(56-42)19-31-44(4,5)27(11-14-33(50)62)39(57-31)24(2)41(45)58-43;/h19,23,26-29,43,60H,10-18,20-22H2,1-9H3,(H14,49,50,51,52,53,54,55,56,57,58,59,61,62,63,64,65,66,67);/q;+1/p-1/t23-,26-,27-,28-,29+,43-,45-,46+,47+,48+;/m1./s1	XQRJFEVDQXEIAX-JFYQDRLCSA-M	CHEBI:28956	SBO:0000247
92	adocbi[c]	Adenosyl cobinamide	C06508	cpd03918	C58H85N16O11Co	2	ADENOSYLCOBINAMIDE	adocbi_c	HMDB06903	MNXM90790	91819767	[]	InChI=1S/C48H73N11O8.C10H12N5O3.Co/c1-23(60)22-55-38(67)16-17-45(6)29(18-35(52)64)43-48(9)47(8,21-37(54)66)28(12-15-34(51)63)40(59-48)25(3)42-46(7,20-36(53)65)26(10-13-32(49)61)30(56-42)19-31-44(4,5)27(11-14-33(50)62)39(57-31)24(2)41(45)58-43;1-4-6(16)7(17)10(18-4)15-3-14-5-8(11)12-2-13-9(5)15;/h19,23,26-29,43,60H,10-18,20-22H2,1-9H3,(H14,49,50,51,52,53,54,55,56,57,58,59,61,62,63,64,65,66,67);2-4…	KQXSPGAEBZWHMC-QMUWONGRSA-M	CHEBI:2480	SBO:0000247
93	3ig3p[c]	C-(3-Indolyl)-glycerol 3-phosphate	C03506	cpd02210	C11H13NO6P	-1	INDOLE-3-GLYCEROL-P	3ig3p_c	[]	MNXM866	46878464	[]	InChI=1S/C11H14NO6P/c13-10(6-18-19(15,16)17)11(14)8-5-12-9-4-2-1-3-7(8)9/h1-5,10-14H,6H2,(H2,15,16,17)/p-2/t10-,11+/m1/s1	NQEQTYPJSIEPHW-MNOVXSKESA-L	CHEBI:58866	SBO:0000247
94	indole[c]	Indole	C00463	cpd00359	C8H7N	0	INDOLE	indole_c	HMDB00738	MNXM377	798	216547	InChI=1S/C8H7N/c1-2-4-8-7(3-1)5-6-9-8/h1-6,9H	SIKJAQJRHWYJAI-UHFFFAOYSA-N	CHEBI:16881	SBO:0000247
95	3mop[c]	(S)-3-Methyl-2-oxopentanoate	C00671	cpd00508	C6H9O3	-1	2-KETO-3-METHYL-VALERATE	3mop_c	HMDB00491	MNXM439	6857401	[]	InChI=1S/C6H10O3/c1-3-4(2)5(7)6(8)9/h4H,3H2,1-2H3,(H,8,9)/p-1/t4-/m0/s1	JVQYSWDUAOAHFM-BYPYZUCNSA-M	CHEBI:35146	SBO:0000247
96	akg[c]	2-Oxoglutarate	C00026	cpd00024	C5H4O5	-2	2-KETOGLUTARATE	akg_c	HMDB00208	MNXM20	164533	[]	InChI=1S/C5H6O5/c6-3(5(9)10)1-2-4(7)8/h1-2H2,(H,7,8)(H,9,10)/p-2	KPGXRSRHYNQIFN-UHFFFAOYSA-L	CHEBI:16810	SBO:0000247
97	ile__L[c]	L-Isoleucine	C00407	cpd00322	C6H13NO2	0	ILE	ile__L_c	HMDB00172	MNXM231	7043901	[]	InChI=1S/C6H13NO2/c1-3-4(2)5(7)6(8)9/h4-5H,3,7H2,1-2H3,(H,8,9)/t4-,5-/m0/s1	AGPKZVBTJJNPAG-WHFBIAKZSA-N	CHEBI:58045	SBO:0000247
98	2dda7p[c]	2-Dehydro-3-deoxy-D-arabino-heptonate 7-phosphate	C04691	cpd02857	C7H11O10P	-2	3-DEOXY-D-ARABINO-HEPTULOSONATE-7-P	2dda7p_c	[]	MNXM1219	5460215	964909	InChI=1S/C7H13O10P/c8-3(1-4(9)7(12)13)6(11)5(10)2-17-18(14,15)16/h3,5-6,8,10-11H,1-2H2,(H,12,13)(H2,14,15,16)/p-3/t3-,5-,6+/m1/s1	PJWIPEXIFFQAQZ-PUFIMZNGSA-K	CHEBI:58394	SBO:0000247
99	3dhq[c]	3-Dehydroquinate	C00944	cpd00699	C7H9O6	-1	DEHYDROQUINATE	3dhq_c	HMDB12710	MNXM478	5460271	964921	InChI=1S/C7H10O6/c8-3-1-7(13,6(11)12)2-4(9)5(3)10/h3,5,8,10,13H,1-2H2,(H,11,12)/p-1/t3-,5+,7-/m1/s1	WVMWZWGZRAXUBK-SYTVJDICSA-M	CHEBI:32364	SBO:0000247
100	pyr[c]	Pyruvate	C00022	cpd00020	C3H3O3	-1	PYRUVATE	pyr_c	HMDB00243	MNXM23	107735	[]	InChI=1S/C3H4O3/c1-2(4)3(5)6/h1H3,(H,5,6)/p-1	LCTONWCANYUPML-UHFFFAOYSA-M	CHEBI:15361	SBO:0000247
101	trp__L[c]	L-Tryptophan	C00078	cpd00065	C11H12N2O2	0	TRP	trp__L_c	HMDB00929	MNXM94	6923516	[]	InChI=1S/C11H12N2O2/c12-9(11(14)15)5-7-6-13-10-4-2-1-3-8(7)10/h1-4,6,9,13H,5,12H2,(H,14,15)/t9-/m0/s1	QIVBCDIJIAJPQS-VIFPVBQESA-N	CHEBI:57912	SBO:0000247
102	adhlam[c]	S-Acetyldihydrolipoamide	C01136	cpd00836	C10H19NO2S2	0	S-ACETYLDIHYDROLIPOAMIDE	adhlam_c	HMDB01526	MNXM4815	1076	[]	InChI=1S/C10H19NO2S2/c1-8(12)15-9(6-7-14)4-2-3-5-10(11)13/h9,14H,2-7H2,1H3,(H2,11,13)	ARGXEXVCHMNAQU-UHFFFAOYSA-N	CHEBI:16807	SBO:0000247
103	dhlam[c]	Dihydrolipoamide (pyruvate dehydrogenase)	C00579	cpd00449	C8H17NOS2	0	DIHYDROLIPOAMIDE	dhlam_c	HMDB00985	MNXM1277	445160	[]	InChI=1S/C8H17NOS2/c9-8(10)4-2-1-3-7(12)5-6-11/h7,11-12H,1-6H2,(H2,9,10)/t7-/m1/s1	VLYUGYAKYZETRF-SSDOTTSWSA-N	CHEBI:43711	SBO:0000247
104	fdxrd[c]	ferredoxin (reduced) 2[4Fe-4S]	C00138	cpd11620	R	5	Reduced-ferredoxins	fdxrd_c	[]	MNXM169	[]	[]	[]	[]	CHEBI:17513	SBO:0000247
105	fdxox[c]	ferredoxin (oxidized) 2[4Fe-4S]	C00139	cpd11621	R	6	Oxidized-ferredoxins	fdxox_c	[]	MNXM178	[]	[]	[]	[]	CHEBI:17908	SBO:0000247
106	hco3[c]	Carbonic acid	C01353	cpd00242	CHO3	-1	H2CO3	hco3_c	HMDB03538	[]	767	[]	InChI=1S/CH2O3/c2-1(3)4/h(H2,2,3,4)	BVKZGUZCCUSVTD-UHFFFAOYSA-N	CHEBI:28976	SBO:0000247
107	met__L[c]	L-Methionine	C00073	cpd00060	C5H11NO2S	0	MET	met__L_c	HMDB00696	MNXM61	6992087	[]	InChI=1S/C5H11NO2S/c1-9-3-2-4(6)5(7)8/h4H,2-3,6H2,1H3,(H,7,8)/t4-/m0/s1	FFEARJCKVFRZRR-BYPYZUCNSA-N	CHEBI:57844	SBO:0000247
108	amet[c]	S-Adenosyl-L-methionine	C00019	cpd00017	C15H23N6O5S	1	S-ADENOSYLMETHIONINE	amet_c	HMDB01185	MNXM16	24762165	[]	InChI=1S/C15H22N6O5S/c1-27(3-2-7(16)15(24)25)4-8-10(22)11(23)14(26-8)21-6-20-9-12(17)18-5-19-13(9)21/h5-8,10-11,14,22-23H,2-4,16H2,1H3,(H2-,17,18,19,24,25)/p+1/t7-,8+,10+,11+,14+,27-/m0/s1	MEFKEPWMEQBLKI-FCKMPRQPSA-O	CHEBI:59789	SBO:0000247
109	6hmhpt[c]	6-hydroxymethyl dihydropterin	C01300	cpd00954	C7H9N5O2	0	AMINO-OH-HYDROXYMETHYL-DIHYDROPTERIDINE	6hmhpt_c	[]	MNXM937	218	[]	InChI=1S/C7H9N5O2/c8-7-11-5-4(6(14)12-7)10-3(2-13)1-9-5/h13H,1-2H2,(H4,8,9,11,12,14)	CQQNNQTXUGLUEV-UHFFFAOYSA-N	CHEBI:44841	SBO:0000247
110	6hmhptpp[c]	6-hydroxymethyl-dihydropterin pyrophosphate	C04807	cpd02920	C7H9N5O8P2	-2	DIHYDROPTERIN-CH2OH-PP	6hmhptpp_c	[]	MNXM1160	25244074	[]	InChI=1S/C7H11N5O8P2/c8-7-11-5-4(6(13)12-7)10-3(1-9-5)2-19-22(17,18)20-21(14,15)16/h1-2H2,(H,17,18)(H2,14,15,16)(H4,8,9,11,12,13)/p-3	FCQGJGLSOWZZON-UHFFFAOYSA-K	CHEBI:72950	SBO:0000247
111	thr__L[c]	L-Threonine	C00188	cpd00161	C4H9NO3	0	THR	thr__L_c	HMDB00167	MNXM142	6971019	[]	InChI=1S/C4H9NO3/c1-2(6)3(5)4(7)8/h2-3,6H,5H2,1H3,(H,7,8)/t2-,3+/m1/s1	AYFVYJQAPQTCCC-GBXIJSLDSA-N	CHEBI:57926	SBO:0000247
112	2obut[c]	2-Oxobutanoate	C00109	cpd00094	C4H5O3	-1	2-OXOBUTANOATE	2obut_c	HMDB00005	MNXM159	3593277	936714	InChI=1S/C4H6O3/c1-2-3(5)4(6)7/h2H2,1H3,(H,6,7)/p-1	TYEYBOSBBBHJIV-UHFFFAOYSA-M	CHEBI:16763	SBO:0000247
113	6r5au[c]	6-(1-D-Ribitylamino)-5-aminouracil	C04732	cpd02882	C9H16N4O6	0	AMINO-RIBOSYLAMINO-1H-3H-PYR-DIONE	6r5au_c	HMDB11106	MNXM791	193516	[]	InChI=1S/C9H16N4O6/c10-5-7(12-9(19)13-8(5)18)11-1-3(15)6(17)4(16)2-14/h3-4,6,14-17H,1-2,10H2,(H3,11,12,13,18,19)/t3-,4+,6-/m0/s1	XKQZIXVJVUPORE-RPDRRWSUSA-N	CHEBI:15934	SBO:0000247
114	db4p[c]	3,4-dihydroxy-2-butanone 4-phosphate	C15556	cpd11225	C4H8O6P	-1	DIHYDROXY-BUTANONE-P	db4p_c	[]	MNXM164034	90658385	[]	InChI=1S/C4H9O6P/c1-3(5)4(6)2-10-11(7,8)9/h4,6H,2H2,1H3,(H2,7,8,9)/p-2/t4-/m1/s1	OKYHYXLCTGGOLM-SCSAIBSYSA-L	CHEBI:50606	SBO:0000247
115	dmlz[c]	6,7-Dimethyl-8-(1-D-ribityl)lumazine	C04332	cpd02656	C13H18N4O6	0	DIMETHYL-D-RIBITYL-LUMAZINE	dmlz_c	HMDB03826	MNXM1313	46931117	[]	InChI=1S/C13H18N4O6/c1-5-6(2)17(3-7(19)10(21)8(20)4-18)11-9(14-5)12(22)16-13(23)15-11/h7-8,10,18-21H,3-4H2,1-2H3,(H,16,22,23)/p-1/t7-,8+,10-/m0/s1	SXDXRJZUAJBNFL-XKSSXDPKSA-M	CHEBI:58201	SBO:0000247
116	rnam[c]	N-Ribosylnicotinamide	C03150	cpd02016	C11H15N2O5	1	NICOTINAMIDE_RIBOSE	rnam_c	HMDB00855	MNXM1115	439924	[]	InChI=1S/C11H14N2O5/c12-10(17)6-2-1-3-13(4-6)11-9(16)8(15)7(5-14)18-11/h1-4,7-9,11,14-16H,5H2,(H-,12,17)/p+1/t7-,8-,9-,11-/m1/s1	JLEBZPBDRKPWTD-TURQNECASA-O	CHEBI:15927	SBO:0000247
117	ncam[c]	Nicotinamide	C00153	cpd00133	C6H6N2O	0	NIACINAMIDE	ncam_c	HMDB01406	MNXM216	936	[]	InChI=1S/C6H6N2O/c7-6(9)5-2-1-3-8-4-5/h1-4H,(H2,7,9)	DFPAKSUCGFBDDF-UHFFFAOYSA-N	CHEBI:17154	SBO:0000247
118	rib__D[c]	D-Ribose	C00121	cpd00105	C5H10O5	0	RIBOSE	rib__D_c	[]	[]	[]	[]	InChI=1S/C5H10O5/c6-1-3(8)5(10)4(9)2-7/h1,3-5,7-10H,2H2/t3-,4+,5-/m0/s1	PYMYPHUHKUWMLA-LMVFSUKVSA-N	CHEBI:16988	SBO:0000247
119	3hhexACP[c]	(R)-3-Hydroxyhexanoyl-[acyl-carrier protein]	C05747	cpd11479	C17H30N2O8PSR	-1	[]	3hhexACP_c	[]	[]	[]	[]	[]	[]	CHEBI:326	SBO:0000247
120	thex2eACP[c]	trans-Hex-2-enoyl-[acyl-carrier protein]	C05748	cpd11473	C17H28N2O7PSR	-1	Hex-2-enoyl-ACPs	thex2eACP_c	[]	MNXM24502	[]	[]	[]	[]	CHEBI:10727	SBO:0000247
121	n2[e]	nitrogen	C00697	cpd00528	N2	0	NITROGEN-MOLECULE	n2_e	HMDB0001371	MNXM724	947	[]	InChI=1S/N2/c1-2	IJGRMHOSHXDMSA-UHFFFAOYSA-N	CHEBI:17997	SBO:0000247
122	n2[c]	nitrogen	C00697	cpd00528	N2	0	NITROGEN-MOLECULE	n2_c	HMDB0001371	MNXM724	947	[]	InChI=1S/N2/c1-2	IJGRMHOSHXDMSA-UHFFFAOYSA-N	CHEBI:17997	SBO:0000247
123	56dura[c]	5,6-dihydrouracil	C00429	cpd00337	C4H6N2O2	0	DI-H-URACIL	56dura_c	HMDB00076	MNXM506	649	73584	InChI=1S/C4H6N2O2/c7-3-1-2-5-4(8)6-3/h1-2H2,(H2,5,6,7,8)	OIVLITBTBDPEFK-UHFFFAOYSA-N	CHEBI:15901	SBO:0000247
124	cala[c]	N-Carbamoyl-beta-alanine	C02642	cpd01720	C4H7N2O3	-1	3-UREIDO-PROPIONATE	cala_c	HMDB00026	MNXM802	6971254	73588	InChI=1S/C4H8N2O3/c5-4(9)6-2-1-3(7)8/h1-2H2,(H,7,8)(H3,5,6,9)/p-1	JSJWCHRYRHKBBW-UHFFFAOYSA-M	CHEBI:11892	SBO:0000247
125	dhor__S[c]	(S)-Dihydroorotate	C00337	cpd00282	C5H5N2O4	-1	DI-H-OROTATE	dhor__S_c	HMDB00528	MNXM252	5460289	76630	InChI=1S/C5H6N2O4/c8-3-1-2(4(9)10)6-5(11)7-3/h2H,1H2,(H,9,10)(H2,6,7,8,11)/p-1/t2-/m0/s1	UFIVEPVSAGBUSI-REOHCLBHSA-M	CHEBI:30864	SBO:0000247
126	cbasp[c]	N-Carbamoyl-L-aspartate	C00438	cpd00343	C5H6N2O5	-2	CARBAMYUL-L-ASPARTATE	cbasp_c	HMDB00828	MNXM465	5460257	111628	InChI=1S/C5H8N2O5/c6-5(12)7-2(4(10)11)1-3(8)9/h2H,1H2,(H,8,9)(H,10,11)(H3,6,7,12)/p-2/t2-/m0/s1	HLKXYZVTANABHZ-REOHCLBHSA-L	CHEBI:32814	SBO:0000247
127	b2coa[c]	Crotonoyl-CoA	C00877	cpd00650	C25H37N7O17P3S	-3	CROTONYL-COA	b2coa_c	HMDB02009	MNXM214	25245057	[]	InChI=1S/C25H40N7O17P3S/c1-4-5-16(34)53-9-8-27-15(33)6-7-28-23(37)20(36)25(2,3)11-46-52(43,44)49-51(41,42)45-10-14-19(48-50(38,39)40)18(35)24(47-14)32-13-31-17-21(26)29-12-30-22(17)32/h4-5,12-14,18-20,24,35-36H,6-11H2,1-3H3,(H,27,33)(H,28,37)(H,41,42)(H,43,44)(H2,26,29,30)(H2,38,39,40)/p-4/b5-4+/t14-,18-,19-,20+,24-/m1/s1	KFWWCMJSYSSPSK-PAXLJYGASA-J	CHEBI:57332	SBO:0000247
128	56dthm[c]	5,6-Dihydrothymine	C00906	cpd00673	C5H8N2O2	0	DIHYDRO-THYMINE	56dthm_c	HMDB00079	MNXM772	93556	73541	InChI=1S/C5H8N2O2/c1-3-2-6-5(9)7-4(3)8/h3H,2H2,1H3,(H2,6,7,8,9)	NBAKTGXDIBVZOO-UHFFFAOYSA-N	CHEBI:27468	SBO:0000247
129	3uib[c]	3-Ureidoisobutyrate	C05100	cpd03034	C5H9N2O3	-1	3-UREIDO-ISOBUTYRATE	3uib_c	HMDB02031	MNXM163065	91820371	[]	InChI=1S/C5H10N2O3/c1-3(4(8)9)2-7-5(6)10/h3H,2H2,1H3,(H,8,9)(H3,6,7,10)/p-1/t3-/m1/s1	PHENTZNALBMCQD-GSVOUGTGSA-M	CHEBI:74414	SBO:0000247
130	pdx5p[c]	Pyridoxine 5-phosphate	C00627	cpd00478	C8H11NO6P	-1	PYRIDOXINE-5P	pdx5p_c	HMDB01319	MNXM454	24794348	964952	InChI=1S/C8H12NO6P/c1-5-8(11)7(3-10)6(2-9-5)4-15-16(12,13)14/h2,10-11H,3-4H2,1H3,(H2,12,13,14)/p-2	WHOMFKWHIQZTHY-UHFFFAOYSA-L	CHEBI:58589	SBO:0000247
131	pydx5p[c]	Pyridoxal 5-phosphate	C00018	cpd00016	C8H9NO6P	-1	PYRIDOXAL_PHOSPHATE	pydx5p_c	HMDB01491	MNXM161	644168	29390	InChI=1S/C8H10NO6P/c1-5-8(11)7(3-10)6(2-9-5)4-15-16(12,13)14/h2-3,11H,4H2,1H3,(H2,12,13,14)/p-2	NGVDGCNFYWLIFO-UHFFFAOYSA-L	CHEBI:597326	SBO:0000247
132	h2o2[c]	Hydrogen peroxide	C00027	cpd00025	H2O2	0	HYDROGEN-PEROXIDE	h2o2_c	HMDB03125	MNXM22	784	[]	InChI=1S/H2O2/c1-2/h1-2H	MHAJPDPJQMAIIY-UHFFFAOYSA-N	CHEBI:16240	SBO:0000247
133	adocbip[c]	Adenosyl cobinamide phosphate	C06509	cpd03919	C58H84N16O14PCo	0	ADENOSYLCOBINAMIDE-P	adocbip_c	HMDB12184	MNXM856	70678575	[]	InChI=1S/C48H74N11O11P.C10H12N5O3.Co/c1-23(70-71(67,68)69)22-55-38(66)16-17-45(6)29(18-35(52)63)43-48(9)47(8,21-37(54)65)28(12-15-34(51)62)40(59-48)25(3)42-46(7,20-36(53)64)26(10-13-32(49)60)30(56-42)19-31-44(4,5)27(11-14-33(50)61)39(57-31)24(2)41(45)58-43;1-4-6(16)7(17)10(18-4)15-3-14-5-8(11)12-2-13-9(5)15;/h19,23,26-29,43H,10-18,20-22H2,1-9H3,(H16,49,50,51,52,53,54,55,56,57,58,59,60,61,62,63,64…	MQCMBMUJJHSGIF-QMUWONGRSA-K	CHEBI:58502	SBO:0000247
134	pep[c]	Phosphoenolpyruvate	C00074	cpd00061	C3H3O6P	-2	PHOSPHO-ENOL-PYRUVATE	pep_c	HMDB00263	MNXM73	3674425	[]	InChI=1S/C3H5O6P/c1-2(3(4)5)9-10(6,7)8/h1H2,(H,4,5)(H2,6,7,8)/p-3	DTBNBXWJWCWCIK-UHFFFAOYSA-K	CHEBI:58702	SBO:0000247
135	hom__L[c]	L-Homoserine	C00263	cpd00227	C4H9NO3	0	HOMO-SER	hom__L_c	HMDB00719	MNXM353	6971022	[]	InChI=1S/C4H9NO3/c5-3(1-2-6)4(7)8/h3,6H,1-2,5H2,(H,7,8)/t3-/m0/s1	UKAUYVFTDYCKQA-VKHMYHEASA-N	CHEBI:57476	SBO:0000247
136	succoa[c]	Succinyl-CoA	C00091	cpd00078	C25H36N7O19P3S	-4	SUC-COA	succoa_c	HMDB01022	MNXM92	45266545	70958	InChI=1S/C25H40N7O19P3S/c1-25(2,20(38)23(39)28-6-5-14(33)27-7-8-55-16(36)4-3-15(34)35)10-48-54(45,46)51-53(43,44)47-9-13-19(50-52(40,41)42)18(37)24(49-13)32-12-31-17-21(26)29-11-30-22(17)32/h11-13,18-20,24,37-38H,3-10H2,1-2H3,(H,27,33)(H,28,39)(H,34,35)(H,43,44)(H,45,46)(H2,26,29,30)(H2,40,41,42)/p-5/t13-,18-,19-,20+,24-/m1/s1	VNOYUJKHFWYWIR-ITIYDSSPSA-I	CHEBI:57292	SBO:0000247
137	suchms[c]	O-Succinyl-L-homoserine	C01118	cpd00822	C8H12NO6	-1	O-SUCCINYL-L-HOMOSERINE	suchms_c	[]	MNXM820	46878420	[]	InChI=1S/C8H13NO6/c9-5(8(13)14)3-4-15-7(12)2-1-6(10)11/h5H,1-4,9H2,(H,10,11)(H,13,14)/p-1/t5-/m0/s1	GNISQJGXJIDKDJ-YFKPBYRVSA-M	CHEBI:57661	SBO:0000247
138	2mecdp[c]	2-C-methyl-D-erythritol 2,4-cyclodiphosphate	C11453	cpd08301	C5H10O9P2	-2	2C-METH-D-ERYTHRITOL-CYCLODIPHOSPHATE	2mecdp_c	[]	MNXM1168	21605869	[]	InChI=1S/C5H12O9P2/c1-5(3-6)4(7)2-12-15(8,9)14-16(10,11)13-5/h4,6-7H,2-3H2,1H3,(H,8,9)(H,10,11)/p-2/t4-,5+/m1/s1	SFRQRNJMIIUYDI-UHNVWZDZSA-L	CHEBI:58483	SBO:0000247
139	h2mb4p[c]	1-hydroxy-2-methyl-2-(E)-butenyl 4-diphosphate	C11811	cpd08615	C5H10O8P2	-2	HYDROXY-METHYL-BUTENYL-DIP	h2mb4p_c	[]	MNXM606	21597501	[]	InChI=1S/C5H12O8P2/c1-5(4-6)2-3-12-15(10,11)13-14(7,8)9/h2,6H,3-4H2,1H3,(H,10,11)(H2,7,8,9)/p-3/b5-2+	MDSIZRKJVDMQOQ-GORDUTHDSA-K	CHEBI:128753	SBO:0000247
140	4izp[c]	4-Imidazolone-5-propanoate	C03680	cpd02311	C6H7N2O3	-1	4-IMIDAZOLONE-5-PROPIONATE	4izp_c	HMDB01014	MNXM90394	23615203	34979	InChI=1S/C6H8N2O3/c9-5(10)2-1-4-6(11)8-3-7-4/h3-4H,1-2H2,(H,9,10)(H,7,8,11)/p-1	HEXMLHKQVUFYME-UHFFFAOYSA-M	CHEBI:140725	SBO:0000247
141	skm[c]	Shikimate	C00493	cpd00383	C7H9O5	-1	SHIKIMATE	skm_c	HMDB03070	MNXM602	7057976	964932	InChI=1S/C7H10O5/c8-4-1-3(7(11)12)2-5(9)6(4)10/h1,4-6,8-10H,2H2,(H,11,12)/p-1/t4-,5-,6-/m1/s1	JXOHGGNKMLTUBP-HSUXUTPPSA-M	CHEBI:36208	SBO:0000247
142	skm5p[c]	Shikimate 5-phosphate	C03175	cpd02030	C7H9O8P	-2	SHIKIMATE-5P	skm5p_c	[]	MNXM1265	14506806	964859	InChI=1S/C7H11O8P/c8-4-1-3(7(10)11)2-5(6(4)9)15-16(12,13)14/h2,4-6,8-9H,1H2,(H,10,11)(H2,12,13,14)/p-3/t4-,5-,6+/m1/s1	QYOJSKGCWNAKGW-PBXRRBTRSA-K	CHEBI:145989	SBO:0000247
143	acorn[c]	N2-Acetyl-L-ornithine	C00437	cpd00342	C7H14N2O3	0	N-ALPHA-ACETYLORNITHINE	acorn_c	HMDB03357	MNXM817	6992102	[]	InChI=1S/C7H14N2O3/c1-5(10)9-6(7(11)12)3-2-4-8/h6H,2-4,8H2,1H3,(H,9,10)(H,11,12)/t6-/m0/s1	JRLGPAXAGHMNOL-LURJTMIESA-N	CHEBI:57805	SBO:0000247
144	acglu[c]	N-Acetyl-L-glutamate	C00624	cpd00477	C7H9NO5	-2	ACETYL-GLU	acglu_c	HMDB01138	MNXM730	1549099	30471	InChI=1S/C7H11NO5/c1-4(9)8-5(7(12)13)2-3-6(10)11/h5H,2-3H2,1H3,(H,8,9)(H,10,11)(H,12,13)/p-2/t5-/m0/s1	RFMMMVDNIPUKGG-YFKPBYRVSA-L	CHEBI:44337	SBO:0000247
145	orn[c]	Ornithine	C00077	cpd00064	C5H13N2O2	1	L-ORNITHINE	orn_c	HMDB0000214	MNXM89689	6992088	[]	InChI=1S/C5H12N2O2/c6-3-1-2-4(7)5(8)9/h4H,1-3,6-7H2,(H,8,9)/p+1/t4-/m0/s1	AHLPHDHHMVZTML-BYPYZUCNSA-O	CHEBI:46911	SBO:0000247
146	gly[c]	Glycine	C00037	cpd00033	C2H5NO2	0	GLY	gly_c	HMDB00123	MNXM29	5257127	[]	InChI=1S/C2H5NO2/c3-1-2(4)5/h1,3H2,(H,4,5)	DHMQDGOQFOQNFH-UHFFFAOYSA-N	CHEBI:57305	SBO:0000247
147	acald[c]	Acetaldehyde	C00084	cpd00071	C2H4O	0	ACETALD	acald_c	HMDB00990	MNXM75	177	[]	InChI=1S/C2H4O/c1-2-3/h2H,1H3	IKHGUXGNUITLKF-UHFFFAOYSA-N	CHEBI:15343	SBO:0000247
148	3hocoa[c]	(S)-3-Hydroxyoctanoyl-CoA	C05266	cpd03120	C29H47N7O18P3S	-3	[]	3hocoa_c	HMDB0003940	[]	11966216	[]	InChI=1S/C29H50N7O18P3S/c1-4-5-6-7-17(37)12-20(39)58-11-10-31-19(38)8-9-32-27(42)24(41)29(2,3)14-51-57(48,49)54-56(46,47)50-13-18-23(53-55(43,44)45)22(40)28(52-18)36-16-35-21-25(30)33-15-34-26(21)36/h15-18,22-24,28,37,40-41H,4-14H2,1-3H3,(H,31,38)(H,32,42)(H,46,47)(H,48,49)(H2,30,33,34)(H2,43,44,45)/t17-,18+,22+,23+,24-,28+/m0/s1	ATVGTMKWKDUCMS-OTOYJEMWSA-N	CHEBI:28632	SBO:0000247
149	3oocoa[c]	3-Oxooctanoyl-CoA	C05267	cpd03121	C29H45N7O18P3S	-3	CPD0-2106	3oocoa_c	HMDB03941	MNXM706	46173417	77328	InChI=1S/C29H48N7O18P3S/c1-4-5-6-7-17(37)12-20(39)58-11-10-31-19(38)8-9-32-27(42)24(41)29(2,3)14-51-57(48,49)54-56(46,47)50-13-18-23(53-55(43,44)45)22(40)28(52-18)36-16-35-21-25(30)33-15-34-26(21)36/h15-16,18,22-24,28,40-41H,4-14H2,1-3H3,(H,31,38)(H,32,42)(H,46,47)(H,48,49)(H2,30,33,34)(H2,43,44,45)/p-4/t18-,22-,23-,24+,28-/m1/s1	WPIVBCGRGVNDDT-CECATXLMSA-J	CHEBI:62619	SBO:0000247
150	3psme[c]	5-O-(1-Carboxyvinyl)-3-phosphoshikimate	C01269	cpd00932	C10H10O10P	-3	3-ENOLPYRUVYL-SHIKIMATE-5P	3psme_c	[]	MNXM1365	14506801	964900	InChI=1S/C10H13O10P/c1-4(9(12)13)19-6-2-5(10(14)15)3-7(8(6)11)20-21(16,17)18/h3,6-8,11H,1-2H2,(H,12,13)(H,14,15)(H2,16,17,18)/p-4/t6-,7-,8+/m1/s1	QUTYKIXIUDQOLK-PRJMDXOYSA-J	CHEBI:57701	SBO:0000247
151	chor[c]	chorismate	C00251	cpd00216	C10H8O6	-2	CHORISMATE	chor_c	HMDB12199	MNXM337	5460312	964856	InChI=1S/C10H10O6/c1-5(9(12)13)16-8-4-6(10(14)15)2-3-7(8)11/h2-4,7-8,11H,1H2,(H,12,13)(H,14,15)/p-2/t7-,8-/m1/s1	WTFXTQVDAKGDEY-HTQZYQBOSA-L	CHEBI:29748	SBO:0000247
152	glu5p[c]	L-Glutamate 5-phosphate	C03287	cpd02097	C5H9NO7P	-1	L-GLUTAMATE-5-P	glu5p_c	HMDB01228	MNXM1280	44457531	[]	InChI=1S/C5H10NO7P/c6-3(5(8)9)1-2-4(7)13-14(10,11)12/h3H,1-2,6H2,(H,8,9)(H2,10,11,12)/p-2/t3-/m0/s1	PJRXVIJAERNUIP-VKHMYHEASA-L	CHEBI:58274	SBO:0000247
153	fmn[c]	FMN	C00061	cpd00050	C17H20N4O9P	-1	FMN	fmn_c	HMDB01520	MNXM119	44229199	73524	InChI=1S/C17H21N4O9P/c1-7-3-9-10(4-8(7)2)21(15-13(18-9)16(25)20-17(26)19-15)5-11(22)14(24)12(23)6-30-31(27,28)29/h3-4,11-12,14,22-24H,5-6H2,1-2H3,(H3,20,25,26,27,28,29)/p-3/t11-,12+,14-/m0/s1	ANKZYBDXHMZBDK-SCRDCRAPSA-K	CHEBI:58210	SBO:0000247
154	ribflv[c]	Riboflavin	C00255	cpd00220	C17H20N4O6	0	RIBOFLAVIN	ribflv_c	HMDB00244	MNXM270	45480541	[]	InChI=1S/C17H20N4O6/c1-7-3-9-10(4-8(7)2)21(5-11(23)14(25)12(24)6-22)15-13(18-9)16(26)20-17(27)19-15/h3-4,11-12,14,22-25H,5-6H2,1-2H3,(H,20,26,27)/p-1/t11-,12+,14-/m0/s1	AUNGANRZJHBGPY-SCRDCRAPSA-M	CHEBI:57986	SBO:0000247
155	pydam[c]	Pyridoxamine	C00534	cpd00419	C8H13N2O2	1	PYRIDOXAMINE	pydam_c	HMDB01431	MNXM548	25245492	964945	InChI=1S/C8H12N2O2/c1-5-8(12)7(2-9)6(4-11)3-10-5/h3,11-12H,2,4,9H2,1H3/p+1	NHZMQXZHNVQTQA-UHFFFAOYSA-O	CHEBI:57761	SBO:0000247
156	pyam5p[c]	Pyridoxamine 5-phosphate	C00647	cpd00493	C8H13N2O5P	0	PYRIDOXAMINE-5P	pyam5p_c	HMDB01555	MNXM366	25246271	965146	InChI=1S/C8H13N2O5P/c1-5-8(11)7(2-9)6(3-10-5)4-15-16(12,13)14/h3,11H,2,4,9H2,1H3,(H2,12,13,14)/p-1	ZMJGSOSNSPKHNH-UHFFFAOYSA-M	CHEBI:58451	SBO:0000247
157	ump[c]	UMP	C00105	cpd00091	C9H12N2O9P	-1	UMP	ump_c	HMDB00288	MNXM80	1778309	[]	InChI=1S/C9H13N2O9P/c12-5-1-2-11(9(15)10-5)8-7(14)6(13)4(20-8)3-19-21(16,17)18/h1-2,4,6-8,13-14H,3H2,(H,10,12,15)(H2,16,17,18)/p-2/t4-,6-,7-,8-/m1/s1	DJJCXFVJDGTHFX-XVFCMESISA-L	CHEBI:57865	SBO:0000247
158	cys__L[c]	L-Cysteine	C00097	cpd00084	C3H7NO2S	0	CYS	cys__L_c	HMDB00574	MNXM55	6419722	[]	InChI=1S/C3H7NO2S/c4-2(1-7)3(5)6/h2,7H,1,4H2,(H,5,6)/t2-/m0/s1	XUJNEKJLAYXESH-REOHCLBHSA-N	CHEBI:35235	SBO:0000247
159	glucys[c]	gamma-L-Glutamyl-L-cysteine	C00669	cpd00506	C8H13N2O5S	-1	L-GAMMA-GLUTAMYLCYSTEINE	glucys_c	HMDB01049	MNXM412	7059430	174393	InChI=1S/C8H14N2O5S/c9-4(7(12)13)1-2-6(11)10-5(3-16)8(14)15/h4-5,16H,1-3,9H2,(H,10,11)(H,12,13)(H,14,15)/p-1/t4-,5-/m0/s1	RITKHVBHSGLULN-WHFBIAKZSA-M	CHEBI:58173	SBO:0000247
160	gsn[c]	Guanosine	C00387	cpd00311	C10H13N5O5	0	GUANOSINE	gsn_c	HMDB00133	MNXM401	6802	[]	InChI=1S/C10H13N5O5/c11-10-13-7-4(8(19)14-10)12-2-15(7)9-6(18)5(17)3(1-16)20-9/h2-3,5-6,9,16-18H,1H2,(H3,11,13,14,19)/t3-,5-,6-,9-/m1/s1	NYHBQMYGNKIUIF-UUOKFMHZSA-N	CHEBI:16750	SBO:0000247
161	gua[c]	Guanine	C00242	cpd00207	C5H5N5O	0	GUANINE	gua_c	HMDB00132	MNXM259	764	83956	InChI=1S/C5H5N5O/c6-5-9-3-2(4(11)10-5)7-1-8-3/h1H,(H4,6,7,8,9,10,11)	UYTPUPDQBNUYGX-UHFFFAOYSA-N	CHEBI:16235	SBO:0000247
162	r1p[c]	alpha-D-Ribose 1-phosphate	C00620	cpd00475	C5H10O8P	-1	RIBOSE-1P	r1p_c	HMDB01489	MNXM295	23615443	112016	InChI=1S/C5H11O8P/c6-1-2-3(7)4(8)5(12-2)13-14(9,10)11/h2-8H,1H2,(H2,9,10,11)/p-2/t2-,3-,4-,5-/m1/s1	YXJDFQJKERBOBM-TXICZTDVSA-L	CHEBI:57720	SBO:0000247
163	imacp[c]	3-(Imidazol-4-yl)-2-oxopropyl phosphate	C01267	cpd00930	C6H8N2O5P	-1	IMIDAZOLE-ACETOL-P	imacp_c	HMDB12236	MNXM1456	25244516	[]	InChI=1S/C6H9N2O5P/c9-6(3-13-14(10,11)12)1-5-2-7-4-8-5/h2,4H,1,3H2,(H,7,8)(H2,10,11,12)/p-2	YCFFMSOLUMRAMD-UHFFFAOYSA-L	CHEBI:57766	SBO:0000247
164	hisp[c]	L-Histidinol phosphate	C01100	cpd00807	C6H12N3O4P	0	L-HISTIDINOL-P	hisp_c	[]	MNXM1482	49791964	[]	InChI=1S/C6H12N3O4P/c7-5(3-13-14(10,11)12)1-6-2-8-4-9-6/h2,4-5H,1,3,7H2,(H,8,9)(H2,10,11,12)/p-1/t5-/m0/s1	CWNDERHTHMWBSI-YFKPBYRVSA-M	CHEBI:57980	SBO:0000247
165	2dhp[c]	2-Dehydropantoate	C00966	cpd00712	C6H9O4	-1	2-DEHYDROPANTOATE	2dhp_c	[]	MNXM959	16755619	[]	InChI=1S/C6H10O4/c1-6(2,3-7)4(8)5(9)10/h7H,3H2,1-2H3,(H,9,10)/p-1	PKVVTUWHANFMQC-UHFFFAOYSA-M	CHEBI:11561	SBO:0000247
166	pant__R[c]	(R)-Pantoate	C00522	cpd00408	C6H11O4	-1	L-PANTOATE	pant__R_c	[]	MNXM593	5289105	[]	InChI=1S/C6H12O4/c1-6(2,3-7)4(8)5(9)10/h4,7-8H,3H2,1-2H3,(H,9,10)/p-1/t4-/m0/s1	OTOIIPJYVQJATP-BYPYZUCNSA-M	CHEBI:15980	SBO:0000247
167	pram[c]	5-Phospho-beta-D-ribosylamine	C03090	cpd01982	C5H12NO7P	0	5-P-BETA-D-RIBOSYL-AMINE	pram_c	HMDB01128	MNXM90003	45266724	111292	InChI=1S/C5H12NO7P/c6-5-4(8)3(7)2(13-5)1-12-14(9,10)11/h2-5,7-8H,1,6H2,(H2,9,10,11)/p-1/t2-,3-,4-,5-/m1/s1	SKCBPEVYGOQGJN-TXICZTDVSA-M	CHEBI:58681	SBO:0000247
168	gar[c]	N1-(5-Phospho-D-ribosyl)glycinamide	C03838	cpd02394	C7H15N2O8P	0	5-PHOSPHO-RIBOSYL-GLYCINEAMIDE	gar_c	HMDB02022	MNXM463	90657462	[]	InChI=1S/C7H15N2O8P/c8-1-4(10)9-7-6(12)5(11)3(17-7)2-16-18(13,14)15/h3,5-7,11-12H,1-2,8H2,(H,9,10)(H2,13,14,15)/p-1/t3-,5-,6-,7-/m1/s1	OBQMLSFOUZUIOB-SHUUEZRQSA-M	CHEBI:143788	SBO:0000247
169	myrsACP[c]	Myristoyl-ACP (n-C14:0ACP)	C05761	cpd11466	C25H46N2O7PSR	-1	Myristoyl-ACPs	myrsACP_c	[]	MNXM564	[]	[]	[]	[]	CHEBI:50651	SBO:0000247
170	malACP[c]	Malonyl_ACP	C01209	cpd11492	C14H21N2O9PSR	-2	MALONYL-ACP	malACP_c	[]	MNXM184	[]	[]	[]	[]	CHEBI:17330	SBO:0000247
171	ACP[c]	acyl carrier protein	C00229	cpd11493	C11H20N2O6PSR	-1	ACP	ACP_c	[]	MNXM925	[]	[]	[]	[]	CHEBI:18359	SBO:0000247
172	3opalmACP[c]	3-Oxohexadecanoyl-[acyl-carrier protein]	C05762	cpd11485	C27H48N2O8PSR	-1	3-oxo-palmitoyl-ACPs	3opalmACP_c	[]	MNXM4345	[]	[]	[]	[]	CHEBI:1639	SBO:0000247
173	imp[c]	IMP	C00130	cpd00114	C10H12N4O8P	-1	IMP	imp_c	HMDB00175	MNXM125	7140378	[]	InChI=1S/C10H13N4O8P/c15-6-4(1-21-23(18,19)20)22-10(7(6)16)14-3-13-5-8(14)11-2-12-9(5)17/h2-4,6-7,10,15-16H,1H2,(H,11,12,17)(H2,18,19,20)/p-2/t4-,6-,7-,10-/m1/s1	GRSZFWQUAKGDAV-KQYNXXCUSA-L	CHEBI:58053	SBO:0000247
174	xmp[c]	Xanthosine 5-phosphate	C00655	cpd00497	C10H12N4O9P	-1	XANTHOSINE-5-PHOSPHATE	xmp_c	HMDB01554	MNXM298	23421208	111584	InChI=1S/C10H13N4O9P/c15-5-3(1-22-24(19,20)21)23-9(6(5)16)14-2-11-4-7(14)12-10(18)13-8(4)17/h2-3,5-6,9,15-16H,1H2,(H2,19,20,21)(H2,12,13,17,18)/p-2/t3-,5-,6-,9-/m1/s1	DCTLYFZHFGENCW-UUOKFMHZSA-L	CHEBI:57464	SBO:0000247
175	ipdp[c]	Isopentenyl diphosphate	C00129	cpd00113	C5H10O7P2	-2	DELTA3-ISOPENTENYL-PP	ipdp_c	HMDB01347	MNXM83	15983957	[]	InChI=1S/C5H12O7P2/c1-5(2)3-4-11-14(9,10)12-13(6,7)8/h1,3-4H2,2H3,(H,9,10)(H2,6,7,8)/p-3	NUHSROFQTUXZQQ-UHFFFAOYSA-K	CHEBI:128769	SBO:0000247
176	dudp[c]	dUDP	C01346	cpd00978	C9H12N2O11P2	-2	DUDP	dudp_c	HMDB01000	MNXM572	25246037	[]	InChI=1S/C9H14N2O11P2/c12-5-3-8(11-2-1-7(13)10-9(11)14)21-6(5)4-20-24(18,19)22-23(15,16)17/h1-2,5-6,8,12H,3-4H2,(H,18,19)(H,10,13,14)(H2,15,16,17)/p-3/t5-,6+,8+/m0/s1	QHWZTVCCBMIIKE-SHYZEUOFSA-K	CHEBI:60471	SBO:0000247
177	dutp[c]	dUTP	C00460	cpd00358	C9H12N2O14P3	-3	DUTP	dutp_c	HMDB01191	MNXM452	25244408	500739	InChI=1S/C9H15N2O14P3/c12-5-3-8(11-2-1-7(13)10-9(11)14)23-6(5)4-22-27(18,19)25-28(20,21)24-26(15,16)17/h1-2,5-6,8,12H,3-4H2,(H,18,19)(H,20,21)(H,10,13,14)(H2,15,16,17)/p-4/t5-,6+,8+/m0/s1	AHCYMLUZIRLXAA-SHYZEUOFSA-J	CHEBI:61555	SBO:0000247
178	ctp[c]	CTP	C00063	cpd00052	C9H13N3O14P3	-3	CTP	ctp_c	HMDB00082	MNXM63	7058166	[]	InChI=1S/C9H16N3O14P3/c10-5-1-2-12(9(15)11-5)8-7(14)6(13)4(24-8)3-23-28(19,20)26-29(21,22)25-27(16,17)18/h1-2,4,6-8,13-14H,3H2,(H,19,20)(H,21,22)(H2,10,11,15)(H2,16,17,18)/p-4/t4-,6-,7-,8-/m1/s1	PCDQPRRSZKQHHS-XVFCMESISA-J	CHEBI:37563	SBO:0000247
179	34hpp[c]	3-(4-Hydroxyphenyl)pyruvate	C01179	cpd00868	C9H7O4	-1	P-HYDROXY-PHENYLPYRUVATE	34hpp_c	HMDB00707	MNXM153	6971070	31365	InChI=1S/C9H8O4/c10-7-3-1-6(2-4-7)5-8(11)9(12)13/h1-4,10H,5H2,(H,12,13)/p-1	KKADPXVIOXHVKN-UHFFFAOYSA-M	CHEBI:36242	SBO:0000247
180	ppp9[c]	Protoporphyrin	C02191	cpd01476	C34H32N4O4	-2	PROTOPORPHYRIN_IX	ppp9_c	HMDB00241	MNXM346	3794562	[]	InChI=1S/C34H34N4O4/c1-7-21-17(3)25-13-26-19(5)23(9-11-33(39)40)31(37-26)16-32-24(10-12-34(41)42)20(6)28(38-32)15-30-22(8-2)18(4)27(36-30)14-29(21)35-25/h7-8,13-16,35,38H,1-2,9-12H2,3-6H3,(H,39,40)(H,41,42)/p-2/b25-13-,26-13-,27-14-,28-15-,29-14-,30-15-,31-16-,32-16-	KSFOVUSSGSKXFI-UJJXFSCMSA-L	CHEBI:57306	SBO:0000247
181	pheme[c]	Protoheme	C00032	cpd00028	C34H30N4O4Fe	-2	Heme-b	pheme_c	HMDB03178	MNXM147478	44229124	[]	InChI=1S/C34H34N4O4.Fe/c1-7-21-17(3)25-13-26-19(5)23(9-11-33(39)40)31(37-26)16-32-24(10-12-34(41)42)20(6)28(38-32)15-30-22(8-2)18(4)27(36-30)14-29(21)35-25;/h7-8,13-16H,1-2,9-12H2,3-6H3,(H4,35,36,37,38,39,40,41,42);/q;+4/p-4/b25-13-,26-13-,27-14-,28-15-,29-14-,30-15-,31-16-,32-16-;	YHLKGEDAGPGZPN-RGGAHWMASA-J	CHEBI:26355	SBO:0000247
182	23dhmb[c]	(R)-2,3-Dihydroxy-3-methylbutanoate	C04039	cpd02498	C5H9O4	-1	DIOH-ISOVALERATE	23dhmb_c	[]	[]	21933884	[]	InChI=1S/C5H10O4/c1-5(2,9)3(6)4(7)8/h3,6,9H,1-2H3,(H,7,8)/p-1	[]	CHEBI:11424	SBO:0000247
183	alac__S[c]	(S)-2-Acetolactate	C06010	cpd00668	C5H7O4	-1	2-ACETO-LACTATE	alac__S_c	HMDB06855	MNXM114079	13999770	[]	InChI=1S/C5H8O4/c1-3(6)5(2,9)4(7)8/h9H,1-2H3,(H,7,8)/p-1/t5-/m0/s1	NMDWGEGFJUBKLB-YFKPBYRVSA-M	CHEBI:58476	SBO:0000247
184	3hhdcoa[c]	(S)-3-Hydroxyhexadecanoyl-CoA	C05258	cpd03113	C37H63N7O18P3S	-3	CPD0-2232	3hhdcoa_c	HMDB03932	MNXM825	49859614	77300	InChI=1S/C37H66N7O18P3S/c1-4-5-6-7-8-9-10-11-12-13-14-15-25(45)20-28(47)66-19-18-39-27(46)16-17-40-35(50)32(49)37(2,3)22-59-65(56,57)62-64(54,55)58-21-26-31(61-63(51,52)53)30(48)36(60-26)44-24-43-29-33(38)41-23-42-34(29)44/h23-26,30-32,36,45,48-49H,4-22H2,1-3H3,(H,39,46)(H,40,50)(H,54,55)(H,56,57)(H2,38,41,42)(H2,51,52,53)/p-4/t25-,26+,30+,31+,32-,36+/m0/s1	DEHLMTDDPWDRDR-BCIKBWLNSA-J	CHEBI:62613	SBO:0000247
185	hdd2coa[c]	trans-Hexadec-2-enoyl-CoA	C05272	cpd03126	C37H61N7O17P3S	-3	CPD0-2117	hdd2coa_c	HMDB03945	MNXM581	46173176	77284	InChI=1S/C37H64N7O17P3S/c1-4-5-6-7-8-9-10-11-12-13-14-15-16-17-28(46)65-21-20-39-27(45)18-19-40-35(49)32(48)37(2,3)23-58-64(55,56)61-63(53,54)57-22-26-31(60-62(50,51)52)30(47)36(59-26)44-25-43-29-33(38)41-24-42-34(29)44/h16-17,24-26,30-32,36,47-48H,4-15,18-23H2,1-3H3,(H,39,45)(H,40,49)(H,53,54)(H,55,56)(H2,38,41,42)(H2,50,51,52)/p-4/b17-16+/t26-,30-,31-,32+,36-/m1/s1	JUPAQFRKPHPXLD-MSHHSVQMSA-J	CHEBI:61526	SBO:0000247
186	3mob[c]	3-Methyl-2-oxobutanoate	C00141	cpd00123	C5H7O3	-1	2-KETO-ISOVALERATE	3mob_c	HMDB00019	MNXM238	5204641	[]	InChI=1S/C5H8O3/c1-3(2)4(6)5(7)8/h3H,1-2H3,(H,7,8)/p-1	QHKABHOOEWYVLI-UHFFFAOYSA-M	CHEBI:11851	SBO:0000247
187	3c3hmp[c]	3-Carboxy-3-hydroxy-4-methylpentanoate	C02504	cpd01646	C7H10O5	-2	3-CARBOXY-3-HYDROXY-ISOCAPROATE	3c3hmp_c	HMDB00402	MNXM985	6419727	[]	InChI=1S/C7H12O5/c1-4(2)7(12,6(10)11)3-5(8)9/h4,12H,3H2,1-2H3,(H,8,9)(H,10,11)/p-2/t7-/m0/s1	BITYXLXUCSKTJS-ZETCQYMHSA-L	CHEBI:1178	SBO:0000247
188	e4p[c]	D-Erythrose 4-phosphate	C00279	cpd00236	C4H8O7P	-1	ERYTHROSE-4P	e4p_c	HMDB01321	MNXM258	5459862	29878	InChI=1S/C4H9O7P/c5-1-3(6)4(7)2-11-12(8,9)10/h1,3-4,6-7H,2H2,(H2,8,9,10)/p-2/t3-,4+/m0/s1	NGHMDNPXVRFFGS-IUYQGCFVSA-L	CHEBI:16897	SBO:0000247
189	4per[c]	4-Phospho-D-erythronate	C03393	cpd02147	C4H7O8P	-2	ERYTHRONATE-4P	4per_c	[]	MNXM1407	45266760	[]	InChI=1S/C4H9O8P/c5-2(3(6)4(7)8)1-12-13(9,10)11/h2-3,5-6H,1H2,(H,7,8)(H2,9,10,11)/p-3/t2-,3-/m1/s1	ZCZXOHUILRHRQJ-PWNYCUMCSA-K	CHEBI:58766	SBO:0000247
190	pphn[c]	Prephenate	C00254	cpd00219	C10H8O6	-2	PREPHENATE	pphn_c	HMDB12283	MNXM503	5460303	[]	InChI=1S/C10H10O6/c11-6-1-3-10(4-2-6,9(15)16)5-7(12)8(13)14/h1-4,6,11H,5H2,(H,13,14)(H,15,16)/p-2/t6-,10+	FPWMCUPFBRFMLH-XGAOUMNUSA-L	CHEBI:29934	SBO:0000247
191	phpyr[c]	Phenylpyruvate	C00166	cpd00143	C9H7O3	-1	PHENYL-PYRUVATE	phpyr_c	HMDB00205	MNXM162242	4592697	[]	InChI=1S/C9H8O3/c10-8(9(11)12)6-7-4-2-1-3-5-7/h1-5H,6H2,(H,11,12)/p-1	BTNMPGBKDVTSJY-UHFFFAOYSA-M	CHEBI:18005	SBO:0000247
192	ptrc[c]	Putrescine	C00134	cpd00118	C4H14N2	2	PUTRESCINE	ptrc_c	HMDB01414	MNXM118	3452892	[]	InChI=1S/C4H12N2/c5-3-1-2-4-6/h1-6H2/p+2	KIDHWZJUCRJVML-UHFFFAOYSA-P	CHEBI:326268	SBO:0000247
193	acACP[c]	Acetyl-ACP	C03939	cpd11494	C13H22N2O7PSR	-1	ACETYL-ACP	acACP_c	[]	MNXM1269	[]	[]	[]	[]	CHEBI:17093	SBO:0000247
194	actACP[c]	Acetoacetyl-ACP	C05744	cpd11488	C15H24N2O8PSR	-1	Acetoacetyl-ACPs	actACP_c	[]	[]	[]	[]	[]	[]	CHEBI:2393	SBO:0000247
195	glu__L[e]	L_Glutamate	C00025	cpd00023	C5H8NO4	-1	GLT	glu__L_e	HMDB00148	[]	5460299	[]	InChI=1S/C5H9NO4/c6-3(5(9)10)1-2-4(7)8/h3H,1-2,6H2,(H,7,8)(H,9,10)/p-1/t3-/m0/s1	WHUUTDBJXJRKMK-VKHMYHEASA-M	CHEBI:29985	SBO:0000247
196	inost[c]	myo-Inositol	C00137	cpd00121	C6H12O6	0	MYO-INOSITOL	inost_c	HMDB00211	[]	892	[]	InChI=1S/C6H12O6/c7-1-2(8)4(10)6(12)5(11)3(1)9/h1-12H/t1-,2-,3-,4+,5-,6-	CDAISMWEOUEBRE-GPIVLXJGSA-N	CHEBI:17268	SBO:0000247
197	inost[e]	myo-Inositol	C00137	cpd00121	C6H12O6	0	MYO-INOSITOL	inost_e	HMDB00211	[]	892	[]	InChI=1S/C6H12O6/c7-1-2(8)4(10)6(12)5(11)3(1)9/h1-12H/t1-,2-,3-,4+,5-,6-	CDAISMWEOUEBRE-GPIVLXJGSA-N	CHEBI:17268	SBO:0000247
198	succ[c]	Succinate	C00042	cpd00036	C4H4O4	-2	SUC	succ_c	HMDB00254	MNXM25	160419	[]	InChI=1S/C4H6O4/c5-3(6)1-2-4(7)8/h1-2H2,(H,5,6)(H,7,8)/p-2	KDYFGRWQOYBRFD-UHFFFAOYSA-L	CHEBI:30031	SBO:0000247
199	fad[c]	Flavin adenine dinucleotide oxidized	C00016	cpd00015	C27H31N9O15P2	-2	FAD	fad_c	HMDB01248	MNXM33	46906035	[]	InChI=1S/C27H33N9O15P2/c1-10-3-12-13(4-11(10)2)35(24-18(32-12)25(42)34-27(43)33-24)5-14(37)19(39)15(38)6-48-52(44,45)51-53(46,47)49-7-16-20(40)21(41)26(50-16)36-9-31-17-22(28)29-8-30-23(17)36/h3-4,8-9,14-16,19-21,26,37-41H,5-7H2,1-2H3,(H5,28,29,30,34,42,43,44,45,46,47)/p-3/t14-,15+,16+,19-,20+,21+,26+/m0/s1	IMGVNJNCCGXBHD-UYBVJOGSSA-K	CHEBI:57692	SBO:0000247
200	fadh2[c]	Flavin adenine dinucleotide reduced	C01352	cpd00982	C27H33N9O15P2	-2	FADH2	fadh2_c	HMDB01197	MNXM38	46931118	[]	InChI=1S/C27H35N9O15P2/c1-10-3-12-13(4-11(10)2)35(24-18(32-12)25(42)34-27(43)33-24)5-14(37)19(39)15(38)6-48-52(44,45)51-53(46,47)49-7-16-20(40)21(41)26(50-16)36-9-31-17-22(28)29-8-30-23(17)36/h3-4,8-9,14-16,19-21,26,32,37-41H,5-7H2,1-2H3,(H,44,45)(H,46,47)(H2,28,29,30)(H2,33,34,42,43)/p-2/t14-,15+,16+,19-,20+,21+,26+/m0/s1	YPZRHBJKEMOYQH-UYBVJOGSSA-L	CHEBI:58307	SBO:0000247
201	utp[c]	UTP	C00075	cpd00062	C9H12N2O15P3	-3	UTP	utp_c	HMDB00285	MNXM121	7058168	29494	InChI=1S/C9H15N2O15P3/c12-5-1-2-11(9(15)10-5)8-7(14)6(13)4(24-8)3-23-28(19,20)26-29(21,22)25-27(16,17)18/h1-2,4,6-8,13-14H,3H2,(H,19,20)(H,21,22)(H,10,12,15)(H2,16,17,18)/p-4/t4-,6-,7-,8-/m1/s1	PGAVKCOVUIYSFO-XVFCMESISA-J	CHEBI:46398	SBO:0000247
202	rna[c]	RNA	C00046	cpd11613	C9.5H10.75N3.75O7P	-3	RNA-Holder	[]	[]	MNXM90337	[]	[]	[]	[]	[]	SBO:0000247
203	dhap[c]	Dihydroxyacetone phosphate	C00111	cpd00095	C3H6O6P	-1	DIHYDROXY-ACETONE-PHOSPHATE	dhap_c	HMDB01473	MNXM77	4643300	[]	InChI=1S/C3H7O6P/c4-1-3(5)2-9-10(6,7)8/h4H,1-2H2,(H2,6,7,8)/p-2	GNGACRATGGDKBX-UHFFFAOYSA-L	CHEBI:57642	SBO:0000247
204	gmp[c]	GMP	C00144	cpd00126	C10H13N5O8P	-1	GMP	gmp_c	HMDB01397	MNXM113	1807035	[]	InChI=1S/C10H14N5O8P/c11-10-13-7-4(8(18)14-10)12-2-15(7)9-6(17)5(16)3(23-9)1-22-24(19,20)21/h2-3,5-6,9,16-17H,1H2,(H2,19,20,21)(H3,11,13,14,18)/p-2/t3-,5-,6-,9-/m1/s1	RQFCJASXJCIDSX-UUOKFMHZSA-L	CHEBI:58115	SBO:0000247
205	dgdp[c]	dGDP	C00361	cpd00295	C10H13N5O10P2	-2	DGDP	dgdp_c	HMDB00960	MNXM436	25245673	500077	InChI=1S/C10H15N5O10P2/c11-10-13-8-7(9(17)14-10)12-3-15(8)6-1-4(16)5(24-6)2-23-27(21,22)25-26(18,19)20/h3-6,16H,1-2H2,(H,21,22)(H2,18,19,20)(H3,11,13,14,17)/p-3/t4-,5+,6+/m0/s1	CIKGWCTVFSRMJU-KVQBGUIXSA-K	CHEBI:58595	SBO:0000247
206	25aics[c]	(S)-2-[5-Amino-1-(5-phospho-D-ribosyl)imidazole-4-carboxamido]succinate	C04823	cpd02921	C13H16N4O12P	-3	P-RIBOSYL-4-SUCCCARB-AMINOIMIDAZOLE	25aics_c	HMDB00797	MNXM607	45266647	111399	InChI=1S/C13H19N4O12P/c14-10-7(11(22)16-4(13(23)24)1-6(18)19)15-3-17(10)12-9(21)8(20)5(29-12)2-28-30(25,26)27/h3-5,8-9,12,20-21H,1-2,14H2,(H,16,22)(H,18,19)(H,23,24)(H2,25,26,27)/p-4/t4?,5-,8-,9-,12-/m1/s1	NAQGHJTUZRHGAC-LBGUGVGYSA-J	CHEBI:58443	SBO:0000247
207	aicar[c]	5-Amino-1-(5-Phospho-D-ribosyl)imidazole-4-carboxamide	C04677	cpd02851	C9H14N4O8P	-1	AICAR	aicar_c	HMDB01517	MNXM365	45266657	111409	InChI=1S/C9H15N4O8P/c10-7-4(8(11)16)12-2-13(7)9-6(15)5(14)3(21-9)1-20-22(17,18)19/h2-3,5-6,9,14-15H,1,10H2,(H2,11,16)(H2,17,18,19)/p-2/t3-,5-,6-,9-/m1/s1	NOTGFIUVDGNKRI-UUOKFMHZSA-L	CHEBI:58475	SBO:0000247
208	histd[c]	L-Histidinol	C00860	cpd00641	C6H12N3O	1	HISTIDINOL	histd_c	HMDB03431	MNXM1281	6950298	[]	InChI=1S/C6H11N3O/c7-5(3-10)1-6-2-8-4-9-6/h2,4-5,10H,1,3,7H2,(H,8,9)/p+1/t5-/m0/s1	ZQISRDCJNBUVMM-YFKPBYRVSA-O	CHEBI:57699	SBO:0000247
209	his__L[c]	L-Histidine	C00135	cpd00119	C6H9N3O2	0	HIS	his__L_c	HMDB00177	MNXM134	6971009	[]	InChI=1S/C6H9N3O2/c7-5(6(10)11)1-4-2-8-3-9-4/h2-3,5H,1,7H2,(H,8,9)(H,10,11)/t5-/m0/s1	HNDVDQJCIGZPNO-YFKPBYRVSA-N	CHEBI:57595	SBO:0000247
210	dump[c]	dUMP	C00365	cpd00299	C9H12N2O8P	-1	DUMP	dump_c	HMDB01409	MNXM234	18601100	[]	InChI=1S/C9H13N2O8P/c12-5-3-8(11-2-1-7(13)10-9(11)14)19-6(5)4-18-20(15,16)17/h1-2,5-6,8,12H,3-4H2,(H,10,13,14)(H2,15,16,17)/p-2/t5-,6+,8+/m0/s1	JSRLJPSBLDHEIO-SHYZEUOFSA-L	CHEBI:246422	SBO:0000247
211	acg5p[c]	N-Acetyl-L-glutamyl 5-phosphate	C04133	cpd02552	C7H10NO8P	-2	N-ACETYL-GLUTAMYL-P	acg5p_c	HMDB06456	MNXM1384	49791951	[]	InChI=1S/C7H12NO8P/c1-4(9)8-5(7(11)12)2-3-6(10)16-17(13,14)15/h5H,2-3H2,1H3,(H,8,9)(H,11,12)(H2,13,14,15)/p-3/t5-/m0/s1	FCVIHFVSXHOPSW-YFKPBYRVSA-K	CHEBI:57936	SBO:0000247
212	dnad[c]	Deamino-NAD+	C00857	cpd00638	C21H24N6O15P2	-2	DEAMIDO-NAD	dnad_c	HMDB01179	MNXM309	45266646	[]	InChI=1S/C21H26N6O15P2/c22-17-12-18(24-7-23-17)27(8-25-12)20-16(31)14(29)11(41-20)6-39-44(36,37)42-43(34,35)38-5-10-13(28)15(30)19(40-10)26-3-1-2-9(4-26)21(32)33/h1-4,7-8,10-11,13-16,19-20,28-31H,5-6H2,(H4-,22,23,24,32,33,34,35,36,37)/p-2/t10-,11-,13-,14-,15-,16-,19-,20-/m1/s1	SENPVEZBRZQVST-HISDBWNOSA-L	CHEBI:58437	SBO:0000247
213	2ahethmpp[c]	Hydroxy ethyl Thiamin diphosphate	C05125	cpd03049	C14H21N4O8P2S	-1	2-ALPHA-HYDROXYETHYL-THPP	2ahethmpp_c	HMDB03904	MNXM1705	46878487	[]	InChI=1S/C14H22N4O8P2S/c1-8-12(4-5-25-28(23,24)26-27(20,21)22)29-14(9(2)19)18(8)7-11-6-16-10(3)17-13(11)15/h6,9,19H,4-5,7H2,1-3H3,(H4-,15,16,17,20,21,22,23,24)/p-2	RRUVJGASJONMDY-UHFFFAOYSA-L	CHEBI:58939	SBO:0000247
214	thmpp[c]	Thiamine diphosphate	C00068	cpd00056	C12H17N4O7P2S	-1	THIAMINE-PYROPHOSPHATE	thmpp_c	HMDB01372	MNXM256	15938963	[]	InChI=1S/C12H18N4O7P2S/c1-8-11(3-4-22-25(20,21)23-24(17,18)19)26-7-16(8)6-10-5-14-9(2)15-12(10)13/h5,7H,3-4,6H2,1-2H3,(H4-,13,14,15,17,18,19,20,21)/p-2	AYEKOFBPNLCAJY-UHFFFAOYSA-L	CHEBI:58937	SBO:0000247
215	ins[c]	Inosine	C00294	cpd00246	C10H12N4O5	0	INOSINE	ins_c	HMDB00195	MNXM334	6021	[]	InChI=1S/C10H12N4O5/c15-1-4-6(16)7(17)10(19-4)14-3-13-5-8(14)11-2-12-9(5)18/h2-4,6-7,10,15-17H,1H2,(H,11,12,18)/t4-,6-,7-,10-/m1/s1	UGQMRVRMYYASKQ-KQYNXXCUSA-N	CHEBI:17596	SBO:0000247
216	hxan[c]	Hypoxanthine	C00262	cpd00226	C5H4N4O	0	HYPOXANTHINE	hxan_c	HMDB00157	[]	135398638	[]	InChI=1S/C5H4N4O/c10-5-3-4(7-1-6-3)8-2-9-5/h1-2H,(H2,6,7,8,9,10)	FDGQSTZJBFJUBT-UHFFFAOYSA-N	CHEBI:17368	SBO:0000247
217	urcan[c]	Urocanate	C00785	cpd00581	C6H5N2O2	-1	UROCANATE	urcan_c	HMDB00301	MNXM700	5460052	30721	InChI=1S/C6H6N2O2/c9-6(10)2-1-5-3-7-4-8-5/h1-4H,(H,7,8)(H,9,10)/p-1/b2-1+	LOIYMIARKYCTBW-OWOJBTEDSA-M	CHEBI:17771	SBO:0000247
218	pydxn[c]	Pyridoxine	C00314	cpd00263	C8H11NO3	0	PYRIDOXINE	pydxn_c	HMDB00239	MNXM419	1054	965053	InChI=1S/C8H11NO3/c1-5-8(12)7(4-11)6(3-10)2-9-5/h2,10-12H,3-4H2,1H3	LXNHXLLTXMVWPM-UHFFFAOYSA-N	CHEBI:16709	SBO:0000247
219	xan[c]	Xanthine	C00385	cpd00309	C5H4N4O2	0	XANTHINE	xan_c	HMDB00292	MNXM174	1188	30064	InChI=1S/C5H4N4O2/c10-4-2-3(7-1-6-2)8-5(11)9-4/h1H,(H3,6,7,8,9,10,11)	LRFVTYWOQMYALW-UHFFFAOYSA-N	CHEBI:17712	SBO:0000247
220	succ[e]	Succinate	C00042	cpd00036	C4H4O4	-2	SUC	succ_e	HMDB00254	MNXM25	160419	[]	InChI=1S/C4H6O4/c5-3(6)1-2-4(7)8/h1-2H2,(H,5,6)(H,7,8)/p-2	KDYFGRWQOYBRFD-UHFFFAOYSA-L	CHEBI:30031	SBO:0000247
221	ala__L[c]	L-Alanine	C00041	cpd00035	C3H7NO2	0	L-ALPHA-ALANINE	ala__L_c	HMDB00161	[]	7311724	[]	InChI=1S/C3H7NO2/c1-2(4)3(5)6/h2H,4H2,1H3,(H,5,6)/t2-/m0/s1	QNAYBMKLOCPYGJ-REOHCLBHSA-N	CHEBI:57972	SBO:0000247
222	dad_2[c]	Deoxyadenosine	C00559	cpd00438	C10H13N5O3	0	DEOXYADENOSINE	dad_2_c	HMDB00101	MNXM625	13730	[]	InChI=1S/C10H13N5O3/c11-9-8-10(13-3-12-9)15(4-14-8)7-1-5(17)6(2-16)18-7/h3-7,16-17H,1-2H2,(H2,11,12,13)/t5-,6+,7+/m0/s1	OLXZPDWKRNYJJZ-RRKCRQDMSA-N	CHEBI:17256	SBO:0000247
223	ade[c]	Adenine	C00147	cpd00128	C5H5N5	0	ADENINE	ade_c	HMDB00034	[]	190	[]	InChI=1S/C5H5N5/c6-4-3-5(9-1-7-3)10-2-8-4/h1-2H,(H3,6,7,8,9,10)	GFFGJBXGBJISGV-UHFFFAOYSA-N	CHEBI:16708	SBO:0000247
224	dhnpt[c]	Dihydroneopterin	C04874	cpd02961	C9H13N5O4	0	DIHYDRO-NEO-PTERIN	dhnpt_c	HMDB02275	MNXM162359	65074	[]	InChI=1S/C9H13N5O4/c10-9-13-7-5(8(18)14-9)12-3(1-11-7)6(17)4(16)2-15/h4,6,15-17H,1-2H2,(H4,10,11,13,14,18)/t4-,6+/m1/s1	YQIFAMYNGGOTFB-XINAWCOVSA-N	CHEBI:17001	SBO:0000247
225	26dap__M[c]	meso-2,6-Diaminoheptanedioate	C00680	cpd00516	C7H14N2O4	0	MESO-DIAMINOPIMELATE	26dap__M_c	[]	MNXM529	1549101	[]	InChI=1S/C7H14N2O4/c8-4(6(10)11)2-1-3-5(9)7(12)13/h4-5H,1-3,8-9H2,(H,10,11)(H,12,13)/t4-,5+	GMKMEZVLHJARHF-SYDPRGILSA-N	CHEBI:57791	SBO:0000247
226	lys__L[c]	L-Lysine	C00047	cpd00039	C6H15N2O2	1	LYS	lys__L_c	HMDB00182	MNXM78	5460926	[]	InChI=1S/C6H14N2O2/c7-4-2-1-3-5(8)6(9)10/h5H,1-4,7-8H2,(H,9,10)/p+1/t5-/m0/s1	KDXKERNSBIXSRK-YFKPBYRVSA-O	CHEBI:32551	SBO:0000247
227	nh3[e]	Ammonia	C00014	cpd00013	H3N	0	AMMONIA	nh3_e	HMDB00051	[]	222	[]	InChI=1S/H3N/h1H3	QGZKDVFQNNGYKY-UHFFFAOYSA-N	CHEBI:16134	SBO:0000247
228	5aprbu[c]	5-Amino-6-(5-phosphoribitylamino)uracil	C04454	cpd02720	C9H16N4O9P	-1	CPD-1086	5aprbu_c	HMDB03841	MNXM1178	45266638	[]	InChI=1S/C9H17N4O9P/c10-5-7(12-9(18)13-8(5)17)11-1-3(14)6(16)4(15)2-22-23(19,20)21/h3-4,6,14-16H,1-2,10H2,(H2,19,20,21)(H3,11,12,13,17,18)/p-2/t3-,4+,6-/m0/s1	RQRINYISXYAZKL-RPDRRWSUSA-L	CHEBI:58421	SBO:0000247
229	3dhsk[c]	3-Dehydroshikimate	C02637	cpd01716	C7H7O5	-1	3-DEHYDRO-SHIKIMATE	3dhsk_c	[]	MNXM611	5460360	964941	InChI=1S/C7H8O5/c8-4-1-3(7(11)12)2-5(9)6(4)10/h1,5-6,9-10H,2H2,(H,11,12)/p-1/t5-,6-/m1/s1	SLWWJZMPHJJOPH-PHDIDXHHSA-M	CHEBI:16630	SBO:0000247
230	asn__L[c]	L-Asparagine	C00152	cpd00132	C4H8N2O3	0	ASN	asn__L_c	HMDB00168	MNXM147	6992089	[]	InChI=1S/C4H8N2O3/c5-2(4(8)9)1-3(6)7/h2H,1,5H2,(H2,6,7)(H,8,9)/t2-/m0/s1	DCXYFEDJOCDNAF-REOHCLBHSA-N	CHEBI:58048	SBO:0000247
231	tmrs2eACP[c]	trans-Tetradec-2-enoyl-[acyl-carrier protein]	C05760	cpd11467	C25H44N2O7PSR	-1	Tetradec-2-enoyl-ACPs	tmrs2eACP_c	[]	MNXM24297	[]	[]	[]	[]	CHEBI:10735	SBO:0000247
232	2ahbut[c]	(S)-2-Aceto-2-hydroxybutanoate	C06006	cpd00498	C6H9O4	-1	2-ACETO-2-HYDROXY-BUTYRATE	2ahbut_c	HMDB06900	MNXM114220	21145135	[]	InChI=1S/C6H10O4/c1-3-6(10,4(2)7)5(8)9/h10H,3H2,1-2H3,(H,8,9)/p-1/t6-/m0/s1	VUQLHQFKACOHNZ-LURJTMIESA-M	CHEBI:49256	SBO:0000247
233	gcald[c]	Glycolaldehyde	C00266	cpd00229	C2H4O2	0	GLYCOLALDEHYDE	gcald_c	HMDB03344	MNXM349	756	[]	InChI=1S/C2H4O2/c3-1-2-4/h1,4H,2H2	WGCNASOHLSPBMP-UHFFFAOYSA-N	CHEBI:17071	SBO:0000247
234	oaa[c]	Oxaloacetate	C00036	cpd00032	C4H2O5	-2	OXALACETIC_ACID	oaa_c	HMDB00223	MNXM46	164550	[]	InChI=1S/C4H4O5/c5-2(4(8)9)1-3(6)7/h1H2,(H,6,7)(H,8,9)/p-2	KHPXUQMNIQBQEV-UHFFFAOYSA-L	CHEBI:16452	SBO:0000247
235	cit[c]	Citrate	C00158	cpd00137	C6H5O7	-3	CIT	cit_c	HMDB00094	MNXM131	31348	[]	InChI=1S/C6H8O7/c7-3(8)1-6(13,5(11)12)2-4(9)10/h13H,1-2H2,(H,7,8)(H,9,10)(H,11,12)/p-3	KRKNYBCHXYNGOX-UHFFFAOYSA-K	CHEBI:16947	SBO:0000247
236	grdp[c]	Geranyl diphosphate	C00341	cpd00283	C10H18O7P2	-2	GERANYL-PP	grdp_c	HMDB01285	MNXM100	19379894	191409	InChI=1S/C10H20O7P2/c1-9(2)5-4-6-10(3)7-8-16-19(14,15)17-18(11,12)13/h5,7H,4,6,8H2,1-3H3,(H,14,15)(H2,11,12,13)/p-3/b10-7+	GVVPGTZRZFNKDS-JXMROGBWSA-K	CHEBI:58057	SBO:0000247
237	frdp[c]	Farnesyl diphosphate	C00448	cpd00350	C15H26O7P2	-3	FARNESYL-PP	frdp_c	HMDB00961	MNXM34	15983959	[]	InChI=1S/C15H28O7P2/c1-13(2)7-5-8-14(3)9-6-10-15(4)11-12-21-24(19,20)22-23(16,17)18/h7,9,11H,5-6,8,10,12H2,1-4H3,(H,19,20)(H2,16,17,18)/p-3/b14-9+,15-11+	VWFJDQUYCIWHTN-YFVJMOTDSA-K	CHEBI:175763	SBO:0000247
238	btcoa[c]	Butanoyl-CoA	C00136	cpd00120	C25H39N7O17P3S	-3	BUTYRYL-COA	btcoa_c	HMDB01088	MNXM233	25244513	77318	InChI=1S/C25H42N7O17P3S/c1-4-5-16(34)53-9-8-27-15(33)6-7-28-23(37)20(36)25(2,3)11-46-52(43,44)49-51(41,42)45-10-14-19(48-50(38,39)40)18(35)24(47-14)32-13-31-17-21(26)29-12-30-22(17)32/h12-14,18-20,24,35-36H,4-11H2,1-3H3,(H,27,33)(H,28,37)(H,41,42)(H,43,44)(H2,26,29,30)(H2,38,39,40)/p-4/t14-,18-,19-,20+,24-/m1/s1	CRFNGMNYKDXRTN-CITAKDKDSA-J	CHEBI:57371	SBO:0000247
239	3ohcoa[c]	3-Oxohexanoyl-CoA	C05269	cpd03123	C27H41N7O18P3S	-3	K-HEXANOYL-COA	3ohcoa_c	HMDB03943	MNXM717	53239804	77320	InChI=1S/C27H44N7O18P3S/c1-4-5-15(35)10-18(37)56-9-8-29-17(36)6-7-30-25(40)22(39)27(2,3)12-49-55(46,47)52-54(44,45)48-11-16-21(51-53(41,42)43)20(38)26(50-16)34-14-33-19-23(28)31-13-32-24(19)34/h13-14,16,20-22,26,38-39H,4-12H2,1-3H3,(H,29,36)(H,30,40)(H,44,45)(H,46,47)(H2,28,31,32)(H2,41,42,43)/p-4/t16-,20-,21-,22+,26-/m1/s1	NFOYYXQAVVYWKV-HDRQGHTBSA-J	CHEBI:62418	SBO:0000247
240	5aizc[c]	5-amino-1-(5-phospho-D-ribosyl)imidazole-4-carboxylate	C04751	cpd02893	C9H13N3O9P	-1	PHOSPHORIBOSYL-CARBOXY-AMINOIMIDAZOLE	5aizc_c	HMDB06273	MNXM507	24916886	111395	InChI=1S/C9H14N3O9P/c10-7-4(9(15)16)11-2-12(7)8-6(14)5(13)3(21-8)1-20-22(17,18)19/h2-3,5-6,8,13-14H,1,10H2,(H,15,16)(H2,17,18,19)/p-3/t3-,5-,6-,8-/m1/s1	XFVULMDJZXYMSG-ZIYNGMLESA-K	CHEBI:58564	SBO:0000247
241	malcoa[c]	Malonyl_CoA	C00083	cpd00070	C24H34N7O19P3S	-4	MALONYL-COA	malcoa_c	HMDB01175	MNXM40	45266608	[]	InChI=1S/C24H38N7O19P3S/c1-24(2,19(37)22(38)27-4-3-13(32)26-5-6-54-15(35)7-14(33)34)9-47-53(44,45)50-52(42,43)46-8-12-18(49-51(39,40)41)17(36)23(48-12)31-11-30-16-20(25)28-10-29-21(16)31/h10-12,17-19,23,36-37H,3-9H2,1-2H3,(H,26,32)(H,27,38)(H,33,34)(H,42,43)(H,44,45)(H2,25,28,29)(H2,39,40,41)/p-5/t12-,17-,18-,19+,23-/m1/s1	LTYOQGRJFJAKNA-DVVLENMVSA-I	CHEBI:57384	SBO:0000247
242	msa[c]	Malonate semialdehyde	C00222	cpd00191	C3H3O3	-1	MALONATE-S-ALD	msa_c	HMDB11111	MNXM244	9543142	909783	InChI=1S/C3H4O3/c4-2-1-3(5)6/h2H,1H2,(H,5,6)/p-1	OAKURXIZZOAYBC-UHFFFAOYSA-M	CHEBI:33190	SBO:0000247
243	prlp[c]	5-[(5-phospho-1-deoxyribulos-1-ylamino)methylideneamino]-1-(5-phosphoribosyl)imidazole-4-carboxamide	C04916	cpd02991	C15H23N5O15P2	-2	PHOSPHORIBULOSYL-FORMIMINO-AICAR-P	prlp_c	HMDB12278	MNXM1408	45266672	[]	InChI=1S/C15H25N5O15P2/c16-13(26)9-14(18-4-17-1-6(21)10(23)7(22)2-33-36(27,28)29)20(5-19-9)15-12(25)11(24)8(35-15)3-34-37(30,31)32/h4-5,7-8,10-12,15,22-25H,1-3H2,(H2,16,26)(H,17,18)(H2,27,28,29)(H2,30,31,32)/p-4/t7-,8-,10+,11-,12-,15-/m1/s1	BLKFNHOCHNCLII-GHVQHMAVSA-J	CHEBI:58525	SBO:0000247
244	eig3p[c]	D-erythro-1-(Imidazol-4-yl)glycerol 3-phosphate	C04666	cpd02843	C6H10N2O6P	-1	D-ERYTHRO-IMIDAZOLE-GLYCEROL-P	eig3p_c	HMDB12208	MNXM1422	5459954	[]	InChI=1S/C6H11N2O6P/c9-5(2-14-15(11,12)13)6(10)4-1-7-3-8-4/h1,3,5-6,9-10H,2H2,(H,7,8)(H2,11,12,13)/p-2/t5-,6+/m1/s1	HFYBTHCYPKEDQQ-RITPCOANSA-L	CHEBI:58278	SBO:0000247
245	3hddcoa[c]	(S)-3-Hydroxydodecanoyl-CoA	C05262	cpd03116	C33H55N7O18P3S	-3	CPD0-2107	3hddcoa_c	HMDB03936	MNXM733	46173081	77252	InChI=1S/C33H58N7O18P3S/c1-4-5-6-7-8-9-10-11-21(41)16-24(43)62-15-14-35-23(42)12-13-36-31(46)28(45)33(2,3)18-55-61(52,53)58-60(50,51)54-17-22-27(57-59(47,48)49)26(44)32(56-22)40-20-39-25-29(34)37-19-38-30(25)40/h19-22,26-28,32,41,44-45H,4-18H2,1-3H3,(H,35,42)(H,36,46)(H,50,51)(H,52,53)(H2,34,37,38)(H2,47,48,49)/p-4/t21-,22+,26+,27+,28-,32+/m0/s1	IJFLXRCJWPKGKJ-LXIXEQKWSA-J	CHEBI:62558	SBO:0000247
246	3oddcoa[c]	3-Oxododecanoyl-CoA	C05263	cpd03117	C33H53N7O18P3S	-3	CPD0-2105	3oddcoa_c	HMDB03937	MNXM705	46173506	77253	InChI=1S/C33H56N7O18P3S/c1-4-5-6-7-8-9-10-11-21(41)16-24(43)62-15-14-35-23(42)12-13-36-31(46)28(45)33(2,3)18-55-61(52,53)58-60(50,51)54-17-22-27(57-59(47,48)49)26(44)32(56-22)40-20-39-25-29(34)37-19-38-30(25)40/h19-20,22,26-28,32,44-45H,4-18H2,1-3H3,(H,35,42)(H,36,46)(H,50,51)(H,52,53)(H2,34,37,38)(H2,47,48,49)/p-4/t22-,26-,27-,28+,32-/m1/s1	HQANBZHVWIDNQZ-GMHMEAMDSA-J	CHEBI:62615	SBO:0000247
247	23dhmp[c]	(R)-2,3-Dihydroxy-3-methylpentanoate	C06007	cpd02535	C6H11O4	-1	1-KETO-2-METHYLVALERATE	23dhmp_c	HMDB12140	MNXM1202	21145376	[]	InChI=1S/C6H12O4/c1-3-6(2,10)4(7)5(8)9/h4,7,10H,3H2,1-2H3,(H,8,9)/p-1/t4-,6+/m0/s1	PDGXJDXVGMHUIR-UJURSFKZSA-M	CHEBI:49258	SBO:0000247
248	3oddecACP[c]	3-Oxododecanoyl-[acyl-carrier protein]	C05756	cpd11489	C23H40N2O8PSR	-1	3-oxo-dodecanoyl-ACPs	3oddecACP_c	[]	MNXM28933	[]	[]	[]	[]	CHEBI:1637	SBO:0000247
249	3hddecACP[c]	(R)-3-Hydroxydodecanoyl-[acyl-carrier protein]	C05757	cpd11480	C23H42N2O8PSR	-1	[]	3hddecACP_c	[]	[]	[]	[]	[]	[]	CHEBI:325	SBO:0000247
250	5aop[c]	5-Amino-4-oxopentanoate	C00430	cpd00338	C5H9NO3	0	5-AMINO-LEVULINATE	5aop_c	HMDB01149	MNXM405	7048523	[]	InChI=1S/C5H9NO3/c6-3-4(7)1-2-5(8)9/h1-3,6H2,(H,8,9)	ZGXJTSGNIOSYLO-UHFFFAOYSA-N	CHEBI:356416	SBO:0000247
251	ppbng[c]	Porphobilinogen	C00931	cpd00689	C10H13N2O4	-1	PORPHOBILINOGEN	ppbng_c	HMDB00245	MNXM554	6921588	189464	InChI=1S/C10H14N2O4/c11-4-8-7(3-10(15)16)6(5-12-8)1-2-9(13)14/h5,12H,1-4,11H2,(H,13,14)(H,15,16)/p-1	QSHWIQZFGQKFMA-UHFFFAOYSA-M	CHEBI:58126	SBO:0000247
252	3pg[c]	3-Phospho-D-glycerate	C00197	cpd00169	C3H4O7P	-3	G3P	3pg_c	HMDB60180	MNXM126	25245548	[]	InChI=1S/C3H7O7P/c4-2(3(5)6)1-10-11(7,8)9/h2,4H,1H2,(H,5,6)(H2,7,8,9)/p-3/t2-/m1/s1	OSJPPGNTCRNQQC-UWTATZPHSA-K	CHEBI:58272	SBO:0000247
253	13dpg[c]	3-Phospho-D-glyceroyl phosphate	C00236	cpd00203	C3H6O10P2	-2	DPG	13dpg_c	HMDB01270	MNXM261	46878409	29800	InChI=1S/C3H8O10P2/c4-2(1-12-14(6,7)8)3(5)13-15(9,10)11/h2,4H,1H2,(H2,6,7,8)(H2,9,10,11)/p-4/t2-/m1/s1	LJQLQCAXBUHEAZ-UWTATZPHSA-J	CHEBI:57604	SBO:0000247
254	anth[c]	Anthranilate	C00108	cpd00093	C7H6NO2	-1	ANTHRANILATE	anth_c	HMDB01123	MNXM188	5459842	[]	InChI=1S/C7H7NO2/c8-6-4-2-1-3-5(6)7(9)10/h1-4H,8H2,(H,9,10)/p-1	RWZYAGGXGHYGMB-UHFFFAOYSA-M	CHEBI:16567	SBO:0000247
255	pran[c]	N-(5-Phospho-D-ribosyl)anthranilate	C04302	cpd02642	C12H14NO9P	-2	N-5-PHOSPHORIBOSYL-ANTHRANILATE	pran_c	[]	MNXM1489	9548600	[]	InChI=1S/C12H16NO9P/c14-9-8(5-21-23(18,19)20)22-11(10(9)15)13-7-4-2-1-3-6(7)12(16)17/h1-4,8-11,13-15H,5H2,(H,16,17)(H2,18,19,20)/p-3/t8-,9-,10-,11-/m1/s1	PMFMJXPRNJUYMB-GWOFURMSSA-K	CHEBI:18277	SBO:0000247
256	actp[c]	Acetyl phosphate	C00227	cpd00196	C2H4O5P	-1	ACETYL-P	actp_c	HMDB01494	MNXM280	4183249	[]	InChI=1S/C2H5O5P/c1-2(3)7-8(4,5)6/h1H3,(H2,4,5,6)/p-2	LIPOUNRJVLNBCD-UHFFFAOYSA-L	CHEBI:22191	SBO:0000247
257	5mcsn[c]	5-Methylcytosine	C02376	cpd01587	C5H7N3O	0	CPD0-2018	5mcsn_c	HMDB02894	MNXM3509	65040	[]	InChI=1S/C5H7N3O/c1-3-2-7-5(9)8-4(3)6/h2H,1H3,(H3,6,7,8,9)	LRSASMSXMSNRBT-UHFFFAOYSA-N	CHEBI:27551	SBO:0000247
258	thym[c]	Thymine	C00178	cpd00151	C5H6N2O2	0	THYMINE	thym_c	HMDB00262	MNXM386	1135	83960	InChI=1S/C5H6N2O2/c1-3-2-6-5(9)7-4(3)8/h2H,1H3,(H2,6,7,8,9)	RWQNBRDOKXIBIV-UHFFFAOYSA-N	CHEBI:17821	SBO:0000247
259	2ins[c]	2-Inosose	C00691	cpd00524	C6H10O6	0	CPD-14808	2ins_c	[]	MNXM676	439294	[]	InChI=1S/C6H10O6/c7-1-2(8)4(10)6(12)5(11)3(1)9/h1-5,7-11H/t1-,2-,3+,4+,5-	VYEGBDHSGHXOGT-HYFGLKJPSA-N	CHEBI:81197	SBO:0000247
260	dkdi[c]	3,5/4-trihydroxycyclohexa-1,2-dione	C04287	cpd02631	C6H8O5	0	CPD-1133	dkdi_c	[]	MNXM114119	24771766	[]	InChI=1S/C6H8O5/c7-2-1-3(8)5(10)6(11)4(2)9/h2,4,6-7,9,11H,1H2/t2-,4+,6-/m1/s1	SHFQRUVRUBHHRE-CJPQEGFPSA-N	CHEBI:28446	SBO:0000247
261	3aib__D[c]	D-3-Amino-isobutanoate	C01205	cpd00886	C4H9NO2	0	CPD-471	3aib__D_c	HMDB02299	MNXM786	6971064	[]	InChI=1S/C4H9NO2/c1-3(2-5)4(6)7/h3H,2,5H2,1H3,(H,6,7)/t3-/m1/s1	QCHPKSFMDHPSNR-GSVOUGTGSA-N	CHEBI:57731	SBO:0000247
262	hexACP[c]	Hexanoyl-ACP (n-C6:0ACP)	C05749	cpd11472	C17H30N2O7PSR	-1	Hexanoyl-ACPs	hexACP_c	[]	MNXM23683	[]	[]	[]	[]	CHEBI:5704	SBO:0000247
263	3ooctACP[c]	3-Oxooctanoyl-[acyl-carrier protein]	C05750	cpd11490	C19H32N2O8PSR	-1	3-Oxo-octanoyl-ACPs	3ooctACP_c	[]	MNXM28031	[]	[]	[]	[]	CHEBI:1646	SBO:0000247
264	4abut[c]	4-Aminobutanoate	C00334	cpd00281	C4H9NO2	0	4-AMINO-BUTYRATE	4abut_c	HMDB00112	MNXM192	6992099	[]	InChI=1S/C4H9NO2/c5-3-1-2-4(6)7/h1-3,5H2,(H,6,7)	BTCSSZJGUNDROE-UHFFFAOYSA-N	CHEBI:59888	SBO:0000247
265	sucsal[c]	Succinic semialdehyde	C00232	cpd00199	C4H5O3	-1	SUCC-S-ALD	sucsal_c	HMDB01259	MNXM172	9543238	880046	InChI=1S/C4H6O3/c5-3-1-2-4(6)7/h3H,1-2H2,(H,6,7)/p-1	UIUJIQZEACWQSV-UHFFFAOYSA-M	CHEBI:57706	SBO:0000247
266	butACP[c]	Butyryl-ACP (n-C4:0ACP)	C05745	cpd11464	C15H26N2O7PSR	-1	Butanoyl-ACPs	butACP_c	[]	MNXM2645	[]	[]	[]	[]	CHEBI:3247	SBO:0000247
267	3ohexACP[c]	3-Oxohexanoyl-[acyl-carrier protein]	C05746	cpd11486	C17H28N2O8PSR	-1	3-oxo-hexanoyl-ACPs	3ohexACP_c	[]	MNXM25602	[]	[]	[]	[]	CHEBI:1642	SBO:0000247
268	dtdp[c]	dTDP	C00363	cpd00297	C10H14N2O11P2	-2	TDP	dtdp_c	HMDB01274	MNXM152	21124327	[]	InChI=1S/C10H16N2O11P2/c1-5-3-12(10(15)11-9(5)14)8-2-6(13)7(22-8)4-21-25(19,20)23-24(16,17)18/h3,6-8,13H,2,4H2,1H3,(H,19,20)(H,11,14,15)(H2,16,17,18)/p-3/t6-,7+,8+/m0/s1	UJLXYODCHAELLY-XLPZGREQSA-K	CHEBI:58369	SBO:0000247
269	dttp[c]	dTTP	C00459	cpd00357	C10H14N2O14P3	-3	TTP	dttp_c	HMDB01342	MNXM394	11988283	[]	InChI=1S/C10H17N2O14P3/c1-5-3-12(10(15)11-9(5)14)8-2-6(13)7(24-8)4-23-28(19,20)26-29(21,22)25-27(16,17)18/h3,6-8,13H,2,4H2,1H3,(H,19,20)(H,21,22)(H,11,14,15)(H2,16,17,18)/p-4/t6-,7+,8+/m0/s1	NHVNXKFIZYSCEB-XLPZGREQSA-J	CHEBI:37568	SBO:0000247
270	dmpp[c]	Dimethylallyl diphosphate	C00235	cpd00202	C5H10O7P2	-2	CPD-4211	dmpp_c	HMDB01120	MNXM132	15983958	[]	InChI=1S/C5H12O7P2/c1-5(2)3-4-11-14(9,10)12-13(6,7)8/h3H,4H2,1-2H3,(H,9,10)(H2,6,7,8)/p-3	CBIDRCWHNCKSTO-UHFFFAOYSA-K	CHEBI:57623	SBO:0000247
271	acg5sa[c]	N-Acetyl-L-glutamate 5-semialdehyde	C01250	cpd00918	C7H10NO4	-1	CPD-469	acg5sa_c	HMDB06488	MNXM1062	6857435	[]	InChI=1S/C7H11NO4/c1-5(10)8-6(7(11)12)3-2-4-9/h4,6H,2-3H2,1H3,(H,8,10)(H,11,12)/p-1/t6-/m0/s1	BCPSFKBPHHBDAI-LURJTMIESA-M	CHEBI:29123	SBO:0000247
272	cbl1[e]	Cob(I)alamin	C00853	cpd00635	C62H89N13O14PCo	0	COB-I-ALAMIN	cbl1_e	HMDB03429	MNXM91519	5460183	3159260	InChI=1S/C62H90N13O14P.Co/c1-29-20-39-40(21-30(29)2)75(28-70-39)57-52(84)53(41(27-76)87-57)89-90(85,86)88-31(3)26-69-49(83)18-19-59(8)37(22-46(66)80)56-62(11)61(10,25-48(68)82)36(14-17-45(65)79)51(74-62)33(5)55-60(9,24-47(67)81)34(12-15-43(63)77)38(71-55)23-42-58(6,7)35(13-16-44(64)78)50(72-42)32(4)54(59)73-56;/h20-21,23,28,31,34-37,41,52-53,56-57,76,84H,12-19,22,24-27H2,1-11H3,(H15,63,64,65,66,6…	OMAOKVYASDIYQG-DSRCUDDDSA-L	CHEBI:15982	SBO:0000247
273	cbl1[c]	Cob(I)alamin	C00853	cpd00635	C62H89N13O14PCo	0	COB-I-ALAMIN	cbl1_c	HMDB03429	MNXM91519	5460183	3159260	InChI=1S/C62H90N13O14P.Co/c1-29-20-39-40(21-30(29)2)75(28-70-39)57-52(84)53(41(27-76)87-57)89-90(85,86)88-31(3)26-69-49(83)18-19-59(8)37(22-46(66)80)56-62(11)61(10,25-48(68)82)36(14-17-45(65)79)51(74-62)33(5)55-60(9,24-47(67)81)34(12-15-43(63)77)38(71-55)23-42-58(6,7)35(13-16-44(64)78)50(72-42)32(4)54(59)73-56;/h20-21,23,28,31,34-37,41,52-53,56-57,76,84H,12-19,22,24-27H2,1-11H3,(H15,63,64,65,66,6…	OMAOKVYASDIYQG-DSRCUDDDSA-L	CHEBI:15982	SBO:0000247
274	dpcoa[c]	Dephospho-CoA	C00882	cpd00655	C21H33N7O13P2S	-2	DEPHOSPHO-COA	dpcoa_c	HMDB01373	MNXM481	45266562	196778	InChI=1S/C21H35N7O13P2S/c1-21(2,16(32)19(33)24-4-3-12(29)23-5-6-44)8-39-43(36,37)41-42(34,35)38-7-11-14(30)15(31)20(40-11)28-10-27-13-17(22)25-9-26-18(13)28/h9-11,14-16,20,30-32,44H,3-8H2,1-2H3,(H,23,29)(H,24,33)(H,34,35)(H,36,37)(H2,22,25,26)/p-2/t11-,14-,15-,16+,20-/m1/s1	KDTSHFARGAKYJN-IBOSZNHHSA-L	CHEBI:57328	SBO:0000247
275	acon_C[c]	cis-Aconitate	C00417	cpd00331	C6H3O6	-3	CIS-ACONITATE	acon_C_c	HMDB00072	MNXM813	5459816	[]	InChI=1S/C6H6O6/c7-4(8)1-3(6(11)12)2-5(9)10/h1H,2H2,(H,7,8)(H,9,10)(H,11,12)/p-3/b3-1-	GTZCVFVGUGFEME-IWQZZHSRSA-K	CHEBI:16383	SBO:0000247
276	icit[c]	Isocitrate	C00311	cpd00260	C6H5O7	-3	Isocitrate	icit_c	[]	[]	5460172	[]	InChI=1S/C6H8O7/c7-3(8)1-2(5(10)11)4(9)6(12)13/h2,4,9H,1H2,(H,7,8)(H,10,11)(H,12,13)/p-3	ODBLHEXUDAPZAU-UHFFFAOYSA-K	CHEBI:16087	SBO:0000247
277	cytd[c]	Cytidine	C00475	cpd00367	C9H13N3O5	0	CYTIDINE	cytd_c	HMDB00089	MNXM338	6175	[]	InChI=1S/C9H13N3O5/c10-5-1-2-12(9(16)11-5)8-7(15)6(14)4(3-13)17-8/h1-2,4,6-8,13-15H,3H2,(H2,10,11,16)/t4-,6-,7-,8-/m1/s1	UHDGCWIWMRVCDJ-XVFCMESISA-N	CHEBI:17562	SBO:0000247
278	uri[c]	Uridine	C00299	cpd00249	C9H12N2O6	0	URIDINE	uri_c	HMDB00296	MNXM288	6029	[]	InChI=1S/C9H12N2O6/c12-3-4-6(14)7(15)8(17-4)11-2-1-5(13)10-9(11)16/h1-2,4,6-8,12,14-15H,3H2,(H,10,13,16)/t4-,6-,7-,8-/m1/s1	DRTQHJPVMGBUCF-XVFCMESISA-N	CHEBI:16704	SBO:0000247
279	quln[c]	Quinolinate	C03722	cpd02333	C7H3NO4	-2	QUINOLINATE	quln_c	HMDB00232	MNXM555	5460301	197238	InChI=1S/C7H5NO4/c9-6(10)4-2-1-3-8-5(4)7(11)12/h1-3H,(H,9,10)(H,11,12)/p-2	GJAWHXHKYYXBSV-UHFFFAOYSA-L	CHEBI:29959	SBO:0000247
280	dhf[c]	7,8-Dihydrofolate	C00415	cpd00330	C19H19N7O6	-2	DIHYDROFOLATE	dhf_c	HMDB01056	MNXM281	40480038	73604	InChI=1S/C19H21N7O6/c20-19-25-15-14(17(30)26-19)23-11(8-22-15)7-21-10-3-1-9(2-4-10)16(29)24-12(18(31)32)5-6-13(27)28/h1-4,12,21H,5-8H2,(H,24,29)(H,27,28)(H,31,32)(H4,20,22,25,26,30)/p-2/t12-/m0/s1	OZRNSSUDZOLUSN-LBPRGKRZSA-L	CHEBI:57451	SBO:0000247
281	3hpalmACP[c]	R-3-hydroxypalmitoyl-[acyl-carrier protein]	C04633	cpd11481	C27H50N2O8PSR	-1	R-3-Hydroxypalmitoyl-ACPs	3hpalmACP_c	[]	MNXM12847	[]	[]	[]	[]	[]	SBO:0000247
282	tpalm2eACP[c]	trans-Hexadec-2-enoyl-[acyl-carrier protein]	C05763	cpd11477	C27H48N2O7PSR	-1	2-Hexadecenoyl-ACPs	tpalm2eACP_c	[]	MNXM29072	[]	[]	[]	[]	CHEBI:10729	SBO:0000247
283	arg__L[c]	L-Arginine	C00062	cpd00051	C6H15N4O2	1	ARG	arg__L_c	HMDB00517	MNXM70	1549073	[]	InChI=1S/C6H14N4O2/c7-4(5(11)12)2-1-3-10-6(8)9/h4H,1-3,7H2,(H,11,12)(H4,8,9,10)/p+1/t4-/m0/s1	ODKSFYDXXFIFQN-BYPYZUCNSA-O	CHEBI:32682	SBO:0000247
284	citr__L[c]	L-Citrulline	C00327	cpd00274	C6H13N3O3	0	L-CITRULLINE	citr__L_c	HMDB00904	MNXM211	6992098	[]	InChI=1S/C6H13N3O3/c7-4(5(10)11)2-1-3-9-6(8)12/h4H,1-3,7H2,(H,10,11)(H3,8,9,12)/t4-/m0/s1	RHGKLRLOHDJJDR-BYPYZUCNSA-N	CHEBI:57743	SBO:0000247
285	prfp[c]	1-(5-Phosphoribosyl)-5-[(5-phosphoribosylamino)methylideneamino]imidazole-4-carboxamide	C04896	cpd02979	C15H23N5O15P2	-2	PHOSPHORIBOSYL-FORMIMINO-AICAR-P	prfp_c	HMDB12277	MNXM1397	45266644	[]	InChI=1S/C15H25N5O15P2/c16-12(25)7-13(17-3-18-14-10(23)8(21)5(34-14)1-32-36(26,27)28)20(4-19-7)15-11(24)9(22)6(35-15)2-33-37(29,30)31/h3-6,8-11,14-15,21-24H,1-2H2,(H2,16,25)(H,17,18)(H2,26,27,28)(H2,29,30,31)/p-4/t5-,6-,8-,9-,10-,11-,14-,15-/m1/s1	QOUSHGMTBIIAHR-KEOHHSTQSA-J	CHEBI:58435	SBO:0000247
286	4abz[c]	4-Aminobenzoate	C00568	cpd00443	C7H6NO2	-1	P-AMINO-BENZOATE	4abz_c	HMDB01392	MNXM421	4876	[]	InChI=1S/C7H7NO2/c8-6-3-1-5(2-4-6)7(9)10/h1-4H,8H2,(H,9,10)/p-1	ALYNCZNDIQEVRV-UHFFFAOYSA-M	CHEBI:17836	SBO:0000247
287	dhpt[c]	Dihydropteroate	C00921	cpd00683	C14H13N6O3	-1	7-8-DIHYDROPTEROATE	dhpt_c	HMDB01412	MNXM722728	5459950	[]	InChI=1S/C14H14N6O3/c15-14-19-11-10(12(21)20-14)18-9(6-17-11)5-16-8-3-1-7(2-4-8)13(22)23/h1-4,16H,5-6H2,(H,22,23)(H4,15,17,19,20,21)/p-1	WBFYVDCHGVNRBH-UHFFFAOYSA-M	CHEBI:17839	SBO:0000247
288	6pgc[c]	6-Phospho-D-gluconate	C00345	cpd00284	C6H11O10P	-2	CPD-2961	6pgc_c	HMDB01316	MNXM325	36688186	29996	InChI=1S/C6H13O10P/c7-2(1-16-17(13,14)15)3(8)4(9)5(10)6(11)12/h2-5,7-10H,1H2,(H,11,12)(H2,13,14,15)/p-3/t2-,3-,4+,5-/m1/s1	BIRSGZKFKXLSJQ-SQOUGZDYSA-K	CHEBI:58759	SBO:0000247
289	tdec2eACP[c]	trans-Dec-2-enoyl-[acyl-carrier protein]	C05754	cpd11475	C21H36N2O7PSR	-1	[]	tdec2eACP_c	[]	[]	[]	[]	[]	[]	CHEBI:10724	SBO:0000247
290	25drapp[c]	2,5-Diamino-6-hydroxy-4-(5-phosphoribosylamino)-pyrimidine	C01304	cpd00957	C9H15N5O8P	-1	DIAMINO-OH-PHOSPHORIBOSYLAMINO-PYR	25drapp_c	[]	MNXM648	25244331	[]	InChI=1S/C9H16N5O8P/c10-3-6(13-9(11)14-7(3)17)12-8-5(16)4(15)2(22-8)1-21-23(18,19)20/h2,4-5,8,15-16H,1,10H2,(H2,18,19,20)(H4,11,12,13,14,17)/p-2/t2-,4-,5-,8-/m1/s1	OCLCLRXKNJCOJD-UMMCILCDSA-L	CHEBI:29114	SBO:0000247
291	apoACP[c]	apoprotein [acyl carrier protein]	C03688	cpd12370	R	0	apo-ACP	apoACP_c	[]	MNXM91491	[]	[]	[]	[]	CHEBI:16139	SBO:0000247
292	pap[c]	Adenosine 3,5-bisphosphate	C00054	cpd00045	C10H13N5O10P2	-2	3-5-ADP	pap_c	HMDB00061	MNXM45	23615194	[]	InChI=1S/C10H15N5O10P2/c11-8-5-9(13-2-12-8)15(3-14-5)10-6(16)7(25-27(20,21)22)4(24-10)1-23-26(17,18)19/h2-4,6-7,10,16H,1H2,(H2,11,12,13)(H2,17,18,19)(H2,20,21,22)/p-4/t4-,6-,7-,10-/m1/s1	WHTCPDAXWFLDIH-KQYNXXCUSA-J	CHEBI:58343	SBO:0000247
293	tddec2eACP[c]	trans-Dodec-2-enoyl-[acyl-carrier protein]	C05758	cpd11469	C23H40N2O7PSR	-1	Dodec-2-enoyl-ACPs	tddec2eACP_c	[]	MNXM23842	[]	[]	[]	[]	CHEBI:10725	SBO:0000247
294	ddcaACP[c]	Dodecanoyl-ACP (n-C12:0ACP)	C05223	cpd11468	C23H42N2O7PSR	-1	Dodecanoyl-ACPs	ddcaACP_c	[]	MNXM5723	[]	[]	[]	[]	CHEBI:65283	SBO:0000247
295	dna[c]	DNA	C00039	cpd11461	R	-2	DNA-N	dna_c	[]	MNXM162317	[]	[]	[]	[]	CHEBI:16991	SBO:0000247
296	dna5mtc[c]	DNA 5-methylcytosine	C02967	cpd12223	CH2R	-2	5-Methylcytosine-DNA	dna5mtc_c	[]	MNXM14908	[]	[]	[]	[]	[]	SBO:0000247
297	frmd[c]	Formamide	C00488	cpd00378	CH3NO	0	FORMAMIDE	frmd_c	HMDB01536	MNXM1231	713	[]	InChI=1S/CH3NO/c2-1-3/h1H,(H2,2,3)	ZHNUHDYFZUAESO-UHFFFAOYSA-N	CHEBI:16397	SBO:0000247
298	26dap_LL[c]	LL-2,6-Diaminoheptanedioate	C00666	cpd00504	C7H14N2O4	0	LL-DIAMINOPIMELATE	26dap_LL_c	HMDB01370	MNXM644	1549100	[]	InChI=1S/C7H14N2O4/c8-4(6(10)11)2-1-3-5(9)7(12)13/h4-5H,1-3,8-9H2,(H,10,11)(H,12,13)/t4-,5-/m0/s1	GMKMEZVLHJARHF-WHFBIAKZSA-N	CHEBI:57609	SBO:0000247
299	3hoctACP[c]	(R)-3-Hydroxyoctanoyl-[acyl-carrier protein]	C04620	cpd11483	C19H34N2O8PSR	-1	3-Hydroxy-octanoyl-ACPs	3hoctACP_c	[]	MNXM10019	[]	[]	[]	[]	[]	SBO:0000247
300	val__L[c]	L-Valine	C00183	cpd00156	C5H11NO2	0	VAL	val__L_c	HMDB00883	MNXM199	6971018	[]	InChI=1S/C5H11NO2/c1-3(2)4(6)5(7)8/h3-4H,6H2,1-2H3,(H,7,8)/t4-/m0/s1	KZSNJWFQEVHDMF-BYPYZUCNSA-N	CHEBI:57762	SBO:0000247
301	udp[c]	UDP	C00015	cpd00014	C9H12N2O12P2	-2	UDP	udp_c	HMDB00295	MNXM17	20056717	[]	InChI=1S/C9H14N2O12P2/c12-5-1-2-11(9(15)10-5)8-7(14)6(13)4(22-8)3-21-25(19,20)23-24(16,17)18/h1-2,4,6-8,13-14H,3H2,(H,19,20)(H,10,12,15)(H2,16,17,18)/p-3/t4-,6-,7-,8-/m1/s1	XCCTYIAWTASOJW-XVFCMESISA-K	CHEBI:58223	SBO:0000247
302	but2eACP[c]	But-2-enoyl-[acyl-carrier protein]	C04246	cpd11465	C15H24N2O7PSR	-1	[]	but2eACP_c	[]	[]	[]	[]	[]	[]	[]	SBO:0000247
303	3hmrsACP[c]	(R)-3-Hydroxytetradecanoyl-[acyl-carrier protein]	C04688	cpd11484	C25H46N2O8PSR	-1	R-3-hydroxymyristoyl-ACPs	3hmrsACP_c	[]	MNXM7733	[]	[]	[]	[]	[]	SBO:0000247
304	leu__L[c]	L-Leucine	C00123	cpd00107	C6H13NO2	0	LEU	leu__L_c	HMDB00687	MNXM140	7045798	[]	InChI=1S/C6H13NO2/c1-4(2)3-5(7)6(8)9/h4-5H,3,7H2,1-2H3,(H,8,9)/t5-/m0/s1	ROHFNLRQFUQHCH-YFKPBYRVSA-N	CHEBI:57427	SBO:0000247
305	mlthf[c]	5,10-Methylenetetrahydrofolate	C00143	cpd00125	C20H21N7O6	-2	METHYLENE-THF	mlthf_c	HMDB01533	MNXM183	9548565	[]	InChI=1S/C20H23N7O6/c21-20-24-16-15(18(31)25-20)27-9-26(8-12(27)7-22-16)11-3-1-10(2-4-11)17(30)23-13(19(32)33)5-6-14(28)29/h1-4,12-13H,5-9H2,(H,23,30)(H,28,29)(H,32,33)(H4,21,22,24,25,31)/p-2/t12-,13+/m1/s1	QYNUQALWYRSVHF-OLZOCXBDSA-L	CHEBI:15636	SBO:0000247
306	dtmp[c]	dTMP	C00364	cpd00298	C10H14N2O8P	-1	TMP	dtmp_c	HMDB01227	MNXM257	16755631	109366	InChI=1S/C10H15N2O8P/c1-5-3-12(10(15)11-9(5)14)8-2-6(13)7(20-8)4-19-21(16,17)18/h3,6-8,13H,2,4H2,1H3,(H,11,14,15)(H2,16,17,18)/p-2/t6-,7+,8+/m0/s1	GYOZYWVXFNDGLU-XLPZGREQSA-L	CHEBI:63528	SBO:0000247
307	pydx[c]	Pyridoxal	C00250	cpd00215	C8H9NO3	0	PYRIDOXAL	pydx_c	HMDB01545	MNXM311	1050	965131	InChI=1S/C8H9NO3/c1-5-8(12)7(4-11)6(3-10)2-9-5/h2,4,10,12H,3H2,1H3	RADKZDMFGJYCBB-UHFFFAOYSA-N	CHEBI:17310	SBO:0000247
308	2aobut[c]	L-2-Amino-3-oxobutanoate	C03508	cpd02211	C4H7NO3	0	AMINO-OXOBUT	2aobut_c	HMDB06454	MNXM114087	86289686	6798652	InChI=1S/C4H7NO3/c1-2(6)3(5)4(7)8/h3H,5H2,1H3,(H,7,8)/t3-/m0/s1	SAUCHDKDCUROAO-VKHMYHEASA-N	CHEBI:78948	SBO:0000247
309	3omrsACP[c]	3-Oxotetradecanoyl-[acyl-carrier protein]	C05759	cpd11491	C25H44N2O8PSR	-1	3-oxo-myristoyl-ACPs	3omrsACP_c	[]	MNXM26095	[]	[]	[]	[]	CHEBI:1655	SBO:0000247
310	glu1sa[c]	L-Glutamate 1-semialdehyde	C03741	cpd02345	C5H9NO3	0	GLUTAMATE-1-SEMIALDEHYDE	glu1sa_c	[]	MNXM1453	25244684	[]	InChI=1S/C5H9NO3/c6-4(3-7)1-2-5(8)9/h3-4H,1-2,6H2,(H,8,9)/t4-/m0/s1	MPUUQNGXJSEWTF-BYPYZUCNSA-N	CHEBI:57501	SBO:0000247
311	lpam[c]	Lipoamide (pyruvate dehydrogenase)	C00248	cpd00213	C8H15NOS2	0	LIPOAMIDE	lpam_c	HMDB00962	MNXM1024	6992093	[]	InChI=1S/C8H15NOS2/c9-8(10)4-2-1-3-7-5-6-11-12-7/h7H,1-6H2,(H2,9,10)/t7-/m1/s1	FCCDDURTIIUXBY-SSDOTTSWSA-N	CHEBI:83094	SBO:0000247
312	h2s[c]	sulfide	C00283	cpd00239	H2S	0	HS	h2s_c	HMDB03276	[]	402	[]	InChI=1S/H2S/h1H2	RWSOTUBLDIXVET-UHFFFAOYSA-N	CHEBI:16136	SBO:0000247
313	phom[c]	O-Phospho-L-homoserine	C01102	cpd00809	C4H9NO6P	-1	O-PHOSPHO-L-HOMOSERINE	phom_c	HMDB03484	MNXM1334	46878406	[]	InChI=1S/C4H10NO6P/c5-3(4(6)7)1-2-11-12(8,9)10/h3H,1-2,5H2,(H,6,7)(H2,8,9,10)/p-2/t3-/m0/s1	FXDNYOANAXWZHG-VKHMYHEASA-L	CHEBI:57590	SBO:0000247
314	toct2eACP[c]	trans-Oct-2-enoyl-[acyl-carrier protein]	C05751	cpd11471	C19H32N2O7PSR	-1	2-Octenoyl-ACPs	toct2eACP_c	[]	MNXM23766	[]	[]	[]	[]	[]	SBO:0000247
315	ocACP[c]	Octanoyl-ACP (n-C8:0ACP)	C05752	cpd11470	C19H34N2O7PSR	-1	Octanoyl-ACPs	ocACP_c	[]	MNXM979	[]	[]	[]	[]	CHEBI:7725	SBO:0000247
316	pan4p[c]	Pantetheine 4-phosphate	C01134	cpd00834	C11H22N2O7PS	-1	PANTETHEINE-P	pan4p_c	HMDB01416	[]	25245905	[]	InChI=1S/C11H23N2O7PS/c1-11(2,7-20-21(17,18)19)9(15)10(16)13-4-3-8(14)12-5-6-22/h9,15,22H,3-7H2,1-2H3,(H,12,14)(H,13,16)(H2,17,18,19)/p-2/t9-/m0/s1	JDMUPRLRUUMCTL-VIFPVBQESA-L	CHEBI:61723	SBO:0000247
317	nmn[c]	Nicotinamide D-ribonucleotide (NMN)	C00455	cpd00355	C11H15N2O8P	0	NICOTINAMIDE_NUCLEOTIDE	nmn_c	HMDB00229	MNXM355	23617374	[]	InChI=1S/C11H15N2O8P/c12-10(16)6-2-1-3-13(4-6)11-9(15)8(14)7(21-11)5-20-22(17,18)19/h1-4,7-9,11,14-15H,5H2,(H3-,12,16,17,18,19)/p-1/t7-,8-,9-,11-/m1/s1	DAYLJWODMCOQEW-TURQNECASA-M	CHEBI:14649	SBO:0000247
318	5apru[c]	5-Amino-6-(5-phosphoribosylamino)uracil	C01268	cpd00931	C9H14N4O9P	-1	CPD-602	5apru_c	[]	MNXM1532	25245199	[]	InChI=1S/C9H15N4O9P/c10-3-6(12-9(17)13-7(3)16)11-8-5(15)4(14)2(22-8)1-21-23(18,19)20/h2,4-5,8,14-15H,1,10H2,(H2,18,19,20)(H3,11,12,13,16,17)/p-2/t2-,4-,5-,8-/m1/s1	LZEXYCAGPMYXLX-UMMCILCDSA-L	CHEBI:58453	SBO:0000247
319	thdp[c]	2,3,4,5-Tetrahydrodipicolinate	C03972	cpd02465	C7H7NO4	-2	DELTA1-PIPERIDEINE-2-6-DICARBOXYLATE	thdp_c	HMDB12289	MNXM480	5460405	[]	InChI=1S/C7H9NO4/c9-6(10)4-2-1-3-5(8-4)7(11)12/h4H,1-3H2,(H,9,10)(H,11,12)/p-2/t4-/m0/s1	CXMBCXQHOXUCEO-BYPYZUCNSA-L	CHEBI:16845	SBO:0000247
320	sl2a6o[c]	N-Succinyl-2-L-amino-6-oxoheptanedioate	C04462	cpd02724	C11H12NO8	-3	N-SUCCINYL-2-AMINO-6-KETOPIMELATE	sl2a6o_c	HMDB12266	MNXM1563	6419713	[]	InChI=1S/C11H15NO8/c13-7(11(19)20)3-1-2-6(10(17)18)12-8(14)4-5-9(15)16/h6H,1-5H2,(H,12,14)(H,15,16)(H,17,18)(H,19,20)/p-3/t6-/m0/s1	SDVXSCSNVVZWDD-LURJTMIESA-K	CHEBI:15685	SBO:0000247
321	glycogen[c]	glycogen	C00182	cpd00155	C30H52O26	0	Glycogens	glycogen_c	HMDB00757	MNXM55375	[]	[]	[]	[]	CHEBI:24384	SBO:0000247
322	hmbil[c]	Hydroxymethylbilane	C01024	cpd00755	C40H38N4O17	-8	HYDROXYMETHYLBILANE	hmbil_c	HMDB01137	MNXM547	46931104	189449	InChI=1S/C40H46N4O17/c45-17-32-25(12-40(60)61)21(4-8-36(52)53)29(44-32)15-31-24(11-39(58)59)20(3-7-35(50)51)28(43-31)14-30-23(10-38(56)57)19(2-6-34(48)49)27(42-30)13-26-22(9-37(54)55)18(16-41-26)1-5-33(46)47/h16,41-45H,1-15,17H2,(H,46,47)(H,48,49)(H,50,51)(H,52,53)(H,54,55)(H,56,57)(H,58,59)(H,60,61)/p-8	WDFJYRZCZIUBPR-UHFFFAOYSA-F	CHEBI:57845	SBO:0000247
323	uppg3[c]	Uroporphyrinogen III	C01051	cpd00774	C40H36N4O16	-8	UROPORPHYRINOGEN-III	uppg3_c	HMDB01086	MNXM414	25202645	189407	InChI=1S/C40H44N4O16/c45-33(46)5-1-17-21(9-37(53)54)29-14-27-19(3-7-35(49)50)22(10-38(55)56)30(43-27)15-28-20(4-8-36(51)52)24(12-40(59)60)32(44-28)16-31-23(11-39(57)58)18(2-6-34(47)48)26(42-31)13-25(17)41-29/h41-44H,1-16H2,(H,45,46)(H,47,48)(H,49,50)(H,51,52)(H,53,54)(H,55,56)(H,57,58)(H,59,60)/p-8	HUHWZXWWOFSFKF-UHFFFAOYSA-F	CHEBI:57308	SBO:0000247
324	o2[e]	O2	C00007	cpd00007	O2	0	OXYGEN-MOLECULE	o2_e	HMDB01377	MNXM4	977	[]	InChI=1S/O2/c1-2	MYMOFIZGZYHOMD-UHFFFAOYSA-N	CHEBI:15379	SBO:0000247
325	2cpr5p[c]	1-(2-Carboxyphenylamino)-1-deoxy-D-ribulose 5-phosphate	C01302	cpd00956	C12H14NO9P	-2	CARBOXYPHENYLAMINO-DEOXYRIBULOSE-P	2cpr5p_c	[]	MNXM1455	45266701	[]	InChI=1S/C12H16NO9P/c14-9(11(16)10(15)6-22-23(19,20)21)5-13-8-4-2-1-3-7(8)12(17)18/h1-4,10-11,13,15-16H,5-6H2,(H,17,18)(H2,19,20,21)/p-3/t10-,11+/m1/s1	QKMBYNRMPRKVTO-MNOVXSKESA-K	CHEBI:58613	SBO:0000247
326	pro__L[c]	L-Proline	C00148	cpd00129	C5H8NO2	-1	PRO	pro__L_c	HMDB00162	MNXM114	6971047	[]	InChI=1S/C5H9NO2/c7-5(8)4-2-1-3-6-4/h4,6H,1-3H2,(H,7,8)/t4-/m0/s1	ONIBWKKTOPOVIA-BYPYZUCNSA-N	CHEBI:60039	SBO:0000247
327	pro__D[c]	D-Proline	C00763	cpd00567	C5H8NO2	-1	D-PROLINE	pro__D_c	HMDB03411	MNXM976	6971012	[]	InChI=1S/C5H9NO2/c7-5(8)4-2-1-3-6-4/h4,6H,1-3H2,(H,7,8)/t4-/m1/s1	ONIBWKKTOPOVIA-SCSAIBSYSA-N	CHEBI:57726	SBO:0000247
328	dcaACP[c]	Decanoyl-ACP (n-C10:0ACP)	C05755	cpd11474	C21H38N2O7PSR	-1	Decanoyl-ACPs	dcaACP_c	[]	MNXM1473	[]	[]	[]	[]	CHEBI:4349	SBO:0000247
329	glu__D[c]	D-Glutamate	C00217	cpd00186	C5H8NO4	-1	D-GLT	glu__D_c	HMDB03339	MNXM331	5460297	[]	InChI=1S/C5H9NO4/c6-3(5(9)10)1-2-4(7)8/h3H,1-2,6H2,(H,7,8)(H,9,10)/p-1/t3-/m1/s1	WHUUTDBJXJRKMK-GSVOUGTGSA-M	CHEBI:29986	SBO:0000247
330	dd2coa[c]	trans-Dodec-2-enoyl-CoA	C03221	cpd02060	C33H53N7O17P3S	-3	CPD-7222	dd2coa_c	HMDB03712	MNXM642	25245396	77255	InChI=1S/C33H56N7O17P3S/c1-4-5-6-7-8-9-10-11-12-13-24(42)61-17-16-35-23(41)14-15-36-31(45)28(44)33(2,3)19-54-60(51,52)57-59(49,50)53-18-22-27(56-58(46,47)48)26(43)32(55-22)40-21-39-25-29(34)37-20-38-30(25)40/h12-13,20-22,26-28,32,43-44H,4-11,14-19H2,1-3H3,(H,35,41)(H,36,45)(H,49,50)(H,51,52)(H2,34,37,38)(H2,46,47,48)/p-4/b13-12+/t22-,26-,27-,28+,32-/m1/s1	IRFYVBULXZMEDE-DEEZISNZSA-J	CHEBI:57330	SBO:0000247
331	cbp[c]	Carbamoyl phosphate	C00169	cpd00146	CH3NO5P	-1	CARBAMOYL-P	cbp_c	HMDB01096	MNXM138	3423467	[]	InChI=1S/CH4NO5P/c2-1(3)7-8(4,5)6/h(H2,2,3)(H2,4,5,6)/p-2	FFQKYPRQEYGKAF-UHFFFAOYSA-L	CHEBI:58228	SBO:0000247
332	ala_B[c]	beta-Alanine	C00099	cpd00085	C3H7NO2	0	B-ALANINE	ala_B_c	HMDB00056	MNXM144	4755801	[]	InChI=1S/C3H7NO2/c4-2-1-3(5)6/h1-2,4H2,(H,5,6)	UCMIRNVEIXFBKS-UHFFFAOYSA-N	CHEBI:57966	SBO:0000247
333	pnto__R[c]	(R)-Pantothenate	C00864	cpd00644	C9H16NO5	-1	PANTOTHENATE	pnto__R_c	HMDB00210	MNXM364	167945	[]	InChI=1S/C9H17NO5/c1-9(2,5-11)7(14)8(15)10-4-3-6(12)13/h7,11,14H,3-5H2,1-2H3,(H,10,15)(H,12,13)/p-1/t7-/m0/s1	GHOKWGTUZJEAQD-ZETCQYMHSA-M	CHEBI:29032	SBO:0000247
334	co2[e]	CO2	C00011	cpd00011	CO2	0	CARBON-DIOXIDE	co2_e	HMDB01967	MNXM13	280	[]	InChI=1S/CO2/c2-1-3	CURLTUGMZLYLDI-UHFFFAOYSA-N	CHEBI:16526	SBO:0000247
335	agm[c]	Agmatine	C00179	cpd00152	C5H16N4	2	AGMATHINE	agm_c	HMDB01432	MNXM328	5257176	351164	InChI=1S/C5H14N4/c6-3-1-2-4-9-5(7)8/h1-4,6H2,(H4,7,8,9)/p+2	QYPPJABKJHAVHS-UHFFFAOYSA-P	CHEBI:58145	SBO:0000247
336	urea[c]	Urea	C00086	cpd00073	CH4N2O	0	UREA	urea_c	HMDB00294	MNXM117	1176	[]	InChI=1S/CH4N2O/c2-1(3)4/h(H4,2,3,4)	XSQUKJJJFZCRTK-UHFFFAOYSA-N	CHEBI:16199	SBO:0000247
337	fdp[c]	D-Fructose 1,6-bisphosphate	C00354	cpd00290	C6H12O12P2	-2	FRUCTOSE-16-DIPHOSPHATE	fdp_c	HMDB01058	MNXM90006	5460765	[]	InChI=1S/C6H14O12P2/c7-4-3(1-16-19(10,11)12)18-6(9,5(4)8)2-17-20(13,14)15/h3-5,7-9H,1-2H2,(H2,10,11,12)(H2,13,14,15)/p-4/t3-,4-,5+,6-/m1/s1	RNBGYGVWRKECFJ-ARQDHWQXSA-J	CHEBI:32966	SBO:0000247
338	fgam[c]	N2-Formyl-N1-(5-phospho-D-ribosyl)glycinamide	C04376	cpd02678	C8H14N2O9P	-1	5-P-RIBOSYL-N-FORMYLGLYCINEAMIDE	fgam_c	HMDB01308	MNXM453	90658924	111354	InChI=1S/C8H15N2O9P/c11-3-9-1-5(12)10-8-7(14)6(13)4(19-8)2-18-20(15,16)17/h3-4,6-8,13-14H,1-2H2,(H,9,11)(H,10,12)(H2,15,16,17)/p-2/t4-,6-,7-,8-/m1/s1	VDXLUNDMVKSKHO-XVFCMESISA-L	CHEBI:147286	SBO:0000247
339	3php[c]	3-Phosphohydroxypyruvate	C03232	cpd02069	C3H3O7P	-2	3-P-HYDROXYPYRUVATE	3php_c	HMDB01024	MNXM541	5460375	977329	InChI=1S/C3H5O7P/c4-2(3(5)6)1-10-11(7,8)9/h1H2,(H,5,6)(H2,7,8,9)/p-3	LFLUCDOSQPJJBE-UHFFFAOYSA-K	CHEBI:18110	SBO:0000247
340	fpram[c]	2-(Formamido)-N1-(5-phospho-D-ribosyl)acetamidine	C04640	cpd02826	C8H16N3O8P	0	5-PHOSPHORIBOSYL-N-FORMYLGLYCINEAMIDINE	fpram_c	HMDB06211	MNXM568	90657386	[]	InChI=1S/C8H16N3O8P/c9-5(1-10-3-12)11-8-7(14)6(13)4(19-8)2-18-20(15,16)17/h3-4,6-8,13-14H,1-2H2,(H2,9,11)(H,10,12)(H2,15,16,17)/p-1/t4-,6-,7-,8-/m1/s1	PMCOGCVKOAOZQM-XVFCMESISA-M	CHEBI:147287	SBO:0000247
341	air[c]	5-amino-1-(5-phospho-D-ribosyl)imidazole	C03373	cpd02140	C8H14N3O7P	0	5-PHOSPHORIBOSYL-5-AMINOIMIDAZOLE	air_c	HMDB01235	MNXM388	44229244	111370	InChI=1S/C8H14N3O7P/c9-5-1-10-3-11(5)8-7(13)6(12)4(18-8)2-17-19(14,15)16/h1,3-4,6-8,12-13H,2,9H2,(H2,14,15,16)/p-1/t4-,6-,7-,8-/m1/s1	PDACUKOKVHBVHJ-XVFCMESISA-M	CHEBI:137981	SBO:0000247
342	ala__D[c]	D-Alanine	C00133	cpd00117	C3H7NO2	0	D-ALANINE	ala__D_c	HMDB01310	MNXM156	7311725	[]	InChI=1S/C3H7NO2/c1-2(4)3(5)6/h2H,4H2,1H3,(H,5,6)/t2-/m1/s1	QNAYBMKLOCPYGJ-UWTATZPHSA-N	CHEBI:57416	SBO:0000247
343	argsuc[c]	N(omega)-(L-Arginino)succinate	C03406	cpd02152	C10H17N4O6	-1	L-ARGININO-SUCCINATE	argsuc_c	HMDB00052	MNXM722743	46878376	34575	InChI=1S/C10H18N4O6/c11-5(8(17)18)2-1-3-13-10(12)14-6(9(19)20)4-7(15)16/h5-6H,1-4,11H2,(H,15,16)(H,17,18)(H,19,20)(H3,12,13,14)/p-1/t5-,6?/m0/s1	KDZOASGQNOPSCU-ZBHICJROSA-M	CHEBI:57472	SBO:0000247
344	din[c]	Deoxyinosine	C05512	cpd03279	C10H12N4O4	0	DEOXYINOSINE	din_c	HMDB00071	MNXM935	65058	[]	InChI=1S/C10H12N4O4/c15-2-6-5(16)1-7(18-6)14-4-13-8-9(14)11-3-12-10(8)17/h3-7,15-16H,1-2H2,(H,11,12,17)/t5-,6+,7+/m0/s1	VGONTNSXDCQUGY-RRKCRQDMSA-N	CHEBI:28997	SBO:0000247
345	3odcoa[c]	3-Oxodecanoyl-CoA	C05265	cpd03119	C31H49N7O18P3S	-3	CPD0-2123	3odcoa_c	HMDB03939	MNXM677	53262297	77339	InChI=1S/C31H52N7O18P3S/c1-4-5-6-7-8-9-19(39)14-22(41)60-13-12-33-21(40)10-11-34-29(44)26(43)31(2,3)16-53-59(50,51)56-58(48,49)52-15-20-25(55-57(45,46)47)24(42)30(54-20)38-18-37-23-27(32)35-17-36-28(23)38/h17-18,20,24-26,30,42-43H,4-16H2,1-3H3,(H,33,40)(H,34,44)(H,48,49)(H,50,51)(H2,32,35,36)(H2,45,46,47)/p-4/t20-,24-,25-,26+,30-/m1/s1	AZCVXMAPLHSIKY-HSJNEKGZSA-J	CHEBI:62548	SBO:0000247
346	dcamp[c]	N6-(1,2-Dicarboxyethyl)-AMP	C03794	cpd02375	C14H15N5O11P	-3	ADENYLOSUCC	dcamp_c	HMDB00536	MNXM565	46878398	35141	InChI=1S/C14H18N5O11P/c20-7(21)1-5(14(24)25)18-11-8-12(16-3-15-11)19(4-17-8)13-10(23)9(22)6(30-13)2-29-31(26,27)28/h3-6,9-10,13,22-23H,1-2H2,(H,20,21)(H,24,25)(H,15,16,18)(H2,26,27,28)/p-4/t5-,6+,9+,10+,13+/m0/s1	OFBHPPMPBOJXRT-VWJPMABRSA-J	CHEBI:57567	SBO:0000247
347	acser[c]	O-Acetyl-L-serine	C00979	cpd00722	C5H9NO4	0	ACETYLSERINE	acser_c	HMDB03011	[]	6971051	[]	InChI=1S/C5H9NO4/c1-3(7)10-2-4(6)5(8)9/h4H,2,6H2,1H3,(H,8,9)/t4-/m0/s1	VZXPDPZARILFQX-BYPYZUCNSA-N	CHEBI:58340	SBO:0000247
348	td2coa[c]	trans-Tetradec-2-enoyl-CoA	C05273	cpd03127	C35H57N7O17P3S	-3	CPD-15568	td2coa_c	HMDB03946	MNXM654	46173185	77273	InChI=1S/C35H60N7O17P3S/c1-4-5-6-7-8-9-10-11-12-13-14-15-26(44)63-19-18-37-25(43)16-17-38-33(47)30(46)35(2,3)21-56-62(53,54)59-61(51,52)55-20-24-29(58-60(48,49)50)28(45)34(57-24)42-23-41-27-31(36)39-22-40-32(27)42/h14-15,22-24,28-30,34,45-46H,4-13,16-21H2,1-3H3,(H,37,43)(H,38,47)(H,51,52)(H,53,54)(H2,36,39,40)(H2,48,49,50)/p-4/b15-14+/t24-,28-,29-,30+,34-/m1/s1	MBCVYCOKMMMWLX-YYMFEJJQSA-J	CHEBI:61405	SBO:0000247
349	adocbl[c]	Adenosylcobalamin	C00194	cpd00166	C72H101N18O17PCo	1	ADENOSYLCOBALAMIN	adocbl_c	HMDB02086	MNXM90703	91820207	3159297	InChI=1S/C62H90N13O14P.C10H12N5O3.Co/c1-29-20-39-40(21-30(29)2)75(28-70-39)57-52(84)53(41(27-76)87-57)89-90(85,86)88-31(3)26-69-49(83)18-19-59(8)37(22-46(66)80)56-62(11)61(10,25-48(68)82)36(14-17-45(65)79)51(74-62)33(5)55-60(9,24-47(67)81)34(12-15-43(63)77)38(71-55)23-42-58(6,7)35(13-16-44(64)78)50(72-42)32(4)54(59)73-56;1-4-6(16)7(17)10(18-4)15-3-14-5-8(11)12-2-13-9(5)15;/h20-21,23,28,31,34-37,4…	ZIHHMGTYZOSFRC-DOBZORSKSA-L	CHEBI:18408	SBO:0000247
350	4abutn[c]	4-Aminobutanal	C00555	cpd00434	C4H10NO	1	4-AMINO-BUTYRALDEHYDE	4abutn_c	HMDB01080	MNXM422	25245200	[]	InChI=1S/C4H9NO/c5-3-1-2-4-6/h4H,1-3,5H2/p+1	DZQLQEYLEYWJIB-UHFFFAOYSA-O	CHEBI:58264	SBO:0000247
351	mg2[e]	Mg2	C00305	cpd00254	Mg	2	MG+2	mg2_e	HMDB00547	MNXM653	888	[]	InChI=1S/Mg/q+2	JLVVSXFLKOJNIY-UHFFFAOYSA-N	CHEBI:18420	SBO:0000247
352	mg2[c]	mg2	C00305	cpd00254	Mg	2	MG+2	mg2_c	HMDB00547	MNXM653	888	[]	InChI=1S/Mg/q+2	JLVVSXFLKOJNIY-UHFFFAOYSA-N	CHEBI:18420	SBO:0000247
353	thymd[c]	Thymidine	C00214	cpd00184	C10H14N2O5	0	THYMIDINE	thymd_c	HMDB00273	MNXM420	5789	83928	InChI=1S/C10H14N2O5/c1-5-3-12(10(16)11-9(5)15)8-2-6(14)7(4-13)17-8/h3,6-8,13-14H,2,4H2,1H3,(H,11,15,16)/t6-,7+,8+/m0/s1	IQFYYKKMVGJFEH-XLPZGREQSA-N	CHEBI:17748	SBO:0000247
354	phthr[c]	O-Phospho-4-hydroxy-L-threonine	C06055	cpd03607	C4H9NO7P	-1	4-PHOSPHONOOXY-THREONINE	phthr_c	HMDB06802	MNXM759	45480653	[]	InChI=1S/C4H10NO7P/c5-3(4(7)8)2(6)1-12-13(9,10)11/h2-3,6H,1,5H2,(H,7,8)(H2,9,10,11)/p-2/t2-,3+/m1/s1	FKHAKIJOKDGEII-GBXIJSLDSA-L	CHEBI:58452	SBO:0000247
355	4hthr[c]	4-Hydroxy-L-threonine	C06056	cpd03608	C4H9NO4	0	CPD0-2189	4hthr_c	[]	MNXM1802	49852420	[]	InChI=1S/C4H9NO4/c5-3(4(8)9)2(7)1-6/h2-3,6-7H,1,5H2,(H,8,9)/t2-,3+/m1/s1	JBNUARFQOCGDRK-GBXIJSLDSA-N	CHEBI:60904	SBO:0000247
356	prbamp[c]	1-(5-Phosphoribosyl)-AMP	C02741	cpd01777	C15H21N5O14P2	-2	PHOSPHORIBOSYL-AMP	prbamp_c	HMDB12276	MNXM1515	45480652	[]	InChI=1S/C15H23N5O14P2/c16-12-7-13(18-4-19(12)14-10(23)8(21)5(33-14)1-31-35(25,26)27)20(3-17-7)15-11(24)9(22)6(34-15)2-32-36(28,29)30/h3-6,8-11,14-16,21-24H,1-2H2,(H2,25,26,27)(H2,28,29,30)/p-4/t5-,6-,8-,9-,10-,11-,14-,15-/m1/s1	RTQMRTSPTLIIHM-KEOHHSTQSA-J	CHEBI:59457	SBO:0000247
357	3ohdcoa[c]	3-Oxohexadecanoyl-CoA	C05259	cpd03114	C37H61N7O18P3S	-3	3-OXOPALMITOYL-COA	3ohdcoa_c	HMDB06402	MNXM738	25244191	77302	InChI=1S/C37H64N7O18P3S/c1-4-5-6-7-8-9-10-11-12-13-14-15-25(45)20-28(47)66-19-18-39-27(46)16-17-40-35(50)32(49)37(2,3)22-59-65(56,57)62-64(54,55)58-21-26-31(61-63(51,52)53)30(48)36(60-26)44-24-43-29-33(38)41-23-42-34(29)44/h23-24,26,30-32,36,48-49H,4-22H2,1-3H3,(H,39,46)(H,40,50)(H,54,55)(H,56,57)(H2,38,41,42)(H2,51,52,53)/p-4/t26-,30-,31-,32+,36-/m1/s1	NQMPLXPCRJOSHL-BBECNAHFSA-J	CHEBI:57349	SBO:0000247
358	xtsn[c]	Xanthosine	C01762	cpd01217	C10H12N4O6	0	XANTHOSINE	xtsn_c	HMDB00299	MNXM687	64959	[]	InChI=1S/C10H12N4O6/c15-1-3-5(16)6(17)9(20-3)14-2-11-4-7(14)12-10(19)13-8(4)18/h2-3,5-6,9,15-17H,1H2,(H2,12,13,18,19)/t3-,5-,6-,9-/m1/s1	UBORTCNDUKBEOP-UUOKFMHZSA-N	CHEBI:18107	SBO:0000247
359	2ippm[c]	2-Isopropylmaleate	C02631	cpd01710	C7H8O4	-2	CPD-9451	2ippm_c	HMDB12241	MNXM1706	21954611	[]	InChI=1S/C7H10O4/c1-4(2)5(7(10)11)3-6(8)9/h3-4H,1-2H3,(H,8,9)(H,10,11)/p-2/b5-3-	NJMGRJLQRLFQQX-HYXAFXHYSA-L	CHEBI:58085	SBO:0000247
360	3hhcoa[c]	(S)-3-Hydroxyhexanoyl-CoA	C05268	cpd03122	C27H43N7O18P3S	-3	OH-HEXANOYL-COA	3hhcoa_c	HMDB03942	MNXM757	49859661	77322	InChI=1S/C27H46N7O18P3S/c1-4-5-15(35)10-18(37)56-9-8-29-17(36)6-7-30-25(40)22(39)27(2,3)12-49-55(46,47)52-54(44,45)48-11-16-21(51-53(41,42)43)20(38)26(50-16)34-14-33-19-23(28)31-13-32-24(19)34/h13-16,20-22,26,35,38-39H,4-12H2,1-3H3,(H,29,36)(H,30,40)(H,44,45)(H,46,47)(H2,28,31,32)(H2,41,42,43)/p-4/t15-,16+,20+,21+,22-,26+/m0/s1	VAAHKRMGOFIORX-IKTBLOROSA-J	CHEBI:62075	SBO:0000247
361	4hba[c]	4-Hydroxy-benzyl alcohol	C17467	cpd17595	C7H8O2	0	4-HYDROXY-BENZYL-ALCOHOL	4hba_c	HMDB11724	MNXM107505	125	[]	InChI=1S/C7H8O2/c8-5-6-1-3-7(9)4-2-6/h1-4,8-9H,5H2	BVJSUAQZOZWCKN-UHFFFAOYSA-N	CHEBI:67410	SBO:0000247
362	h2o[e]	H2O	C00001	cpd00001	H2O	0	WATER	h2o_e	HMDB02111	[]	962	[]	InChI=1S/H2O/h1H2	XLYOFNOQVPJJNP-UHFFFAOYSA-N	CHEBI:15377	SBO:0000247
363	fixedNH3[c]	fixedNH3	C00014	cpd00013	H3N	0	AMMONIA	fixedNH3_c	HMDB00051	[]	222	[]	InChI=1S/H3N/h1H3	QGZKDVFQNNGYKY-UHFFFAOYSA-N	CHEBI:16134	SBO:0000247
364	h2[c]	H2	C00282	cpd11640	H2	0	HYDROGEN-MOLECULE	h2_c	HMDB01362	MNXM195	783	113555	InChI=1S/H2/h1H	UFHFLCQGNIYNRP-UHFFFAOYSA-N	CHEBI:18276	SBO:0000247
365	nicrns[c]	Nicotinate D-ribonucleoside	C05841	cpd03471	C11H13NO6	0	CPD-8259	nicrns_c	HMDB06809	MNXM1915	161233	8869365	InChI=1S/C11H13NO6/c13-5-7-8(14)9(15)10(18-7)12-3-1-2-6(4-12)11(16)17/h1-4,7-10,13-15H,5H2/t7-,8-,9-,10-/m1/s1	PUEDDPCUCPRQNY-ZYUZMQFOSA-N	CHEBI:58527	SBO:0000247
366	methf[c]	5,10-Methenyltetrahydrofolate	C00445	cpd00347	C20H20N7O6	-1	5-10-METHENYL-THF	methf_c	HMDB01354	MNXM511	46878371	6801458	InChI=1S/C20H21N7O6/c21-20-24-16-15(18(31)25-20)27-9-26(8-12(27)7-22-16)11-3-1-10(2-4-11)17(30)23-13(19(32)33)5-6-14(28)29/h1-4,9,12-13H,5-8H2,(H6-,21,22,23,24,25,28,29,30,31,32,33)/p-1/t12-,13+/m1/s1	MEANFMOQMXYMCT-OLZOCXBDSA-M	CHEBI:57455	SBO:0000247
367	prbatp[c]	1-(5-Phosphoribosyl)-ATP	C02739	cpd01775	C15H21N5O20P4	-4	PHOSPHORIBOSYL-ATP	prbatp_c	HMDB03665	MNXM1351	90658853	[]	InChI=1S/C15H25N5O20P4/c16-12-7-13(18-4-19(12)14-10(23)8(21)5(37-14)1-35-41(25,26)27)20(3-17-7)15-11(24)9(22)6(38-15)2-36-43(31,32)40-44(33,34)39-42(28,29)30/h3-6,8-11,14-16,21-24H,1-2H2,(H,31,32)(H,33,34)(H2,25,26,27)(H2,28,29,30)/p-6/t5-,6-,8-,9-,10-,11-,14-,15-/m1/s1	RKNHJBVBFHDXGR-KEOHHSTQSA-H	CHEBI:73183	SBO:0000247
368	cdpdag_cho[c]	CDPdiacylglycerol	C00269	cpd11427	C7H7N2O7PR	-2	CDPDIACYLGLYCEROL	cdpdag_cho_c	[]	MNXM201	[]	[]	[]	[]	CHEBI:17962	SBO:0000247
369	ps_cho[c]	Phosphatidylserine	C02737	cpd11455	CO2R	-2	L-1-PHOSPHATIDYL-SERINE	ps_cho_c	HMDB14291	MNXM221	[]	[]	[]	[]	CHEBI:11750	SBO:0000247
370	cmp[c]	CMP	C00055	cpd00046	C9H13N3O8P	-1	CMP	cmp_c	HMDB00095	MNXM31	7058165	[]	InChI=1S/C9H14N3O8P/c10-5-1-2-12(9(15)11-5)8-7(14)6(13)4(20-8)3-19-21(16,17)18/h1-2,4,6-8,13-14H,3H2,(H2,10,11,15)(H2,16,17,18)/p-2/t4-,6-,7-,8-/m1/s1	IERHLVCPSMICTF-XVFCMESISA-L	CHEBI:60377	SBO:0000247
371	oc2coa[c]	trans-Oct-2-enoyl-CoA	C05276	cpd03130	C29H45N7O17P3S	-3	CPD0-2108	oc2coa_c	HMDB03949	MNXM784	46173358	[]	InChI=1S/C29H48N7O17P3S/c1-4-5-6-7-8-9-20(38)57-13-12-31-19(37)10-11-32-27(41)24(40)29(2,3)15-50-56(47,48)53-55(45,46)49-14-18-23(52-54(42,43)44)22(39)28(51-18)36-17-35-21-25(30)33-16-34-26(21)36/h8-9,16-18,22-24,28,39-40H,4-7,10-15H2,1-3H3,(H,31,37)(H,32,41)(H,45,46)(H,47,48)(H2,30,33,34)(H2,42,43,44)/p-4/b9-8+/t18-,22-,23-,24+,28-/m1/s1	CPSDNAXXKWVYIY-NTLMCJQISA-J	CHEBI:62242	SBO:0000247
372	pe_hs[c]	Phosphatidylethanolamine	C00350	cpd11456	HR	-1	L-1-PHOSPHATIDYL-ETHANOLAMINE	pe_hs_c	[]	MNXM4022	[]	[]	[]	[]	CHEBI:16038	SBO:0000247
373	dcyt[c]	Deoxycytidine	C00881	cpd00654	C9H13N3O4	0	DEOXYCYTIDINE	dcyt_c	HMDB00014	MNXM704	13711	500829	InChI=1S/C9H13N3O4/c10-7-1-2-12(9(15)11-7)8-3-5(14)6(4-13)16-8/h1-2,5-6,8,13-14H,3-4H2,(H2,10,11,15)/t5-,6+,8+/m0/s1	CKTSBUTUHBMZGZ-SHYZEUOFSA-N	CHEBI:15698	SBO:0000247
374	cgly[c]	Cys-Gly	C01419	cpd01017	C5H10N2O3S	0	CYS-GLY	cgly_c	HMDB00078	MNXM683	7098621	[]	InChI=1S/C5H10N2O3S/c6-3(2-11)5(10)7-1-4(8)9/h3,11H,1-2,6H2,(H,7,10)(H,8,9)/t3-/m0/s1	ZUKPVRWZDMRIEO-VKHMYHEASA-N	CHEBI:61694	SBO:0000247
375	dgmp[c]	dGMP	C00362	cpd00296	C10H13N5O7P	-1	DGMP	dgmp_c	HMDB01044	MNXM546	6994968	500071	InChI=1S/C10H14N5O7P/c11-10-13-8-7(9(17)14-10)12-3-15(8)6-1-4(16)5(22-6)2-21-23(18,19)20/h3-6,16H,1-2H2,(H2,18,19,20)(H3,11,13,14,17)/p-2/t4-,5+,6+/m0/s1	LTFMZDNNPPEQNG-KVQBGUIXSA-L	CHEBI:57673	SBO:0000247
376	homocitrate[e]	Homocitrate	C01251	cpd00919	C7H7O7	-3	HOMO-CIT	[]	HMDB03518	MNXM722779	20849228	[]	InChI=1S/C7H10O7/c8-4(9)1-2-7(14,6(12)13)3-5(10)11/h14H,1-3H2,(H,8,9)(H,10,11)(H,12,13)/p-3/t7-/m1/s1	XKJVEVRQMLKSMO-SSDOTTSWSA-K	CHEBI:58884	SBO:0000247
377	homocitrate[c]	Homocitrate	C01251	cpd00919	C7H7O7	-3	HOMO-CIT	[]	HMDB03518	MNXM722779	20849228	[]	InChI=1S/C7H10O7/c8-4(9)1-2-7(14,6(12)13)3-5(10)11/h14H,1-3H2,(H,8,9)(H,10,11)(H,12,13)/p-3/t7-/m1/s1	XKJVEVRQMLKSMO-SSDOTTSWSA-K	CHEBI:58884	SBO:0000247
378	4ahmmp[c]	4-Amino-5-hydroxymethyl-2-methylpyrimidine	C01279	cpd00939	C6H9N3O	0	HMP	4ahmmp_c	[]	MNXM874	777	[]	InChI=1S/C6H9N3O/c1-4-8-2-5(3-10)6(7)9-4/h2,10H,3H2,1H3,(H2,7,8,9)	VUTBELPREDJDDH-UHFFFAOYSA-N	CHEBI:16892	SBO:0000247
379	mobd[e]	MoO4	C06232	cpd11574	H2O4Mo	0	CPD-3	mobd_e	HMDB12260	MNXM1026	24621	947561	InChI=1S/Mo.4O/q;;;2*-1	MEFBJEMVZONFCJ-UHFFFAOYSA-N	CHEBI:36264	SBO:0000247
380	mobd[c]	MoO4	C06232	cpd11574	H2O4Mo	0	CPD-3	mobd_c	HMDB12260	MNXM1026	24621	947561	InChI=1S/Mo.4O/q;;;2*-1	MEFBJEMVZONFCJ-UHFFFAOYSA-N	CHEBI:36264	SBO:0000247
381	fe2[e]	Fe2+	C14818	cpd10515	Fe	2	FE+2	fe2_e	HMDB00692	MNXM111	27284	[]	InChI=1S/Fe/q+2	CWYNVVGOOAEACU-UHFFFAOYSA-N	CHEBI:29033	SBO:0000247
382	pi[e]	orthophosphate	C00009	cpd00009	HO4P	-2	CPD-20124	pi_e	[]	[]	1004	[]	InChI=1S/H3O4P/c1-5(2,3)4/h(H3,1,2,3,4)	NBIIXXVUZAFLBC-UHFFFAOYSA-N	CHEBI:26078	SBO:0000247
383	datp[c]	dATP	C00131	cpd00115	C10H13N5O12P3	-3	DATP	datp_c	HMDB01532	MNXM286	25320183	110644	InChI=1S/C10H16N5O12P3/c11-9-8-10(13-3-12-9)15(4-14-8)7-1-5(16)6(25-7)2-24-29(20,21)27-30(22,23)26-28(17,18)19/h3-7,16H,1-2H2,(H,20,21)(H,22,23)(H2,11,12,13)(H2,17,18,19)/p-4/t5-,6+,7+/m0/s1	SUYVUBYJARFZHO-RRKCRQDMSA-J	CHEBI:61404	SBO:0000247
384	damp[c]	dAMP	C00360	cpd00294	C10H13N5O6P	-1	DAMP	damp_c	HMDB00905	MNXM432	22848660	[]	InChI=1S/C10H14N5O6P/c11-9-8-10(13-3-12-9)15(4-14-8)7-1-5(16)6(21-7)2-20-22(17,18)19/h3-7,16H,1-2H2,(H2,11,12,13)(H2,17,18,19)/p-2/t5-,6+,7+/m0/s1	KHWCHTKSEGGWEX-RRKCRQDMSA-L	CHEBI:58245	SBO:0000247
385	dadp[c]	dADP	C00206	cpd00177	C10H13N5O9P2	-2	DADP	dadp_c	HMDB01508	MNXM374	21125569	500087	InChI=1S/C10H15N5O9P2/c11-9-8-10(13-3-12-9)15(4-14-8)7-1-5(16)6(23-7)2-22-26(20,21)24-25(17,18)19/h3-7,16H,1-2H2,(H,20,21)(H2,11,12,13)(H2,17,18,19)/p-3/t5-,6+,7+/m0/s1	DAEAPNUQQAICNR-RRKCRQDMSA-K	CHEBI:57667	SBO:0000247
386	pppg9[c]	Protoporphyrinogen IX	C01079	cpd00791	C34H38N4O4	-2	PROTOPORPHYRINOGEN	pppg9_c	HMDB01097	MNXM351	20849104	189478	InChI=1S/C34H40N4O4/c1-7-21-17(3)25-13-26-19(5)23(9-11-33(39)40)31(37-26)16-32-24(10-12-34(41)42)20(6)28(38-32)15-30-22(8-2)18(4)27(36-30)14-29(21)35-25/h7-8,35-38H,1-2,9-16H2,3-6H3,(H,39,40)(H,41,42)/p-2	UHSGPDMIQQYNAX-UHFFFAOYSA-L	CHEBI:57307	SBO:0000247
387	gthrd[c]	Reduced glutathione	C00051	cpd00042	C10H16N3O6S	-1	GLUTATHIONE	gthrd_c	HMDB00125	MNXM57	7048684	[]	InChI=1S/C10H17N3O6S/c11-5(10(18)19)1-2-7(14)13-6(4-20)9(17)12-3-8(15)16/h5-6,20H,1-4,11H2,(H,12,17)(H,13,14)(H,15,16)(H,18,19)/p-1/t5-,6-/m0/s1	RWSXRVCMGQZWBV-WDSKDSINSA-M	CHEBI:57925	SBO:0000247
388	gluala[c]	5-L-Glutamyl-L-alanine	[]	cpd15236	C8H13N2O5	-1	CPD-22081	gluala_c	[]	[]	7009568	[]	InChI=1S/C8H14N2O5/c1-4(7(12)13)10-6(11)3-2-5(9)8(14)15/h4-5H,2-3,9H2,1H3,(H,10,11)(H,12,13)(H,14,15)/p-1/t4-,5-/m0/s1	WQXXXVRAFAKQJM-WHFBIAKZSA-M	CHEBI:133091	SBO:0000247
389	hemeO[c]	HemeO	C15672	cpd11313	C49H56N4O5Fe	-2	HEME_O	hemeO_c	HMDB01162	[]	49792067	[]	InChI=1S/C49H60N4O5.Fe/c1-10-35-31(6)40-26-45-49(46(54)19-13-18-30(5)17-12-16-29(4)15-11-14-28(2)3)34(9)41(53-45)24-38-32(7)36(20-22-47(55)56)43(51-38)27-44-37(21-23-48(57)58)33(8)39(52-44)25-42(35)50-40;/h10,14,16,18,24-27,46,54H,1,11-13,15,17,19-23H2,2-9H3,(H4,50,51,52,53,55,56,57,58);/q;+4/p-4/b29-16+,30-18+,38-24-,39-25-,40-26-,41-24-,42-25-,43-27-,44-27-,45-26-;/t46-;/m0./s1	FRKORVCRVCLRBA-ARQJTVBPSA-J	CHEBI:24480	SBO:0000247
390	3hbutACP[c]	(R)-3-Hydroxybutanoyl-[acyl-carrier protein]	C04618	cpd11478	C15H26N2O8PSR	-1	Beta-3-hydroxybutyryl-ACPs	3hbutACP_c	[]	MNXM91793	[]	[]	[]	[]	[]	SBO:0000247
391	thm[e]	Thiamine	C00378	cpd00305	C12H17N4OS	1	THIAMINE	thm_e	HMDB00235	MNXM322	1130	[]	InChI=1S/C12H17N4OS/c1-8-11(3-4-17)18-7-16(8)6-10-5-14-9(2)15-12(10)13/h5,7,17H,3-4,6H2,1-2H3,(H2,13,14,15)/q+1	JZRWCGZRTZMZEH-UHFFFAOYSA-N	CHEBI:18385	SBO:0000247
392	thm[c]	Thiamine	C00378	cpd00305	C12H17N4OS	1	THIAMINE	thm_c	HMDB00235	MNXM322	1130	[]	InChI=1S/C12H17N4OS/c1-8-11(3-4-17)18-7-16(8)6-10-5-14-9(2)15-12(10)13/h5,7,17H,3-4,6H2,1-2H3,(H2,13,14,15)/q+1	JZRWCGZRTZMZEH-UHFFFAOYSA-N	CHEBI:18385	SBO:0000247
393	palmACP[c]	hexdecACP	C05764	cpd11476	C27H50N2O7PSR	-1	Palmitoyl-ACPs	palmACP_c	[]	MNXM844	[]	[]	[]	[]	CHEBI:5697	SBO:0000247
394	alaala[c]	D-Alanyl-D-alanine	C00993	cpd00731	C6H12N2O3	0	D-ALA-D-ALA	alaala_c	HMDB03459	MNXM669	6992112	[]	InChI=1S/C6H12N2O3/c1-3(7)5(9)8-4(2)6(10)11/h3-4H,7H2,1-2H3,(H,8,9)(H,10,11)/t3-,4-/m1/s1	DEFJQIDDEAULHB-QWWZWVQMSA-N	CHEBI:57822	SBO:0000247
395	ugmd[c]	UDP-N-acetylmuramoyl-L-alanyl-D-gamma-glutamyl-meso-2,6-diaminopimelate	C04877	cpd02964	C35H51N7O26P2	-4	UDP-AAGM-DIAMINOHEPTANEDIOATE	ugmd_c	[]	MNXM1446	25243985	[]	InChI=1S/C35H55N7O26P2/c1-13(28(50)40-18(33(56)57)7-8-21(45)39-17(32(54)55)6-4-5-16(36)31(52)53)37-29(51)14(2)64-27-23(38-15(3)44)34(66-19(11-43)25(27)48)67-70(61,62)68-69(59,60)63-12-20-24(47)26(49)30(65-20)42-10-9-22(46)41-35(42)58/h9-10,13-14,16-20,23-27,30,34,43,47-49H,4-8,11-12,36H2,1-3H3,(H,37,51)(H,38,44)(H,39,45)(H,40,50)(H,52,53)(H,54,55)(H,56,57)(H,59,60)(H,61,62)(H,41,46,58)/p-4/t13-,1…	QUHLBZKCGUXHGP-BHBBPGSKSA-J	CHEBI:83905	SBO:0000247
396	ugmda[c]	UDP-N-acetylmuramoyl-L-alanyl-D-glutamyl-meso-2,6-diaminopimeloyl-D-alanyl-D-alanine	C04882	cpd02968	C41H61N9O28P2	-4	C1	ugmda_c	[]	MNXM1954	25244658	[]	InChI=1S/C41H65N9O28P2/c1-15(32(58)45-17(3)37(62)63)44-35(61)21(8-6-7-20(42)38(64)65)47-25(53)10-9-22(39(66)67)48-33(59)16(2)43-34(60)18(4)74-31-27(46-19(5)52)40(76-23(13-51)29(31)56)77-80(71,72)78-79(69,70)73-14-24-28(55)30(57)36(75-24)50-12-11-26(54)49-41(50)68/h11-12,15-18,20-24,27-31,36,40,51,55-57H,6-10,13-14,42H2,1-5H3,(H,43,60)(H,44,61)(H,45,58)(H,46,52)(H,47,53)(H,48,59)(H,62,63)(H,64,65)…	IMWOXEZVYQDRDF-MCZXNMLPSA-J	CHEBI:61386	SBO:0000247
397	trnalys[c]	tRNA(Lys)	C01646	cpd11917	R	0	LYS-tRNAs	trnalys_c	[]	MNXM90881	[]	[]	[]	[]	CHEBI:29185	SBO:0000247
398	lystrna[c]	L-Lysine-tRNA (Lys)	[]	cpd15249	C6H14N2OR	2	[]	lystrna_c	[]	[]	[]	[]	[]	[]	[]	SBO:0000247
399	so4[e]	Sulfate	C00059	cpd00048	O4S	-2	SULFATE	so4_e	HMDB01448	[]	1117	[]	InChI=1S/H2O4S/c1-5(2,3)4/h(H2,1,2,3,4)/p-2	QAOWNCQODCNURD-UHFFFAOYSA-L	CHEBI:16189	SBO:0000247
400	so4[c]	Sulfate	C00059	cpd00048	O4S	-2	SULFATE	so4_c	HMDB01448	[]	1117	[]	InChI=1S/H2O4S/c1-5(2,3)4/h(H2,1,2,3,4)/p-2	QAOWNCQODCNURD-UHFFFAOYSA-L	CHEBI:16189	SBO:0000247
401	progly[c]	L-Prolinylglycine	[]	cpd15551	C7H11N2O3	-1	CPD0-2182	progly_c	[]	MNXM7481	45479568	[]	InChI=1S/C7H14N2O3/c10-7(11)4-9-12-5-6-2-1-3-8-6/h6,8-9H,1-5H2,(H,10,11)/t6-/m0/s1	XASIIFOIMAXKBF-LURJTMIESA-N	CHEBI:61695	SBO:0000247
402	ala__L[e]	L-Alanine	C00041	cpd00035	C3H7NO2	0	L-ALPHA-ALANINE	ala__L_e	HMDB00161	[]	7311724	[]	InChI=1S/C3H7NO2/c1-2(4)3(5)6/h2H,4H2,1H3,(H,5,6)/t2-/m0/s1	QNAYBMKLOCPYGJ-REOHCLBHSA-N	CHEBI:57972	SBO:0000247
403	asp__L[e]	L-Aspartate	C00049	cpd00041	C4H6NO4	-1	L-ASPARTATE	asp__L_e	HMDB00191	MNXM42	5460294	[]	InChI=1S/C4H7NO4/c5-2(4(8)9)1-3(6)7/h2H,1,5H2,(H,6,7)(H,8,9)/p-1/t2-/m0/s1	CKLJMWTZIZZHCS-REOHCLBHSA-M	CHEBI:29991	SBO:0000247
404	trnatrp[c]	tRNA(Trp)	C01652	cpd11923	R	0	TRP-tRNAs	trnatrp_c	[]	MNXM90755	[]	[]	[]	[]	CHEBI:29181	SBO:0000247
405	trptrna[c]	L-Tryptophanyl-tRNA(Trp)	C03512	cpd12336	C11H11N2OR	1	Charged-TRP-tRNAs	trptrna_c	[]	MNXM167418	[]	[]	[]	[]	CHEBI:29159	SBO:0000247
406	sl26da[c]	N-Succinyl-LL-2,6-diaminoheptanedioate	C04421	cpd02698	C11H16N2O7	-2	N-SUCCINYLLL-2-6-DIAMINOPIMELATE	sl26da_c	HMDB12267	MNXM1488	11948934	[]	InChI=1S/C11H18N2O7/c12-6(10(17)18)2-1-3-7(11(19)20)13-8(14)4-5-9(15)16/h6-7H,1-5,12H2,(H,13,14)(H,15,16)(H,17,18)(H,19,20)/p-2/t6-,7-/m0/s1	GLXUWZBUPATPBR-BQBZGAKWSA-L	CHEBI:58087	SBO:0000247
407	agdpcbi[c]	Adenosine-GDP-cobinamide	C06510	cpd03920	C68H96N21O21P2Co	0	ADENOSYLCOBINAMIDE-GDP	agdpcbi_c	HMDB12185	MNXM1105	70678596	[]	InChI=1S/C58H86N16O18P2.C10H12N5O3.Co/c1-25(91-94(87,88)92-93(85,86)89-23-33-45(82)46(83)52(90-33)74-24-67-44-50(74)71-53(65)72-51(44)84)22-66-41(81)16-17-55(6)31(18-38(62)78)49-58(9)57(8,21-40(64)80)30(12-15-37(61)77)43(73-58)27(3)48-56(7,20-39(63)79)28(10-13-35(59)75)32(68-48)19-34-54(4,5)29(11-14-36(60)76)42(69-34)26(2)47(55)70-49;1-4-6(16)7(17)10(18-4)15-3-14-5-8(11)12-2-13-9(5)15;/h19,24-25,…	IQTYKHRKNGVJEO-RRMAJTJESA-K	CHEBI:60487	SBO:0000247
408	athr__L[c]	L-Allo-threonine	C05519	cpd03282	C4H9NO3	0	L-ALLO-THREONINE	athr__L_c	HMDB04041	MNXM2125	6995276	[]	InChI=1S/C4H9NO3/c1-2(6)3(5)4(7)8/h2-3,6H,5H2,1H3,(H,7,8)/t2-,3-/m0/s1	AYFVYJQAPQTCCC-HRFVKAFMSA-N	CHEBI:58585	SBO:0000247
409	dccoa[c]	Decanoyl-CoA(n-C10:0CoA)	C05274	cpd03128	C31H51N7O17P3S	-3	CPD-10267	dccoa_c	HMDB06404	MNXM486	25244140	77308	InChI=1S/C31H54N7O17P3S/c1-4-5-6-7-8-9-10-11-22(40)59-15-14-33-21(39)12-13-34-29(43)26(42)31(2,3)17-52-58(49,50)55-57(47,48)51-16-20-25(54-56(44,45)46)24(41)30(53-20)38-19-37-23-27(32)35-18-36-28(23)38/h18-20,24-26,30,41-42H,4-17H2,1-3H3,(H,33,39)(H,34,43)(H,47,48)(H,49,50)(H2,32,35,36)(H2,44,45,46)/p-4/t20-,24-,25-,26+,30-/m1/s1	CNKJPHSEFDPYDB-HSJNEKGZSA-J	CHEBI:61430	SBO:0000247
410	4c2me[c]	4-(cytidine 5-diphospho)-2-C-methyl-D-erythritol	C11435	cpd08287	C14H23N3O14P2	-2	4-CYTIDINE-5-DIPHOSPHO-2-C	4c2me_c	[]	MNXM1642	24970669	[]	InChI=1S/C14H25N3O14P2/c1-14(23,6-18)8(19)5-29-33(26,27)31-32(24,25)28-4-7-10(20)11(21)12(30-7)17-3-2-9(15)16-13(17)22/h2-3,7-8,10-12,18-21,23H,4-6H2,1H3,(H,24,25)(H,26,27)(H2,15,16,22)/p-2/t7-,8-,10-,11-,12-,14+/m1/s1	YFAUKWZNPVBCFF-XHIBXCGHSA-L	CHEBI:57823	SBO:0000247
411	2p4c2me[c]	2-phospho-4-(cytidine 5-diphospho)-2-C-methyl-D-erythritol	C11436	cpd08288	C14H23N3O17P3	-3	2-PHOSPHO-4-CYTIDINE-5-DIPHOSPHO-2-C-MET	2p4c2me_c	[]	MNXM1641	46878430	[]	InChI=1S/C14H26N3O17P3/c1-14(6-18,33-35(23,24)25)8(19)5-31-37(28,29)34-36(26,27)30-4-7-10(20)11(21)12(32-7)17-3-2-9(15)16-13(17)22/h2-3,7-8,10-12,18-21H,4-6H2,1H3,(H,26,27)(H,28,29)(H2,15,16,22)(H2,23,24,25)/p-4/t7-,8-,10-,11-,12-,14+/m1/s1	HTJXTKBIUVFUAR-XHIBXCGHSA-J	CHEBI:57919	SBO:0000247
412	cpppg3[c]	Coproporphyrinogen III	C03263	cpd02083	C36H40N4O8	-4	COPROPORPHYRINOGEN_III	cpppg3_c	HMDB01261	MNXM410	20849114	[]	InChI=1S/C36H44N4O8/c1-17-21(5-9-33(41)42)29-14-27-19(3)22(6-10-34(43)44)30(39-27)15-28-20(4)24(8-12-36(47)48)32(40-28)16-31-23(7-11-35(45)46)18(2)26(38-31)13-25(17)37-29/h37-40H,5-16H2,1-4H3,(H,41,42)(H,43,44)(H,45,46)(H,47,48)/p-4	NIUVHXTXUXOFEB-UHFFFAOYSA-J	CHEBI:57309	SBO:0000247
413	23dhdp[c]	2,3-Dihydrodipicolinate	C03340	cpd02120	C7H5NO4	-2	2-3-DIHYDRODIPICOLINATE	23dhdp_c	HMDB12247	MNXM807	5460228	[]	InChI=1S/C7H7NO4/c9-6(10)4-2-1-3-5(8-4)7(11)12/h1-2,5H,3H2,(H,9,10)(H,11,12)/p-2/t5-/m0/s1	UWOCFOFVIBZJGH-YFKPBYRVSA-L	CHEBI:30620	SBO:0000247
414	hxcoa[c]	Hexanoyl-CoA(n-C6:0CoA)	C05270	cpd03124	C27H43N7O17P3S	-3	HEXANOYL-COA	hxcoa_c	HMDB02845	MNXM553	53262356	77326	InChI=1S/C27H46N7O17P3S/c1-4-5-6-7-18(36)55-11-10-29-17(35)8-9-30-25(39)22(38)27(2,3)13-48-54(45,46)51-53(43,44)47-12-16-21(50-52(40,41)42)20(37)26(49-16)34-15-33-19-23(28)31-14-32-24(19)34/h14-16,20-22,26,37-38H,4-13H2,1-3H3,(H,29,35)(H,30,39)(H,43,44)(H,45,46)(H2,28,31,32)(H2,40,41,42)/p-4/t16-,20-,21-,22+,26-/m1/s1	OEXFMSFODMQEPE-HDRQGHTBSA-J	CHEBI:62620	SBO:0000247
415	trnagly[c]	tRNA(Gly)	C01642	cpd11913	R	0	GLY-tRNAs	trnagly_c	[]	MNXM90340	[]	[]	[]	[]	CHEBI:29176	SBO:0000247
416	glytrna[c]	Glycyl-tRNA(Gly)	C02412	cpd12100	C2H4NOR	1	Charged-GLY-tRNAs	glytrna_c	[]	MNXM162943	[]	[]	[]	[]	CHEBI:29156	SBO:0000247
417	5mthf[c]	5-Methyltetrahydrofolate	C00440	cpd00345	C20H23N7O6	-2	5-METHYL-THF	5mthf_c	HMDB01396	MNXM318	42626431	[]	InChI=1S/C20H25N7O6/c1-27-12(9-23-16-15(27)18(31)26-20(21)25-16)8-22-11-4-2-10(3-5-11)17(30)24-13(19(32)33)6-7-14(28)29/h2-5,12-13,22H,6-9H2,1H3,(H,24,30)(H,28,29)(H,32,33)(H4,21,23,25,26,31)/p-2/t12-,13-/m0/s1	ZNOVTXRBGFNYRX-STQMWFEESA-L	CHEBI:18608	SBO:0000247
418	gdptp[c]	Guanosine 3-diphosphate 5-triphosphate	C04494	cpd02740	C10H13N5O20P5	-5	GDP-TP	gdptp_c	HMDB60480	MNXM1561	46173549	[]	InChI=1S/C10H18N5O20P5/c11-10-13-7-4(8(17)14-10)12-2-15(7)9-5(16)6(32-39(26,27)33-36(18,19)20)3(31-9)1-30-38(24,25)35-40(28,29)34-37(21,22)23/h2-3,5-6,9,16H,1H2,(H,24,25)(H,26,27)(H,28,29)(H2,18,19,20)(H2,21,22,23)(H3,11,13,14,17)/p-7/t3-,5-,6-,9-/m1/s1	KCPMACXZAITQAX-UUOKFMHZSA-G	CHEBI:71477	SBO:0000247
419	ppgpp[c]	Guanosine 3,5-bis(diphosphate)	C01228	cpd00905	C10H13N5O17P4	-4	GUANOSINE-5DP-3DP	ppgpp_c	HMDB59638	MNXM1189	15938967	[]	InChI=1S/C10H17N5O17P4/c11-10-13-7-4(8(17)14-10)12-2-15(7)9-5(16)6(30-36(26,27)32-34(21,22)23)3(29-9)1-28-35(24,25)31-33(18,19)20/h2-3,5-6,9,16H,1H2,(H,24,25)(H,26,27)(H2,18,19,20)(H2,21,22,23)(H3,11,13,14,17)/p-6/t3-,5-,6-,9-/m1/s1	BUFLLCUFNHESEH-UUOKFMHZSA-H	CHEBI:58215	SBO:0000247
420	rdmbzi[c]	N1-(alpha-D-ribosyl)-5,6-dimethylbenzimidazole	C05775	cpd03423	C14H18N2O4	0	ALPHA-RIBAZOLE	rdmbzi_c	HMDB11112	MNXM1539	160433	[]	InChI=1S/C14H18N2O4/c1-7-3-9-10(4-8(7)2)16(6-15-9)14-13(19)12(18)11(5-17)20-14/h3-4,6,11-14,17-19H,5H2,1-2H3/t11-,12-,13-,14+/m1/s1	HLRUKOJSWOKCPP-SYQHCUMBSA-N	CHEBI:10329	SBO:0000247
421	hx2coa[c]	trans-Hex-2-enoyl-CoA	C05271	cpd03125	C27H41N7O17P3S	-3	CPD0-2121	hx2coa_c	HMDB03944	MNXM753	52921640	77324	InChI=1S/C27H44N7O17P3S/c1-4-5-6-7-18(36)55-11-10-29-17(35)8-9-30-25(39)22(38)27(2,3)13-48-54(45,46)51-53(43,44)47-12-16-21(50-52(40,41)42)20(37)26(49-16)34-15-33-19-23(28)31-14-32-24(19)34/h6-7,14-16,20-22,26,37-38H,4-5,8-13H2,1-3H3,(H,29,35)(H,30,39)(H,43,44)(H,45,46)(H2,28,31,32)(H2,40,41,42)/p-4/b7-6+/t16-,20-,21-,22+,26-/m1/s1	OINXHIBNZUUIMR-IXUYQXAASA-J	CHEBI:62077	SBO:0000247
422	uamag[c]	UDP-N-acetylmuramoyl-L-alanyl-D-glutamate	C00692	cpd00525	C28H39N5O23P2	-4	UDP-AA-GLUTAMATE	uamag_c	[]	MNXM955	25243858	[]	InChI=1S/C28H43N5O23P2/c1-10(23(42)31-13(26(44)45)4-5-17(37)38)29-24(43)11(2)52-22-18(30-12(3)35)27(54-14(8-34)20(22)40)55-58(49,50)56-57(47,48)51-9-15-19(39)21(41)25(53-15)33-7-6-16(36)32-28(33)46/h6-7,10-11,13-15,18-22,25,27,34,39-41H,4-5,8-9H2,1-3H3,(H,29,43)(H,30,35)(H,31,42)(H,37,38)(H,44,45)(H,47,48)(H,49,50)(H,32,36,46)/p-4/t10-,11+,13+,14+,15+,18+,19+,20+,21+,22+,25+,27+/m0/s1	OJZCATPXPWFLHF-HPUCEMLMSA-J	CHEBI:83900	SBO:0000247
423	dcmp[c]	dCMP	C00239	cpd00206	C9H13N3O7P	-1	DCMP	dcmp_c	HMDB01202	MNXM266	7058169	[]	InChI=1S/C9H14N3O7P/c10-7-1-2-12(9(14)11-7)8-3-5(13)6(19-8)4-18-20(15,16)17/h1-2,5-6,8,13H,3-4H2,(H2,10,11,14)(H2,15,16,17)/p-2/t5-,6+,8+/m0/s1	NCMVOABPESMRCP-SHYZEUOFSA-L	CHEBI:57566	SBO:0000247
424	2mahmp[c]	2-Methyl-4-amino-5-hydroxymethylpyrimidine diphosphate	C04752	cpd02894	C6H9N3O7P2	-2	AMINO-HYDROXYMETHYL-METHYLPYRIMIDINE-PP	2mahmp_c	[]	MNXM1135	25245586	[]	InChI=1S/C6H11N3O7P2/c1-4-8-2-5(6(7)9-4)3-15-18(13,14)16-17(10,11)12/h2H,3H2,1H3,(H,13,14)(H2,7,8,9)(H2,10,11,12)/p-3	AGQJQCFEPUVXNK-UHFFFAOYSA-K	CHEBI:57841	SBO:0000247
425	thmmp[c]	Thiamin monophosphate	C01081	cpd00793	C12H17N4O4PS	0	THIAMINE-P	thmmp_c	HMDB02666	MNXM662	15942892	[]	InChI=1S/C12H17N4O4PS/c1-8-11(3-4-20-21(17,18)19)22-7-16(8)6-10-5-14-9(2)15-12(10)13/h5,7H,3-4,6H2,1-2H3,(H3-,13,14,15,17,18,19)/p-1	HZSAJDVWZRBGIF-UHFFFAOYSA-M	CHEBI:37575	SBO:0000247
426	gam6p[c]	D-Glucosamine 6-phosphate	C00352	cpd00288	C6H14NO8P	0	D-GLUCOSAMINE-6-P	gam6p_c	[]	MNXM370	45266742	[]	InChI=1S/C6H14NO8P/c7-3-5(9)4(8)2(15-6(3)10)1-14-16(11,12)13/h2-6,8-10H,1,7H2,(H2,11,12,13)/p-1/t2-,3-,4-,5-,6?/m1/s1	XHMJOUIAFHJHBW-IVMDWMLBSA-M	CHEBI:58725	SBO:0000247
427	trnahis[c]	tRNA(His)	C01643	cpd11914	R	0	HIS-tRNAs	trnahis_c	[]	MNXM90878	[]	[]	[]	[]	CHEBI:29178	SBO:0000247
428	histrna[c]	L-Histidyl-tRNA(His)	C02988	cpd12228	C6H8N3OR	1	Charged-HIS-tRNAs	histrna_c	[]	MNXM167415	[]	[]	[]	[]	CHEBI:29155	SBO:0000247
429	trnaser[c]	tRNA(Ser)	C01650	cpd11921	R	0	SER-tRNAs	trnaser_c	[]	MNXM91028	[]	[]	[]	[]	CHEBI:29179	SBO:0000247
430	sertrna[c]	L-Seryl-tRNA(Ser)	C02553	cpd12132	C3H5NO2R	0	Charged-SER-tRNAs	sertrna_c	[]	MNXM89803	[]	[]	[]	[]	CHEBI:29162	SBO:0000247
431	asp__D[c]	D-Aspartate	C00402	cpd00320	C4H6NO4	-1	CPD-302	asp__D_c	HMDB06483	MNXM974	5460295	[]	InChI=1S/C4H7NO4/c5-2(4(8)9)1-3(6)7/h2H,1,5H2,(H,6,7)(H,8,9)/p-1/t2-/m1/s1	CKLJMWTZIZZHCS-UWTATZPHSA-M	CHEBI:29990	SBO:0000247
432	achms[c]	O-Acetyl-L-homoserine	C01077	cpd00790	C6H11NO4	0	CPD-667	achms_c	[]	MNXM699	25244888	[]	InChI=1S/C6H11NO4/c1-4(8)11-3-2-5(7)6(9)10/h5H,2-3,7H2,1H3,(H,9,10)/t5-/m0/s1	FCXZBWSIAGGPCB-YFKPBYRVSA-N	CHEBI:57716	SBO:0000247
433	so3[c]	Sulfite	C00094	cpd00081	HO3S	-1	H2SO3	so3_c	HMDB34829	[]	1100	[]	InChI=1S/H2O3S/c1-4(2)3/h(H2,1,2,3)	LSNNMFCWUKXFEE-UHFFFAOYSA-N	CHEBI:48854	SBO:0000247
434	trnamet[c]	tRNA(Met)	C01647	cpd11918	R	0	MET-tRNAs	trnamet_c	[]	[]	[]	[]	[]	[]	CHEBI:29173	SBO:0000247
435	mettrna[c]	L-Methionyl-tRNA (Met)	C02430	cpd12105	C5H9NOSR	0	Charged-MET-tRNAs	mettrna_c	[]	MNXM16649	[]	[]	[]	[]	CHEBI:16635	SBO:0000247
436	rhcys[c]	S-Ribosyl-L-homocysteine	C03539	cpd02227	C9H17NO6S	0	CPD-564	rhcys_c	[]	MNXM1777	25245776	[]	InChI=1S/C9H17NO6S/c10-4(8(13)14)1-2-17-3-5-6(11)7(12)9(15)16-5/h4-7,9,11-12,15H,1-3,10H2,(H,13,14)/t4-,5+,6+,7+,9?/m0/s1	IQFWYNFDWRYSRA-BLELIYKESA-N	CHEBI:58195	SBO:0000247
437	pser__L[c]	O-Phospho-L-serine	C01005	cpd00738	C3H7NO6P	-1	3-P-SERINE	pser__L_c	HMDB00272	MNXM379	7059387	936706	InChI=1S/C3H8NO6P/c4-2(3(5)6)1-10-11(7,8)9/h2H,1,4H2,(H,5,6)(H2,7,8,9)/p-2/t2-/m0/s1	BZQFBWGGLXLEPQ-REOHCLBHSA-L	CHEBI:57524	SBO:0000247
438	ddcacoa[c]	Dodecanoyl-CoA(n-C12:0CoA)	C01832	cpd01260	C33H54N7O17P3S	-4	LAUROYLCOA-CPD	ddcacoa_c	HMDB03571	MNXM363	25113193	77261	InChI=1S/C33H58N7O17P3S/c1-4-5-6-7-8-9-10-11-12-13-24(42)61-17-16-35-23(41)14-15-36-31(45)28(44)33(2,3)19-54-60(51,52)57-59(49,50)53-18-22-27(56-58(46,47)48)26(43)32(55-22)40-21-39-25-29(34)37-20-38-30(25)40/h20-22,26-28,32,43-44H,4-19H2,1-3H3,(H,35,41)(H,36,45)(H,49,50)(H,51,52)(H2,34,37,38)(H2,46,47,48)/p-4/t22-,26-,27-,28+,32-/m1/s1	YMCXGHLSVALICC-GMHMEAMDSA-J	CHEBI:57375	SBO:0000247
439	trnaala[c]	tRNA(Ala)	C01635	cpd11906	R	0	ALA-tRNAs	trnaala_c	[]	MNXM89576	[]	[]	[]	[]	CHEBI:29170	SBO:0000247
440	alatrna[c]	L-Alanyl-tRNA(Ala)	C00886	cpd11770	C3H6NOR	1	Charged-ALA-tRNAs	alatrna_c	[]	MNXM162942	[]	[]	[]	[]	CHEBI:17732	SBO:0000247
441	trnaphe[c]	tRNA(Phe)	C01648	cpd11919	R	0	PHE-tRNAs	trnaphe_c	[]	MNXM90753	[]	[]	[]	[]	CHEBI:29184	SBO:0000247
442	phetrna[c]	L-Phenylalanyl-tRNA(Phe)	C03511	cpd12335	C9H10NOR	1	Charged-PHE-tRNAs	phetrna_c	[]	MNXM162944	[]	[]	[]	[]	CHEBI:29153	SBO:0000247
443	occoa[c]	Octanoyl-CoA(n-C8:0CoA)	C01944	cpd01335	C29H47N7O17P3S	-3	CPD-196	occoa_c	HMDB01070	MNXM342	25245711	[]	InChI=1S/C29H50N7O17P3S/c1-4-5-6-7-8-9-20(38)57-13-12-31-19(37)10-11-32-27(41)24(40)29(2,3)15-50-56(47,48)53-55(45,46)49-14-18-23(52-54(42,43)44)22(39)28(51-18)36-17-35-21-25(30)33-16-34-26(21)36/h16-18,22-24,28,39-40H,4-15H2,1-3H3,(H,31,37)(H,32,41)(H,45,46)(H,47,48)(H2,30,33,34)(H2,42,43,44)/p-4/t18-,22-,23-,24+,28-/m1/s1	KQMZYOXOBSXMII-CECATXLMSA-J	CHEBI:57386	SBO:0000247
444	aps[c]	Adenosine 5-phosphosulfate	C00224	cpd00193	C10H12N5O10PS	-2	APS	aps_c	HMDB01003	MNXM287	49852317	174370	InChI=1S/C10H14N5O10PS/c11-8-5-9(13-2-12-8)15(3-14-5)10-7(17)6(16)4(24-10)1-23-26(18,19)25-27(20,21)22/h2-4,6-7,10,16-17H,1H2,(H,18,19)(H2,11,12,13)(H,20,21,22)/p-2/t4-,6-,7-,10-/m1/s1	IRLPACMLTUPBCL-KQYNXXCUSA-L	CHEBI:58243	SBO:0000247
445	2pg[c]	D-Glycerate 2-phosphate	C00631	cpd00482	C3H4O7P	-3	2-PG	2pg_c	HMDB03391	MNXM275	40467846	30485	InChI=1S/C3H7O7P/c4-1-2(3(5)6)10-11(7,8)9/h2,4H,1H2,(H,5,6)(H2,7,8,9)/p-3/t2-/m1/s1	GXIURPTVHJPJLF-UWTATZPHSA-K	CHEBI:58289	SBO:0000247
446	trnatyr[c]	tRNA(Tyr)	C00787	cpd11751	C10H12N5O3R	0	TYR-tRNAs	trnatyr_c	[]	MNXM90668	[]	[]	[]	[]	CHEBI:29182	SBO:0000247
447	tyrtrna[c]	L-Tyrosyl-tRNA(Tyr)	C02839	cpd12194	C19H22N6O5R	1	Charged-TYR-tRNAs	tyrtrna_c	[]	MNXM16655	[]	[]	[]	[]	CHEBI:29161	SBO:0000247
448	4ampm[c]	4-Amino-2-methyl-5-phosphomethylpyrimidine	C04556	cpd02775	C6H9N3O4P	-1	AMINO-HYDROXYMETHYL-METHYL-PYR-P	4ampm_c	[]	MNXM790	25244846	[]	InChI=1S/C6H10N3O4P/c1-4-8-2-5(6(7)9-4)3-13-14(10,11)12/h2H,3H2,1H3,(H2,7,8,9)(H2,10,11,12)/p-2	PKYFHKIYHBRTPI-UHFFFAOYSA-L	CHEBI:58354	SBO:0000247
449	fprica[c]	5-Formamido-1-(5-phospho-D-ribosyl)imidazole-4-carboxamide	C04734	cpd02884	C10H14N4O9P	-1	PHOSPHORIBOSYL-FORMAMIDO-CARBOXAMIDE	fprica_c	HMDB01439	MNXM456	45266654	111427	InChI=1S/C10H15N4O9P/c11-8(18)5-9(13-3-15)14(2-12-5)10-7(17)6(16)4(23-10)1-22-24(19,20)21/h2-4,6-7,10,16-17H,1H2,(H2,11,18)(H,13,15)(H2,19,20,21)/p-2/t4-,6-,7-,10-/m1/s1	ABCOOORLYAOBOZ-KQYNXXCUSA-L	CHEBI:58467	SBO:0000247
450	trnacys[c]	tRNA(Cys)	C01639	cpd11910	R	0	CYS-tRNAs	trnacys_c	[]	MNXM162355	[]	[]	[]	[]	CHEBI:29167	SBO:0000247
451	cystrna[c]	L-Cysteinyl-tRNA(Cys)	C03125	cpd12255	C3H6NOSR	1	Charged-CYS-tRNAs	cystrna_c	[]	MNXM90012	[]	[]	[]	[]	CHEBI:29152	SBO:0000247
452	gthox[c]	Oxidized glutathione	C00127	cpd00111	C20H30N6O12S2	-2	OXIDIZED-GLUTATHIONE	gthox_c	HMDB03337	MNXM151	40467895	[]	InChI=1S/C20H32N6O12S2/c21-9(19(35)36)1-3-13(27)25-11(17(33)23-5-15(29)30)7-39-40-8-12(18(34)24-6-16(31)32)26-14(28)4-2-10(22)20(37)38/h9-12H,1-8,21-22H2,(H,23,33)(H,24,34)(H,25,27)(H,26,28)(H,29,30)(H,31,32)(H,35,36)(H,37,38)/p-2/t9-,10-,11-,12-/m0/s1	YPZRWBKMTBYPTK-BJDJZHNGSA-L	CHEBI:58297	SBO:0000247
453	4ppan[c]	D-4-Phosphopantothenate	C03492	cpd02201	C9H16NO8P	-2	4-P-PANTOTHENATE	4ppan_c	HMDB01016	MNXM415	16755653	196786	InChI=1S/C9H18NO8P/c1-9(2,5-18-19(15,16)17)7(13)8(14)10-4-3-6(11)12/h7,13H,3-5H2,1-2H3,(H,10,14)(H,11,12)(H2,15,16,17)/p-3/t7-/m0/s1	XHFVGHPGDLDEQO-ZETCQYMHSA-K	CHEBI:10986	SBO:0000247
454	ptth[c]	Pantetheine	C00831	cpd00620	C11H22N2O4S	0	CPD-511	ptth_c	HMDB03426	MNXM1154	439322	8938313	InChI=1S/C11H22N2O4S/c1-11(2,7-14)9(16)10(17)13-4-3-8(15)12-5-6-18/h9,14,16,18H,3-7H2,1-2H3,(H,12,15)(H,13,17)/t9-/m0/s1	ZNXZGRMVNNHPCA-VIFPVBQESA-N	CHEBI:16753	SBO:0000247
455	dscl[c]	dihydrosirohydrochlorin	C02463	cpd01620	C42H40N4O16	-8	DIHYDROSIROHYDROCHLORIN	dscl_c	[]	MNXM672	25245987	[]	InChI=1S/C42H48N4O16/c1-41(17-39(59)60)23(5-9-35(51)52)29-14-27-21(11-37(55)56)19(3-7-33(47)48)25(43-27)13-26-20(4-8-34(49)50)22(12-38(57)58)28(44-26)15-31-42(2,18-40(61)62)24(6-10-36(53)54)30(46-31)16-32(41)45-29/h14-16,23-24,43-45H,3-13,17-18H2,1-2H3,(H,47,48)(H,49,50)(H,51,52)(H,53,54)(H,55,56)(H,57,58)(H,59,60)(H,61,62)/p-7/b29-14-,31-15-,32-16-/t23-,24-,41+,42+/m1/s1	OQIIYZQTTMKFAU-ZNLOQLQNSA-G	CHEBI:58827	SBO:0000247
456	scl[c]	sirohydrochlorin	C05778	cpd03426	C42H38N4O16	-8	SIROHYDROCHLORIN	scl_c	[]	MNXM863	25245154	[]	InChI=1S/C42H46N4O16/c1-41(17-39(59)60)23(5-9-35(51)52)29-14-27-21(11-37(55)56)19(3-7-33(47)48)25(43-27)13-26-20(4-8-34(49)50)22(12-38(57)58)28(44-26)15-31-42(2,18-40(61)62)24(6-10-36(53)54)30(46-31)16-32(41)45-29/h13-16,23-24,44-45H,3-12,17-18H2,1-2H3,(H,47,48)(H,49,50)(H,51,52)(H,53,54)(H,55,56)(H,57,58)(H,59,60)(H,61,62)/p-8/b25-13-,29-14-,31-15-,32-16-/t23-,24-,41+,42+/m1/s1	KWIZRXMMFRBUML-AHGFGAHVSA-F	CHEBI:58351	SBO:0000247
457	trnathr[c]	tRNA(Thr)	C01651	cpd11922	R	0	THR-tRNAs	trnathr_c	[]	MNXM90883	[]	[]	[]	[]	CHEBI:29180	SBO:0000247
458	thrtrna[c]	L-Threonyl-tRNA(Thr)	C02992	cpd12229	C4H7NO2R	0	Charged-THR-tRNAs	thrtrna_c	[]	MNXM167417	[]	[]	[]	[]	CHEBI:29163	SBO:0000247
459	tdcoa[c]	Tetradecanoyl-CoA(n-C14:0CoA)	C02593	cpd01695	C35H59N7O17P3S	-3	TETRADECANOYL-COA	tdcoa_c	HMDB01521	MNXM224	25244582	77272	InChI=1S/C35H62N7O17P3S/c1-4-5-6-7-8-9-10-11-12-13-14-15-26(44)63-19-18-37-25(43)16-17-38-33(47)30(46)35(2,3)21-56-62(53,54)59-61(51,52)55-20-24-29(58-60(48,49)50)28(45)34(57-24)42-23-41-27-31(36)39-22-40-32(27)42/h22-24,28-30,34,45-46H,4-21H2,1-3H3,(H,37,43)(H,38,47)(H,51,52)(H,53,54)(H2,36,39,40)(H2,48,49,50)/p-4/t24-,28-,29-,30+,34-/m1/s1	DUAFKXOFBZQTQE-QSGBVPJFSA-J	CHEBI:57385	SBO:0000247
460	fmettrna[c]	N-Formylmethionyl-tRNA	C03294	cpd12285	C6H8NO2SR	0	Elongation-tRNAMet	fmettrna_c	[]	MNXM90882	[]	[]	[]	[]	CHEBI:17119	SBO:0000247
461	trnaglu[c]	tRNA(Glu)	C01641	cpd11912	R	0	GLT-tRNAs	trnaglu_c	[]	MNXM90886	[]	[]	[]	[]	CHEBI:29175	SBO:0000247
462	glutrna[c]	L-Glutamyl-tRNA(Glu)	C02987	cpd12227	C5H7NO3R	0	Charged-GLT-tRNAs	glutrna_c	[]	MNXM164670	[]	[]	[]	[]	CHEBI:29157	SBO:0000247
463	trnaile[c]	tRNA(Ile)	C01644	cpd11915	R	0	ILE-tRNAs	trnaile_c	[]	MNXM90879	[]	[]	[]	[]	CHEBI:29174	SBO:0000247
464	iletrna[c]	L-Isoleucyl-tRNA(Ile)	C03127	cpd12256	C6H12NOR	1	Charged-ILE-tRNAs	iletrna_c	[]	MNXM16648	[]	[]	[]	[]	CHEBI:29160	SBO:0000247
465	Largn[c]	L-Arogenate	C00826	cpd00616	C10H12NO5	-1	CPD-659	Largn_c	[]	MNXM696	25244469	[]	InChI=1S/C10H13NO5/c11-7(8(13)14)5-10(9(15)16)3-1-6(12)2-4-10/h1-4,6-7,12H,5,11H2,(H,13,14)(H,15,16)/p-1/t6?,7-,10?/m0/s1	MIEILDYWGANZNH-DSQUFTABSA-M	CHEBI:58180	SBO:0000247
466	trnaasp[c]	tRNA(Asp)	C01638	cpd11909	R	0	ASP-tRNAs	trnaasp_c	[]	MNXM90752	[]	[]	[]	[]	CHEBI:29186	SBO:0000247
467	asptrna[c]	L-Aspartyl-tRNA(Asp)	C02984	cpd12226	C4H5NO3R	0	Charged-ASP-tRNAs	asptrna_c	[]	MNXM167414	[]	[]	[]	[]	CHEBI:29158	SBO:0000247
468	trnaval[c]	tRNA(Val)	C01653	cpd11924	R	0	VAL-tRNAs	trnaval_c	[]	MNXM90885	[]	[]	[]	[]	CHEBI:29183	SBO:0000247
469	valtrna[c]	L-Valyl-tRNA(Val)	C02554	cpd12133	C5H10NOR	1	Charged-VAL-tRNAs	valtrna_c	[]	MNXM167419	[]	[]	[]	[]	CHEBI:29164	SBO:0000247
470	4ppcys[c]	N-((R)-4-Phosphopantothenoyl)-L-cysteine	C04352	cpd02666	C12H21N2O9PS	-2	R-4-PHOSPHOPANTOTHENOYL-L-CYSTEINE	4ppcys_c	HMDB01117	MNXM483	25245609	196834	InChI=1S/C12H23N2O9PS/c1-12(2,6-23-24(20,21)22)9(16)10(17)13-4-3-8(15)14-7(5-25)11(18)19/h7,9,16,25H,3-6H2,1-2H3,(H,13,17)(H,14,15)(H,18,19)(H2,20,21,22)/p-3/t7-,9-/m0/s1	XQYALQVLCNHCFT-CBAPKCEASA-K	CHEBI:59458	SBO:0000247
471	ohpb[c]	2-Oxo-3-hydroxy-4-phosphobutanoate	C06054	cpd03606	C4H5O8P	-2	3OH-4P-OH-ALPHA-KETOBUTYRATE	ohpb_c	HMDB06801	MNXM1514	45266680	[]	InChI=1S/C4H7O8P/c5-2(3(6)4(7)8)1-12-13(9,10)11/h2,5H,1H2,(H,7,8)(H2,9,10,11)/p-3/t2-/m1/s1	MZJFVXDTNBHTKZ-UWTATZPHSA-K	CHEBI:58538	SBO:0000247
472	sheme[c]	Siroheme	C00748	cpd00557	C42H36N4O16Fe	-8	SIROHEME	sheme_c	[]	MNXM82173	70678579	[]	InChI=1S/C42H46N4O16.Fe/c1-41(17-39(59)60)23(5-9-35(51)52)29-14-27-21(11-37(55)56)19(3-7-33(47)48)25(43-27)13-26-20(4-8-34(49)50)22(12-38(57)58)28(44-26)15-31-42(2,18-40(61)62)24(6-10-36(53)54)30(46-31)16-32(41)45-29;/h13-16,23-24H,3-12,17-18H2,1-2H3,(H10,43,44,45,46,47,48,49,50,51,52,53,54,55,56,57,58,59,60,61,62);/q;+2/p-10/t23-,24-,41+,42+;/m1./s1	DLKSSIHHLYNIKN-QIISWYHFSA-D	CHEBI:60052	SBO:0000247
473	trnaarg[c]	tRNA(Arg)	C01636	cpd11907	R	0	ARG-tRNAs	trnaarg_c	[]	MNXM90751	[]	[]	[]	[]	CHEBI:29171	SBO:0000247
474	argtrna[c]	L-Arginyl-tRNA(Arg)	C02163	cpd12036	C6H14N4OR	2	Charged-ARG-tRNAs	argtrna_c	[]	MNXM162827	[]	[]	[]	[]	CHEBI:18366	SBO:0000247
475	trnaleu[c]	tRNA(Leu)	C01645	cpd11916	R	0	LEU-tRNAs	trnaleu_c	[]	MNXM90880	[]	[]	[]	[]	CHEBI:29169	SBO:0000247
476	leutrna[c]	L-Leucyl-tRNA(Leu)	C02047	cpd12003	C6H12NOR	1	Charged-LEU-tRNAs	leutrna_c	[]	MNXM8390	[]	[]	[]	[]	CHEBI:16624	SBO:0000247
477	sdhlam[c]	S-Succinyldihydrolipoamide	C01169	cpd00860	C12H20NO4S2	-1	CPD0-341	sdhlam_c	HMDB01177	MNXM3710	90657579	[]	InChI=1S/C12H21NO4S2/c13-10(14)4-2-1-3-9(7-8-18)19-12(17)6-5-11(15)16/h9,18H,1-8H2,(H2,13,14)(H,15,16)/p-1/t9-/m0/s1	RJCJWONCSKSHES-VIFPVBQESA-M	CHEBI:17432	SBO:0000247
478	trnapro[c]	tRNA(Pro)	C01649	cpd11920	R	0	PRO-tRNAs	trnapro_c	[]	MNXM90667	[]	[]	[]	[]	CHEBI:29177	SBO:0000247
479	protrna[c]	L-Prolyl-tRNA(Pro)	C02702	cpd12164	C5H7NOR	0	Charged-PRO-tRNAs	protrna_c	[]	MNXM167416	[]	[]	[]	[]	CHEBI:29154	SBO:0000247
480	mmtsa[c]	(S)-Methylmalonate semialdehyde	C06002	cpd00287	C4H5O3	-1	CH3-MALONATE-S-ALD	mmtsa_c	HMDB02217	MNXM933	46173457	[]	InChI=1S/C4H6O3/c1-3(2-5)4(6)7/h2-3H,1H3,(H,6,7)/p-1/t3-/m0/s1	VOKUMXABRRXHAR-VKHMYHEASA-M	CHEBI:62413	SBO:0000247
481	3aib[c]	L-3-Amino-isobutanoate	C03284	cpd02096	C4H9NO2	0	CPD-466	3aib_c	HMDB02166	MNXM2053	6971062	[]	InChI=1S/C4H9NO2/c1-3(2-5)4(6)7/h3H,2,5H2,1H3,(H,6,7)/t3-/m0/s1	QCHPKSFMDHPSNR-VKHMYHEASA-N	CHEBI:58655	SBO:0000247
482	ptcys[c]	N-Pantothenoylcysteine	C04079	cpd02524	C12H21N2O6S	-1	CPD-46	ptcys_c	HMDB06834	MNXM3059	25201296	[]	InChI=1S/C12H22N2O6S/c1-12(2,6-15)9(17)10(18)13-4-3-8(16)14-7(5-21)11(19)20/h7,9,15,17,21H,3-6H2,1-2H3,(H,13,18)(H,14,16)(H,19,20)/p-1/t7-,9-/m0/s1	QSYCTARXWYLMOF-CBAPKCEASA-M	CHEBI:58480	SBO:0000247
483	fixedNH3[e]	fixedNH3	C00014	cpd00013	H3N	0	AMMONIA	[]	HMDB00051	[]	222	[]	InChI=1S/H3N/h1H3	QGZKDVFQNNGYKY-UHFFFAOYSA-N	CHEBI:16134	SBO:0000247
484	zn2[c]	Zn2+	C00038	cpd00034	Zn	2	ZN+2	zn2_c	HMDB01303	MNXM149	32051	[]	InChI=1S/Zn/q+2	PTFCDOFLOPIGGS-UHFFFAOYSA-N	CHEBI:29105	SBO:0000247
485	Symbiotic_Cofactors[c]	Symbiotic_Cofactors	[]	[]	C184H242N39O68P5S7Fe5CoMgMoZn	0	[]	[]	[]	[]	[]	[]	[]	[]	[]	SBO:0000247
486	phb[c]	poly-b-hydroxybutyrate	C06143	cpd12836	C4H6O2	-1	Poly-Hydroxybutyrate	phb_c	[]	MNXM77380	[]	[]	[]	[]	CHEBI:8295	SBO:0000247
487	zn2[e]	Zn2+	C00038	cpd00034	Zn	2	ZN+2	zn2_e	HMDB01303	MNXM149	32051	[]	InChI=1S/Zn/q+2	PTFCDOFLOPIGGS-UHFFFAOYSA-N	CHEBI:29105	SBO:0000247
488	h2[e]	H2	C00282	cpd11640	H2	0	HYDROGEN-MOLECULE	h2_e	HMDB01362	MNXM195	783	113555	InChI=1S/H2/h1H	UFHFLCQGNIYNRP-UHFFFAOYSA-N	CHEBI:18276	SBO:0000247
489	3hbcoaR[c]	(R)-3-Hydroxybutanoyl-CoA	C03561	cpd02234	C25H39N7O18P3S	-3	CPD-650	3hbcoaR_c	HMDB01166	MNXM1058	45266552	[]	InChI=1S/C25H42N7O18P3S/c1-13(33)8-16(35)54-7-6-27-15(34)4-5-28-23(38)20(37)25(2,3)10-47-53(44,45)50-52(42,43)46-9-14-19(49-51(39,40)41)18(36)24(48-14)32-12-31-17-21(26)29-11-30-22(17)32/h11-14,18-20,24,33,36-37H,4-10H2,1-3H3,(H,27,34)(H,28,38)(H,42,43)(H,44,45)(H2,26,29,30)(H2,39,40,41)/p-4/t13-,14-,18-,19-,20+,24-/m1/s1	QHHKKMYHDBRONY-WZZMXTMRSA-J	CHEBI:57315	SBO:0000247
490	3hbbRR[c]	(R)-3-((R)-3-Hydroxybutanoyloxy)butanoate	C04546	cpd02767	C8H13O5	-1	CPD-1116	3hbbRR_c	HMDB32418	MNXM3406	9548723	[]	InChI=1S/C8H14O5/c1-5(9)3-8(12)13-6(2)4-7(10)11/h5-6,9H,3-4H2,1-2H3,(H,10,11)/p-1/t5-,6-/m1/s1	RILHUWWTCSDPAN-PHDIDXHHSA-M	CHEBI:10979	SBO:0000247
491	bhb[c]	(R)-3-Hydroxybutanoate	C01089	cpd00797	C4H7O3	-1	CPD-335	bhb_c	HMDB00357	MNXM663	6971058	[]	InChI=1S/C4H8O3/c1-3(5)2-4(6)7/h3,5H,2H2,1H3,(H,6,7)/p-1/t3-/m1/s1	WHBMMWSBFZVSSR-GSVOUGTGSA-M	CHEBI:8298	SBO:0000247
492	acac[c]	Acetoacetate	C00164	cpd00142	C4H5O3	-1	3-KETOBUTYRATE	acac_c	HMDB00060	MNXM154	6971017	[]	InChI=1S/C4H6O3/c1-3(5)2-4(6)7/h2H2,1H3,(H,6,7)/p-1	WDJHALXBUFZDSR-UHFFFAOYSA-M	CHEBI:13705	SBO:0000247
493	glycogen1[c]	glycogen n-1	C00182	cpd00155	C24H42O21	0	Glycogens	[]	HMDB00757	MNXM55375	[]	[]	[]	[]	CHEBI:24384	SBO:0000247
494	5ddglcn[c]	5-Deoxy-D-glucuronate	C03932	cpd02446	C6H9O6	-1	[]	5ddglcn_c	[]	[]	[]	[]	InChI=1S/C6H10O6/c7-2-4(9)6(12)3(8)1-5(10)11/h3,6-8,12H,1-2H2,(H,10,11)/p-1/t3-,6+/m1/s1	UCYNJPYWOSFBAT-CVYQJGLWSA-M	CHEBI:16669	SBO:0000247
495	iasp[c]	Iminoaspartate	C05840	cpd03470	C4H3NO4	-2	IMINOASPARTATE	iasp_c	HMDB01131	MNXM599	23615393	[]	InChI=1S/C4H5NO4/c5-2(4(8)9)1-3(6)7/h5H,1H2,(H,6,7)(H,8,9)/p-2	NMUOATVLLQEYHI-UHFFFAOYSA-L	CHEBI:58831	SBO:0000247
496	Symbiotic_product[c]	Symbiotic product	[]	[]	C43.9761472003H79.5719959184N10.9368612744O14.440904207P0.0408396612S0.0571755257Fe0.0408396612Co0.0081679322Mg0.0081679322Mo0.0081679322Zn0.0081679322	0	[]	[]	[]	[]	[]	[]	[]	[]	[]	SBO:0000247
497	dad_5[c]	5-Deoxyadenosine	C05198	cpd03091	C10H13N5O3	0	CH33ADO	dad_5_c	HMDB01983	MNXM316	439182	[]	InChI=1S/C10H13N5O3/c1-4-6(16)7(17)10(18-4)15-3-14-5-8(11)12-2-13-9(5)15/h2-4,6-7,10,16-17H,1H3,(H2,11,12,13)/t4-,6-,7-,10-/m1/s1	XGYIMTFOTBMPFP-KQYNXXCUSA-N	CHEBI:17319	SBO:0000247
498	5drib[c]	5-Deoxyribose	C22288	cpd15380	C5H10O4	0	CPD0-2167	5drib_c	[]	MNXM4391	[]	[]	InChI=1S/C5H10O4/c1-2-3(6)4(7)5(8)9-2/h2-8H,1H3/t2-,3-,4-,5?/m1/s1	MKMRBXQLEMYZOY-SOOFDHNKSA-N	CHEBI:62012	SBO:0000247
499	etoh[c]	Ethanol	C00469	cpd00363	C2H6O	0	ETOH	etoh_c	HMDB00108	MNXM303	702	[]	InChI=1S/C2H6O/c1-2-3/h3H,2H2,1H3	LFQSCWFLJHTTHZ-UHFFFAOYSA-N	CHEBI:16236	SBO:0000247
500	2dr5p[c]	2-Deoxy-D-ribose 5-phosphate	C00673	cpd00510	C5H9O7P	-2	DEOXY-RIBOSE-5P	2dr5p_c	HMDB01031	MNXM2179	53477568	6787328	InChI=1S/C5H11O7P/c6-3-1-5(7)12-4(3)2-11-13(8,9)10/h3-7H,1-2H2,(H2,8,9,10)/p-2/t3-,4+,5?/m0/s1	KKZFLSZAWCYPOC-PYHARJCCSA-L	CHEBI:62877	SBO:0000247
501	15gl[c]	D-Glucono-1,5-lactone	C00198	cpd00170	C6H10O6	0	GLC-D-LACTONE	15gl_c	HMDB00150	MNXM339	7027	[]	InChI=1S/C6H10O6/c7-1-2-3(8)4(9)5(10)6(11)12-2/h2-5,7-10H,1H2/t2-,3-,4+,5-/m1/s1	PHOQVHQSTUBQQK-SQOUGZDYSA-N	CHEBI:16217	SBO:0000247
502	glcn[c]	D-Gluconate	C00257	cpd00222	C6H11O7	-1	GLUCONATE	glcn_c	HMDB00625	MNXM341	6419706	[]	InChI=1S/C6H12O7/c7-1-2(8)3(9)4(10)5(11)6(12)13/h2-5,7-11H,1H2,(H,12,13)/p-1/t2-,3-,4+,5-/m1/s1	RGHNJXZEOKUKBD-SQOUGZDYSA-M	CHEBI:18391	SBO:0000247
503	pail35p_cho[c]	1-Phosphatidyl-1D-myo-inositol 3,5-bisphosphate	C11556	cpd13384	C9H14O15P3RCO2R2CO2	-5	1-PHOSPHATIDYL-1D-MYO-INOSITOL-35-BISPH	pail35p_cho_c	[]	MNXM170	[]	[]	[]	[]	CHEBI:16851	SBO:0000247
504	pail3p_cho[c]	1-Phosphatidyl-1D-myo-inositol 3-phosphate	C04549	cpd12572	C9H15O12P2RCO2R2CO2	-3	CPD-177	pail3p_cho_c	HMDB03850	MNXM102	[]	[]	[]	[]	CHEBI:17283	SBO:0000247
505	pail4p_cho[c]	1-Phosphatidyl-1D-myo-inositol 4-phosphate	C01277	cpd22880	C9H15O12P2RCO2R2CO2	-3	CPD-1108	pail4p_cho_c	[]	MNXM122	24755482	[]	[]	[]	CHEBI:17526	SBO:0000247
506	pail_cho[c]	1-Phosphatidyl-D-myo-inositol	C01194	cpd27343	C9H16O9PRCO2R2CO2	-1	L-1-phosphatidyl-inositols	pail_cho_c	HMDB06953	MNXM162411	25245335	[]	[]	[]	CHEBI:57880	SBO:0000247
507	3desins[c]	3-Dehydro-scyllo-inosose	C21643	[]	C6H8O6	0	CPD-15236	[]	[]	MNXM147777	90657650	[]	InChI=1S/C6H8O6/c7-1-2(8)4(10)6(12)5(11)3(1)9/h1-3,6-9,12H/t1-,2-,3+,6-	XQCGHIBXRBNZFL-PCGRLTQBSA-N	CHEBI:137015	SBO:0000247
508	syinost[c]	scyllo-Inositol	C06153	cpd03669	C6H12O6	0	CPD-8050	[]	[]	MNXM12923	[]	[]	InChI=1S/C6H12O6/c7-1-2(8)4(10)6(12)5(11)3(1)9/h1-12H/t1-,2-,3+,4+,5-,6-	CDAISMWEOUEBRE-CDRYSYESSA-N	CHEBI:10642	SBO:0000247
509	4mpetz[c]	4-Methyl-5-(2-phosphooxyethyl)thiazole	C04327	cpd02654	C6H8NO4PS	-2	THZ-P	4mpetz_c	[]	MNXM960	25245616	[]	InChI=1S/C6H10NO4PS/c1-5-6(13-4-7-5)2-3-11-12(8,9)10/h4H,2-3H2,1H3,(H2,8,9,10)/p-2	OCYMERZCMYJQQO-UHFFFAOYSA-L	CHEBI:58296	SBO:0000247
510	imgly[c]	Iminoglycine	C15809	cpd14545	C2H3NO2	0	CPD-12279	imgly_c	[]	MNXM1984	23347814	[]	InChI=1S/C2H3NO2/c3-1-2(4)5/h1,3H,(H,4,5)/p-1	TVMUHOAONWHJBV-UHFFFAOYSA-M	CHEBI:53664	SBO:0000247
511	thiosul[c]	Thiocarboxy-[sulfur-carrier protein]	C15814	cpd14550	C4H7N2O2SR	NaN	[]	[]	[]	[]	[]	[]	[]	[]	CHEBI:80102	SBO:0000247
512	2c4mthzep[c]	2-[(2R,5Z)-2-Carboxy-4-methylthiazol-5(2H)-ylidene]ethyl phosphate	C20246	cpd21479	C7H7NO6PS	-3	CPD-13575	2c4mthzep_c	[]	MNXM2758	53477654	[]	InChI=1S/C7H10NO6PS/c1-4-5(2-3-14-15(11,12)13)16-6(8-4)7(9)10/h2,6H,3H2,1H3,(H,9,10)(H2,11,12,13)/p-3/b5-2+/t6-/m1/s1	PQMCQNOVNFNPFJ-AOPYWJJESA-K	CHEBI:62899	SBO:0000247
513	scp[c]	Sulfur-carrier protein	C15810	cpd14546	C4H7N2O3R	NaN	[]	[]	[]	[]	[]	[]	[]	[]	CHEBI:80100	SBO:0000247
514	thmtp[c]	Thiamin triphosphate	C03028	cpd01937	C12H16N4O10P3S	-3	CPD-611	thmtp_c	HMDB01512	MNXM1341	15938964	964965	InChI=1S/C12H19N4O10P3S/c1-8-11(30-7-16(8)6-10-5-14-9(2)15-12(10)13)3-4-24-28(20,21)26-29(22,23)25-27(17,18)19/h5,7H,3-4,6H2,1-2H3,(H5-,13,14,15,17,18,19,20,21,22,23)/p-3	IWLROWZYZPNOFC-UHFFFAOYSA-K	CHEBI:58938	SBO:0000247
515	dmp[c]	Dimethylallyl phosphate	C21214	cpd17040	C5H9O4P	-2	CPD-14332	[]	[]	MNXM101100	18619099	[]	InChI=1S/C5H11O4P/c1-5(2)3-4-9-10(6,7)8/h3H,4H2,1-2H3,(H2,6,7,8)/p-2	MQCJHQBRIPSIKA-UHFFFAOYSA-L	CHEBI:88052	SBO:0000247
516	pl[c]	Prenol	C01390	cpd01000	C5H10O	0	PRENOL	[]	HMDB30124	MNXM5280	11173	[]	InChI=1S/C5H10O/c1-5(2)3-4-6/h3,6H,4H2,1-2H3	ASUAYTHWZCLXAN-UHFFFAOYSA-N	CHEBI:16019	SBO:0000247
517	fmnh2[c]	Reduced FMN	C01847	cpd01270	C17H21N4O9P	-2	FMNH2	fmnh2_c	HMDB01142	MNXM208	44229161	[]	InChI=1S/C17H23N4O9P/c1-7-3-9-10(4-8(7)2)21(15-13(18-9)16(25)20-17(26)19-15)5-11(22)14(24)12(23)6-30-31(27,28)29/h3-4,11-12,14,18,22-24H,5-6H2,1-2H3,(H2,27,28,29)(H2,19,20,25,26)/p-2/t11-,12+,14-/m0/s1	YTNIXZGTHTVJBW-SCRDCRAPSA-L	CHEBI:57618	SBO:0000247
518	prf2[c]	Prenylated FMNH2	C21215	cpd32452	C22H31N4O9P	0	CPD-18260	[]	[]	MNXM165083	102515050	[]	InChI=1S/C22H31N4O9P/c1-10-7-12-16-15(11(10)2)22(3,4)5-6-25(16)17-19(23-21(31)24-20(17)30)26(12)8-13(27)18(29)14(28)9-35-36(32,33)34/h7,13-14,18,27-29H,5-6,8-9H2,1-4H3,(H2,32,33,34)(H2,23,24,30,31)/p-2/t13-,14+,18-/m0/s1	GLNFBGKHGHVPRL-IYOUNJFTSA-L	CHEBI:87531	SBO:0000247
519	3a2oprop[c]	3-Amino-2-oxopropyl phosphate	C11638	cpd08449	C3H8NO5P	-1	1-AMINO-PROPAN-2-ONE-3-PHOSPHATE	3a2oprop_c	[]	MNXM1213	25244426	[]	InChI=1S/C3H8NO5P/c4-1-3(5)2-9-10(6,7)8/h1-2,4H2,(H2,6,7,8)/p-1	HIQNVODXENYOFK-UHFFFAOYSA-M	CHEBI:57279	SBO:0000247
520	no2[c]	Nitrite	C00088	cpd00075	NO2	-1	NITRITE	no2_c	HMDB02786	MNXM107	946	1222379	InChI=1S/HNO2/c2-1-3/h(H,2,3)/p-1	IOVCWXUNBOPUCH-UHFFFAOYSA-M	CHEBI:16301	SBO:0000247
521	focytC[c]	Ferrocytochrome C	C00126	cpd00110	C42H54FeN8O6S2	2	Cytochromes-C-Reduced	focytC_c	[]	[]	[]	[]	[]	[]	CHEBI:16928	SBO:0000247
522	ficytC[c]	Ferricytochrome c	C00125	cpd00109	C42H54FeN8O6S2	3	Oxidized-cytochromes-c553	ficytC_c	[]	MNXM5749	[]	[]	[]	[]	[]	SBO:0000247
523	no[c]	Nitric oxide	C00533	cpd00418	NO	0	NITRIC-OXIDE	no_c	HMDB03378	MNXM228	145068	[]	InChI=1S/NO/c1-2	MWUXSHHQAYIFBG-UHFFFAOYSA-N	CHEBI:16480	SBO:0000247
524	fol[c]	Folate	C00504	cpd00393	C19H17N7O6	-1	CPD-12826	fol_c	HMDB00121	MNXM617	1549092	[]	InChI=1S/C19H19N7O6/c20-19-25-15-14(17(30)26-19)23-11(8-22-15)7-21-10-3-1-9(2-4-10)16(29)24-12(18(31)32)5-6-13(27)28/h1-4,8,12,21H,5-7H2,(H,24,29)(H,27,28)(H,31,32)(H3,20,22,25,26,30)/p-2/t12-/m0/s1	OVBPIULPVIDEAO-LBPRGKRZSA-L	CHEBI:62501	SBO:0000247
525	s8ams[c]	[Protein]-S8-aminomethyldihydrolipoyllysine	C01242	cpd11830	C9H19N2OS2R	0	[]	[]	[]	[]	[]	[]	[]	[]	CHEBI:16882	SBO:0000247
526	dhlpyprot[c]	Dihydrolipoylprotein	C02972	cpd12225	C8H16NOS2R	0	[]	[]	[]	[]	[]	[]	[]	[]	CHEBI:16194	SBO:0000247
527	fa[c]	Folinic acid	C03479	cpd02197	C20H21N7O7	-2	5-FORMYL-THF	[]	HMDB01562	MNXM1392	6560146	[]	InChI=1S/C20H23N7O7/c21-20-25-16-15(18(32)26-20)27(9-28)12(8-23-16)7-22-11-3-1-10(2-4-11)17(31)24-13(19(33)34)5-6-14(29)30/h1-4,9,12-13,22H,5-8H2,(H,24,31)(H,29,30)(H,33,34)(H4,21,23,25,26,32)/p-2/t12-,13-/m0/s1	VVIAGPKUTFNRDU-STQMWFEESA-L	CHEBI:57457	SBO:0000247
528	qun[c]	Quinone	C15602	cpd28018	R	NaN	Quinones	[]	[]	MNXM2499	[]	[]	[]	[]	CHEBI:36141	SBO:0000247
529	hqn[c]	Hydroquinone	C15603	cpd30750	C6H6O2	0	Reduced-Quinones	hqn_c	[]	MNXM4100	[]	[]	InChI=1S/C6H6O2/c7-5-1-2-6(8)4-3-5/h1-4,7-8H	QIGBRXMKCJKVMJ-UHFFFAOYSA-N	CHEBI:17594	SBO:0000247
530	r3mmal[c]	D-erythro-3-Methylmalate	C06029	cpd03590	C5H6O5	-2	CPD-7066	r3mmal_c	[]	MNXM2512	45266666	[]	InChI=1S/C5H8O5/c1-2(4(7)8)3(6)5(9)10/h2-3,6H,1H3,(H,7,8)(H,9,10)/t2-,3+/m0/s1	NPYQJIHHTGFBLN-STHAYSLISA-N	CHEBI:58511	SBO:0000247
531	3hmop[c]	(R)-3-Hydroxy-3-methyl-2-oxopentanoate	C14463	cpd10162	C6H9O4	-1	CPD-15104	3hmop_c	[]	MNXM114594	20846131	[]	InChI=1S/C6H10O4/c1-3-6(2,10)4(7)5(8)9/h10H,3H2,1-2H3,(H,8,9)/p-1/t6-/m1/s1	YJVOWRAWFXRESP-ZCFIWIBFSA-M	CHEBI:49257	SBO:0000247
532	2mm__R[c]	(R)-2-Methylmalate	C02612	cpd01700	C5H8O5	-2	CPD-31	2mm__R_c	[]	MNXM1421	5460281	[]	InChI=1S/C5H8O5/c1-5(10,4(8)9)2-3(6)7/h10H,2H2,1H3,(H,6,7)(H,8,9)/p-2/t5-/m1/s1	XFTRTWQBIOMVPK-RXMQYKEDSA-L	CHEBI:30934	SBO:0000247
533	3hmoa[c]	3-Hydroxy-3-methyl-2-oxobutanoic acid	C04181	cpd02569	C5H7O4	-1	CPD-231	3hmoa_h	[]	MNXM1638	6419735	[]	InChI=1S/C5H8O4/c1-5(2,9)3(6)4(7)8/h9H,1-2H3,(H,7,8)/p-1	DNOPJXBPONYBLB-UHFFFAOYSA-M	CHEBI:11812	SBO:0000247
[truncated: 409 more rows]
